# Supplementary material for: Perturbations in eIF3 subunit stoichiometry alter expression of ribosomal proteins and key components of the MAPK signaling pathways
Source: eLife journal article supplement (doi:10.7554/elife.95846), 2024-03-25

Figure 6C source data

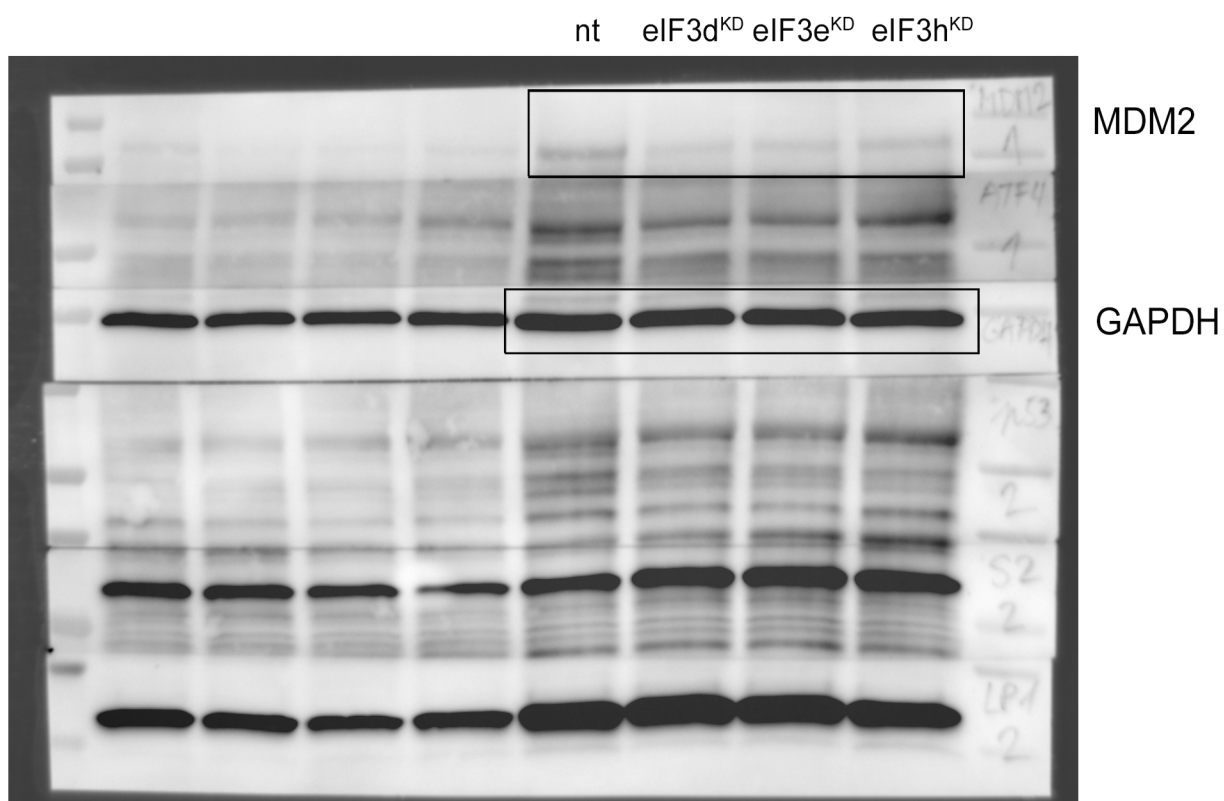

Figure 6D source data

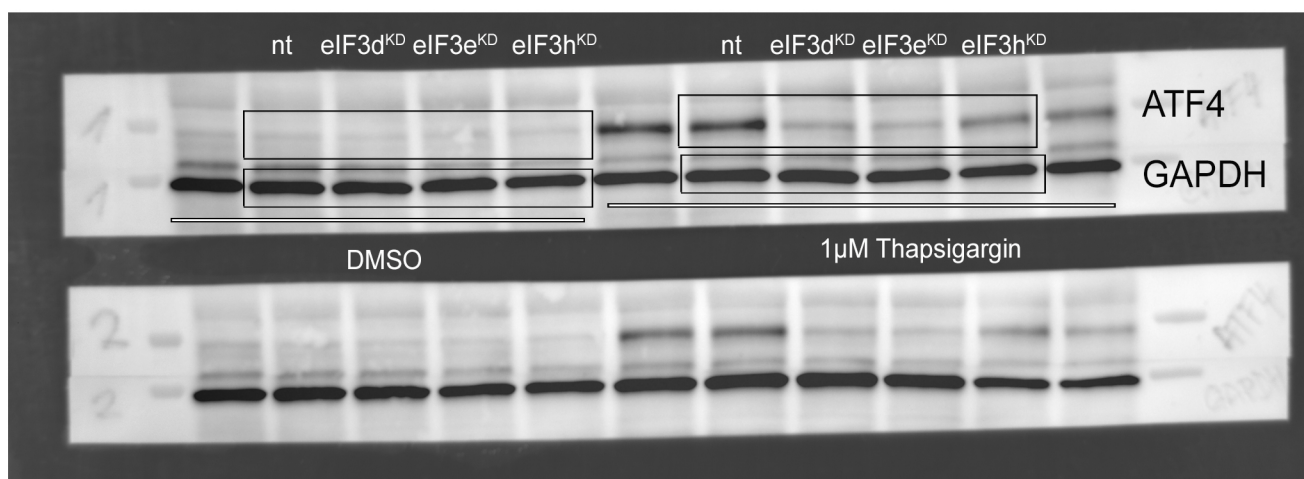

Supplement: fig6-data2 [file elife-95846-fig6-data2-v1.pdf]
