# Supplementary material for: Perturbations in eIF3 subunit stoichiometry alter expression of ribosomal proteins and key components of the MAPK signaling pathways
Source: eLife. 2024 Nov 4;13:RP95846. doi: 10.7554/eLife.95846 (PMC11534336; doi:10.7554/eLife.95846)
Supplement: Supplementary file 1. [file elife-95846-supp1.xlsx]

## Sheet: all data
Unfiltered results for all datasets
FP = footprints
TE = translation efficiency
mRNA = mRNA-seq
gene_id	hgnc_symbol	entrez	FP_d_vs_nt.log2FoldChange	FP_d_vs_nt.padj	FP_e_vs_nt.log2FoldChange	FP_e_vs_nt.padj	FP_h_vs_nt.log2FoldChange	FP_h_vs_nt.padj	TE_d_vs_nt.log2FoldChange	TE_d_vs_nt.padj	TE_e_vs_nt.log2FoldChange	TE_e_vs_nt.padj	TE_h_vs_nt.log2FoldChange	TE_h_vs_nt.padj	mRNA_d_vs_nt.log2FoldChange	mRNA_d_vs_nt.padj	mRNA_e_vs_nt.log2FoldChange	mRNA_e_vs_nt.padj	mRNA_h_vs_nt.log2FoldChange	mRNA_h_vs_nt.padj	ensembl
ENSG00000121410	A1BG	1	1.3722	NA	-0.270675	NA	0.479527	NA	1.99597	NA	0.505489	NA	0.535978	NA	-0.623776	NA	-0.776164	NA	-0.0564519	NA	ENSG00000121410
ENSG00000148584	A1CF	29974	1.37207	NA	0.691011	NA	1.4754	NA	1.99971	NA	0.74971	NA	2.15807	NA	-0.627637	NA	-0.0586991	NA	-0.682672	NA	ENSG00000148584
ENSG00000175899	A2M	2	-0.481392	0.594748	-0.416251	0.604976	-0.0928438	0.97496	1.43119	0.206696	0.307659	NA	0.678126	0.999548	-1.91259	4.25368e-05	-0.723909	0.133424	-0.770969	0.269908	ENSG00000175899
ENSG00000166535	A2ML1	144568	1.37197	NA	2.43292	NA	0.490069	NA	3.37218	NA	4.58549	NA	1.824	NA	-2.00021	NA	-2.15257	NA	-1.33393	NA	ENSG00000166535
ENSG00000184389	A3GALT2	127550	0.853665	NA	-0.836363	NA	1.7456	NA	0.132303	NA	-1.35171	NA	1.67165	NA	0.721362	NA	0.51535	NA	0.0739422	NA	ENSG00000184389
ENSG00000128274	A4GALT	53947	-0.313416	0.390648	-0.436507	0.200625	-0.00950311	0.993907	0.495061	0.39026	0.24629	0.744421	0.343021	0.999548	-0.808477	0.00187513	-0.682798	0.012081	-0.352524	0.445975	ENSG00000128274
ENSG00000118017	A4GNT	51146	3.18083	NA	0.690978	NA	0.490162	NA	3.80843	NA	1.47099	NA	0.451512	NA	-0.627596	NA	-0.780011	NA	0.0386501	NA	ENSG00000118017
ENSG00000094914	AAAS	8086	-6.84448e-05	0.999796	0.255732	0.183594	0.134825	0.798666	0.20234	0.578124	0.129831	0.76573	0.164354	0.999548	-0.202408	0.21765	0.125901	0.500959	-0.0295285	0.946029	ENSG00000094914
ENSG00000081760	AACS	65985	-0.324668	0.0996792	-0.190283	0.358293	-0.00414673	0.99593	0.225228	0.547324	0.134492	0.767001	0.156766	0.999548	-0.549897	0.000486978	-0.324774	0.0578561	-0.160913	0.611597	ENSG00000081760
ENSG00000114771	AADAC	13	-0.140332	0.939435	0.0813708	0.961588	0.806394	NA	1.5094	NA	0.871224	NA	1.73946	0.999548	-1.64973	0.166211	-0.789853	0.525716	-0.933065	NA	ENSG00000114771
ENSG00000197953	AADACL2	344752	1.37218	NA	0.691091	NA	0.490259	NA	0.557275	NA	0.749896	NA	0.451728	NA	0.814907	NA	-0.0588045	NA	0.0385318	NA	ENSG00000197953
ENSG00000188984	AADACL3	126767	1.37218	NA	0.691091	NA	0.490259	NA	0.557275	NA	0.749896	NA	0.451728	NA	0.814907	NA	-0.0588045	NA	0.0385318	NA	ENSG00000188984
ENSG00000204518	AADACL4	343066	1.37217	NA	0.691091	NA	0.490274	NA	1.27858	NA	0.749896	NA	-0.269582	NA	0.0935822	NA	-0.0588045	NA	0.759857	NA	ENSG00000204518
ENSG00000109576	AADAT	51166	0.442281	0.10078	0.102627	0.746733	0.239934	0.721586	-0.457298	0.30392	-0.568784	0.203138	-0.34323	0.999548	0.899579	1.45608e-05	0.671412	0.00218998	0.583164	0.0477509	ENSG00000109576
ENSG00000103591	AAGAB	79719	-0.15642	0.363137	-0.154801	0.358009	-0.181943	0.609457	-0.0229414	0.956466	-0.0330406	0.945784	-0.0598939	0.999548	-0.133479	0.369	-0.12176	0.44887	-0.122049	0.657797	ENSG00000103591
ENSG00000115977	AAK1	22848	-0.809085	0.000112803	-0.25082	0.286789	-0.277016	0.566378	-0.537259	0.125747	-0.117075	0.829909	0.115603	0.999548	-0.271826	0.176542	-0.133745	0.569178	-0.392619	0.165602	ENSG00000115977
ENSG00000087884	AAMDC	28971	-1.09841	0.00915426	-0.911935	0.026541	-0.452596	0.642941	-0.334217	0.711633	-0.0116037	0.992568	0.277239	0.999548	-0.764196	0.0333509	-0.900332	0.0138716	-0.729835	0.165572	ENSG00000087884
ENSG00000127837	AAMP	14	0.438201	0.00165724	0.342718	0.0169039	0.16509	0.634255	0.361668	0.109272	0.225183	0.419549	0.213534	0.999548	0.0765334	0.594803	0.117536	0.420486	-0.048444	0.879583	ENSG00000127837
ENSG00000129673	AANAT	15	-0.439717	NA	-0.159004	NA	1.11621	NA	1.04126	NA	-0.134501	NA	1.37943	NA	-1.48098	NA	-0.0245033	NA	-0.263221	NA	ENSG00000129673
ENSG00000131043	AAR2	25980	0.376393	0.0452438	0.584588	0.00104296	0.181372	0.705698	0.374327	0.223746	0.35654	0.284505	0.178907	0.999548	0.00206549	0.992199	0.228048	0.194755	0.00246431	0.996355	ENSG00000131043
ENSG00000205002	AARD	441376	1.37219	NA	0.691159	NA	0.490286	NA	1.27865	NA	-1.23406	NA	0.451793	NA	0.0935427	NA	1.92522	NA	0.0384924	NA	ENSG00000205002
ENSG00000090861	AARS1	16	-0.0566303	0.796686	-0.244824	0.182657	-0.147344	0.757527	0.202281	0.552796	-0.0539814	0.915455	0.0942387	0.999548	-0.258911	0.0873616	-0.190843	0.252804	-0.241583	0.306321	ENSG00000090861
ENSG00000124608	AARS2	57505	0.267971	0.317677	0.0368596	0.907412	-0.0775497	0.936859	0.652213	0.0767497	0.523574	0.211723	0.238583	0.999548	-0.384242	0.0615471	-0.486715	0.0194818	-0.316133	0.336031	ENSG00000124608
ENSG00000266967	AARSD1	80755	0.225501	0.672315	0.221966	0.663707	0.155126	0.928732	0.482471	0.67545	0.440291	0.722956	-0.342885	0.999548	-0.256969	0.706559	-0.218326	0.766399	0.498011	0.626571	ENSG00000266967
ENSG00000157426	AASDH	132949	-0.494271	0.0806478	-0.929959	0.000373968	-0.174708	0.82575	0.170116	0.778719	-0.35286	0.516091	0.00621736	0.999548	-0.664387	0.00282383	-0.577099	0.0126677	-0.180926	0.704373	ENSG00000157426
ENSG00000149313	AASDHPPT	60496	0.0191302	0.906988	0.0483051	0.751175	-0.123088	0.697038	0.00614581	0.986374	0.0749912	0.807196	-0.223371	0.999548	0.0129844	0.931295	-0.0266862	0.86346	0.100283	0.662075	ENSG00000149313
ENSG00000008311	AASS	10157	1.148	7.37567e-05	0.466071	0.148855	0.208377	0.824659	0.90094	0.0318158	0.346273	0.557497	-0.165793	0.999548	0.247064	0.296453	0.119798	0.667185	0.37417	0.271185	ENSG00000008311
ENSG00000275700	AATF	26574	0.675855	9.55222e-06	0.785731	2.3476e-07	0.209254	0.56434	0.306244	0.267497	0.290131	0.335622	0.0324379	0.999548	0.369611	0.00665572	0.4956	0.000293877	0.176817	0.473468	ENSG00000275700
ENSG00000181409	AATK	9625	0.144717	0.918371	0.446961	0.726257	0.256341	0.954933	2.26038	0.191509	2.18644	0.233991	0.989263	0.999548	-2.11566	0.0179413	-1.73948	0.0632206	-0.732922	0.687644	ENSG00000181409
ENSG00000183044	ABAT	18	1.37221	NA	0.691152	NA	0.49029	NA	0.557351	NA	-0.71492	NA	0.451804	NA	0.814861	NA	1.40607	NA	0.0384861	NA	ENSG00000183044
ENSG00000165029	ABCA1	19	-0.104507	0.865115	-0.314107	0.563203	-0.211796	0.894999	0.903625	0.264622	0.276942	0.810748	0.332629	0.999548	-1.00813	0.0148871	-0.591049	0.197392	-0.544425	0.451518	ENSG00000165029
ENSG00000154263	ABCA10	10349	-0.998772	0.239952	-0.886905	0.226299	-1.38941	0.289881	-0.413322	0.794663	-0.931139	NA	-1.8886	0.670753	-0.58545	0.248608	0.0442339	0.946118	0.499188	0.532739	ENSG00000154263
ENSG00000144452	ABCA12	26154	0.410457	NA	-0.270605	NA	-0.471441	NA	1.03826	NA	-1.87586	NA	-2.08833	NA	-0.627801	NA	1.60526	NA	1.61689	NA	ENSG00000144452
ENSG00000179869	ABCA13	154664	1.64235	0.295882	0.370408	0.840205	0.015034	0.998243	0.835353	NA	-1.23613	NA	-0.728556	0.999548	0.806994	0.744906	1.60654	0.476701	0.74359	0.888569	ENSG00000179869
ENSG00000107331	ABCA2	20	0.728905	0.0034981	0.0842489	0.792471	0.412757	0.425553	1.24489	0.000245289	0.814386	0.0401524	0.485827	0.999548	-0.515982	0.0148824	-0.730137	0.000557427	-0.0730705	0.896201	ENSG00000107331
ENSG00000167972	ABCA3	21	0.156349	0.958966	-2.41931	NA	-0.555035	NA	1.68949	NA	-0.0140837	NA	-0.219491	NA	-1.53314	NA	-2.40523	NA	-0.335544	NA	ENSG00000167972
ENSG00000198691	ABCA4	24	-0.416838	0.268869	-0.363038	0.302637	-0.135537	0.902953	0.559403	0.327734	0.162658	0.833942	0.00873382	0.999548	-0.976241	7.91928e-05	-0.525696	0.0448088	-0.144271	0.807498	ENSG00000198691
ENSG00000154265	ABCA5	23461	1.05053	0.00637894	1.02512	0.00692337	0.132841	0.933308	0.744761	0.241151	0.921312	0.146333	0.326463	0.999548	0.305767	0.365868	0.103808	0.803033	-0.193622	0.789782	ENSG00000154265
ENSG00000154262	ABCA6	23460	1.37197	NA	0.690897	NA	0.490102	NA	3.34463	NA	2.81594	NA	0.772283	NA	-1.97266	NA	-2.12505	NA	-0.282181	NA	ENSG00000154262
ENSG00000064687	ABCA7	10347	-0.302562	0.419794	-0.135056	0.735266	0.164535	0.876754	0.669504	0.213716	0.842548	0.113216	0.496964	0.999548	-0.972065	0.00017514	-0.977604	0.000233054	-0.332429	0.488509	ENSG00000064687
ENSG00000141338	ABCA8	10351	0.171155	0.727648	-0.808321	0.0609646	0.0911192	0.954933	1.22539	0.0233786	-0.140415	0.895979	-0.0396158	0.999548	-1.05424	7.71088e-05	-0.667906	0.0156521	0.130735	0.842267	ENSG00000141338
ENSG00000154258	ABCA9	10350	-2.06051	0.05241	-1.25902	0.122061	-0.385552	0.860576	-0.78936	0.682032	-1.08758	NA	0.0363637	0.999548	-1.27115	0.0378814	-0.171441	0.815596	-0.421916	0.727591	ENSG00000154258
ENSG00000085563	ABCB1	5243	0.815048	0.00352129	1.00077	0.00026207	0.103139	0.929906	1.05964	0.00878039	0.7372	0.119832	0.00818788	0.999548	-0.244588	0.358127	0.26357	0.34783	0.0949508	0.879602	ENSG00000085563
ENSG00000135776	ABCB10	23456	0.527457	0.0410387	0.154249	0.606025	0.254485	0.697285	0.634187	0.111238	0.362358	0.47174	0.298728	0.999548	-0.10673	0.678474	-0.208109	0.414083	-0.0442431	0.941647	ENSG00000135776
ENSG00000073734	ABCB11	8647	0.844981	0.773946	-1.70937	NA	0.389362	NA	3.44965	NA	-2.7675	NA	0.627472	NA	-2.60467	NA	1.05813	NA	-0.23811	NA	ENSG00000073734
ENSG00000005471	ABCB4	5244	0.614142	0.706725	-1.53826	NA	0.265293	NA	2.68827	NA	1.0929	NA	0.9318	0.999548	-2.07412	0.109113	-2.63116	0.064658	-0.666507	NA	ENSG00000005471
ENSG00000004846	ABCB5	340273	1.37211	NA	0.691016	NA	2.63805	NA	0.601623	NA	0.74974	NA	3.32073	NA	0.770482	NA	-0.0587246	NA	-0.68268	NA	ENSG00000004846
ENSG00000115657	ABCB6	10058	-0.0352122	0.924672	-0.19481	0.547216	0.267934	0.71548	0.717587	0.0984038	0.362307	0.522099	0.356259	0.999548	-0.752799	0.00102571	-0.557117	0.0228171	-0.0883243	0.885657	ENSG00000115657
ENSG00000131269	ABCB7	22	0.341782	0.21018	0.370068	0.169797	-0.0532409	0.962391	0.487369	0.258706	0.471243	0.314031	0.0804445	0.999548	-0.145588	0.563463	-0.101176	0.723602	-0.133685	0.794268	ENSG00000131269
ENSG00000197150	ABCB8	11194	-0.324757	0.278977	-0.266269	0.377779	0.0411901	0.973979	0.401904	0.418663	0.305967	0.589491	0.25268	0.999548	-0.726661	0.00110866	-0.572236	0.0151003	-0.21149	0.647808	ENSG00000197150
ENSG00000150967	ABCB9	23457	0.0644677	0.891089	-0.227727	0.569874	0.0586198	0.96886	0.487593	0.418981	0.341353	0.621101	0.345694	0.999548	-0.423126	0.099172	-0.56908	0.0280549	-0.287074	0.526312	ENSG00000150967
ENSG00000103222	ABCC1	4363	1.26687	9.08383e-11	0.803072	9.26336e-05	0.342192	0.431899	1.1146	8.98275e-05	0.840214	0.00908762	0.300329	0.999548	0.152279	0.456864	-0.0371415	0.883704	0.041863	0.933989	ENSG00000103222
ENSG00000124574	ABCC10	89845	0.681425	0.00339814	0.456883	0.0556931	0.343817	0.484778	0.675673	0.0488599	0.470906	0.23995	0.182637	0.999548	0.00575212	0.980634	-0.0140237	0.959318	0.16118	0.670972	ENSG00000124574
ENSG00000121270	ABCC11	85320	-0.816858	0.788068	-2.45974	NA	0.375611	NA	-2.16452	NA	-3.96984	NA	-1.83489	NA	1.34767	NA	1.5101	NA	2.2105	NA	ENSG00000121270
ENSG00000140798	ABCC12	94160	1.37218	NA	0.691138	NA	0.490275	NA	1.27863	NA	-0.748115	NA	0.451768	NA	0.0935579	NA	1.43925	NA	0.0385075	NA	ENSG00000140798
ENSG00000023839	ABCC2	1244	0.894334	2.32871e-07	0.496419	0.00701634	0.530254	0.0527589	0.82073	0.00114717	0.455239	0.146333	0.321439	0.999548	0.0736037	0.693735	0.0411791	0.84819	0.208815	0.444423	ENSG00000023839
ENSG00000108846	ABCC3	8714	0.977798	7.10062e-06	0.786913	0.000431141	0.14252	0.843807	1.03409	0.000995995	0.806601	0.0227	0.2923	0.999548	-0.0562932	0.817693	-0.0196889	0.944878	-0.14978	0.724512	ENSG00000108846
ENSG00000125257	ABCC4	10257	0.8786	6.94967e-06	0.917725	2.38464e-06	0.0201505	0.982794	0.623531	0.0421181	0.32515	0.412277	-0.0522543	0.999548	0.255069	0.1632	0.592575	0.000581878	0.0724048	0.872067	ENSG00000125257
ENSG00000114770	ABCC5	10057	0.951039	2.87828e-09	-0.00301156	0.990057	0.0658046	0.926457	0.68265	0.00348235	0.199529	0.574047	0.119337	0.999548	0.268389	0.052978	-0.202541	0.184903	-0.0535323	0.880943	ENSG00000114770
ENSG00000091262	ABCC6	368	-2.68829	0.0510584	-0.958548	0.288147	-0.607386	0.781625	-1.49883	0.482162	-0.314343	NA	-0.555786	0.999548	-1.18945	0.0515336	-0.644204	0.327745	-0.0515992	0.977256	ENSG00000091262
ENSG00000006071	ABCC8	6833	0.87922	0.283375	0.443619	0.604713	0.922563	0.529466	0.202734	0.903984	-1.09808	0.360759	0.545456	0.999548	0.676486	0.140014	1.5417	0.000224659	0.377108	0.686336	ENSG00000006071
ENSG00000069431	ABCC9	10060	-0.272142	0.84431	-1.11645	0.350311	0.584344	0.843247	0.44135	0.858039	0.147378	NA	0.174913	0.999548	-0.713492	0.447434	-1.26383	0.187383	0.409431	0.836542	ENSG00000069431
ENSG00000101986	ABCD1	215	-0.224572	0.320717	-0.306977	0.152157	0.291268	0.496899	-0.550477	0.0772965	-0.0953169	0.856294	0.186053	0.999548	0.325905	0.0618529	-0.21166	0.280392	0.105216	0.794361	ENSG00000101986
ENSG00000173208	ABCD2	225	-0.500315	NA	-0.219599	NA	-1.38222	NA	-0.593766	NA	-0.882003	NA	-1.42062	NA	0.093451	NA	0.662404	NA	0.0384007	NA	ENSG00000173208
ENSG00000117528	ABCD3	5825	-0.0518109	0.803969	-0.0948844	0.623273	-0.0894486	0.866154	-0.183655	0.577334	-0.0344371	0.946647	0.0565336	0.999548	0.131844	0.400956	-0.0604472	0.747672	-0.145982	0.593453	ENSG00000117528
ENSG00000119688	ABCD4	5826	0.701388	5.49802e-05	0.492658	0.0048901	-0.0232192	0.975946	0.839138	0.000340595	0.518544	0.0554734	-0.0351558	0.999548	-0.13775	0.361007	-0.0258865	0.892241	0.0119365	0.978722	ENSG00000119688
ENSG00000164163	ABCE1	6059	0.371938	0.0210148	0.574155	0.000209107	0.100059	0.842039	-0.132333	0.698984	0.0186674	0.970174	-0.0691781	0.999548	0.504271	0.000148365	0.555488	4.13278e-05	0.169237	0.498263	ENSG00000164163
ENSG00000204574	ABCF1	23	0.346317	0.022416	0.411113	0.00595713	0.074993	0.880317	-0.148747	0.633851	0.137063	0.686869	-0.00863036	0.999548	0.495064	5.97319e-05	0.274051	0.0423332	0.0836233	0.779826	ENSG00000204574
ENSG00000033050	ABCF2	10061	1.37219	NA	0.691121	NA	0.490287	NA	1.98501	NA	0.173734	NA	-0.39332	NA	-0.612814	NA	0.517386	NA	0.883607	NA	ENSG00000033050
ENSG00000161204	ABCF3	55324	0.557986	4.63668e-06	0.494268	6.23679e-05	0.0752435	0.855628	0.432784	0.0217487	0.436432	0.0293833	0.0580299	0.999548	0.125201	0.296259	0.0578357	0.684625	0.0172136	0.958981	ENSG00000161204
ENSG00000160179	ABCG1	9619	-0.467061	0.285252	-0.383819	0.388398	-0.00772678	0.996422	0.194691	0.840211	0.294191	0.763211	0.0317413	0.999548	-0.661751	0.0655615	-0.67801	0.0700691	-0.0394681	0.972303	ENSG00000160179
ENSG00000118777	ABCG2	9429	-0.139783	0.58749	-0.019556	0.947001	-0.239955	0.653442	0.199638	0.658194	0.158289	0.762559	0.0877636	0.999548	-0.339422	0.0732344	-0.177845	0.417222	-0.327719	0.256175	ENSG00000118777
ENSG00000172350	ABCG4	64137	1.37211	NA	0.691038	NA	0.490243	NA	1.9998	NA	1.47111	NA	-0.603552	NA	-0.627686	NA	-0.780072	NA	1.0938	NA	ENSG00000172350
ENSG00000138075	ABCG5	64240	1.3722	NA	0.691106	NA	0.490289	NA	0.557312	NA	0.749933	NA	-0.269545	NA	0.814885	NA	-0.058827	NA	0.759834	NA	ENSG00000138075
ENSG00000143994	ABHD1	84696	1.37219	NA	1.65286	NA	0.490254	NA	-0.149054	NA	1.71166	NA	0.451729	NA	1.52125	NA	-0.0587965	NA	0.0385247	NA	ENSG00000143994
ENSG00000144827	ABHD10	55347	-0.0629368	0.68902	-0.183402	0.177762	-0.0541498	0.906852	-0.0110983	0.976731	-0.094998	0.764141	-0.0120257	0.999548	-0.0518385	0.71071	-0.0884044	0.532239	-0.0421241	0.890261	ENSG00000144827
ENSG00000106077	ABHD11	83451	-1.03192	1.65363e-05	-0.568161	0.0212609	0.0464834	0.965577	-0.00620177	0.992537	0.11609	0.857394	0.111931	0.999548	-1.02572	6.41552e-07	-0.684252	0.00143437	-0.065448	0.907534	ENSG00000106077
ENSG00000100997	ABHD12	26090	0.21477	0.350817	0.120988	0.612211	0.191588	0.717988	0.245962	0.529773	0.141932	0.766263	0.160506	0.999548	-0.0311917	0.883419	-0.0209445	0.927757	0.0310816	0.946941	ENSG00000100997
ENSG00000131969	ABHD12B	145447	1.37211	NA	2.81511	NA	0.4902	NA	1.27847	NA	2.87382	NA	0.451613	NA	0.0936378	NA	-0.0587157	NA	0.0385874	NA	ENSG00000131969
ENSG00000139826	ABHD13	84945	0.296319	0.306536	0.301131	0.280315	-0.0927178	0.930223	-0.216703	0.688768	0.134512	0.831594	-0.118401	0.999548	0.513022	0.0144412	0.166619	0.518568	0.0256831	0.970159	ENSG00000139826
ENSG00000248487	ABHD14A	25864	0.0338689	0.948318	-0.0873933	0.846806	0.148434	0.903888	0.457496	0.495444	0.485612	0.468271	0.467511	0.999548	-0.423627	0.125116	-0.573006	0.0393268	-0.319077	0.50414	ENSG00000248487
ENSG00000114786	ABHD14A-ACY1	100526760	-1.36882	0.29748	-0.690245	0.56151	-0.944557	0.731002	-0.120085	NA	0.118403	NA	-1.36642	0.999548	-1.24874	0.190886	-0.808647	0.42969	0.421858	0.835188	ENSG00000114786
ENSG00000114779	ABHD14B	84836	-0.591397	0.0313548	-0.448669	0.112552	-0.22497	0.763494	0.138767	0.830597	0.0547798	0.949874	0.17086	0.999548	-0.730163	0.00130762	-0.503449	0.0391631	-0.39583	0.283078	ENSG00000114779
ENSG00000168792	ABHD15	116236	0.517353	0.0336374	0.271152	0.290513	0.366539	0.438433	0.406821	0.315398	0.200335	0.703224	0.3366	0.999548	0.110532	0.620247	0.070817	0.778556	0.0299389	0.95817	ENSG00000168792
ENSG00000204427	ABHD16A	7920	0.975	3.64025e-09	0.887448	9.68769e-08	0.204003	0.64219	0.948581	5.4843e-05	0.706275	0.00731361	0.279783	0.999548	0.0264195	0.891483	0.181172	0.284319	-0.0757807	0.838283	ENSG00000204427
ENSG00000183260	ABHD16B	140701	1.3722	NA	0.691121	NA	3.00174	NA	-0.162555	NA	-0.646575	NA	2.9632	NA	1.53475	NA	1.3377	NA	0.0385438	NA	ENSG00000183260
ENSG00000129968	ABHD17A	81926	0.0719328	0.957511	-1.31683	0.283977	-0.330245	0.920867	0.643647	0.67218	-1.02747	0.568535	-0.138722	0.999548	-0.571714	0.00569117	-0.28936	0.210362	-0.191523	0.645155	ENSG00000129968
ENSG00000107362	ABHD17B	51104	-0.308541	0.0704215	-0.0961741	0.614529	-0.218166	0.536182	-0.705368	0.0024278	-0.302893	0.324365	-0.295232	0.999548	0.396827	0.00593133	0.206719	0.208746	0.0770667	0.834866	ENSG00000107362
ENSG00000136379	ABHD17C	58489	-0.0604837	0.778213	0.0100566	0.964236	0.181092	0.648546	-0.498511	0.054535	-0.32213	0.293434	-0.248651	0.999548	0.438028	0.0025537	0.332186	0.0321519	0.429743	0.0277571	ENSG00000136379
ENSG00000164074	ABHD18	80167	0.0156387	0.957711	-0.0938362	0.697439	-0.217366	0.65601	0.216535	0.61544	0.175198	0.712444	0.0113801	0.999548	-0.200897	0.317515	-0.269034	0.188732	-0.228746	0.489277	ENSG00000164074
ENSG00000140526	ABHD2	11057	1.11892	6.54339e-08	0.772889	0.000320862	-0.182167	0.772787	1.09433	0.000329656	0.268785	0.564852	0.0138214	0.999548	0.0245861	0.92477	0.504105	0.0113237	-0.195989	0.613786	ENSG00000140526
ENSG00000158201	ABHD3	171586	0.203371	0.247004	0.0109589	0.960787	-0.277146	0.389903	0.380761	0.143909	0.168188	0.632215	0.0921129	0.999548	-0.17739	0.236333	-0.157229	0.332145	-0.369259	0.0531625	ENSG00000158201
ENSG00000100439	ABHD4	63874	-0.190267	0.331935	-0.62676	0.000222554	-0.0325863	0.966429	0.540496	0.0402438	0.392479	0.205984	0.273949	0.999548	-0.730763	3.78475e-07	-1.01924	1.34676e-12	-0.306535	0.170823	ENSG00000100439
ENSG00000011198	ABHD5	51099	0.00187002	0.992131	-0.308926	0.0100257	-0.425383	0.00717214	-0.0989224	0.706446	-0.103937	0.712542	-0.245693	0.999548	0.100792	0.386781	-0.204988	0.0693308	-0.179691	0.286346	ENSG00000011198
ENSG00000163686	ABHD6	57406	0.328275	0.16875	0.218569	0.375036	0.190704	0.755641	0.1505	0.760284	0.015967	0.98234	-8.33693e-05	0.999808	0.177775	0.396451	0.202602	0.355533	0.190787	0.60298	ENSG00000163686
ENSG00000127220	ABHD8	79575	-0.817594	0.0248978	-0.854338	0.0152567	-0.495011	0.504281	-0.13218	0.878381	0.0558694	0.961581	-0.0788523	0.999548	-0.685413	0.0176606	-0.910208	0.00177723	-0.416159	0.391444	ENSG00000127220
ENSG00000136754	ABI1	10006	-0.24926	0.121623	-0.00999025	0.961346	-0.257789	0.387817	-0.281793	0.287858	-0.303848	0.263295	-0.140535	0.999548	0.0325331	0.845649	0.293858	0.0311927	-0.117254	0.668833	ENSG00000136754
ENSG00000138443	ABI2	10152	-0.336728	0.113547	-0.378666	0.0650975	-0.100444	0.878002	-0.0703803	0.887694	-0.196945	0.650977	0.00233848	0.999548	-0.266348	0.133073	-0.181721	0.356968	-0.102782	0.797736	ENSG00000138443
ENSG00000108798	ABI3	51225	1.37207	NA	0.690963	NA	0.490146	NA	1.39341	NA	2.26283	NA	1.24335	NA	-0.0213402	NA	-1.57187	NA	-0.753207	NA	ENSG00000108798
ENSG00000154175	ABI3BP	25890	-2.77986	0.222919	-1.52792	NA	-0.0216862	NA	-1.90555	NA	-2.3155	NA	0.242833	NA	-0.874309	NA	0.787584	NA	-0.264519	NA	ENSG00000154175
ENSG00000119328	ABITRAM	54942	0.291276	0.360849	-0.0351571	0.925785	0.288839	0.685928	-0.355268	0.522421	-0.244793	0.709385	0.00453924	0.999548	0.646544	0.00701906	0.209635	0.477932	0.284299	0.526454	ENSG00000119328
ENSG00000097007	ABL1	25	-0.0983011	0.488637	0.34938	0.00286272	0.011784	0.9824	-0.523062	0.00155485	-0.0454436	0.890131	-0.174169	0.999548	0.424761	7.21143e-06	0.394824	5.16878e-05	0.185953	0.221082	ENSG00000097007
ENSG00000143322	ABL2	27	0.404878	0.0218946	0.567909	0.00079905	-0.0524745	0.942181	-0.375613	0.196697	-0.0800802	0.862578	-0.153598	0.999548	0.780491	5.44445e-08	0.647989	1.27021e-05	0.101123	0.776442	ENSG00000143322
ENSG00000099204	ABLIM1	3983	-0.418061	0.0153304	-0.398371	0.0205523	0.0109603	0.987891	-0.565588	0.0247882	-0.720592	0.00445782	-0.282847	0.999548	0.147528	0.359327	0.322221	0.0346374	0.293808	0.175884	ENSG00000099204
ENSG00000163995	ABLIM2	84448	-3.06162	0.118702	-0.0386125	NA	-0.210653	NA	0.250859	NA	1.72555	NA	0.694282	0.999548	-3.31248	0.042738	-1.76416	0.260767	-0.904936	NA	ENSG00000163995
ENSG00000173210	ABLIM3	22885	-1.23417	0.000313098	-0.945903	0.00513826	-0.600678	0.360593	-0.027854	0.978069	-0.136109	0.885341	-0.24313	0.999548	-1.20632	1.22138e-05	-0.809794	0.0052831	-0.357548	0.482736	ENSG00000173210
ENSG00000175164	ABO	28	3.70719	NA	1.65278	NA	0.490176	NA	3.6135	NA	1.7115	NA	0.45157	NA	0.0936926	NA	-0.0587155	NA	0.0386057	NA	ENSG00000175164
ENSG00000159842	ABR	29	-0.310203	0.101891	-0.403235	0.0247129	-0.211479	0.609996	0.249723	0.456245	-0.0501591	0.92298	0.0164038	0.999548	-0.559926	9.50851e-05	-0.353076	0.0216774	-0.227883	0.349318	ENSG00000159842
ENSG00000146386	ABRACL	58527	-0.582841	0.00151439	-0.799657	6.76243e-06	-0.286967	0.452423	-0.514072	0.0814915	-0.562357	0.0675274	-0.296436	0.999548	-0.0687696	0.733354	-0.237299	0.20285	0.00946839	0.985965	ENSG00000146386
ENSG00000163322	ABRAXAS1	84142	-0.792308	0.0102646	-0.395248	0.204505	0.145924	0.876434	0.399313	0.515442	0.763364	0.134137	0.513408	0.999548	-1.19162	4.97224e-06	-1.15861	1.08235e-05	-0.367484	0.402843	ENSG00000163322
ENSG00000165660	ABRAXAS2	23172	0.581086	2.33659e-05	0.493556	0.000358489	0.105375	0.803784	0.400768	0.0749973	0.592429	0.006558	0.106945	0.999548	0.180318	0.178247	-0.0988726	0.5257	-0.00156963	0.99699	ENSG00000165660
ENSG00000146109	ABT1	29777	0.343637	0.00565519	0.502609	1.90661e-05	0.120815	0.710666	0.11722	0.655867	0.345747	0.0914512	-0.0351633	0.999548	0.226417	0.0384927	0.156862	0.193215	0.155978	0.395368	ENSG00000146109
ENSG00000114626	ABTB1	80325	-1.10522	0.000131374	-1.6364	3.98248e-09	-0.776842	0.051931	-0.22825	0.708701	-0.211966	0.757781	0.192643	0.999548	-0.876973	3.68689e-05	-1.42443	3.71642e-11	-0.969485	0.00014007	ENSG00000114626
ENSG00000166016	ABTB2	25841	0.12173	0.691863	0.632106	0.0108058	0.421405	0.398536	-0.734375	0.0509573	-0.129958	0.834548	-0.0875012	0.999548	0.856105	1.97667e-05	0.762065	0.000245069	0.508906	0.0833623	ENSG00000166016
ENSG00000060971	ACAA1	30	-0.111836	0.508874	-0.31862	0.0294782	0.0268126	0.966709	0.112618	0.719897	-0.0266927	0.955171	0.0818054	0.999548	-0.224454	0.0800508	-0.291927	0.0244483	-0.0549928	0.862821	ENSG00000060971
ENSG00000167315	ACAA2	10449	0.00811304	0.957711	0.0694263	0.573702	-0.120408	0.640953	0.0199423	0.944399	0.113997	0.616324	-0.0328942	0.999548	-0.0118293	0.922493	-0.0445706	0.710744	-0.0875143	0.634098	ENSG00000167315
ENSG00000278540	ACACA	31	0.116505	0.614612	0.204055	0.343568	0.220053	0.644515	0.0519862	0.917917	0.0607466	0.915776	0.102179	0.999548	0.0645187	0.751775	0.143309	0.475721	0.117874	0.753685	ENSG00000278540
ENSG00000076555	ACACB	32	-0.318878	0.403839	-1.19859	0.000322675	-0.336879	0.6827	0.777528	0.139708	-0.0178818	0.985643	0.103835	0.999548	-1.09641	2.31647e-05	-1.18071	7.26084e-06	-0.440714	0.298183	ENSG00000076555
ENSG00000111271	ACAD10	80724	-0.468191	0.123954	-0.377596	0.195776	0.0800685	0.94208	0.442568	0.368664	0.243337	0.682621	0.2018	0.999548	-0.910759	1.27933e-05	-0.620934	0.0044893	-0.121731	0.813563	ENSG00000111271
ENSG00000240303	ACAD11	84129	0.147228	0.541726	-0.122287	0.609228	0.141536	0.811082	0.230267	0.585617	-0.087959	0.874321	-0.0490923	0.999548	-0.0830387	0.704688	-0.0343281	0.892241	0.190629	0.576449	ENSG00000240303
ENSG00000151498	ACAD8	27034	-0.207467	0.249063	-0.293189	0.0759197	0.109094	0.813434	-0.0881289	0.825375	-0.0939256	0.816977	0.0471436	0.999548	-0.119338	0.475056	-0.199263	0.229144	0.0619501	0.869206	ENSG00000151498
ENSG00000177646	ACAD9	28976	0.0602231	0.650191	0.0873768	0.480873	0.108062	0.701773	0.0115578	0.96999	-0.0924396	0.713386	0.0277699	0.999548	0.0486652	0.663283	0.179816	0.0701026	0.0802916	0.679815	ENSG00000177646
ENSG00000115361	ACADL	33	-0.405897	0.23133	-0.226916	0.524961	0.160326	0.8736	-0.144859	0.846524	-0.071018	0.942608	-0.0666129	0.999548	-0.261038	0.379892	-0.155898	0.648048	0.226939	0.68485	ENSG00000115361
ENSG00000117054	ACADM	34	-0.804095	9.50013e-06	-0.496454	0.00941628	-0.199088	0.682624	-0.222209	0.564571	-0.0994622	0.838118	-0.140962	0.999548	-0.581886	0.000283601	-0.396992	0.0207634	-0.0581265	0.89401	ENSG00000117054
ENSG00000122971	ACADS	35	-0.966657	0.00107192	-0.706539	0.0185813	-0.304469	0.687726	0.456134	0.417512	0.165878	0.824423	0.311263	0.999548	-1.42279	1.11913e-08	-0.872417	0.00074053	-0.615732	0.0919032	ENSG00000122971
ENSG00000196177	ACADSB	36	-0.846327	0.00522358	-0.725158	0.0149111	-0.47979	0.423272	-0.214253	0.762802	0.105905	0.908455	0.0659353	0.999548	-0.632073	0.0291656	-0.831064	0.00461473	-0.545726	0.207477	ENSG00000196177
ENSG00000072778	ACADVL	37	0.0909035	0.677493	-0.0558086	0.806129	-0.0151511	0.984566	0.321883	0.30518	0.0390602	0.945766	0.0253304	0.999548	-0.230979	0.154914	-0.0948688	0.628452	-0.0404815	0.922385	ENSG00000072778
ENSG00000157766	ACAN	176	0.668163	NA	-0.974689	NA	-0.225808	NA	0.574666	NA	-0.915784	NA	-0.98558	NA	0.093497	NA	-0.0589047	NA	0.759771	NA	ENSG00000157766
ENSG00000072818	ACAP1	9744	-0.430784	0.718471	-1.58965	0.151167	-0.347296	0.921018	-0.625827	NA	-1.15384	NA	-0.980952	0.999548	0.195043	0.851949	-0.43581	0.693958	0.633656	0.71071	ENSG00000072818
ENSG00000114331	ACAP2	23527	0.0273135	0.919073	-0.0182462	0.946913	-0.110795	0.864673	-0.340539	0.340684	-0.183218	0.689461	-0.0136573	0.999548	0.367853	0.0378941	0.164972	0.430578	-0.0971379	0.822084	ENSG00000114331
ENSG00000131584	ACAP3	116983	-0.898761	0.0034887	-0.454488	0.160858	0.167185	0.86444	-0.346864	0.57491	-0.228696	0.754491	0.315065	0.999548	-0.551897	0.0317768	-0.225793	0.459495	-0.147879	0.808904	ENSG00000131584
ENSG00000075239	ACAT1	38	-0.26425	0.0182873	0.0816305	0.521073	-0.0903876	0.768634	-0.0254708	0.931973	0.154922	0.488945	0.00828736	0.999548	-0.238779	0.0141621	-0.0732913	0.538029	-0.098675	0.602355	ENSG00000075239
ENSG00000120437	ACAT2	39	0.0881369	0.641282	-0.163466	0.350321	-0.136687	0.755675	0.489185	0.0373683	0.304509	0.291046	0.0700609	0.999548	-0.401048	0.00247191	-0.467975	0.000517447	-0.206748	0.354414	ENSG00000120437
ENSG00000182827	ACBD3	64746	0.457424	0.000133274	0.315918	0.0113125	0.0171014	0.975223	0.10519	0.697446	0.235842	0.31526	0.0731804	0.999548	0.352234	0.00115033	0.0800759	0.562213	-0.056079	0.842884	ENSG00000182827
ENSG00000181513	ACBD4	79777	-2.02716	2.63437e-06	-1.4906	0.000232372	-0.339291	0.758966	-1.09981	0.109995	-0.932484	0.194146	0.0663167	0.999548	-0.927351	0.00663543	-0.558118	0.136169	-0.405608	0.514519	ENSG00000181513
ENSG00000107897	ACBD5	91452	-0.0210983	0.920773	-0.176178	0.309828	-0.255741	0.425553	-0.0716218	0.851976	-0.152941	0.666769	-0.119409	0.999548	0.0505235	0.765905	-0.0232373	0.904946	-0.136332	0.616975	ENSG00000107897
ENSG00000230124	ACBD6	84320	0.122196	0.372574	0.24357	0.0465977	0.214243	0.357617	-0.383189	0.0332921	-0.282624	0.174536	-0.0962305	0.999548	0.505385	2.56641e-07	0.526194	1.19706e-07	0.310473	0.0211197	ENSG00000230124
ENSG00000176244	ACBD7	414149	0.410459	NA	0.691146	NA	0.513679	NA	-0.404386	NA	0.75	NA	-0.24613	NA	0.814844	NA	-0.0588538	NA	0.759809	NA	ENSG00000176244
ENSG00000110455	ACCS	84680	-2.38038	7.24472e-05	-1.20403	0.0127774	-0.122592	0.946925	-1.00918	0.302782	-0.397633	0.712563	0.142486	0.999548	-1.3712	0.000346401	-0.806396	0.0428349	-0.265079	0.752178	ENSG00000110455
ENSG00000205126	ACCSL	390110	1.37215	NA	1.65286	NA	0.490239	NA	1.27855	NA	0.990312	NA	0.451692	NA	0.0935972	NA	0.662551	NA	0.0385468	NA	ENSG00000205126
ENSG00000102977	ACD	65057	-0.965185	8.40828e-05	-0.900839	0.000272711	-0.0248188	0.982693	0.345975	0.480178	0.201018	0.742924	0.32929	0.999548	-1.31116	1.66251e-10	-1.10186	1.67236e-07	-0.354109	0.313084	ENSG00000102977
ENSG00000159640	ACE	1636	-1.8956	0.483315	-0.0014466	NA	-2.77752	NA	-1.15089	NA	1.22341	NA	-3.50531	NA	-0.744713	NA	-1.22485	NA	0.727792	NA	ENSG00000159640
ENSG00000130234	ACE2	59272	0.909793	0.110194	0.352374	0.577723	-0.395447	0.81419	0.494398	0.683374	-0.0413049	NA	0.132256	0.999548	0.415396	0.482488	0.393679	0.534104	-0.527703	0.64593	ENSG00000130234
ENSG00000177076	ACER2	340485	0.448809	0.767236	0.746936	0.57475	-0.157668	NA	0.919693	NA	0.716547	NA	0.0910712	0.999548	-0.470884	0.723095	0.030389	0.984425	-0.248739	NA	ENSG00000177076
ENSG00000078124	ACER3	55331	0.502954	0.0632778	0.613835	0.0177722	0.0910899	0.931648	-0.123471	0.845197	0.0953131	0.899	0.168782	0.999548	0.626425	0.00528264	0.518521	0.0294107	-0.077692	0.900255	ENSG00000078124
ENSG00000087085	ACHE	43	-0.118947	0.973927	1.38796	NA	0.811055	NA	-0.654068	NA	1.09922	NA	0.829186	NA	0.535121	NA	0.288738	NA	-0.018131	NA	ENSG00000087085
ENSG00000100813	ACIN1	22985	-0.154835	0.326397	-0.0483207	0.78594	0.255509	0.35324	-0.0137436	0.972703	0.182234	0.52847	0.19969	0.999548	-0.141092	0.28089	-0.230555	0.0748381	0.0558188	0.855181	ENSG00000100813
ENSG00000144648	ACKR2	1238	2.14665	NA	3.19637	NA	0.34578	NA	1.33172	NA	3.25514	NA	0.307237	NA	0.814931	NA	-0.058769	NA	0.0385431	NA	ENSG00000144648
ENSG00000129048	ACKR4	51554	1.37217	NA	0.691106	NA	0.490259	NA	1.27858	NA	0.0285857	NA	0.451728	NA	0.0935822	NA	0.66252	NA	0.0385318	NA	ENSG00000129048
ENSG00000131473	ACLY	47	0.452429	0.00464496	-0.163234	0.369143	0.230173	0.511491	0.269947	0.349401	0.17486	0.616933	0.141361	0.999548	0.182482	0.219315	-0.338094	0.0192599	0.0888119	0.785011	ENSG00000131473
ENSG00000122729	ACO1	48	-0.587349	0.00390785	-0.196488	0.393661	-0.0217532	0.981123	-0.0892185	0.858697	0.0288767	0.965903	0.0880157	0.999548	-0.498131	0.00424015	-0.225365	0.262214	-0.109769	0.791807	ENSG00000122729
ENSG00000100412	ACO2	50	0.244978	0.399586	0.431066	0.108572	0.0467203	0.968053	0.572061	0.171815	0.583374	0.193231	0.139033	0.999548	-0.327083	0.154105	-0.152308	0.57496	-0.0923124	0.869988	ENSG00000100412
ENSG00000184227	ACOT1	641371	0.0917379	0.892384	-0.272889	0.643784	-0.18278	0.925457	1.0994	0.177268	0.560092	0.581985	0.551684	0.999548	-1.00766	0.0147743	-0.832981	0.0499595	-0.734464	0.236666	ENSG00000184227
ENSG00000162390	ACOT11	26027	-0.567884	0.198098	-0.664944	0.0979037	-0.26791	0.804816	0.00960818	0.992537	-0.674323	0.327643	0.269185	0.999548	-0.577493	0.072724	0.00937897	0.984069	-0.537095	0.275343	ENSG00000162390
ENSG00000172497	ACOT12	134526	1.3721	NA	3.3418	NA	0.490189	NA	1.27845	NA	3.4005	NA	0.451593	NA	0.093646	NA	-0.0586993	NA	0.0385957	NA	ENSG00000172497
ENSG00000112304	ACOT13	55856	-1.08439	3.44209e-07	-0.864775	7.35434e-05	-0.277952	0.595391	-0.48823	0.192559	-0.358292	0.418324	-0.0541866	0.999548	-0.596165	0.00172474	-0.506482	0.0112671	-0.223766	0.532072	ENSG00000112304
ENSG00000119673	ACOT2	10965	0.356751	0.122224	0.857529	1.90661e-05	0.260296	0.596877	0.385107	0.30508	0.626202	0.0639283	0.396611	0.999548	-0.0283557	0.905202	0.231327	0.255428	-0.136315	0.733303	ENSG00000119673
ENSG00000177465	ACOT4	122970	0.205195	0.55366	-0.00110622	0.997548	0.190234	0.825245	0.172695	0.795065	0.273771	0.668426	0.285703	0.999548	0.0325002	0.919692	-0.274877	0.335809	-0.0954684	0.881299	ENSG00000177465
ENSG00000205669	ACOT6	641372	1.37229	NA	0.691201	NA	-0.471437	NA	-0.701243	NA	-0.753485	NA	-0.509878	NA	2.07353	NA	1.44469	NA	0.0384409	NA	ENSG00000205669
ENSG00000097021	ACOT7	11332	0.0831803	0.674574	-0.176055	0.330699	0.130026	0.7797	0.153993	0.652578	0.118566	0.765505	0.214008	0.999548	-0.0708123	0.674901	-0.294621	0.0477909	-0.0839813	0.803977	ENSG00000097021
ENSG00000101473	ACOT8	10005	-0.456241	0.037999	-0.408015	0.0617225	0.0888471	0.907833	-0.0877265	0.86609	-0.331799	0.419549	0.176159	0.999548	-0.368514	0.0440819	-0.0762165	0.749318	-0.0873123	0.847452	ENSG00000101473
ENSG00000123130	ACOT9	23597	-0.241516	0.0445327	0.0235782	0.873899	-0.329351	0.0579059	0.0982998	0.696939	-0.0697636	0.807184	-0.15218	0.999548	-0.339816	0.000648715	0.0933418	0.441592	-0.177171	0.271071	ENSG00000123130
ENSG00000161533	ACOX1	51	-0.080437	0.702388	-0.146818	0.451106	-0.0986236	0.859505	-0.0823353	0.844539	-0.116418	0.786066	-0.0640907	0.999548	0.00189831	0.99269	-0.0304	0.887318	-0.0345329	0.936158	ENSG00000161533
ENSG00000168306	ACOX2	8309	0.052482	0.983184	-0.485331	NA	0.432487	NA	-1.72826	NA	-2.45648	NA	-2.37208	NA	1.78074	NA	1.97115	NA	2.80456	NA	ENSG00000168306
ENSG00000087008	ACOX3	8310	-0.372678	0.0515337	-0.230479	0.233476	0.0455238	0.953722	0.30527	0.356422	0.407015	0.199015	0.244461	0.999548	-0.677947	6.92441e-06	-0.637494	3.32951e-05	-0.198937	0.468634	ENSG00000087008
ENSG00000153093	ACOXL	55289	-0.489167	NA	-1.17023	NA	-1.37107	NA	1.50029	NA	-0.492245	NA	-0.0479032	NA	-1.98946	NA	-0.677984	NA	-1.32317	NA	ENSG00000153093
ENSG00000143727	ACP1	52	0.163981	0.537295	0.183174	0.479412	-0.00786977	0.993907	0.0746816	0.896279	-0.00751861	0.991517	0.0513777	0.999548	0.0892997	0.703623	0.190692	0.407743	-0.0592475	0.909261	ENSG00000143727
ENSG00000134575	ACP2	53	1.24561	7.89618e-12	1.06215	1.0317e-08	0.347593	0.382528	1.19703	3.81857e-06	0.941281	0.000968228	0.355017	0.999548	0.0485865	0.817028	0.120872	0.558158	-0.00742315	0.988657	ENSG00000134575
ENSG00000014257	ACP3	55	-2.21802	0.0145303	-0.882115	0.251673	-0.249605	0.928566	0.992754	0.572757	1.2637	NA	0.893847	0.999548	-3.21077	1.83522e-06	-2.14582	0.000430209	-1.14345	0.186099	ENSG00000014257
ENSG00000102575	ACP5	54	1.37205	NA	0.69097	NA	1.98547	NA	1.99965	NA	1.47096	NA	2.66811	NA	-0.627607	NA	-0.779994	NA	-0.682634	NA	ENSG00000102575
ENSG00000162836	ACP6	51205	0.00674851	0.982815	-0.0241994	0.930821	0.1549	0.798382	0.212588	0.622279	-0.0661713	0.913826	0.103282	0.999548	-0.20584	0.279032	0.0419719	0.863123	0.0516183	0.912504	ENSG00000162836
ENSG00000183760	ACP7	390928	1.37218	NA	0.691091	NA	0.490259	NA	0.557275	NA	0.749896	NA	0.451728	NA	0.814907	NA	-0.0588045	NA	0.0385318	NA	ENSG00000183760
ENSG00000100312	ACR	49	1.37217	NA	0.691106	NA	0.490259	NA	1.27858	NA	0.0285857	NA	0.451728	NA	0.0935822	NA	0.66252	NA	0.0385318	NA	ENSG00000100312
ENSG00000111644	ACRBP	84519	0.568715	NA	-0.112369	NA	0.68496	NA	2.25404	NA	0.757141	NA	0.184888	NA	-1.68532	NA	-0.86951	NA	0.500072	NA	ENSG00000111644
ENSG00000134940	ACRV1	56	1.37217	NA	0.691106	NA	0.490259	NA	1.27858	NA	0.0285857	NA	0.451728	NA	0.0935822	NA	0.66252	NA	0.0385318	NA	ENSG00000134940
ENSG00000103740	ACSBG1	23205	2.33398	NA	0.691113	NA	0.49027	NA	1.52051	NA	0.0738984	NA	0.451724	NA	0.813465	NA	0.617214	NA	0.038546	NA	ENSG00000103740
ENSG00000130377	ACSBG2	81616	3.70767	NA	1.65274	NA	0.490131	NA	3.61392	NA	2.43273	NA	1.17279	NA	0.0937464	NA	-0.779986	NA	-0.682663	NA	ENSG00000130377
ENSG00000167107	ACSF2	80221	-0.0702711	0.926017	-0.270306	0.694707	-0.0983494	0.969883	0.760871	0.47962	0.527894	0.677868	0.333051	0.999548	-0.831142	0.0943918	-0.7982	0.129636	-0.4314	0.66255	ENSG00000167107
ENSG00000176715	ACSF3	197322	-0.120802	0.586992	0.0352038	0.879175	0.136011	0.792435	0.0366483	0.940296	-0.0448089	0.935533	0.211167	0.999548	-0.15745	0.347993	0.0800127	0.681363	-0.0751565	0.845507	ENSG00000176715
ENSG00000151726	ACSL1	2180	-0.393687	0.0633078	-0.697253	0.000456054	-0.0153547	0.984965	-0.143858	0.753868	-0.227447	0.606586	0.0372589	0.999548	-0.249829	0.189158	-0.469806	0.0109533	-0.0526137	0.912504	ENSG00000151726
ENSG00000123983	ACSL3	2181	1.09574	2.4797e-07	0.692438	0.00194707	0.290013	0.573288	0.393379	0.321826	0.114922	0.843096	-0.0842796	0.999548	0.702364	0.000184621	0.577516	0.00344588	0.374292	0.205804	ENSG00000123983
ENSG00000068366	ACSL4	2182	0.519455	0.0715771	0.251203	0.425799	0.0958694	0.933308	-0.412224	0.422437	-0.210049	0.756457	-0.282529	0.999548	0.931679	5.17528e-05	0.461252	0.0717924	0.378399	0.334458	ENSG00000068366
ENSG00000197142	ACSL5	51703	0.68637	0.00547764	0.349036	0.188556	-0.0601761	0.955998	0.582513	0.13985	0.222837	0.686956	-0.24539	0.999548	0.103857	0.674116	0.126199	0.628172	0.185214	0.661717	ENSG00000197142
ENSG00000166743	ACSM1	116285	1.37208	NA	0.691001	NA	0.490169	NA	1.99971	NA	1.47102	NA	1.17285	NA	-0.62763	NA	-0.780017	NA	-0.682681	NA	ENSG00000166743
ENSG00000183747	ACSM2A	123876	2.33389	NA	0.691036	NA	1.47544	NA	2.24024	NA	0.749787	NA	1.43684	NA	0.0936501	NA	-0.0587516	NA	0.0386001	NA	ENSG00000183747
ENSG00000005187	ACSM3	6296	-1.18821	NA	-1.86928	NA	0.409052	NA	0.133567	NA	-1.88284	NA	0.152107	NA	-1.32177	NA	0.0135572	NA	0.256945	NA	ENSG00000005187
ENSG00000215009	ACSM4	341392	1.37221	NA	-0.27064	NA	-0.471472	NA	1.27865	NA	-0.211798	NA	-0.509967	NA	0.0935596	NA	-0.058842	NA	0.0384943	NA	ENSG00000215009
ENSG00000173124	ACSM6	142827	-0.874931	NA	-1.55601	NA	-1.75684	NA	-0.247125	NA	-0.775814	NA	-1.07398	NA	-0.627806	NA	-0.780192	NA	-0.682856	NA	ENSG00000173124
ENSG00000154930	ACSS1	84532	2.33397	NA	0.691089	NA	1.44129	NA	2.20112	NA	1.47634	NA	2.1292	NA	0.132847	NA	-0.78525	NA	-0.687905	NA	ENSG00000154930
ENSG00000131069	ACSS2	55902	-0.843453	0.00390618	-1.06579	0.000212763	-0.210131	0.811407	0.253414	0.687876	0.102139	0.906019	0.162383	0.999548	-1.09687	6.31981e-06	-1.16793	2.31702e-06	-0.372514	0.381453	ENSG00000131069
ENSG00000111058	ACSS3	79611	1.37218	NA	3.71555	NA	3.81304	NA	1.27857	NA	3.05297	NA	3.05311	NA	0.0936072	NA	0.66258	NA	0.759922	NA	ENSG00000111058
ENSG00000143632	ACTA1	58	1.14613	0.0281475	1.29138	0.0103857	1.16694	0.16433	0.731765	0.496988	1.39903	0.141486	1.49575	0.999548	0.414361	0.483796	-0.107651	0.885909	-0.328808	0.8035	ENSG00000143632
ENSG00000107796	ACTA2	59	-0.898373	0.0237653	-0.452005	0.25519	0.200714	0.860576	0.381562	0.648227	0.133099	0.902059	0.394491	0.999548	-1.27994	0.000146241	-0.585104	0.0995885	-0.193777	0.802211	ENSG00000107796
ENSG00000075624	ACTB	60	0.26655	0.166912	0.153072	0.458275	0.0692098	0.925278	0.198013	0.591044	0.110407	0.804687	0.120084	0.999548	0.0685371	0.714389	0.0426653	0.841944	-0.0508743	0.901686	ENSG00000075624
ENSG00000169067	ACTBL2	345651	1.64147	0.07017	1.40845	0.121514	1.02855	0.621267	4.3178	NA	2.79366	NA	1.00052	0.999548	-2.67633	0.0948706	-1.38521	0.454243	0.0280335	0.994564	ENSG00000169067
ENSG00000159251	ACTC1	70	0.432208	0.506036	0.486161	0.423523	-0.291182	0.8732	0.196653	0.888521	0.31938	0.8145	0.294698	0.999548	0.235555	0.6887	0.16678	0.800491	-0.58588	0.540765	ENSG00000159251
ENSG00000184009	ACTG1	71	0.374073	0.0918172	0.400732	0.0697251	0.0587543	0.94827	0.0468805	0.934794	0.0823396	0.890532	-0.0515061	0.999548	0.327192	0.0811949	0.318393	0.10791	0.11026	0.799511	ENSG00000184009
ENSG00000163017	ACTG2	72	0.265189	0.734253	0.583745	0.398248	0.131299	0.962355	0.426962	0.77614	0.508619	0.746504	0.76783	0.999548	-0.161772	0.834742	0.0751257	0.929339	-0.636532	0.606514	ENSG00000163017
ENSG00000288649	ACTL10	170487	0.262195	0.686336	0.347048	0.560355	0.659295	0.552209	-0.178301	0.892939	-0.0554909	0.971798	0.3389	0.999548	0.440496	0.363898	0.402539	0.442905	0.320396	0.746084	ENSG00000288649
ENSG00000136518	ACTL6A	86	-0.124965	0.431413	-0.234576	0.107707	-0.110277	0.781625	-0.374603	0.0830016	-0.48124	0.026613	-0.271916	0.999548	0.249638	0.0391719	0.246664	0.0508775	0.161639	0.440435	ENSG00000136518
ENSG00000077080	ACTL6B	51412	2.37534	0.19566	1.55462	NA	1.21192	NA	1.56042	NA	1.61342	NA	1.17338	0.999548	0.814927	0.752716	-0.0588001	0.984755	0.0385415	NA	ENSG00000077080
ENSG00000148156	ACTL7B	10880	-0.232781	NA	-0.913862	NA	0.0593462	NA	-0.326299	NA	-0.854996	NA	-0.700472	NA	0.0935179	NA	-0.058866	NA	0.759819	NA	ENSG00000148156
ENSG00000117148	ACTL8	81569	-0.198751	0.52982	0.65239	0.0125915	0.433899	0.416547	0.40881	0.402961	0.337937	0.52573	0.0411413	0.999548	-0.607561	0.00662409	0.314453	0.208198	0.392757	0.2593	ENSG00000117148
ENSG00000181786	ACTL9	284382	2.9415	NA	2.37553	NA	-0.471529	NA	2.84788	NA	2.43429	NA	-0.510082	NA	0.0936226	NA	-0.0587606	NA	0.0385532	NA	ENSG00000181786
ENSG00000072110	ACTN1	87	0.272543	0.199705	0.105151	0.658283	-0.0574414	0.944631	-0.0360281	0.94587	-0.0561497	0.923951	0.0154731	0.999548	0.308571	0.0756509	0.161301	0.423236	-0.0729146	0.867392	ENSG00000072110
ENSG00000077522	ACTN2	88	1.33038	NA	-0.0970971	NA	0.0462849	NA	1.2368	NA	0.683055	NA	-1.19714	NA	0.0935757	NA	-0.780152	NA	1.24343	NA	ENSG00000077522
ENSG00000248746	ACTN3	89	2.91231	0.0961981	-0.986099	NA	-0.0736362	NA	3.2971	NA	0.813808	NA	0.351855	0.999548	-0.384787	0.869993	-1.79991	0.43787	-0.425491	NA	ENSG00000248746
ENSG00000130402	ACTN4	81	0.113918	0.72606	0.185689	0.546399	-0.172653	0.834632	0.113081	0.859859	0.202761	0.751598	0.0152502	0.999548	0.000836395	0.997886	-0.0170722	0.959743	-0.187903	0.6959	ENSG00000130402
ENSG00000131966	ACTR10	55860	-0.193813	0.0815512	-0.168659	0.129593	-0.267084	0.111983	0.145762	0.483106	0.128638	0.566297	-0.0676866	0.999548	-0.339575	0.000197576	-0.297297	0.00165772	-0.199397	0.148628	ENSG00000131966
ENSG00000138107	ACTR1A	10121	-0.221208	0.0200228	-0.161668	0.0963315	-0.140369	0.471974	0.138009	0.434483	-0.0260327	0.926349	0.0682431	0.999548	-0.359217	4.38639e-06	-0.135636	0.127408	-0.208612	0.0613262	ENSG00000138107
ENSG00000115073	ACTR1B	10120	-1.20428	3.98391e-10	-0.916531	2.2039e-06	-0.0193168	0.983186	-0.239799	0.561207	-0.329261	0.401044	0.125334	0.999548	-0.964483	3.71521e-09	-0.58727	0.000643563	-0.144651	0.691658	ENSG00000115073
ENSG00000138071	ACTR2	10097	-0.402271	0.000170081	-0.385532	0.000336939	-0.201728	0.346747	-0.384722	0.0180416	-0.419559	0.0138662	-0.159614	0.999548	-0.0175487	0.888839	0.0340272	0.791865	-0.0421141	0.864201	ENSG00000138071
ENSG00000115091	ACTR3	10096	-0.170093	0.249795	0.0427939	0.801462	-0.178232	0.556238	-0.300204	0.177019	-0.257702	0.301017	-0.174667	0.999548	0.130111	0.305681	0.300496	0.0121888	-0.00356503	0.992082	ENSG00000115091
ENSG00000133627	ACTR3B	57180	-0.548352	0.136601	-0.493277	0.155547	0.265834	0.757397	-0.459637	0.468712	-0.811948	0.132204	-0.0838698	0.999548	-0.0887149	0.790808	0.318671	0.292817	0.349704	0.452676	ENSG00000133627
ENSG00000106526	ACTR3C	653857	-0.331025	0.3219	-0.568017	0.0564258	-0.411077	0.494434	0.867735	0.0567105	0.606746	0.245662	0.224246	0.999548	-1.19876	8.6118e-07	-1.17476	1.64284e-06	-0.635323	0.0554728	ENSG00000106526
ENSG00000101442	ACTR5	79913	0.767233	1.62897e-06	0.805601	3.87717e-07	0.302063	0.361129	0.412467	0.129725	0.539675	0.044095	0.21679	0.999548	0.354766	0.0153379	0.265927	0.0921843	0.0852726	0.810768	ENSG00000101442
ENSG00000075089	ACTR6	64431	-0.192804	0.371106	-0.253285	0.217345	-0.295925	0.454428	-0.135745	0.750186	-0.0435224	0.942873	-0.149985	0.999548	-0.0570585	0.780874	-0.209763	0.266909	-0.14594	0.670972	ENSG00000075089
ENSG00000113812	ACTR8	93973	0.345517	0.00381244	0.368264	0.00180527	0.0434399	0.930335	0.00442467	0.989012	0.0922277	0.754491	0.0795784	0.999548	0.341093	0.000907306	0.276037	0.010848	-0.0361384	0.897451	ENSG00000113812
ENSG00000123165	ACTRT1	139741	1.98755	NA	-0.804529	NA	-1.01694	NA	1.89401	NA	-0.745671	NA	-1.77675	NA	0.0935444	NA	-0.0588583	NA	0.759815	NA	ENSG00000123165
ENSG00000169717	ACTRT2	140625	2.3339	NA	0.691066	NA	1.43993	NA	2.24028	NA	0.0285161	NA	1.40135	NA	0.093627	NA	0.66255	NA	0.0385764	NA	ENSG00000169717
ENSG00000184378	ACTRT3	84517	-0.28513	0.345013	-0.371647	0.181257	0.00604433	0.995659	-0.118924	0.853475	-0.27517	0.62408	-0.00606823	0.999548	-0.166206	0.52265	-0.0964768	0.74642	0.0121126	0.986824	ENSG00000184378
ENSG00000115170	ACVR1	90	1.70567	7.93947e-09	1.46651	9.11061e-07	0.465229	0.504281	0.756163	0.132085	0.662376	0.234839	0.0805539	0.999548	0.949505	0.000200531	0.804132	0.00264149	0.384675	0.397343	ENSG00000115170
ENSG00000135503	ACVR1B	91	0.720827	0.000914693	0.417393	0.0670045	0.121508	0.866554	0.598536	0.0788692	0.471558	0.223515	0.0645269	0.999548	0.122291	0.56813	-0.0541656	0.831087	0.0569808	0.907534	ENSG00000135503
ENSG00000123612	ACVR1C	130399	-0.400232	NA	-1.08131	NA	-1.28215	NA	-1.21498	NA	-1.74367	NA	-1.32053	NA	0.814746	NA	0.66236	NA	0.0383709	NA	ENSG00000123612
ENSG00000121989	ACVR2A	92	1.77917	5.77912e-15	1.32341	1.2408e-08	0.658139	0.0970565	0.800005	0.0342449	0.436876	0.361661	0.144345	0.999548	0.979161	4.14362e-06	0.886534	5.25173e-05	0.513794	0.11695	ENSG00000121989
ENSG00000114739	ACVR2B	93	-0.242933	0.591712	-0.260327	0.530155	0.176375	0.877159	0.425603	0.552193	0.365331	0.623482	0.527475	0.999548	-0.668536	0.0188139	-0.625658	0.0338257	-0.351101	0.48488	ENSG00000114739
ENSG00000139567	ACVRL1	94	1.3719	NA	0.690821	NA	0.489989	NA	3.7278	NA	3.19911	NA	2.90094	NA	-2.3559	NA	-2.50829	NA	-2.41095	NA	ENSG00000139567
ENSG00000243989	ACY1	95	1.3722	NA	0.691113	NA	0.490276	NA	4.32303	NA	2.4257	NA	2.19551	NA	-2.95084	NA	-1.73459	NA	-1.70523	NA	ENSG00000243989
ENSG00000132744	ACY3	91703	-0.874159	0.671129	1.32392	NA	-0.456087	NA	0.0648675	NA	0.0911945	NA	-1.46382	0.999548	-0.939026	0.594327	1.23272	0.393809	1.00773	NA	ENSG00000132744
ENSG00000119640	ACYP1	97	-1.1705	4.96443e-05	-0.511358	0.0864719	-0.0302605	0.980927	-0.109086	0.884695	0.102234	0.903869	0.164871	0.999548	-1.06141	2.3378e-05	-0.613592	0.0202829	-0.195132	0.723464	ENSG00000119640
ENSG00000170634	ACYP2	98	-0.767153	0.0959838	0.0588111	0.912358	0.101281	0.954568	-0.842447	0.258197	-0.354235	0.710652	-0.380783	0.999548	0.0752943	0.874374	0.413046	0.324459	0.482063	0.450126	ENSG00000170634
ENSG00000196839	ADA	100	-0.982462	2.15729e-06	-0.998319	5.96793e-07	-0.13679	0.826281	-0.577425	0.0838278	-0.728553	0.0256083	0.0866471	0.999548	-0.405037	0.0246006	-0.269765	0.171767	-0.223437	0.485559	ENSG00000196839
ENSG00000093072	ADA2	51816	0.410451	NA	2.12229	NA	0.511906	NA	-1.08327	NA	2.1811	NA	-0.247938	NA	1.49373	NA	-0.0588182	NA	0.759844	NA	ENSG00000093072
ENSG00000164113	ADAD1	132612	0.410417	NA	1.58089	NA	-0.471491	NA	0.316858	NA	1.63969	NA	-0.509999	NA	0.0935585	NA	-0.0587993	NA	0.0385081	NA	ENSG00000164113
ENSG00000140955	ADAD2	161931	1.37214	NA	0.691031	NA	0.490199	NA	0.574187	NA	1.47109	NA	1.17292	NA	0.797949	NA	-0.780061	NA	-0.682725	NA	ENSG00000140955
ENSG00000168803	ADAL	161823	-1.51409	1.27199e-09	-1.13609	8.03058e-07	-0.231996	0.694192	-1.30089	0.000146352	-0.916169	0.0114941	-0.397076	0.999548	-0.213205	0.327223	-0.219922	0.33892	0.16508	0.691006	ENSG00000168803
ENSG00000137845	ADAM10	102	0.992774	9.96392e-06	0.35877	0.155973	0.0454802	0.965659	0.654951	0.0709235	0.379203	0.40966	-0.0307788	0.999548	0.337823	0.104513	-0.0204333	0.944796	0.076259	0.884522	ENSG00000137845
ENSG00000073670	ADAM11	4185	-1.02641	0.588264	-1.62447	0.360509	0.443655	NA	0.29436	NA	-0.45436	NA	1.23002	0.999548	-1.32077	0.214744	-1.17011	0.294674	-0.786367	NA	ENSG00000073670
ENSG00000148848	ADAM12	8038	0.21078	0.329706	0.372235	0.0569285	0.0438725	0.958057	0.384687	0.225442	0.181419	0.663068	0.0758773	0.999548	-0.173907	0.310233	0.190815	0.289023	-0.0320048	0.942529	ENSG00000148848
ENSG00000143537	ADAM15	8751	0.600372	0.00184944	0.182232	0.412556	0.340768	0.38824	0.837985	0.00210676	0.583373	0.0672483	0.281985	0.999548	-0.237612	0.179361	-0.401142	0.0209119	0.0587835	0.89401	ENSG00000143537
ENSG00000151694	ADAM17	6868	1.39416	7.9996e-11	0.935449	2.83608e-05	0.187416	0.779745	0.981511	0.00218464	0.707252	0.0558314	0.040962	0.999548	0.412653	0.0365707	0.228196	0.311038	0.146454	0.734148	ENSG00000151694
ENSG00000168619	ADAM18	8749	1.37216	NA	-0.270722	NA	1.59843	NA	1.32392	NA	1.28922	NA	2.33969	NA	0.0482397	NA	-1.55994	NA	-0.741251	NA	ENSG00000168619
ENSG00000135074	ADAM19	8728	1.45657	NA	0.690564	NA	-0.846705	NA	3.52486	NA	3.65699	NA	2.02238	NA	-2.06829	NA	-2.96642	NA	-2.86908	NA	ENSG00000135074
ENSG00000104755	ADAM2	2515	1.37218	NA	0.691139	NA	0.490276	NA	1.27863	NA	-0.750297	NA	0.451768	NA	0.0935578	NA	1.44144	NA	0.0385075	NA	ENSG00000104755
ENSG00000134007	ADAM20	8748	1.37226	NA	0.691181	NA	1.44098	NA	-0.993981	NA	-1.26405	NA	-0.146665	NA	2.36625	NA	1.95524	NA	1.58765	NA	ENSG00000134007
ENSG00000139985	ADAM21	8747	-0.481788	NA	-1.16288	NA	0.921226	NA	-0.284015	NA	2.15264	NA	1.07337	NA	-0.197774	NA	-3.31552	NA	-0.152142	NA	ENSG00000139985
ENSG00000008277	ADAM22	53616	0.276734	0.515598	0.445255	0.228036	0.0241645	0.987079	0.427116	0.524698	0.557772	0.36936	-0.0574121	0.999548	-0.150382	0.630874	-0.112518	0.748558	0.0815766	0.907534	ENSG00000008277
ENSG00000114948	ADAM23	8745	-0.825662	0.147598	-0.861316	0.108092	-0.392023	0.781625	0.655686	0.537721	0.0295344	0.984851	0.237769	0.999548	-1.48135	0.00103548	-0.89085	0.0563082	-0.629792	0.394636	ENSG00000114948
ENSG00000042980	ADAM28	10863	1.37208	NA	0.691021	NA	1.47366	NA	3.29628	NA	1.30384	NA	2.73156	NA	-1.9242	NA	-0.612818	NA	-1.2579	NA	ENSG00000042980
ENSG00000134249	ADAM30	11085	1.37225	NA	0.691175	NA	0.490382	NA	0.557447	NA	0.0287581	NA	-2.14041	NA	0.814804	NA	0.662417	NA	2.63079	NA	ENSG00000134249
ENSG00000197140	ADAM32	203102	0.979773	0.585558	1.26044	0.409144	-1.40602	0.783926	0.421708	NA	0.889275	NA	-1.47648	0.999548	0.558065	0.555801	0.371165	0.7322	0.0704518	0.979504	ENSG00000197140
ENSG00000149451	ADAM33	80332	0.41038	NA	-0.270696	NA	-0.471527	NA	1.03809	NA	0.509396	NA	0.211228	NA	-0.627705	NA	-0.780092	NA	-0.682756	NA	ENSG00000149451
ENSG00000151651	ADAM8	101	0.783831	0.701831	0.642782	0.739957	-1.02708	0.863798	1.45995	NA	1.07001	NA	-0.955576	0.999548	-0.676123	0.42975	-0.427226	0.652969	-0.0715057	0.977256	ENSG00000151651
ENSG00000168615	ADAM9	8754	0.799774	0.00150252	0.503035	0.0594371	0.0241536	0.983632	0.467008	0.296135	0.133775	0.838008	-0.178771	0.999548	0.332766	0.15031	0.369261	0.125309	0.202925	0.651189	ENSG00000168615
ENSG00000154734	ADAMTS1	9510	1.75573	6.33317e-25	1.15991	4.40554e-11	0.275707	0.509261	1.02353	3.46612e-05	0.747655	0.00766805	0.0888221	0.999548	0.732199	6.47431e-07	0.41225	0.00973669	0.186885	0.513581	ENSG00000154734
ENSG00000142303	ADAMTS10	81794	4.13724	NA	1.6529	NA	2.56159	NA	2.71745	NA	1.71167	NA	3.24436	NA	1.41979	NA	-0.05877	NA	-0.682767	NA	ENSG00000142303
ENSG00000151388	ADAMTS12	81792	1.3722	NA	2.26594	NA	1.47466	NA	0.557321	NA	1.60343	NA	-0.597295	NA	0.81488	NA	0.662513	NA	2.07196	NA	ENSG00000151388
ENSG00000160323	ADAMTS13	11093	1.37221	0.687041	3.09499	NA	3.12996	NA	0.306281	NA	2.71521	NA	3.70878	NA	1.06593	NA	0.379774	NA	-0.578818	NA	ENSG00000160323
ENSG00000138316	ADAMTS14	140766	1.37215	NA	2.54235	NA	1.47514	NA	0.557221	NA	1.87979	NA	1.43657	NA	0.814929	NA	0.662568	NA	0.0385657	NA	ENSG00000138316
ENSG00000166106	ADAMTS15	170689	1.37212	NA	0.691048	NA	1.99029	NA	1.96974	NA	0.658661	NA	1.84622	NA	-0.59762	NA	0.0323874	NA	0.144071	NA	ENSG00000166106
ENSG00000145536	ADAMTS16	170690	-0.509344	0.0634452	-0.335479	0.209838	-0.692032	0.0698371	0.412845	0.38545	-0.00443548	0.994983	-0.0385363	0.999548	-0.922188	1.51965e-05	-0.331043	0.158589	-0.653496	0.0203235	ENSG00000145536
ENSG00000140470	ADAMTS17	170691	-0.358023	NA	-1.03911	NA	1.37822	NA	-1.45849	NA	-2.33283	NA	2.06443	NA	1.10046	NA	1.29373	NA	-0.686213	NA	ENSG00000140470
ENSG00000140873	ADAMTS18	170692	1.3721	NA	2.72216	NA	1.47546	NA	1.27847	NA	2.78088	NA	0.715537	NA	0.0936292	NA	-0.0587257	NA	0.759919	NA	ENSG00000140873
ENSG00000145808	ADAMTS19	171019	1.37194	NA	3.52989	NA	0.490036	NA	2.71635	NA	5.02663	NA	1.88949	NA	-1.3444	NA	-1.49675	NA	-1.39945	NA	ENSG00000145808
ENSG00000087116	ADAMTS2	9509	2.33388	NA	0.69101	NA	1.47511	NA	2.2402	NA	1.47106	NA	1.43648	NA	0.0936816	NA	-0.780045	NA	0.0386329	NA	ENSG00000087116
ENSG00000173157	ADAMTS20	80070	-1.50741	0.331647	-0.312357	0.796392	0.0985201	0.98012	-1.27409	0.579683	0.425772	NA	0.29838	0.999548	-0.233317	0.73346	-0.738129	0.260581	-0.19986	0.892923	ENSG00000173157
ENSG00000156140	ADAMTS3	9508	-1.98676	0.395942	-2.66784	NA	1.35626	NA	-0.505374	NA	-2.82109	NA	-0.107396	0.999548	-1.48139	0.460193	0.153247	0.944454	1.46366	NA	ENSG00000156140
ENSG00000158859	ADAMTS4	9507	0.404149	0.771455	-0.336384	0.809784	0.209643	0.963375	1.48221	NA	1.54453	NA	1.27186	0.999548	-1.07806	0.30162	-1.88091	0.0879859	-1.06221	0.550371	ENSG00000158859
ENSG00000154736	ADAMTS5	11096	1.2767	0.0008643	1.74008	1.91418e-07	0.319452	0.77944	1.21643	0.0143154	1.49741	0.00105346	0.291412	0.999548	0.0602691	0.830309	0.242668	0.338951	0.0280407	0.968176	ENSG00000154736
ENSG00000049192	ADAMTS6	11174	0.807199	0.30256	0.714393	0.328482	0.957722	0.470614	0.886656	0.446166	0.367423	NA	0.706708	0.999548	-0.0794573	0.882355	0.346971	0.47237	0.251014	0.791807	ENSG00000049192
ENSG00000136378	ADAMTS7	11173	4.05671	0.0145303	1.99222	NA	0.551548	NA	4.98318	NA	2.03434	NA	2.06977	0.999548	-0.92647	0.596331	-0.0421224	0.983875	-1.51823	NA	ENSG00000136378
ENSG00000134917	ADAMTS8	11095	1.372	NA	0.690926	NA	0.490095	NA	2.71645	NA	2.18776	NA	1.88959	NA	-1.34445	NA	-1.49683	NA	-1.3995	NA	ENSG00000134917
ENSG00000163638	ADAMTS9	56999	5.49343	0.00586401	6.09929	NA	4.02966	NA	6.12117	NA	6.15806	NA	2.22499	0.999548	-0.627736	0.805799	-0.0587705	0.984425	1.80467	NA	ENSG00000163638
ENSG00000178031	ADAMTSL1	92949	0.240497	0.924179	-1.52687	NA	0.456046	NA	1.57572	NA	-0.0698988	NA	1.01846	NA	-1.33522	NA	-1.45697	NA	-0.562418	NA	ENSG00000178031
ENSG00000197859	ADAMTSL2	9719	0.410424	0.91414	-0.270659	NA	0.501372	NA	0.742006	NA	-0.479603	NA	2.04638	NA	-0.331582	NA	0.208944	NA	-1.545	NA	ENSG00000197859
ENSG00000156218	ADAMTSL3	57188	1.37216	NA	0.691101	NA	1.43998	NA	1.27859	NA	0.0285886	NA	0.680111	NA	0.0935745	NA	0.662513	NA	0.759864	NA	ENSG00000156218
ENSG00000143382	ADAMTSL4	54507	2.00128	0.00332341	2.49381	0.000204466	2.35928	0.0102165	2.76555	0.00446937	3.33651	0.000880641	2.67505	0.172659	-0.76427	0.226324	-0.842693	0.20366	-0.315773	0.830171	ENSG00000143382
ENSG00000185761	ADAMTSL5	339366	0.409192	0.231035	0.709759	0.0195191	-0.0511804	0.971524	0.597487	0.249177	0.820276	0.0946196	0.359235	0.999548	-0.188294	0.513489	-0.110517	0.73901	-0.410415	0.314092	ENSG00000185761
ENSG00000105963	ADAP1	11033	0.66788	0.175625	0.463743	0.354249	-0.0373526	0.984718	-0.217654	0.837145	-0.516398	0.569797	-0.623982	0.999548	0.885534	0.0118502	0.980141	0.00644945	0.58663	0.304221	ENSG00000105963
ENSG00000184060	ADAP2	55803	1.37215	NA	1.65285	NA	0.490254	NA	1.27855	NA	1.71162	NA	-0.269617	NA	0.0935972	NA	-0.0587745	NA	0.759872	NA	ENSG00000184060
ENSG00000160710	ADAR	103	0.637755	0.00157532	0.691901	0.000609107	0.056182	0.950388	-0.350539	0.335965	-0.230863	0.599802	-0.0386352	0.999548	0.988294	3.13609e-09	0.922763	6.18049e-08	0.0948172	0.830328	ENSG00000160710
ENSG00000197381	ADARB1	104	0.340402	0.0227047	-0.238345	0.126026	-0.131456	0.744571	-0.593851	0.00325172	-0.497404	0.0271731	-0.248958	0.999548	0.934253	1.92111e-17	0.259059	0.0397974	0.117503	0.623035	ENSG00000197381
ENSG00000065457	ADAT1	23536	-0.511667	0.00210007	-0.406773	0.0123887	-0.185032	0.63165	-0.0974806	0.798552	-0.104827	0.790435	-0.140924	0.999548	-0.414187	0.00203108	-0.301946	0.0341111	-0.0441077	0.902795	ENSG00000065457
ENSG00000189007	ADAT2	134637	0.542181	0.029878	0.622485	0.00972939	0.377914	0.450349	0.075974	0.905644	0.274662	0.598795	0.114281	0.999548	0.466207	0.0330264	0.347824	0.144536	0.263633	0.505317	ENSG00000189007
ENSG00000213638	ADAT3	113179	0.358968	0.365996	0.324222	0.395196	0.371805	0.655145	0.723272	0.200906	0.479683	0.46999	0.635028	0.999548	-0.364304	0.222251	-0.155462	0.659074	-0.263222	0.637674	ENSG00000213638
ENSG00000063761	ADCK1	57143	-0.353119	0.0783604	0.306105	0.0873473	0.114964	0.827826	0.0767128	0.868343	0.0805511	0.859264	-0.00794499	0.999548	-0.429832	0.00592035	0.225554	0.176236	0.122909	0.70458	ENSG00000063761
ENSG00000133597	ADCK2	90956	-0.776678	0.0137582	-0.997648	0.000929246	0.0715038	0.955998	-0.266565	0.678492	-0.451105	0.446243	0.108284	0.999548	-0.510113	0.0412293	-0.546543	0.0341688	-0.0367801	0.960926	ENSG00000133597
ENSG00000173137	ADCK5	203054	-0.136418	0.750839	0.0256383	0.95505	-0.240335	0.806087	0.574141	0.322039	0.633218	0.278315	0.0748038	0.999548	-0.71056	0.00754148	-0.60758	0.0295799	-0.315139	0.515669	ENSG00000173137
ENSG00000164742	ADCY1	107	2.0822	NA	1.62917	NA	-0.471472	NA	-0.0503282	NA	-0.355045	NA	-1.83867	NA	2.13253	NA	1.98421	NA	1.3672	NA	ENSG00000164742
ENSG00000143199	ADCY10	55811	-0.435732	NA	-0.15502	NA	-1.31765	NA	0.27962	NA	-0.592151	NA	-1.0683	NA	-0.715352	NA	0.437131	NA	-0.249358	NA	ENSG00000143199
ENSG00000078295	ADCY2	108	1.37213	NA	0.69104	NA	0.490205	NA	1.3871	NA	2.09328	NA	1.79511	NA	-0.0149681	NA	-1.40224	NA	-1.30491	NA	ENSG00000078295
ENSG00000138031	ADCY3	109	0.441355	0.00599871	0.234539	0.170098	0.414268	0.0946688	0.322572	0.221134	0.247011	0.419549	0.0818521	0.999548	0.118783	0.413253	-0.0124719	0.947724	0.332416	0.0606636	ENSG00000138031
ENSG00000129467	ADCY4	196883	0.4105	NA	-0.27059	NA	-0.471407	NA	-0.404309	NA	-0.211688	NA	-1.23117	NA	0.81481	NA	-0.0589021	NA	0.759759	NA	ENSG00000129467
ENSG00000173175	ADCY5	111	3.07502	NA	1.65288	NA	0.49026	NA	0.623714	NA	1.71168	NA	0.451732	NA	2.4513	NA	-0.0587992	NA	0.0385283	NA	ENSG00000173175
ENSG00000174233	ADCY6	112	0.376065	0.273972	-0.448579	0.182973	-0.113936	0.929009	0.449994	0.426734	0.338993	0.606586	0.218463	0.999548	-0.0739296	0.817239	-0.787572	0.00231334	-0.332399	0.463327	ENSG00000174233
ENSG00000121281	ADCY7	113	0.159056	0.601231	-0.00219047	0.994401	-0.0995267	0.919489	0.30875	0.52499	-0.0565444	0.942291	-0.159479	0.999548	-0.149694	0.522979	0.054354	0.84617	0.0599524	0.912504	ENSG00000121281
ENSG00000155897	ADCY8	114	-0.500265	NA	-1.18134	NA	-1.38219	NA	-1.315	NA	-1.84369	NA	-1.42055	NA	0.814739	NA	0.662352	NA	0.0383631	NA	ENSG00000155897
ENSG00000162104	ADCY9	115	0.19496	0.392787	-0.0141823	0.958339	-0.205609	0.679469	0.354689	0.279612	0.123782	0.787227	-0.08472	0.999548	-0.159729	0.326329	-0.137965	0.437877	-0.120889	0.704161	ENSG00000162104
ENSG00000141433	ADCYAP1	116	1.37213	NA	1.65283	NA	0.490224	NA	1.27851	NA	1.71158	NA	0.451655	NA	0.0936197	NA	-0.058752	NA	0.0385693	NA	ENSG00000141433
ENSG00000087274	ADD1	118	-0.33436	0.00224448	-0.378323	0.000435382	-0.0660565	0.849525	-0.266695	0.133089	-0.0996319	0.691828	0.104183	0.999548	-0.0676645	0.53503	-0.278691	0.00370041	-0.170239	0.247266	ENSG00000087274
ENSG00000075340	ADD2	119	1.37216	NA	0.691114	NA	1.43996	NA	1.27859	NA	-0.646038	NA	1.40142	NA	0.0935759	NA	1.33715	NA	0.0385404	NA	ENSG00000075340
ENSG00000148700	ADD3	120	-1.11341	0.000119186	-0.689751	0.0236266	-0.348654	0.633267	-0.0752893	0.924719	-0.00863195	0.992436	0.0262785	0.999548	-1.03812	2.93799e-05	-0.681119	0.0102248	-0.374932	0.389683	ENSG00000148700
ENSG00000118492	ADGB	79747	1.37219	NA	-0.270661	NA	0.513755	NA	1.27862	NA	-0.211834	NA	0.47523	NA	0.093575	NA	-0.0588267	NA	0.038525	NA	ENSG00000118492
ENSG00000197177	ADGRA1	84435	1.37217	NA	0.691106	NA	0.490259	NA	1.27858	NA	0.0285857	NA	0.451728	NA	0.0935822	NA	0.66252	NA	0.0385318	NA	ENSG00000197177
ENSG00000020181	ADGRA2	25960	-0.114597	0.879959	0.120111	0.859764	-0.243761	0.896069	0.983649	0.283174	0.839511	0.386423	0.363644	0.999548	-1.09825	0.00592035	-0.719401	0.0950628	-0.607406	0.357759	ENSG00000020181
ENSG00000152990	ADGRA3	166647	0.897707	1.54728e-06	0.659245	0.000492908	0.12102	0.845944	0.459906	0.123612	0.536179	0.0757767	-0.0344051	0.999548	0.437801	0.00236491	0.123066	0.49169	0.155425	0.583291	ENSG00000152990
ENSG00000181790	ADGRB1	575	2.66846	0.151246	2.00896	NA	1.10264	NA	1.78951	NA	4.12299	NA	2.40298	0.999548	0.878944	0.607819	-2.11403	0.307121	-1.30034	NA	ENSG00000181790
ENSG00000121753	ADGRB2	576	-0.527802	0.348289	-1.23643	0.0148032	-0.483001	0.691578	0.0568841	0.965025	-0.166552	0.903869	-0.0585039	0.999548	-0.584686	0.12527	-1.06988	0.00412734	-0.424497	0.526309	ENSG00000121753
ENSG00000135298	ADGRB3	577	0.73045	0.840244	-0.793664	NA	-0.38576	NA	1.0247	NA	-1.00997	NA	-0.0338884	NA	-0.29425	NA	0.216309	NA	-0.351872	NA	ENSG00000135298
ENSG00000111452	ADGRD1	283383	1.37223	NA	3.23586	NA	-0.471487	NA	-0.0209837	NA	3.32557	NA	-1.02573	NA	1.39322	NA	-0.0897108	NA	0.554241	NA	ENSG00000111452
ENSG00000180264	ADGRD2	347088	3.16017	NA	-0.27082	NA	1.02677	NA	4.57077	NA	1.29219	NA	2.49243	NA	-1.4106	NA	-1.56302	NA	-1.46566	NA	ENSG00000180264
ENSG00000174837	ADGRE1	2015	2.45413	NA	1.73247	NA	-1.27775	NA	0.727569	NA	0.0327112	NA	-0.578404	NA	1.72656	NA	1.69976	NA	-0.699342	NA	ENSG00000174837
ENSG00000127507	ADGRE2	30817	1.04175	1.97143e-05	1.247	1.30809e-07	0.329909	0.568186	1.00006	0.00466118	0.992698	0.00779966	0.254295	0.999548	0.0416984	0.877128	0.254301	0.285085	0.075614	0.890561	ENSG00000127507
ENSG00000131355	ADGRE3	84658	0.41047	NA	-0.27059	NA	-0.471437	NA	0.316963	NA	-0.933036	NA	-0.509894	NA	0.0935071	NA	0.662445	NA	0.0384567	NA	ENSG00000131355
ENSG00000123146	ADGRE5	976	1.35227	1.12129e-14	1.288	3.49131e-13	0.40772	0.229261	1.41973	5.36698e-09	1.07427	4.87745e-05	0.419049	0.999548	-0.0674656	0.729502	0.213724	0.239146	-0.0113288	0.983838	ENSG00000123146
ENSG00000153292	ADGRF1	266977	1.37225	NA	0.691135	NA	0.490318	NA	-1.34702	NA	1.4713	NA	-0.828205	NA	2.71927	NA	-0.780163	NA	1.31852	NA	ENSG00000153292
ENSG00000173567	ADGRF3	165082	-1.5217	0.55694	-2.20279	NA	-2.40362	NA	-1.07482	NA	-2.2733	NA	-2.97175	NA	-0.446883	NA	0.070514	NA	0.56813	NA	ENSG00000173567
ENSG00000153294	ADGRF4	221393	-2.3011	0.193303	0.241401	0.856084	-0.519237	0.891344	-0.624425	NA	-0.0566022	NA	1.04885	0.999548	-1.67667	0.0603539	0.298003	0.764923	-1.56809	0.236307	ENSG00000153294
ENSG00000069122	ADGRF5	221395	1.37208	NA	0.691001	NA	0.490169	NA	1.99971	NA	1.47102	NA	1.17285	NA	-0.62763	NA	-0.780017	NA	-0.682681	NA	ENSG00000069122
ENSG00000205336	ADGRG1	9289	-0.520053	0.195649	0.314814	0.452588	-0.436724	0.622404	0.643467	0.320017	0.562063	0.435174	0.339572	0.999548	-1.16352	0.000112928	-0.247249	0.51667	-0.776296	0.0721129	ENSG00000205336
ENSG00000173698	ADGRG2	10149	1.37206	NA	2.72215	NA	0.490157	NA	1.99971	NA	2.05116	NA	1.17285	NA	-0.627644	NA	0.670985	NA	-0.682694	NA	ENSG00000173698
ENSG00000182885	ADGRG3	222487	-0.953788	0.650191	-4.02234	NA	-1.64338	NA	-1.02034	NA	-3.81244	NA	-1.40704	0.999548	0.0665555	0.972398	-0.209904	0.9151	-0.236348	NA	ENSG00000182885
ENSG00000156920	ADGRG4	139378	2.33391	NA	2.44501	NA	1.44134	NA	3.90073	NA	4.1642	NA	3.78454	NA	-1.56681	NA	-1.71919	NA	-2.3432	NA	ENSG00000156920
ENSG00000159618	ADGRG5	221188	-0.48577	NA	-1.16685	NA	-0.390408	NA	1.86002	NA	-0.127735	NA	-0.673468	NA	-2.34579	NA	-1.03911	NA	0.28306	NA	ENSG00000159618
ENSG00000112414	ADGRG6	57211	0.550691	0.119713	0.845926	0.0117975	0.0973352	0.944826	1.45947	0.00160976	0.993411	0.066441	0.158201	0.999548	-0.908781	0.00108495	-0.147484	0.689322	-0.0608659	0.939883	ENSG00000112414
ENSG00000144820	ADGRG7	84873	1.37219	NA	0.691112	NA	0.490317	NA	1.27864	NA	0.749949	NA	-1.29356	NA	0.0935502	NA	-0.0588365	NA	1.78387	NA	ENSG00000144820
ENSG00000072071	ADGRL1	22859	0.482986	0.527067	-1.5701	0.0745265	-0.68702	0.700362	-0.355081	0.783541	-1.42544	0.26558	-1.0874	0.999548	0.838068	0.0284186	-0.144665	0.783809	0.400384	0.591595	ENSG00000072071
ENSG00000117114	ADGRL2	23266	0.327047	0.363137	0.155882	0.669172	0.469918	0.425212	0.275792	0.644911	0.203419	0.760091	0.13343	0.999548	0.0512553	0.840956	-0.0475369	0.8651	0.336488	0.286858	ENSG00000117114
ENSG00000150471	ADGRL3	23284	0.923547	0.470739	2.11565	0.0276833	-0.0169415	0.996663	-0.987752	0.628029	-0.248217	NA	-1.03233	0.999548	1.9113	0.00333169	2.36387	0.000280338	1.01539	0.372515	ENSG00000150471
ENSG00000162618	ADGRL4	64123	-2.3721	0.207282	-0.572612	NA	-0.00221618	NA	-0.125	NA	-0.627682	NA	-0.790025	0.999548	-2.2471	0.160157	0.0550707	0.973947	0.787809	NA	ENSG00000162618
ENSG00000164199	ADGRV1	84059	0.65924	0.674163	-0.26845	0.875491	1.88824	NA	1.79282	NA	2.1721	NA	3.28712	0.999548	-1.13358	0.370458	-2.44056	0.0940937	-1.39888	NA	ENSG00000164199
ENSG00000248144	ADH1C	126	1.37211	NA	0.691033	NA	2.56919	NA	1.27847	NA	0.749782	NA	2.53058	NA	0.0936371	NA	-0.0587496	NA	0.0386192	NA	ENSG00000248144
ENSG00000197894	ADH5	128	-0.101082	0.484047	-0.305158	0.0143522	-0.134495	0.661898	0.22084	0.313376	0.199394	0.413692	0.0233041	0.999548	-0.321922	0.00236344	-0.504551	1.59945e-06	-0.157799	0.382832	ENSG00000197894
ENSG00000196344	ADH7	131	0.410415	NA	0.691116	NA	0.513755	NA	0.316855	NA	0.749927	NA	0.47523	NA	0.09356	NA	-0.0588116	NA	0.038525	NA	ENSG00000196344
ENSG00000147576	ADHFE1	137872	-1.94081	NA	-2.6219	NA	-1.86992	NA	-3.03695	NA	-1.85406	NA	-2.54191	NA	1.09614	NA	-0.767836	NA	0.671993	NA	ENSG00000147576
ENSG00000182551	ADI1	55256	-0.028296	0.929034	0.0656656	0.826561	0.012737	0.990289	-0.19874	0.693168	0.0272949	0.970775	0.0380057	0.999548	0.170444	0.456913	0.0383707	0.893606	-0.0252687	0.969041	ENSG00000182551
ENSG00000159346	ADIPOR1	51094	-0.270358	0.234108	-0.413494	0.0529009	-0.0771729	0.927562	-0.317751	0.399033	-0.253728	0.553317	-0.144985	0.999548	0.0473927	0.830244	-0.159766	0.445496	0.0678118	0.881517	ENSG00000159346
ENSG00000006831	ADIPOR2	79602	-0.09747	0.546005	-0.0414032	0.806273	-0.129331	0.715985	-0.458154	0.0211517	-0.290193	0.22255	-0.27931	0.999548	0.360684	0.00129725	0.24879	0.0393477	0.14998	0.465021	ENSG00000006831
ENSG00000148671	ADIRF	10974	-2.47516	NA	-2.19446	NA	-2.40376	NA	-2.49695	NA	-0.373027	NA	-0.719305	NA	0.0217941	NA	-1.82143	NA	-1.68445	NA	ENSG00000148671
ENSG00000156110	ADK	132	-0.0352748	0.816073	0.0519558	0.71573	-0.0170001	0.97496	-0.226276	0.258563	-0.265619	0.194446	-0.0703387	0.999548	0.191001	0.0667207	0.317575	0.00185524	0.0533386	0.834221	ENSG00000156110
ENSG00000148926	ADM	133	0.960475	9.48235e-05	1.09179	7.30976e-06	0.111091	0.905742	1.37645	5.74242e-05	1.12151	0.0027876	0.682069	0.998436	-0.415974	0.0620741	-0.029723	0.9223	-0.570978	0.0549775	ENSG00000148926
ENSG00000128165	ADM2	79924	-0.593766	0.74583	-1.74586	NA	0.0124812	NA	1.37425	NA	-1.35706	NA	0.758876	0.999548	-1.96802	0.304341	-0.388799	0.856936	-0.746395	NA	ENSG00000128165
ENSG00000224420	ADM5	199800	1.37222	0.565689	2.52429	0.217865	1.45093	0.808727	0.959554	0.787021	2.4247	NA	1.44565	0.999548	0.412667	0.438394	0.0995861	0.881278	0.00527562	0.997435	ENSG00000224420
ENSG00000101126	ADNP	23394	-0.105583	0.388733	0.118853	0.314513	-0.0711501	0.829924	-0.900551	3.81774e-11	-0.422453	0.00911972	-0.399868	0.232912	0.794967	2.93712e-21	0.541307	4.97739e-10	0.328718	0.00319084	ENSG00000101126
ENSG00000101544	ADNP2	22850	-0.0332015	0.841594	0.227322	0.0724012	-0.091118	0.801384	-1.07978	3.5332e-12	-0.327291	0.105277	-0.404142	0.425113	1.04658	4.17745e-29	0.554614	2.22375e-08	0.313024	0.0199879	ENSG00000101544
ENSG00000181915	ADO	84890	0.269181	0.190642	0.290738	0.143933	0.355883	0.309123	0.0205602	0.969703	0.115344	0.806167	0.109552	0.999548	0.248621	0.1593	0.175394	0.371922	0.246331	0.381453	ENSG00000181915
ENSG00000163485	ADORA1	134	-1.34656	0.0839939	-0.368486	0.575844	0.468759	0.728817	-0.674021	0.613365	-0.124196	0.938696	-0.00291228	0.999548	-0.67254	0.113491	-0.24429	0.622165	0.471671	0.488967	ENSG00000163485
ENSG00000128271	ADORA2A	135	1.90364	0.310859	-0.186163	0.944335	-1.3488	0.821758	0.727464	NA	-1.11498	NA	-1.98324	0.999548	1.17617	0.133626	0.92882	0.282477	0.634441	0.699283	ENSG00000128271
ENSG00000170425	ADORA2B	136	1.12542	9.66322e-07	1.31186	6.2989e-09	0.591976	0.136587	0.305718	0.520881	0.423147	0.350825	-0.215977	0.999548	0.819704	3.65264e-05	0.888714	1.03141e-05	0.807952	0.00102159	ENSG00000170425
ENSG00000159322	ADPGK	83440	0.944795	1.74405e-07	0.732548	7.33111e-05	0.312097	0.427878	0.843158	0.0013424	0.590355	0.051004	0.120834	0.999548	0.101636	0.588997	0.142193	0.460359	0.191263	0.512997	ENSG00000159322
ENSG00000144843	ADPRH	141	1.37218	NA	0.691134	NA	1.43999	NA	1.27863	NA	-0.759304	NA	0.680152	NA	0.0935499	NA	1.45044	NA	0.759839	NA	ENSG00000144843
ENSG00000153531	ADPRHL1	113622	0.198737	0.650388	0.533771	0.127958	-0.758238	0.248541	0.83815	0.118993	0.869653	0.0972535	0.292114	0.999548	-0.639413	0.0128761	-0.335882	0.240325	-1.05035	0.000745516	ENSG00000153531
ENSG00000170222	ADPRM	56985	-0.249552	0.384553	-0.370482	0.146533	-0.3232	0.529483	0.2203	0.681174	0.0159758	0.982785	-0.280308	0.999548	-0.469852	0.0301631	-0.386458	0.0882639	-0.0428922	0.941419	ENSG00000170222
ENSG00000116863	ADPRS	54936	0.851164	2.22978e-14	0.536957	3.11141e-06	0.196733	0.429082	0.632944	0.000115046	0.416037	0.0283377	0.191472	0.999548	0.21822	0.0400607	0.12092	0.317982	0.0052609	0.988271	ENSG00000116863
ENSG00000120907	ADRA1A	148	2.33394	NA	0.691116	NA	1.47523	NA	2.24036	NA	-0.714807	NA	0.715374	NA	0.0935818	NA	1.40592	NA	0.75986	NA	ENSG00000120907
ENSG00000170214	ADRA1B	147	-1.83514	0.373934	-1.17455	NA	-0.885373	NA	-2.22357	NA	-0.400149	NA	0.810962	0.999548	0.38843	0.769426	-0.774399	0.587191	-1.69633	NA	ENSG00000170214
ENSG00000171873	ADRA1D	146	0.410445	NA	0.691176	NA	0.513787	NA	0.31693	NA	-0.700967	NA	0.475307	NA	0.0935147	NA	1.39214	NA	0.0384797	NA	ENSG00000171873
ENSG00000150594	ADRA2A	150	1.37215	NA	0.691071	NA	1.4755	NA	1.27855	NA	0.74986	NA	0.715613	NA	0.0935975	NA	-0.0587891	NA	0.759888	NA	ENSG00000150594
ENSG00000184160	ADRA2C	152	1.37207	NA	1.65277	NA	0.490161	NA	2.06676	NA	2.49984	NA	1.2399	NA	-0.694689	NA	-0.847062	NA	-0.749737	NA	ENSG00000184160
ENSG00000043591	ADRB1	153	0.386063	NA	1.27592	NA	-1.45763	NA	0.292539	NA	-0.156211	NA	-2.97087	NA	0.0935242	NA	1.43213	NA	1.51324	NA	ENSG00000043591
ENSG00000169252	ADRB2	154	1.17577	0.0249673	0.644956	0.249517	0.0644898	0.978289	0.422529	0.688768	0.623872	0.544718	0.252282	0.999548	0.753236	0.0652251	0.0210847	0.972685	-0.187793	0.857961	ENSG00000169252
ENSG00000188778	ADRB3	155	1.37213	NA	1.65283	NA	0.490224	NA	1.27851	NA	1.71158	NA	0.451655	NA	0.0936197	NA	-0.058752	NA	0.0385693	NA	ENSG00000188778
ENSG00000130706	ADRM1	11047	0.183244	0.352038	0.17529	0.372941	0.0162812	0.983632	0.366148	0.210044	0.375514	0.231152	0.175297	0.999548	-0.182904	0.258783	-0.200224	0.240088	-0.159016	0.581638	ENSG00000130706
ENSG00000239900	ADSL	158	0.573007	4.86662e-05	0.52905	0.000225917	0.104153	0.81419	0.361949	0.124737	0.196743	0.514391	-0.0591392	0.999548	0.211057	0.10875	0.332308	0.0106505	0.163292	0.469256	ENSG00000239900
ENSG00000185100	ADSS1	122622	-1.88333	0.000166394	-1.92972	9.82142e-05	-0.634713	0.578123	-0.249319	0.840169	-0.307855	0.806381	0.0136396	0.999548	-1.63401	9.25863e-05	-1.62187	0.00015672	-0.648353	0.363147	ENSG00000185100
ENSG00000035687	ADSS2	159	0.382599	0.00804022	0.143329	0.378424	-0.0544407	0.927562	0.024927	0.949519	-0.077417	0.832995	-0.138857	0.999548	0.357672	0.00373462	0.220746	0.104938	0.0844164	0.769369	ENSG00000035687
ENSG00000111863	ADTRP	84830	-2.11571	0.338337	-1.83791	NA	-1.77435	NA	-3.07533	NA	-1.80945	NA	-1.18311	0.999548	0.959618	0.527016	-0.0284619	0.987973	-0.59124	NA	ENSG00000111863
ENSG00000106624	AEBP1	165	1.37212	NA	1.65284	NA	0.490224	NA	2.70558	NA	1.71627	NA	0.490511	NA	-1.33346	NA	-0.063427	NA	-0.000287254	NA	ENSG00000106624
ENSG00000139154	AEBP2	121536	-0.00250377	0.990564	-0.193309	0.178388	0.0342344	0.954322	-0.255753	0.286182	-0.22821	0.391266	0.0338271	0.999548	0.253249	0.0412293	0.0349018	0.83674	0.000407261	0.999279	ENSG00000139154
ENSG00000181026	AEN	64782	0.752324	0.000428313	0.963218	3.68651e-06	0.306321	0.520576	0.0720862	0.89812	0.117687	0.831087	-0.00681821	0.999548	0.680238	0.000195225	0.845531	4.15058e-06	0.31314	0.305116	ENSG00000181026
ENSG00000196526	AFAP1	60312	0.015858	0.941952	0.250034	0.128733	-0.175228	0.651531	-0.308779	0.245217	0.0362247	0.941538	-0.0864911	0.999548	0.324637	0.0143624	0.213809	0.14444	-0.0887365	0.772528	ENSG00000196526
ENSG00000157510	AFAP1L1	134265	0.426606	0.02664	0.20416	0.319435	0.112273	0.84702	-0.238447	0.501232	-0.0331589	0.95555	0.255165	0.999548	0.665053	2.60419e-06	0.237319	0.150708	-0.142892	0.64108	ENSG00000157510
ENSG00000169129	AFAP1L2	84632	-0.354953	0.0901767	-0.515668	0.00865791	0.0822679	0.906627	0.0317096	0.95403	-0.0010458	0.998569	0.274657	0.999548	-0.386662	0.0230552	-0.514622	0.00264899	-0.192389	0.53465	ENSG00000169129
ENSG00000130396	AFDN	4301	0.0572092	0.73698	0.105666	0.489317	-0.01853	0.97496	-0.414641	0.0402968	-0.203205	0.437062	-0.165087	0.999548	0.47185	1.33231e-05	0.308872	0.00776643	0.146557	0.471685	ENSG00000130396
ENSG00000172493	AFF1	4299	-0.595819	0.00390033	-0.206561	0.369617	-0.42505	0.248593	-0.117547	0.810313	0.136557	0.788022	-0.105423	0.999548	-0.478272	0.00707217	-0.343118	0.0728063	-0.319627	0.252617	ENSG00000172493
ENSG00000144218	AFF3	3899	1.34898	0.589031	0.661982	NA	-0.827373	NA	-0.176657	NA	0.720799	NA	-1.58724	NA	1.52564	NA	-0.058817	NA	0.759867	NA	ENSG00000144218
ENSG00000072364	AFF4	27125	-0.483277	0.00966039	-0.189672	0.36137	-0.139606	0.798666	-1.01295	5.48055e-05	-0.415832	0.207562	-0.174972	0.999548	0.529669	0.000709815	0.22616	0.212796	0.0353663	0.937832	ENSG00000072364
ENSG00000135537	AFG1L	246269	-0.307702	0.28798	0.017988	0.956941	-0.00784964	0.993907	-0.0914614	0.895093	-0.0485212	0.953708	-0.0363269	0.999548	-0.21624	0.435183	0.0665092	0.839	0.0284773	0.970646	ENSG00000135537
ENSG00000141385	AFG3L2	10939	0.324028	0.0161798	0.342061	0.0106179	0.101508	0.794174	-0.00719047	0.9859	0.013744	0.973652	-0.0322704	0.999548	0.331218	0.00294909	0.328317	0.00450313	0.133779	0.520229	ENSG00000141385
ENSG00000079557	AFM	173	1.80156	NA	2.02034	NA	-1.36788	NA	1.70797	NA	2.07913	NA	-0.685082	NA	0.0935911	NA	-0.0587879	NA	-0.6828	NA	ENSG00000079557
ENSG00000183077	AFMID	125061	-0.0709563	0.736855	0.00570693	0.979564	0.13306	0.772985	-0.00992889	0.984808	0.160026	0.680895	0.0734866	0.999548	-0.0610274	0.74732	-0.154319	0.397525	0.0595738	0.881517	ENSG00000183077
ENSG00000081051	AFP	174	-3.71094	0.049195	-1.95369	NA	0.113171	NA	-3.98303	NA	-2.20654	NA	-0.271552	0.999548	0.27209	0.868348	0.252848	0.886265	0.384724	NA	ENSG00000081051
ENSG00000119844	AFTPH	54812	-0.0838969	0.677002	-0.0155393	0.944298	-0.0893585	0.866554	-0.615709	0.00916509	-0.418236	0.131261	-0.228028	0.999548	0.531812	8.64967e-05	0.402697	0.00495011	0.138669	0.621781	ENSG00000119844
ENSG00000038002	AGA	175	0.8179	3.20156e-05	0.436095	0.0360075	-0.136768	0.833529	1.20912	7.71227e-06	0.728005	0.0198617	0.026942	0.999548	-0.391219	0.0246691	-0.291911	0.118208	-0.16371	0.631745	ENSG00000038002
ENSG00000157985	AGAP1	116987	-0.663695	0.000184051	-0.649337	0.000104377	-0.338344	0.263223	-0.755016	0.00140187	-0.509948	0.052296	-0.460254	0.797589	0.0913214	0.543575	-0.139389	0.359883	0.121911	0.642046	ENSG00000157985
ENSG00000135439	AGAP2	116986	-2.89502	0.0600125	-1.54811	0.187474	-0.404367	0.915994	-1.57433	NA	0.0816112	NA	0.981425	0.999548	-1.32068	0.174311	-1.62972	0.107362	-1.38579	0.364651	ENSG00000135439
ENSG00000133612	AGAP3	116988	-0.612986	0.00289522	-0.622846	0.00200445	-0.348231	0.392167	-0.762413	0.00878039	-0.59957	0.0657092	-0.550924	0.90109	0.149427	0.427032	-0.0232754	0.921397	0.202692	0.505535	ENSG00000133612
ENSG00000188234	AGAP4	119016	2.33403	NA	0.691147	NA	0.490309	NA	0.930793	NA	-0.247982	NA	-0.390057	NA	1.40323	NA	0.939129	NA	0.880366	NA	ENSG00000188234
ENSG00000172650	AGAP5	729092	2.33401	0.316302	2.57733	0.228036	2.22523	NA	2.82768	NA	2.45674	NA	2.9342	0.999548	-0.49367	0.602152	0.120584	0.911307	-0.708974	NA	ENSG00000172650
ENSG00000204149	AGAP6	414189	-1.46716	0.43511	-2.14825	0.230564	-1.38726	0.762261	-1.91885	0.409608	-2.70128	0.234121	-1.38996	0.999548	0.451682	0.155108	0.553033	0.0843542	0.00270705	0.997825	ENSG00000204149
ENSG00000204172	AGAP9	642517	1.37223	0.594748	0.691138	0.799865	0.490304	NA	0.349936	NA	1.7448	NA	-0.329002	0.999548	1.02229	0.299959	-1.05366	0.377198	0.819306	NA	ENSG00000204172
ENSG00000273540	AGBL1	123624	0.320169	NA	0.686483	NA	1.35827	NA	0.226609	NA	0.0239594	NA	0.598398	NA	0.09356	NA	0.662523	NA	0.759868	NA	ENSG00000273540
ENSG00000165923	AGBL2	79841	-0.204267	0.899039	-0.219519	0.875491	-0.59899	0.868473	0.371219	NA	0.366162	NA	-0.0147678	0.999548	-0.575486	0.499868	-0.585681	0.515624	-0.584222	0.717741	ENSG00000165923
ENSG00000146856	AGBL3	340351	-0.926873	0.310311	-1.30227	0.113841	-0.0318982	0.991116	-0.989318	0.498168	-1.50253	NA	0.020815	0.999548	0.0624455	0.933982	0.200259	0.783895	-0.0527132	0.977256	ENSG00000146856
ENSG00000186094	AGBL4	84871	0.507013	0.766028	-1.43669	NA	-0.662892	NA	0.75384	NA	-1.48536	NA	-0.539191	0.999548	-0.246828	0.864655	0.0486706	0.977309	-0.123701	NA	ENSG00000186094
ENSG00000084693	AGBL5	60509	-0.837893	4.33172e-07	-0.680349	1.65531e-05	0.0109067	0.9871	-0.395632	0.131069	-0.302433	0.291772	0.080621	0.999548	-0.442261	0.000238495	-0.377916	0.00262385	-0.0697144	0.818978	ENSG00000084693
ENSG00000204305	AGER	177	-0.273101	0.886666	0.0880955	0.956941	0.224765	0.96259	-0.56028	0.838114	0.545784	NA	0.356454	0.999548	0.287179	0.591528	-0.457688	0.418489	-0.131688	0.916758	ENSG00000204305
ENSG00000173744	AGFG1	3267	-1.40776	5.31796e-22	-1.12418	3.20063e-14	-0.0559758	0.931475	-0.980512	3.66078e-06	-0.569707	0.0216835	-0.306768	0.999548	-0.427247	0.00142913	-0.554477	4.03447e-05	0.250792	0.234673	ENSG00000173744
ENSG00000106351	AGFG2	3268	-0.353241	0.0726502	-0.728248	6.16067e-05	-0.401163	0.21777	0.168878	0.671288	0.0271511	0.965675	0.238681	0.999548	-0.522119	0.00080995	-0.755399	1.27006e-06	-0.639844	0.000745516	ENSG00000106351
ENSG00000164252	AGGF1	55109	0.119173	0.708746	0.225477	0.42883	0.18701	0.800694	0.224587	0.683374	0.433562	0.369464	0.122312	0.999548	-0.105413	0.690823	-0.208085	0.429001	0.0646984	0.912504	ENSG00000164252
ENSG00000006530	AGK	55750	0.376454	0.0030195	0.344002	0.00621706	0.208766	0.421459	0.307218	0.146769	0.336101	0.123935	0.157905	0.999548	0.0692361	0.607811	0.00790121	0.962773	0.0508617	0.862821	ENSG00000006530
ENSG00000162688	AGL	178	0.0107765	0.97698	0.007887	0.981264	-0.133366	0.868473	0.0196949	0.978249	0.00127619	0.998615	0.041464	0.999548	-0.00891838	0.975019	0.0066108	0.984069	-0.17483	0.704161	ENSG00000162688
ENSG00000116771	AGMAT	79814	0.0999683	0.588264	0.143649	0.404359	0.213635	0.516871	0.0469505	0.906428	-0.0913425	0.809698	0.0554925	0.999548	0.0530178	0.748116	0.234991	0.105231	0.158143	0.519417	ENSG00000116771
ENSG00000092847	AGO1	26523	-0.159114	0.361291	-0.912385	3.65531e-10	-0.156767	0.686363	-0.190935	0.527539	-0.286681	0.32033	-0.00899219	0.999548	0.0318216	0.848498	-0.625704	1.13563e-06	-0.147775	0.544883	ENSG00000092847
ENSG00000123908	AGO2	27161	0.330229	0.0103855	0.249205	0.0585427	0.171854	0.540808	0.251537	0.248834	0.312839	0.151895	0.177486	0.999548	0.0786917	0.531153	-0.0636343	0.647624	-0.0056324	0.987793	ENSG00000123908
ENSG00000126070	AGO3	192669	0.443493	0.00265588	0.322181	0.0323443	0.0829658	0.863798	-0.210026	0.461849	-0.092336	0.802209	0.0493272	0.999548	0.653519	1.06086e-07	0.414517	0.00153091	0.0336387	0.926685	ENSG00000126070
ENSG00000134698	AGO4	192670	-0.710062	0.0400377	-1.04156	0.00120203	-0.25505	0.765313	-0.341002	0.606166	-0.491695	0.424786	-0.100246	0.999548	-0.36906	0.167371	-0.54987	0.0390186	-0.154804	0.793733	ENSG00000134698
ENSG00000204310	AGPAT1	10554	-1.24789	9.58336e-08	-1.01074	1.39092e-05	-0.084614	0.931475	-0.713957	0.0525787	-0.394291	0.392706	0.0515237	0.999548	-0.53393	0.00709154	-0.616446	0.00235117	-0.136138	0.765401	ENSG00000204310
ENSG00000169692	AGPAT2	10555	-0.335322	0.237811	0.0956803	0.767707	0.114214	0.900863	-0.179824	0.754156	0.0693517	0.929847	0.497957	0.999548	-0.155497	0.541422	0.0263286	0.933354	-0.383743	0.269835	ENSG00000169692
ENSG00000160216	AGPAT3	56894	0.16342	0.445023	-0.0630197	0.785948	0.287921	0.443157	-0.0622753	0.892065	-0.0174911	0.975508	0.213365	0.999548	0.225696	0.154817	-0.0455286	0.825443	0.0745561	0.845773	ENSG00000160216
ENSG00000026652	AGPAT4	56895	3.29991	1.74465e-06	2.32745	0.00126899	2.17107	0.0449886	3.46039	0.00120931	2.48395	0.0429889	1.57804	0.999548	-0.160479	0.860705	-0.156507	0.873272	0.59303	0.677689	ENSG00000026652
ENSG00000155189	AGPAT5	55326	0.855704	1.91712e-06	0.761058	2.95884e-05	0.196664	0.687726	0.493897	0.0971541	0.663768	0.0244152	-0.0568792	0.999548	0.361807	0.02661	0.0972899	0.638084	0.253543	0.339065	ENSG00000155189
ENSG00000018510	AGPS	8540	0.623852	0.000588237	0.440728	0.0201403	-0.172253	0.736061	-0.0268552	0.958366	0.0662649	0.903869	-0.0713091	0.999548	0.650707	2.92226e-05	0.374463	0.0271139	-0.100944	0.792724	ENSG00000018510
ENSG00000106541	AGR2	10551	-1.44444	2.33849e-06	-0.496284	0.141565	-0.890075	0.065183	0.885613	0.0785672	0.707987	0.20868	0.308005	0.999548	-2.33005	1.54977e-19	-1.20427	6.7573e-06	-1.19808	0.000140087	ENSG00000106541
ENSG00000188157	AGRN	375790	1.75678	2.2167e-19	1.146	1.55079e-08	0.546678	0.113467	1.37207	9.75775e-07	0.986613	0.00161656	0.517051	0.999548	0.384712	0.0371429	0.159384	0.469142	0.0296268	0.95719	ENSG00000188157
ENSG00000135744	AGT	183	0.282541	0.909556	-0.161978	NA	0.237929	NA	2.63636	NA	-0.103597	NA	-1.44823	0.999548	-2.35382	0.280078	-0.058381	0.983875	1.68616	NA	ENSG00000135744
ENSG00000135049	AGTPBP1	23287	-0.802692	0.00438651	-0.360265	0.228178	-0.168028	0.845254	-0.522457	0.28189	-0.218429	0.739919	0.00832826	0.999548	-0.280234	0.270118	-0.141836	0.634049	-0.176356	0.733324	ENSG00000135049
ENSG00000144891	AGTR1	185	-0.98013	0.0300317	-0.388638	0.4203	-0.00662564	0.996426	1.04421	0.144094	0.677148	0.417307	0.248604	0.999548	-2.02434	1.69026e-08	-1.06579	0.00418909	-0.255229	0.75457	ENSG00000144891
ENSG00000177674	AGTRAP	57085	-0.594089	0.0601514	-0.753172	0.0142553	0.136193	0.897127	0.315586	0.617212	-0.010461	0.99145	0.130352	0.999548	-0.909676	0.000309723	-0.742711	0.00509297	0.00584112	0.994564	ENSG00000177674
ENSG00000172482	AGXT	189	3.70721	NA	0.691028	NA	0.490196	NA	3.61354	NA	0.749773	NA	0.451605	NA	0.0936776	NA	-0.0587456	NA	0.0385907	NA	ENSG00000172482
ENSG00000153207	AHCTF1	25909	0.469287	0.0106584	0.333855	0.0810175	0.12858	0.816761	-0.480875	0.0932958	-0.317855	0.358971	-0.177554	0.999548	0.950162	7.37852e-11	0.65171	2.04289e-05	0.306134	0.193897	ENSG00000153207
ENSG00000101444	AHCY	191	0.447155	0.00239672	0.228465	0.153304	0.114828	0.791995	0.432302	0.0589101	0.195876	0.525425	0.0758348	0.999548	0.0148526	0.932206	0.0325893	0.856356	0.0389927	0.909973	ENSG00000101444
ENSG00000168710	AHCYL1	10768	-0.279356	0.122306	-0.360968	0.0393157	-0.216103	0.57847	-0.307472	0.303783	-0.354066	0.2516	-0.00792354	0.999548	0.0281163	0.883419	-0.00690136	0.976025	-0.208179	0.410939	ENSG00000168710
ENSG00000158467	AHCYL2	23382	-0.116676	0.573293	-0.121681	0.54697	-0.0756689	0.903068	0.128999	0.74049	0.145992	0.724381	0.0217651	0.999548	-0.245675	0.12678	-0.267673	0.108948	-0.097434	0.786736	ENSG00000158467
ENSG00000126705	AHDC1	27245	-0.787816	0.0238066	-0.501039	0.165461	-0.2289	0.82575	-0.0922217	0.91736	0.0485963	0.965675	0.174857	0.999548	-0.695595	0.0148375	-0.549636	0.0716899	-0.403758	0.408795	ENSG00000126705
ENSG00000135541	AHI1	54806	-0.473316	0.0607041	-0.384179	0.133464	-0.108822	0.896564	-0.883359	0.0115452	-0.611582	0.136019	-0.282948	0.999548	0.410044	0.0512828	0.227403	0.34546	0.174126	0.691336	ENSG00000135541
ENSG00000124942	AHNAK	79026	1.07698	2.43721e-08	1.92334	1.68162e-24	-0.208977	0.700619	0.863686	0.00277152	1.36195	1.0936e-06	0.0694291	0.999548	0.213289	0.262989	0.561393	0.00160402	-0.278406	0.336031	ENSG00000124942
ENSG00000185567	AHNAK2	113146	-0.538688	0.147556	0.0573481	0.900469	-0.569236	0.425553	0.391538	0.579175	0.475676	0.499476	0.420024	0.999548	-0.930226	0.00136581	-0.418328	0.211336	-0.989261	0.00845299	ENSG00000185567
ENSG00000106546	AHR	196	-0.509503	0.0966503	-0.322149	0.298157	-0.419855	0.484134	-0.580771	0.24415	-0.187373	0.791522	-0.406501	0.999548	0.0712689	0.822874	-0.134776	0.681066	-0.0133532	0.987399	ENSG00000106546
ENSG00000063438	AHRR	57491	-0.128857	0.511081	0.0612341	0.759992	-0.123861	0.787184	-0.45597	0.0654727	-0.282571	0.337019	-0.16398	0.999548	0.327112	0.0123701	0.343805	0.0105561	0.0401194	0.909574	ENSG00000063438
ENSG00000100591	AHSA1	10598	0.0454021	0.764796	0.027777	0.857231	0.000361125	0.999341	0.0191492	0.95403	-0.0697054	0.81469	-0.0734032	0.999548	0.0262529	0.841706	0.0974823	0.430294	0.0737643	0.752658	ENSG00000100591
ENSG00000145192	AHSG	197	0.410411	NA	1.85341	NA	-0.471497	NA	0.316848	NA	1.9122	NA	-0.510009	NA	0.0935628	NA	-0.0587907	NA	0.0385124	NA	ENSG00000145192
ENSG00000111732	AICDA	57379	1.37218	NA	0.691121	NA	0.490289	NA	1.27862	NA	0.0286232	NA	-0.269545	NA	0.0935596	NA	0.662498	NA	0.759834	NA	ENSG00000111732
ENSG00000186063	AIDA	64853	-0.513313	0.809435	-0.325166	0.865629	-0.552238	0.928732	-0.921932	0.739889	-0.643947	0.821493	-0.671607	0.999548	0.408619	0.125258	0.318781	0.2734	0.119369	0.854902	ENSG00000186063
ENSG00000126878	AIF1L	83543	-1.01497	1.64823e-05	-1.34325	3.6718e-09	-0.227783	0.707223	-0.446115	0.300449	-0.654153	0.109365	-0.245305	0.999548	-0.568853	0.00648745	-0.689093	0.00114908	0.0175225	0.979504	ENSG00000126878
ENSG00000156709	AIFM1	9131	0.0962755	0.756316	0.0109705	0.974332	-0.0223323	0.984118	0.115123	0.846201	-0.0334903	0.967185	-0.0672947	0.999548	-0.0188479	0.949489	0.0444608	0.880387	0.0449624	0.940246	ENSG00000156709
ENSG00000042286	AIFM2	84883	-0.348822	0.00206958	-0.346095	0.00211705	-0.17057	0.483944	-0.0845657	0.739938	-0.165668	0.470601	0.0206789	0.999548	-0.264256	0.00692647	-0.180427	0.0899479	-0.191249	0.201685	ENSG00000042286
ENSG00000183773	AIFM3	150209	1.37221	0.612331	0.691124	NA	2.92442	NA	2.26204	NA	2.39524	NA	3.54226	NA	-0.889827	NA	-1.70412	NA	-0.61784	NA	ENSG00000183773
ENSG00000146416	AIG1	51390	0.115834	0.59091	0.161395	0.416487	0.0156165	0.984118	0.913646	0.000183313	0.781992	0.0028088	0.317256	0.999548	-0.797812	6.09668e-08	-0.620596	3.9662e-05	-0.301639	0.187863	ENSG00000146416
ENSG00000163568	AIM2	9447	-0.420148	0.641302	-0.432626	0.605263	-0.99844	0.530488	-0.376572	0.84222	-0.314589	NA	-0.415364	0.999548	-0.0435762	0.965765	-0.118038	0.90708	-0.583076	0.725005	ENSG00000163568
ENSG00000164022	AIMP1	9255	0.525347	0.000688292	0.809302	5.79443e-08	0.0581304	0.929605	0.529433	0.0240296	0.818847	0.000305079	0.0986266	0.999548	-0.00408579	0.981402	-0.00954484	0.96218	-0.0404962	0.912504	ENSG00000164022
ENSG00000106305	AIMP2	7965	-0.139475	0.417637	0.258492	0.101243	-0.0207781	0.975223	0.131348	0.684416	0.159989	0.62408	-0.0377013	0.999548	-0.270823	0.0409242	0.0985035	0.537767	0.0169232	0.967216	ENSG00000106305
ENSG00000110711	AIP	9049	-0.0693343	0.610372	-0.0839297	0.519468	0.0939984	0.763114	0.141215	0.525999	0.0563641	0.845507	0.166138	0.999548	-0.210549	0.0315169	-0.140294	0.19451	-0.0721395	0.73539	ENSG00000110711
ENSG00000129221	AIPL1	23746	1.37217	NA	-0.270685	NA	1.67636	NA	1.27857	NA	-0.211877	NA	1.6378	NA	0.0935932	NA	-0.0588085	NA	0.0385613	NA	ENSG00000129221
ENSG00000160224	AIRE	326	0.707134	0.824005	-1.50503	NA	-3.74795	NA	2.96447	NA	-0.40395	NA	-3.30459	NA	-2.25734	NA	-1.10109	NA	-0.443358	NA	ENSG00000160224
ENSG00000196581	AJAP1	55966	1.57399	0.319037	0.444073	0.806772	0.558792	NA	0.153214	NA	-1.83196	NA	-1.68878	0.999548	1.42078	0.514316	2.27603	0.259199	2.24758	NA	ENSG00000196581
ENSG00000232434	AJM1	389813	0.746621	0.0768097	0.800372	0.0439294	0.258927	0.834632	0.929043	0.150742	0.856966	0.209719	0.27088	0.999548	-0.182421	0.648277	-0.0565946	0.903671	-0.0119528	0.990622	ENSG00000232434
ENSG00000129474	AJUBA	84962	1.18167	5.46592e-12	1.34202	6.09298e-15	0.386572	0.248541	-0.227617	0.536261	-0.245875	0.51777	0.0765629	0.999548	1.40928	8.09068e-22	1.58789	7.47564e-28	0.310009	0.201685	ENSG00000129474
ENSG00000106992	AK1	203	-0.639104	0.00733005	-0.557259	0.0216441	-0.10672	0.898204	0.0319007	0.961209	-0.133065	0.824409	0.157562	0.999548	-0.671005	0.000807586	-0.424195	0.0512508	-0.264282	0.470498	ENSG00000106992
ENSG00000004455	AK2	204	0.131113	0.301725	0.323362	0.00378481	0.144268	0.572943	0.0121171	0.969703	0.0999525	0.698807	0.0725182	0.999548	0.118996	0.250653	0.223409	0.0258808	0.0717501	0.737878	ENSG00000004455
ENSG00000147853	AK3	50808	-0.320515	0.43311	-0.253141	0.543645	0.185934	0.874176	-0.364806	0.626227	-0.274926	0.7531	-0.0382143	0.999548	0.0442915	0.914517	0.0217852	0.962142	0.224149	0.748866	ENSG00000147853
ENSG00000162433	AK4	205	-0.0523999	0.900969	-0.0847586	0.826971	0.340544	0.645804	-0.535371	0.343673	-0.260023	0.727275	-0.149962	0.999548	0.482971	0.0939112	0.175265	0.622322	0.490506	0.260689	ENSG00000162433
ENSG00000154027	AK5	26289	-0.0817521	0.943189	0.679956	0.406513	1.33567	0.306716	1.28383	0.393903	1.70498	NA	1.54218	0.999548	-1.36558	0.0585603	-1.02503	0.166353	-0.206511	0.901686	ENSG00000154027
ENSG00000085231	AK6	102157402	0.369057	0.120047	0.577986	0.0101144	0.0117189	0.990894	-0.128949	0.806213	0.182674	0.733413	-0.218159	0.999548	0.498006	0.010091	0.395312	0.0560189	0.229878	0.520229	ENSG00000085231
ENSG00000140057	AK7	122481	-1.37985	0.103762	-1.81833	0.02377	-0.587554	0.779745	-0.034839	0.987869	-0.563829	NA	-0.47928	0.999548	-1.34501	0.099215	-1.2545	0.137318	-0.108273	0.959965	ENSG00000140057
ENSG00000165695	AK8	158067	-1.90617	NA	-0.673373	NA	0.765747	NA	0.75579	NA	2.14096	NA	2.01558	NA	-2.66196	NA	-2.81433	NA	-1.24983	NA	ENSG00000165695
ENSG00000155085	AK9	221264	-0.43209	0.207265	-0.186171	0.596174	-0.394095	0.551543	0.698652	0.206845	0.364101	0.578424	-0.0730229	0.999548	-1.13074	0.000108493	-0.550272	0.0680524	-0.321072	0.532747	ENSG00000155085
ENSG00000231824	AKAIN1	642597	1.37217	NA	0.691091	NA	0.490274	NA	1.27858	NA	0.749896	NA	-0.269582	NA	0.0935822	NA	-0.0588045	NA	0.759857	NA	ENSG00000231824
ENSG00000121057	AKAP1	8165	0.694084	1.53165e-06	0.853117	1.19639e-09	0.390437	0.100455	0.343624	0.153978	0.519671	0.0225819	0.2102	0.999548	0.35046	0.00363574	0.333447	0.00786659	0.180237	0.381556	ENSG00000121057
ENSG00000108599	AKAP10	11216	-0.459427	0.00744512	-0.449717	0.00730089	-0.142029	0.757527	-0.846758	0.000216065	-0.458823	0.0969061	-0.311412	0.999548	0.387331	0.00533508	0.00910666	0.965271	0.169383	0.511613	ENSG00000108599
ENSG00000023516	AKAP11	11215	0.281856	0.260637	0.304495	0.215424	0.121356	0.869796	0.084977	0.881286	0.204542	0.69605	-0.0701265	0.999548	0.196879	0.368196	0.0999527	0.698197	0.191483	0.625934	ENSG00000023516
ENSG00000131016	AKAP12	9590	0.591944	0.0931147	0.437326	0.229674	-0.193412	0.860576	0.135549	0.870038	0.102261	0.918299	-0.161198	0.999548	0.456395	0.132025	0.335065	0.317313	-0.0322142	0.973487	ENSG00000131016
ENSG00000170776	AKAP13	11214	0.296685	0.0676282	0.284488	0.0806251	-0.0931671	0.852171	0.0814252	0.828326	0.120201	0.752784	0.0237421	0.999548	0.21526	0.127909	0.164287	0.291409	-0.116909	0.680397	ENSG00000170776
ENSG00000186471	AKAP14	158798	1.37208	NA	0.691001	NA	0.490169	NA	1.99971	NA	1.47102	NA	1.17285	NA	-0.62763	NA	-0.780017	NA	-0.682681	NA	ENSG00000186471
ENSG00000197976	AKAP17A	8227	0.498453	0.000272644	0.464086	0.000550672	0.197786	0.5067	-0.563702	0.00338238	-0.0575713	0.875758	0.0391887	0.999548	1.06216	3.7873e-25	0.521657	2.08109e-06	0.158597	0.423681	ENSG00000197976
ENSG00000111254	AKAP3	10566	1.37214	NA	-0.270737	NA	0.507713	NA	4.11782	NA	2.62733	NA	4.02978	NA	-2.74569	NA	-2.89807	NA	-3.52207	NA	ENSG00000111254
ENSG00000147081	AKAP4	8852	3.3846	NA	3.81508	NA	0.513664	NA	3.29092	NA	3.87377	NA	-0.246258	NA	0.0936791	NA	-0.0586902	NA	0.759923	NA	ENSG00000147081
ENSG00000179841	AKAP5	9495	-0.765395	0.520256	-1.51628	0.167027	-0.592764	0.840694	-0.0152756	NA	-0.14587	NA	-0.201006	0.999548	-0.750119	0.410187	-1.37041	0.140778	-0.391758	0.84621	ENSG00000179841
ENSG00000151320	AKAP6	9472	-0.886121	0.117896	-0.959945	0.070835	0.201865	0.909798	0.513892	0.643065	-0.0275356	0.985554	0.482368	0.999548	-1.40001	0.00131551	-0.932409	0.0386784	-0.280503	0.769369	ENSG00000151320
ENSG00000118507	AKAP7	9465	-0.283747	0.366147	-0.117994	0.721569	0.0101277	0.992752	-0.273321	0.640688	0.0385802	0.965903	-0.166848	0.999548	-0.0104256	0.974448	-0.156574	0.607161	0.176976	0.739481	ENSG00000118507
ENSG00000105127	AKAP8	10270	0.572088	6.94503e-06	0.549783	1.57367e-05	0.119501	0.745134	0.231282	0.324793	0.365565	0.0971816	0.039824	0.999548	0.340807	0.00230772	0.184218	0.143734	0.0796774	0.758599	ENSG00000105127
ENSG00000011243	AKAP8L	26993	0.872871	0.000161588	1.13677	5.62975e-07	0.425351	0.374044	0.168098	0.752386	0.476584	0.27413	0.285106	0.999548	0.704773	0.000425107	0.660186	0.00144934	0.140245	0.766261	ENSG00000011243
ENSG00000127914	AKAP9	10142	1.19523	0.000207073	1.26995	8.00416e-05	0.182675	0.868118	0.552249	0.349401	0.83697	0.136841	0.0576624	0.999548	0.642981	0.0225393	0.432979	0.164907	0.125012	0.862393	ENSG00000127914
ENSG00000166452	AKIP1	56672	-0.745397	3.77666e-08	-0.537292	8.64766e-05	-0.161607	0.637946	0.00441001	0.990892	-0.118723	0.7246	-0.0371937	0.999548	-0.749807	2.35398e-10	-0.418569	0.000752863	-0.124413	0.608485	ENSG00000166452
ENSG00000174574	AKIRIN1	79647	0.510448	0.114704	0.539043	0.0931936	0.113995	0.928566	-0.0480009	0.955044	0.0628924	0.949538	-0.0643288	0.999548	0.558449	0.0372409	0.47615	0.096251	0.178323	0.7692	ENSG00000174574
ENSG00000135334	AKIRIN2	55122	-0.310246	0.0560638	0.222058	0.176017	0.211329	0.525232	-0.77017	0.000294528	-0.266511	0.363096	-0.106737	0.999548	0.459924	0.000402878	0.48857	0.000232165	0.318067	0.0952301	ENSG00000135334
ENSG00000106948	AKNA	80709	-0.521222	0.07017	0.0205457	0.950984	-0.00470359	0.996422	0.036051	0.959107	0.199795	0.711221	0.0526851	0.999548	-0.557273	0.00282566	-0.179249	0.416901	-0.0573887	0.907534	ENSG00000106948
ENSG00000162641	AKNAD1	254268	0.195347	0.894826	1.21465	0.25037	-0.608739	NA	0.48738	NA	1.18225	NA	0.800154	0.999548	-0.292033	0.813008	0.0323924	0.983159	-1.40889	NA	ENSG00000162641
ENSG00000117448	AKR1A1	10327	-0.346092	0.0471021	-0.43672	0.0101746	0.184398	0.661431	-0.0241922	0.958366	-0.297905	0.350759	-0.00209125	0.999548	-0.3219	0.0278201	-0.138815	0.421002	0.186489	0.469312	ENSG00000117448
ENSG00000085662	AKR1B1	231	0.139429	0.368821	-0.0908109	0.575638	-0.0187304	0.975498	0.113008	0.701636	0.161861	0.576159	0.164907	0.999548	0.0264211	0.862008	-0.252672	0.0421893	-0.183637	0.343023	ENSG00000085662
ENSG00000198074	AKR1B10	57016	-2.37439	1.63508e-10	-2.43337	1.21932e-11	-0.642945	0.359045	0.562099	0.495966	-0.631958	0.405711	-0.29771	0.999548	-2.93649	4.24487e-16	-1.80141	4.79312e-08	-0.345236	0.571443	ENSG00000198074
ENSG00000227471	AKR1B15	441282	-2.86564	NA	-0.625597	NA	-2.17252	NA	0.483869	NA	2.87629	NA	-1.8643	NA	-3.34951	NA	-3.50188	NA	-0.308213	NA	ENSG00000227471
ENSG00000187134	AKR1C1	1645	-0.767281	2.00014e-08	-0.895656	6.72037e-11	-0.655913	9.3489e-05	0.209076	0.44878	0.339481	0.187919	0.126662	0.999548	-0.976357	5.14994e-17	-1.23514	8.59363e-27	-0.782575	1.14914e-09	ENSG00000187134
ENSG00000151632	AKR1C2	1646	-0.343081	0.0320916	-0.143643	0.420092	-0.258156	0.425089	0.387527	0.122941	0.671362	0.00431938	0.164454	0.999548	-0.730608	1.04487e-08	-0.815005	2.52542e-10	-0.42261	0.0144603	ENSG00000151632
ENSG00000196139	AKR1C3	8644	-0.702731	3.71931e-08	-0.522447	7.92739e-05	-0.329739	0.14343	0.078499	0.804634	0.294286	0.228733	-0.0216268	0.999548	-0.78123	1.04042e-12	-0.816733	1.82699e-13	-0.308112	0.0545984	ENSG00000196139
ENSG00000198610	AKR1C4	1109	-0.467337	0.708962	0.174973	0.889755	-0.297999	0.94208	-0.0201638	0.993683	0.906364	NA	0.133157	0.999548	-0.447174	0.716609	-0.731391	0.567488	-0.431156	0.869206	ENSG00000198610
ENSG00000264006	AKR1C8P	340811	0.410392	NA	0.691093	NA	-0.471523	NA	1.92635	NA	3.80695	NA	0.0681768	NA	-1.51596	NA	-3.11586	NA	-0.5397	NA	ENSG00000264006
ENSG00000122787	AKR1D1	6718	-1.64606	NA	-0.407396	NA	-0.540329	NA	-1.7396	NA	-0.348562	NA	-0.578837	NA	0.0935418	NA	-0.0588336	NA	0.0385077	NA	ENSG00000122787
ENSG00000165568	AKR1E2	83592	-0.420195	NA	-1.52064	NA	-1.99638	NA	-1.02131	NA	0.00881718	NA	-1.28561	NA	0.601113	NA	-1.52946	NA	-0.710771	NA	ENSG00000165568
ENSG00000053371	AKR7A2	8574	-0.445498	0.0205371	-0.621013	0.000832451	-0.0197517	0.981246	0.112738	0.797711	0.0126594	0.982785	0.115938	0.999548	-0.558236	0.000427917	-0.633672	8.44777e-05	-0.13569	0.695272	ENSG00000053371
ENSG00000162482	AKR7A3	22977	0.595127	0.658315	0.21178	0.878787	0.605168	0.852171	0.79465	NA	0.232924	NA	0.616921	0.999548	-0.199523	0.832276	-0.0211438	0.984425	-0.0117533	0.9961	ENSG00000162482
ENSG00000211454	AKR7L	NA	-1.81019	0.398025	-1.52948	NA	-2.69211	NA	-0.76905	NA	-0.626253	NA	-1.89568	0.999548	-1.04114	0.388859	-0.903227	0.484411	-0.796433	NA	ENSG00000211454
ENSG00000142208	AKT1	207	-0.414379	0.00706161	-0.586925	6.68966e-05	-0.130836	0.755016	-0.166687	0.586702	-0.286308	0.295889	-0.256357	0.999548	-0.247692	0.0500439	-0.300616	0.0194665	0.125521	0.603021	ENSG00000142208
ENSG00000204673	AKT1S1	84335	0.245994	0.258053	0.315903	0.130326	0.349098	0.373233	0.32105	0.365413	0.212257	0.616345	0.235793	0.999548	-0.0750563	0.711944	0.103645	0.627573	0.113305	0.768126	ENSG00000204673
ENSG00000105221	AKT2	208	-0.577306	0.00027862	-0.15949	0.375084	-0.121995	0.792661	-0.354959	0.184815	-0.0324294	0.949874	0.0562767	0.999548	-0.222347	0.118473	-0.127061	0.43679	-0.178272	0.462192	ENSG00000105221
ENSG00000117020	AKT3	10000	-0.468161	0.596251	-0.228267	0.78915	-0.365886	0.868343	-0.901268	0.513459	-0.184617	NA	-0.820329	0.999548	0.433107	0.500521	-0.0436496	0.959378	0.454443	0.705133	ENSG00000117020
ENSG00000166971	AKTIP	64400	-0.221896	0.437793	-0.385814	0.120041	-0.442615	0.30961	-0.688036	0.0501792	-0.620803	0.0930659	-0.50069	0.999548	0.466139	0.00739158	0.234989	0.240278	0.0580751	0.903758	ENSG00000166971
ENSG00000148218	ALAD	210	-1.06832	2.70886e-06	-1.15093	1.27883e-07	-0.493423	0.194863	0.0501137	0.937965	-0.149094	0.793513	0.19045	0.999548	-1.11844	4.68953e-09	-1.00184	1.85152e-07	-0.683873	0.0046176	ENSG00000148218
ENSG00000023330	ALAS1	211	0.106934	0.529366	0.0442331	0.808485	-0.0831968	0.860576	0.0369748	0.92242	-0.062312	0.874321	-0.0900389	0.999548	0.0699594	0.635467	0.106545	0.479916	0.00684211	0.986824	ENSG00000023330
ENSG00000158578	ALAS2	212	0.410394	NA	1.66083	NA	2.03982	NA	0.316816	NA	1.71961	NA	1.27993	NA	0.0935776	NA	-0.0587848	NA	0.75989	NA	ENSG00000158578
ENSG00000163631	ALB	213	1.37213	NA	0.691056	NA	1.47546	NA	1.27851	NA	0.749822	NA	1.43688	NA	0.09362	NA	-0.0587666	NA	0.038585	NA	ENSG00000163631
ENSG00000170017	ALCAM	214	1.05877	2.94348e-06	1.20905	8.94609e-08	0.33721	0.516898	0.429322	0.303786	0.568709	0.17129	-0.0419333	0.999548	0.629451	0.00166851	0.640343	0.00193851	0.379144	0.229449	ENSG00000170017
ENSG00000161618	ALDH16A1	126133	-0.0735016	0.81363	-0.166157	0.55137	0.100635	0.909798	0.452385	0.271611	0.33844	0.480569	0.352323	0.999548	-0.525887	0.00972153	-0.504596	0.0172875	-0.251688	0.495599	ENSG00000161618
ENSG00000059573	ALDH18A1	5832	1.0148	0.0361068	0.773452	0.123405	0.392428	0.768464	0.634382	0.488578	0.642176	0.508165	0.105812	0.999548	0.380421	0.402141	0.131277	0.813716	0.286615	0.755381	ENSG00000059573
ENSG00000165092	ALDH1A1	216	-2.38913	0.129761	-1.22782	0.320775	-0.136244	NA	1.39167	NA	1.98858	NA	2.40564	0.999548	-3.7808	0.00847089	-3.2164	0.0330166	-2.54189	NA	ENSG00000165092
ENSG00000128918	ALDH1A2	8854	-2.68383	0.0062445	-2.18318	0.00413674	-1.04325	0.419344	-0.947561	0.600659	-0.600996	NA	-0.702408	0.999548	-1.73627	0.00345871	-1.58219	0.00762611	-0.340846	0.77473	ENSG00000128918
ENSG00000184254	ALDH1A3	220	-0.710601	0.00132396	-0.958183	7.23314e-06	-0.523777	0.149077	-0.440346	0.255645	-0.51048	0.198017	-0.248545	0.999548	-0.270254	0.191485	-0.447703	0.0281602	-0.275231	0.410474	ENSG00000184254
ENSG00000137124	ALDH1B1	219	0.207362	0.390501	0.277766	0.226388	0.165162	0.783926	0.115831	0.819089	0.232984	0.61162	0.0573876	0.999548	0.0915312	0.681496	0.0447814	0.862542	0.107774	0.810001	ENSG00000137124
ENSG00000144908	ALDH1L1	10840	0.410304	NA	-0.270771	NA	-0.471603	NA	1.76538	NA	1.23669	NA	0.938521	NA	-1.35507	NA	-1.50746	NA	-1.41012	NA	ENSG00000144908
ENSG00000136010	ALDH1L2	160428	-0.872119	0.0644853	-0.612045	0.174723	0.13649	0.933308	-0.176865	0.874981	-0.0416842	0.97559	0.457432	0.999548	-0.695254	0.0833488	-0.570361	0.180386	-0.320941	0.686738	ENSG00000136010
ENSG00000111275	ALDH2	217	-0.183889	0.457112	-0.41746	0.0598743	-0.0776289	0.929906	0.251359	0.561857	0.276407	0.534019	0.131085	0.999548	-0.435247	0.0195674	-0.693867	0.000173631	-0.208714	0.545625	ENSG00000111275
ENSG00000108602	ALDH3A1	218	-1.40482	1.35036e-07	-1.5112	1.62266e-08	-0.607876	0.221962	-0.0461709	0.953029	-0.286088	0.647677	0.125528	0.999548	-1.35865	3.35324e-09	-1.22511	1.90413e-07	-0.733405	0.0199879	ENSG00000108602
ENSG00000072210	ALDH3A2	224	-0.315269	0.0119872	-0.468098	0.000115661	-0.295377	0.155411	-0.0609721	0.840169	-0.222981	0.345278	-0.0269619	0.999548	-0.254297	0.0187491	-0.245117	0.0299726	-0.268415	0.0721129	ENSG00000072210
ENSG00000006534	ALDH3B1	221	-0.878149	0.000866156	-0.849372	0.00137463	-0.0280774	0.981365	0.0347874	0.962649	-0.220553	0.73016	0.0982223	0.999548	-0.912937	4.20259e-05	-0.628819	0.00801093	-0.1263	0.824885	ENSG00000006534
ENSG00000132746	ALDH3B2	222	-0.625028	NA	-1.3061	NA	0.293796	NA	2.48045	NA	-0.013381	NA	0.79445	NA	-3.10548	NA	-1.29272	NA	-0.500654	NA	ENSG00000132746
ENSG00000159423	ALDH4A1	8659	-0.32795	0.219552	-0.458902	0.0645936	-0.0714146	0.94208	0.527971	0.200937	0.438213	0.339971	0.194172	0.999548	-0.855921	3.94311e-05	-0.897115	2.14009e-05	-0.265587	0.48134	ENSG00000159423
ENSG00000112294	ALDH5A1	7915	0.0309237	0.945547	-0.142558	0.724202	0.168626	0.876636	0.537906	0.356653	0.314647	0.666783	0.197908	0.999548	-0.506983	0.0790431	-0.457205	0.138071	-0.0292825	0.975073	ENSG00000112294
ENSG00000119711	ALDH6A1	4329	-1.36837	7.56059e-09	-0.985283	4.04222e-05	-0.13723	0.86436	-0.255247	0.637864	-0.09847	0.890911	0.093501	0.999548	-1.11312	2.82501e-07	-0.886813	6.55129e-05	-0.230731	0.590807	ENSG00000119711
ENSG00000164904	ALDH7A1	501	0.0198495	0.91414	-0.188044	0.201949	0.116391	0.758966	0.326985	0.138961	0.201946	0.460745	0.115712	0.999548	-0.307136	0.00849367	-0.38999	0.000947321	0.00067933	0.998752	ENSG00000164904
ENSG00000118514	ALDH8A1	64577	2.33404	NA	1.65295	NA	1.4435	NA	-0.0553653	NA	-0.941658	NA	-0.167552	NA	2.3894	NA	2.59461	NA	1.61105	NA	ENSG00000118514
ENSG00000143149	ALDH9A1	223	0.103461	0.553567	0.0416608	0.823986	0.0734548	0.880317	0.188067	0.517918	0.168663	0.591526	0.0303628	0.999548	-0.0846061	0.569818	-0.127002	0.402187	0.043092	0.898831	ENSG00000143149
ENSG00000149925	ALDOA	226	0.418808	0.00417632	0.279663	0.0698087	0.0692747	0.892982	0.355481	0.134505	0.284393	0.297764	0.212468	0.999548	0.0633262	0.678556	-0.0047303	0.982162	-0.143193	0.545625	ENSG00000149925
ENSG00000136872	ALDOB	229	1.95196	0.330436	1.88268	NA	1.39926	NA	0.865372	NA	3.38553	NA	0.830046	NA	1.08658	NA	-1.50285	NA	0.569214	NA	ENSG00000136872
ENSG00000109107	ALDOC	230	-0.756711	0.0785058	-0.995539	0.0166956	-0.423341	0.689009	0.283914	0.758508	0.330591	0.739462	0.0187358	0.999548	-1.04063	0.00305384	-1.32613	0.000196059	-0.442077	0.489868	ENSG00000109107
ENSG00000033011	ALG1	56052	1.06367	2.643e-07	0.823069	0.00010938	0.181968	0.768671	1.18223	5.72669e-05	0.790069	0.0198427	0.239416	0.999548	-0.118564	0.588971	0.0330006	0.900651	-0.0574485	0.908647	ENSG00000033011
ENSG00000139133	ALG10	84920	0.489573	0.0981164	0.390471	0.184414	0.165981	0.849483	1.01811	0.011744	1.01619	0.0167306	0.543483	0.999548	-0.528537	0.0275707	-0.625715	0.0102782	-0.377503	0.326543	ENSG00000139133
ENSG00000175548	ALG10B	144245	0.282724	0.443664	-0.469164	0.177312	-0.21485	0.82575	1.01364	0.0332921	0.432058	0.509966	0.134274	0.999548	-0.730917	0.00641115	-0.901222	0.000932187	-0.349125	0.459902	ENSG00000175548
ENSG00000253710	ALG11	440138	0.757767	0.000379839	0.712732	0.000642111	-0.0804682	0.929681	0.738276	0.0220689	0.48734	0.19648	0.0467507	0.999548	0.0194915	0.939134	0.225392	0.287805	-0.127219	0.767945	ENSG00000253710
ENSG00000182858	ALG12	79087	0.995519	2.41819e-10	0.81521	1.86373e-07	0.486785	0.0486326	0.754171	0.000629961	0.199445	0.539742	0.224927	0.999548	0.241348	0.0630967	0.615765	3.90576e-07	0.261858	0.164667	ENSG00000182858
ENSG00000101901	ALG13	79868	0.41856	0.0347092	0.661437	0.000463984	0.295123	0.470614	0.0904314	0.846524	0.398483	0.257255	-0.0721418	0.999548	0.328128	0.0556647	0.262954	0.157446	0.367265	0.133962	ENSG00000101901
ENSG00000172339	ALG14	199857	0.112862	0.612331	0.451144	0.0108937	0.081984	0.894017	0.0590612	0.899241	0.360855	0.258854	0.0051496	0.999548	0.0538009	0.776261	0.0902886	0.641472	0.0768344	0.842284	ENSG00000172339
ENSG00000251287	ALG1L2	644974	1.3722	NA	0.69112	NA	0.490331	NA	1.27866	NA	0.749967	NA	-1.63232	NA	0.0935396	NA	-0.0588471	NA	2.12265	NA	ENSG00000251287
ENSG00000119523	ALG2	85365	0.765835	5.73247e-07	0.703856	4.0553e-06	-0.0819143	0.880044	0.701279	0.00180322	0.525604	0.0366877	0.123723	0.999548	0.0645562	0.697412	0.178252	0.251722	-0.205637	0.376361	ENSG00000119523
ENSG00000214160	ALG3	10195	0.818219	1.06759e-09	0.796215	4.07987e-09	0.235333	0.427519	1.11502	1.55652e-09	0.87912	8.83125e-06	0.318331	0.999548	-0.296803	0.0156963	-0.0829048	0.588316	-0.082998	0.767034	ENSG00000214160
ENSG00000120697	ALG5	29880	1.17509	1.0529e-06	1.04371	1.98809e-05	0.0844432	0.935503	0.819371	0.030486	0.605158	0.17173	-0.0640559	0.999548	0.35572	0.119045	0.438549	0.0589702	0.148499	0.766729	ENSG00000120697
ENSG00000088035	ALG6	29929	0.34921	0.115581	0.232717	0.306441	0.179758	0.75328	0.923238	0.0012348	0.752897	0.0167306	0.27001	0.999548	-0.574028	0.000681172	-0.520179	0.0029831	-0.0902517	0.833823	ENSG00000088035
ENSG00000159063	ALG8	79053	0.836107	2.85708e-06	0.641368	0.000502383	0.0244648	0.975946	1.01701	5.48861e-05	0.72661	0.0114301	0.114695	0.999548	-0.180903	0.301066	-0.0852414	0.68105	-0.0902304	0.81929	ENSG00000159063
ENSG00000086848	ALG9	79796	3.02878	0.188465	0.691147	NA	-0.471487	NA	2.1809	NA	-0.473017	NA	-0.722808	NA	0.847882	NA	1.16416	NA	0.251321	NA	ENSG00000086848
ENSG00000171094	ALK	238	0.410531	NA	-0.27056	NA	-0.471347	NA	-0.404234	NA	-0.211613	NA	-2.68781	NA	0.814764	NA	-0.0589475	NA	2.21646	NA	ENSG00000171094
ENSG00000196711	ALKAL1	389658	1.37218	NA	0.691091	NA	0.490259	NA	0.557275	NA	0.749896	NA	0.451728	NA	0.814907	NA	-0.0588045	NA	0.0385318	NA	ENSG00000196711
ENSG00000189292	ALKAL2	285016	1.37212	NA	0.691061	NA	2.6381	NA	1.27851	NA	0.0285075	NA	2.5995	NA	0.0936157	NA	0.662554	NA	0.0385988	NA	ENSG00000189292
ENSG00000100601	ALKBH1	8846	0.497233	0.00315446	0.53477	0.00113158	0.12318	0.806087	0.385608	0.180944	0.456233	0.116518	-0.0976899	0.999548	0.111625	0.53254	0.0785371	0.695051	0.22087	0.398841	ENSG00000100601
ENSG00000189046	ALKBH2	121642	-0.375393	0.019888	-0.00527511	0.979564	0.350114	0.173783	-0.317301	0.232635	-0.408661	0.112583	-0.0924029	0.999548	-0.0580911	0.717945	0.403386	0.00233208	0.442517	0.00718239	ENSG00000189046
ENSG00000166199	ALKBH3	221120	-1.14406	1.45898e-06	-0.460601	0.0241172	0.312257	0.394668	-1.68839	3.78207e-09	-1.20055	3.93361e-06	-0.170494	0.999548	0.544323	0.000230458	0.739947	3.38065e-07	0.482751	0.0137854	ENSG00000166199
ENSG00000160993	ALKBH4	54784	0.395143	0.05097	0.324559	0.108366	0.357461	0.328063	0.414103	0.20709	0.110456	0.817969	0.435052	0.999548	-0.01896	0.934197	0.214102	0.262455	-0.0775912	0.857673	ENSG00000160993
ENSG00000091542	ALKBH5	54890	-0.0183673	0.918068	0.129843	0.368664	0.0767732	0.852171	-0.707738	5.29065e-05	-0.502907	0.0102064	-0.358278	0.884694	0.689371	1.86914e-11	0.63275	1.53452e-09	0.435051	0.000893	ENSG00000091542
ENSG00000239382	ALKBH6	84964	-0.627998	0.000640753	-0.720298	4.74582e-05	-0.21196	0.620935	0.128372	0.760777	0.135851	0.763997	0.0105566	0.999548	-0.75637	9.57927e-07	-0.856149	3.82989e-08	-0.222517	0.412904	ENSG00000239382
ENSG00000125652	ALKBH7	84266	-0.105519	0.724378	-0.0945089	0.751844	0.32975	0.519437	0.770282	0.0330595	0.41426	0.361661	0.459905	0.999548	-0.875801	1.20437e-05	-0.508769	0.0172295	-0.130155	0.786874	ENSG00000125652
ENSG00000137760	ALKBH8	91801	-0.618208	0.0182907	-0.57876	0.0220619	-0.344346	0.516726	-1.23144	0.000378108	-1.26046	0.000401529	-0.547077	0.999548	0.613237	0.00325054	0.681696	0.00130519	0.20273	0.639661	ENSG00000137760
ENSG00000151360	ALLC	55821	0.410455	NA	-0.27062	NA	-0.471452	NA	0.316926	NA	-0.211763	NA	-0.509932	NA	0.0935296	NA	-0.058857	NA	0.0384792	NA	ENSG00000151360
ENSG00000116127	ALMS1	7840	0.162817	0.302871	0.207594	0.165357	0.111728	0.779745	0.136674	0.646293	0.15986	0.591877	0.0547827	0.999548	0.0261431	0.867681	0.0477339	0.767657	0.056945	0.852547	ENSG00000116127
ENSG00000108839	ALOX12	239	2.33397	NA	3.20903	NA	0.490237	NA	-0.123878	NA	3.2678	NA	0.451701	NA	2.45785	NA	-0.0587684	NA	0.0385361	NA	ENSG00000108839
ENSG00000179477	ALOX12B	242	-2.17204	0.256674	-0.207809	NA	-0.381333	NA	-1.97777	NA	-0.161517	NA	0.192881	0.999548	-0.194268	0.890148	-0.0462918	0.977898	-0.574214	NA	ENSG00000179477
ENSG00000161905	ALOX15	246	1.37204	NA	1.65274	NA	1.47536	NA	1.99964	NA	2.43271	NA	2.158	NA	-0.6276	NA	-0.779972	NA	-0.682635	NA	ENSG00000161905
ENSG00000179593	ALOX15B	247	0.410428	NA	0.691159	NA	-0.471477	NA	1.0382	NA	-0.624818	NA	-0.509992	NA	-0.627773	NA	1.31598	NA	0.038515	NA	ENSG00000179593
ENSG00000012779	ALOX5	240	3.7543	NA	0.690986	NA	2.42382	NA	3.66059	NA	0.749701	NA	2.38517	NA	0.0937092	NA	-0.0587146	NA	0.0386518	NA	ENSG00000012779
ENSG00000132965	ALOX5AP	241	1.37217	NA	0.691091	NA	0.490274	NA	1.27858	NA	0.749896	NA	-0.269582	NA	0.0935822	NA	-0.0588045	NA	0.759857	NA	ENSG00000132965
ENSG00000179148	ALOXE3	59344	1.19231	0.522209	2.53488	0.11344	-0.877196	NA	1.03865	NA	1.12428	NA	-2.17647	0.999548	0.153657	0.948107	1.4106	0.452382	1.29928	NA	ENSG00000179148
ENSG00000163286	ALPG	251	1.04968	0.0788364	-0.391208	0.589217	-0.187271	0.939291	1.48336	0.0859542	0.412227	0.770425	1.01527	0.999548	-0.433687	0.390635	-0.803435	0.107367	-1.20254	0.0646639	ENSG00000163286
ENSG00000163295	ALPI	248	-2.55005	NA	-2.26934	NA	-1.84087	NA	-1.65711	NA	-1.21636	NA	-2.15491	NA	-0.892943	NA	-1.05298	NA	0.314034	NA	ENSG00000163295
ENSG00000073331	ALPK1	80216	-1.43488	0.00125803	-1.45005	0.000627584	-0.497308	0.609996	0.635225	0.454741	0.169693	0.888913	0.129784	0.999548	-2.0701	8.17053e-09	-1.61975	5.81165e-06	-0.627092	0.256389	ENSG00000073331
ENSG00000198796	ALPK2	115701	-2.42055	0.102471	-4.99604	0.00154516	-1.31889	0.558848	-1.47317	NA	-5.01768	NA	-1.73162	0.999548	-0.947383	0.327223	0.0216303	0.984988	0.412732	0.834582	ENSG00000198796
ENSG00000136383	ALPK3	57538	-1.83476	0.493447	-2.51585	NA	1.00784	NA	-1.87875	NA	-2.44709	NA	-0.0913235	NA	0.0439945	NA	-0.0687549	NA	1.09917	NA	ENSG00000136383
ENSG00000162551	ALPL	249	1.04463	0.000481061	0.607001	0.0573006	0.0199454	0.987951	1.15013	0.00890755	0.612631	0.271587	0.202345	0.999548	-0.105504	0.741246	-0.00563034	0.987692	-0.182399	0.757783	ENSG00000162551
ENSG00000163283	ALPP	250	0.422994	0.24231	-0.322206	0.388933	-0.648387	0.295802	1.5145	0.000776301	0.701754	0.232503	0.254382	0.999548	-1.09151	4.29666e-05	-1.02396	0.000198299	-0.902769	0.0103949	ENSG00000163283
ENSG00000003393	ALS2	57679	0.275459	0.119649	0.130721	0.484328	-0.0608566	0.927651	-0.0539488	0.897647	0.0460711	0.924017	-0.047338	0.999548	0.329408	0.0166367	0.0846504	0.629495	-0.0135186	0.977256	ENSG00000003393
ENSG00000178038	ALS2CL	259173	-0.545862	0.0487391	-1.07785	2.95037e-05	-0.370208	0.507925	0.0678353	0.921813	-0.0933168	0.903223	-0.0389626	0.999548	-0.613698	0.00437716	-0.984529	4.45627e-06	-0.331246	0.357924	ENSG00000178038
ENSG00000180318	ALX1	8092	-0.154828	0.735671	-0.0896213	0.845488	-0.237414	0.831553	0.940974	0.120669	0.570235	0.430823	0.180933	0.999548	-1.0958	0.000856821	-0.659857	0.056256	-0.418347	0.468249	ENSG00000180318
ENSG00000156150	ALX3	257	1.37217	NA	0.691091	NA	0.490274	NA	1.27858	NA	0.749896	NA	-0.269582	NA	0.0935822	NA	-0.0588045	NA	0.759857	NA	ENSG00000156150
ENSG00000052850	ALX4	60529	0.410455	NA	-0.27062	NA	-0.471452	NA	0.316926	NA	-0.211763	NA	-0.509932	NA	0.0935296	NA	-0.058857	NA	0.0384792	NA	ENSG00000052850
ENSG00000183684	ALYREF	10189	0.599584	1.07006e-05	0.497862	0.000369514	0.120487	0.763114	0.448735	0.0363804	0.550922	0.0122127	0.197633	0.999548	0.150849	0.25646	-0.0530598	0.747672	-0.0771464	0.790955	ENSG00000183684
ENSG00000242110	AMACR	23600	0.255948	0.174293	-0.233481	0.216333	-0.0767845	0.898204	0.622097	0.0185289	0.352069	0.286663	0.161922	0.999548	-0.366149	0.0237015	-0.58555	0.000266708	-0.238707	0.368321	ENSG00000242110
ENSG00000106927	AMBP	259	1.36992	0.138206	0.777903	0.428257	1.4381	0.376126	1.49142	0.27705	0.638136	NA	1.71671	0.999548	-0.121506	0.87257	0.139767	0.861576	-0.27861	0.852256	ENSG00000106927
ENSG00000110497	AMBRA1	55626	-0.265676	0.16263	-0.265651	0.157339	-0.0964619	0.866554	0.0335836	0.944286	-0.10829	0.803266	0.119412	0.999548	-0.29926	0.0518787	-0.157361	0.373063	-0.215874	0.399502	ENSG00000110497
ENSG00000123505	AMD1	262	-0.260396	0.260167	-0.317758	0.155179	0.0347271	0.971524	-0.783095	0.00893672	-0.634706	0.0588498	-0.243315	0.999548	0.522699	0.00266068	0.316948	0.0993541	0.278042	0.339065	ENSG00000123505
ENSG00000139344	AMDHD1	144193	-0.550222	0.630451	0.353073	0.722448	-0.375004	0.897555	-0.121639	NA	0.897956	NA	-0.293036	0.999548	-0.428583	0.645127	-0.544883	0.574973	-0.0819676	0.97352	ENSG00000139344
ENSG00000162066	AMDHD2	51005	-0.219476	0.454201	-0.73089	0.00360384	-0.0492215	0.96259	0.556456	0.176084	0.0196183	0.980964	0.351631	0.999548	-0.775931	0.000126823	-0.750509	0.000295746	-0.400853	0.201685	ENSG00000162066
ENSG00000184675	AMER1	139285	0.249409	0.239263	0.6	0.00113925	0.375138	0.280053	-0.44467	0.150319	0.0240257	0.968724	0.24083	0.999548	0.69408	5.95921e-06	0.575975	0.000301074	0.134307	0.697771	ENSG00000184675
ENSG00000165566	AMER2	219287	1.63436	0.612331	4.28871	NA	0.801345	NA	2.86743	NA	4.35025	NA	1.4078	NA	-1.23306	NA	-0.0615392	NA	-0.606459	NA	ENSG00000165566
ENSG00000178171	AMER3	205147	1.37218	NA	0.691091	NA	0.490259	NA	0.557275	NA	0.749896	NA	0.451728	NA	0.814907	NA	-0.0588045	NA	0.0385318	NA	ENSG00000178171
ENSG00000159461	AMFR	267	0.728429	1.94059e-06	0.414562	0.0103882	0.392727	0.136587	0.672048	0.00257284	0.403428	0.136111	0.256321	0.999548	0.0563814	0.729528	0.0111342	0.955435	0.136406	0.602163	ENSG00000159461
ENSG00000104899	AMH	268	0.949676	0.123343	1.34047	0.00992566	1.40935	0.0671152	0.432288	0.693522	0.587759	0.546253	0.731644	0.999548	0.517389	0.160037	0.752713	0.0357508	0.67771	0.192464	ENSG00000104899
ENSG00000135409	AMHR2	269	-1.08517	NA	-1.76624	NA	-1.96706	NA	-0.457315	NA	-2.40917	NA	-3.48433	NA	-0.627859	NA	0.642928	NA	1.51727	NA	ENSG00000135409
ENSG00000181754	AMIGO1	57463	0.096674	0.846586	-0.780307	0.0528064	0.385352	0.641085	0.271049	0.715751	-0.183216	0.839014	0.0593437	0.999548	-0.174375	0.551342	-0.597092	0.025661	0.326008	0.454644	ENSG00000181754
ENSG00000139211	AMIGO2	347902	1.21911	0.0778938	0.818046	0.260419	0.344756	0.8768	-1.00754	0.407234	-0.350527	0.834776	-0.613224	0.999548	2.22666	4.42994e-05	1.16857	0.0522561	0.95798	0.291708	ENSG00000139211
ENSG00000176020	AMIGO3	386724	1.34534	0.402646	0.0851969	0.96904	-0.98362	0.860576	0.993578	0.66796	-0.0315987	0.993584	-0.967973	0.999548	0.351759	0.316252	0.116796	0.787019	-0.0156478	0.988534	ENSG00000176020
ENSG00000101935	AMMECR1	9949	0.460663	0.00691331	0.445623	0.0090574	0.201434	0.623215	0.0167974	0.973168	0.181999	0.63434	-0.066843	0.999548	0.443866	0.00371246	0.263624	0.121378	0.268277	0.278035	ENSG00000101935
ENSG00000144233	AMMECR1L	83607	0.207944	0.308729	0.410329	0.0223455	-0.0600205	0.933639	-0.35109	0.259304	-0.485961	0.0984034	-0.371641	0.999548	0.559034	0.000168003	0.896289	6.07677e-10	0.31162	0.177544	ENSG00000144233
ENSG00000166126	AMN	81693	1.37224	NA	0.691221	NA	0.490363	NA	1.27877	NA	-1.97583	NA	-1.04605	NA	0.0934728	NA	2.66705	NA	1.53641	NA	ENSG00000166126
ENSG00000151743	AMN1	196394	-1.32376	2.17305e-06	-1.22361	4.41127e-06	-0.352687	0.551543	-0.488089	0.366729	-0.470392	0.401661	-0.345461	0.999548	-0.835672	0.00119355	-0.753219	0.00435165	-0.00722676	0.992439	ENSG00000151743
ENSG00000126016	AMOT	154796	1.3722	NA	1.65291	NA	2.60683	NA	1.27862	NA	1.00904	NA	0.924428	NA	0.0935876	NA	0.64388	NA	1.6824	NA	ENSG00000126016
ENSG00000166025	AMOTL1	154810	-0.133443	0.533859	0.0325408	0.890353	-0.312576	0.393245	-0.0910025	0.835492	-0.218569	0.565507	-0.044986	0.999548	-0.0424409	0.830331	0.251109	0.14458	-0.26759	0.282057	ENSG00000166025
ENSG00000114019	AMOTL2	51421	1.52421	2.372e-13	1.39468	4.41876e-11	0.132638	0.858431	0.244572	0.600543	0.407263	0.338475	0.186088	0.999548	1.27964	1.82275e-12	0.987419	1.47962e-07	-0.0534506	0.918354	ENSG00000114019
ENSG00000116748	AMPD1	270	1.37227	NA	0.691151	NA	0.490351	NA	-0.810708	NA	0.750046	NA	-1.06779	NA	2.18298	NA	-0.0588947	NA	1.55815	NA	ENSG00000116748
ENSG00000116337	AMPD2	271	-0.0919393	0.721726	0.0035367	0.990114	-0.131577	0.840694	-0.0932143	0.853475	-0.080287	0.891216	0.0899531	0.999548	0.00127499	0.995783	0.0838237	0.721848	-0.22153	0.491742	ENSG00000116337
ENSG00000133805	AMPD3	272	-0.524485	0.154011	-0.464727	0.191611	-0.218046	0.828039	0.135665	0.871636	0.00581709	0.994983	0.0254485	0.999548	-0.66015	0.0221314	-0.470544	0.129778	-0.243495	0.67869	ENSG00000133805
ENSG00000078053	AMPH	273	2.334	NA	0.691145	NA	1.47379	NA	1.51911	NA	-0.713771	NA	0.0980727	NA	0.814893	NA	1.40492	NA	1.37572	NA	ENSG00000078053
ENSG00000145020	AMT	275	1.3722	NA	0.691113	NA	1.44339	NA	2.59808	NA	1.29545	NA	2.3003	NA	-1.22589	NA	-0.604333	NA	-0.856907	NA	ENSG00000145020
ENSG00000187689	AMTN	401138	0.0669896	0.96443	0.297513	0.795898	1.17428	0.52507	0.901321	NA	1.54034	NA	0.884165	0.999548	-0.834331	0.337024	-1.24283	0.171369	0.290118	0.876362	ENSG00000187689
ENSG00000240038	AMY2B	280	1.37222	0.664233	0.69113	NA	0.490295	NA	2.1701	NA	1.35304	NA	0.139475	NA	-0.797884	NA	-0.661914	NA	0.35082	NA	ENSG00000240038
ENSG00000174945	AMZ1	155185	-1.09216	0.588888	-0.548269	NA	-2.01674	NA	1.31125	NA	0.507763	NA	-0.401088	0.999548	-2.40341	0.0696278	-1.05603	0.418489	-1.61566	NA	ENSG00000174945
ENSG00000196704	AMZ2	51321	-0.653407	5.16549e-06	-0.585709	1.95154e-05	-0.154176	0.652879	-0.502302	0.0152788	-0.472935	0.0274881	-0.274771	0.999548	-0.151104	0.203791	-0.112773	0.391448	0.120595	0.565117	ENSG00000196704
ENSG00000153107	ANAPC1	64682	0.328547	0.0499762	0.234457	0.171043	0.162202	0.695635	-0.334207	0.206427	-0.294399	0.313586	-0.16011	0.999548	0.662754	1.14768e-07	0.528855	4.68678e-05	0.322312	0.0811798	ENSG00000153107
ENSG00000164162	ANAPC10	10393	0.281756	0.353922	0.202967	0.501548	-0.276348	0.685983	-0.0149027	0.9859	0.0538497	0.951657	-0.519141	0.999548	0.296659	0.260704	0.149118	0.632202	0.242793	0.61513	ENSG00000164162
ENSG00000141552	ANAPC11	51529	-0.510212	0.0901473	-0.211975	0.525237	0.00980443	0.993907	-0.113345	0.873293	-0.161822	0.821408	-0.0800961	0.999548	-0.396867	0.125258	-0.0501534	0.884933	0.0899006	0.890261	ENSG00000141552
ENSG00000129055	ANAPC13	25847	-0.96601	1.84099e-06	-0.490001	0.019004	0.00130682	0.99873	-0.988325	0.00089074	-0.89887	0.00415611	-0.523652	0.999548	0.0223157	0.929191	0.408869	0.0346541	0.524959	0.0323808	ENSG00000129055
ENSG00000110200	ANAPC15	25906	-0.849075	1.20084e-06	-1.03327	1.12693e-09	-0.108593	0.842965	-0.296096	0.356457	-0.518163	0.0720069	-0.148702	0.999548	-0.552979	9.4864e-05	-0.515102	0.000414066	0.0401087	0.917523	ENSG00000110200
ENSG00000166295	ANAPC16	119504	-1.01498	4.29653e-06	-0.548302	0.0171977	0.0132482	0.989003	-0.427534	0.288061	-0.266653	0.580113	0.00576436	0.999548	-0.587449	0.00237068	-0.281649	0.200386	0.00748379	0.990016	ENSG00000166295
ENSG00000176248	ANAPC2	29882	0.190624	0.461272	0.0741626	0.793438	0.0852326	0.926457	0.488317	0.187875	0.465947	0.249063	0.242292	0.999548	-0.297693	0.139473	-0.391785	0.0548121	-0.157059	0.702951	ENSG00000176248
ENSG00000053900	ANAPC4	29945	-0.0554254	0.787674	-0.255308	0.129208	-0.0735576	0.892982	-0.237882	0.426103	-0.22363	0.489487	-0.17987	0.999548	0.182456	0.219405	-0.0316777	0.870908	0.106312	0.727848	ENSG00000053900
ENSG00000089053	ANAPC5	51433	-0.739177	1.21079e-19	-0.238366	0.00586543	-0.0514144	0.852171	-1.02434	1.17925e-21	-0.459856	0.000170756	-0.156422	0.999548	0.285159	5.07378e-05	0.221491	0.00277264	0.105008	0.399502	ENSG00000089053
ENSG00000196510	ANAPC7	51434	-0.263194	0.0076325	-0.160201	0.119039	-0.0902834	0.730557	-0.0105057	0.969785	0.0141658	0.965675	-0.0824497	0.999548	-0.252688	0.00228027	-0.174366	0.0504701	-0.00783379	0.977256	ENSG00000196510
ENSG00000214274	ANG	283	-0.761465	0.470117	-0.891084	0.359448	-0.462715	0.864994	0.362582	0.872007	0.639179	NA	-0.13062	0.999548	-1.12405	0.178125	-1.53026	0.0777389	-0.332095	0.860154	ENSG00000214274
ENSG00000013523	ANGEL1	23357	0.0926734	0.733565	-0.0665416	0.805965	0.166366	0.782934	0.350999	0.366729	0.196687	0.684245	-0.114802	0.999548	-0.258325	0.180805	-0.263228	0.194804	0.281168	0.338	ENSG00000013523
ENSG00000174606	ANGEL2	90806	-0.325248	0.139218	-0.779571	8.48003e-05	-0.420515	0.240848	-0.11974	0.802328	-0.524422	0.131975	-0.325253	0.999548	-0.205508	0.282736	-0.255149	0.195092	-0.0952617	0.827197	ENSG00000174606
ENSG00000154188	ANGPT1	284	-3.28239	0.0361068	0.283195	0.767707	-0.168206	0.962355	-2.91147	0.150319	0.721955	NA	-0.464831	0.999548	-0.370916	0.607052	-0.43876	0.562368	0.296626	0.842284	ENSG00000154188
ENSG00000091879	ANGPT2	285	0.410441	NA	2.43373	NA	-0.471485	NA	-0.638685	NA	1.10652	NA	-0.392322	NA	1.04913	NA	1.32721	NA	-0.0791623	NA	ENSG00000091879
ENSG00000101280	ANGPT4	51378	1.37208	NA	0.691001	NA	0.490169	NA	1.99971	NA	1.47102	NA	1.17285	NA	-0.62763	NA	-0.780017	NA	-0.682681	NA	ENSG00000101280
ENSG00000116194	ANGPTL1	9068	1.37196	NA	2.80825	NA	0.490046	NA	4.25943	NA	5.12675	NA	3.43257	NA	-2.88747	NA	-2.3185	NA	-2.94252	NA	ENSG00000116194
ENSG00000136859	ANGPTL2	23452	-1.16541	0.0370921	-0.553322	0.290576	-0.222534	0.884065	0.11566	0.931296	0.34001	0.759778	0.313026	0.999548	-1.28107	0.00050565	-0.893332	0.0198656	-0.53556	0.384026	ENSG00000136859
ENSG00000167772	ANGPTL4	51129	2.35689	1.63969e-06	1.38825	0.00842265	0.675931	0.579213	0.723155	0.465487	0.480829	0.688236	0.0608179	0.999548	1.63373	0.000155424	0.907421	0.059764	0.615114	0.445313	ENSG00000167772
ENSG00000187151	ANGPTL5	253935	1.3722	NA	0.691116	NA	0.490274	NA	1.25008	NA	1.15532	NA	2.14293	NA	0.122121	NA	-0.464204	NA	-1.65266	NA	ENSG00000187151
ENSG00000130812	ANGPTL6	83854	-1.25451	0.621276	0.505928	NA	0.456511	NA	-1.53921	NA	1.29917	NA	1.10122	NA	0.2847	NA	-0.793239	NA	-0.644711	NA	ENSG00000130812
ENSG00000171819	ANGPTL7	10218	0.410455	NA	-0.27062	NA	-0.471452	NA	0.316926	NA	-0.211763	NA	-0.509932	NA	0.0935296	NA	-0.058857	NA	0.0384792	NA	ENSG00000171819
ENSG00000130173	ANGPTL8	55908	1.37208	NA	0.691001	NA	0.490169	NA	1.99971	NA	1.47102	NA	1.17285	NA	-0.62763	NA	-0.780017	NA	-0.682681	NA	ENSG00000130173
ENSG00000227059	ANHX	647589	1.37213	NA	1.65283	NA	0.490224	NA	1.27851	NA	1.71158	NA	0.451655	NA	0.0936197	NA	-0.058752	NA	0.0385693	NA	ENSG00000227059
ENSG00000029534	ANK1	286	-0.605461	0.116482	-0.0786532	0.862065	-0.514767	0.501908	0.215428	0.794663	-0.0411828	0.970174	-0.0871935	0.999548	-0.820889	0.00590001	-0.0374704	0.929339	-0.427573	0.402843	ENSG00000029534
ENSG00000145362	ANK2	287	2.78075	NA	2.57164	NA	1.11192	NA	0.904609	NA	1.27015	NA	-0.53861	NA	1.87615	NA	1.3015	NA	1.65053	NA	ENSG00000145362
ENSG00000151150	ANK3	288	-0.850523	0.00337063	-0.621419	0.0354352	0.0713665	0.954933	-0.0777279	0.918367	-0.126763	0.869597	0.102074	0.999548	-0.772795	0.0012857	-0.494656	0.0572691	-0.0307073	0.968472	ENSG00000151150
ENSG00000151687	ANKAR	150709	-1.51351	0.00369731	-0.587228	0.17432	-0.22354	0.85409	-1.3414	0.0602937	-0.620688	0.41058	-0.271895	0.999548	-0.17211	0.650226	0.0334599	0.941341	0.0483554	0.959436	ENSG00000151687
ENSG00000166839	ANKDD1A	348094	1.00772	0.383841	0.508205	0.679295	0.648586	NA	1.68608	NA	2.13925	NA	1.38341	0.999548	-0.678369	0.573747	-1.63104	0.216788	-0.734827	NA	ENSG00000166839
ENSG00000189045	ANKDD1B	728780	1.37228	NA	-0.270603	NA	-0.471414	NA	-0.190805	NA	-0.211723	NA	-2.77871	NA	1.56309	NA	-0.0588801	NA	2.3073	NA	ENSG00000189045
ENSG00000132623	ANKEF1	63926	-0.580387	0.00508793	-0.853182	1.22656e-05	-0.160785	0.766859	-0.080454	0.877204	-0.457279	0.206177	0.0493848	0.999548	-0.499933	0.00484921	-0.395903	0.0333213	-0.21017	0.515074	ENSG00000132623
ENSG00000153930	ANKFN1	162282	-1.55045	0.00237792	-0.621838	0.150134	-0.310828	0.777384	-0.793575	0.339127	-0.424669	0.613544	-0.0295565	0.999548	-0.756875	0.0251422	-0.197168	0.62523	-0.281271	0.673813	ENSG00000153930
ENSG00000185722	ANKFY1	51479	0.558636	0.00135714	0.38958	0.0317358	0.0446461	0.954933	0.330299	0.285467	0.310433	0.358139	-0.0332052	0.999548	0.228337	0.156609	0.0791463	0.69021	0.0778513	0.839786	ENSG00000185722
ENSG00000154122	ANKH	56172	-0.607138	0.000823416	-0.316053	0.095458	-0.294725	0.425553	-0.147976	0.703824	-0.275317	0.431601	0.0108974	0.999548	-0.459162	0.00163328	-0.0407356	0.842787	-0.305622	0.168332	ENSG00000154122
ENSG00000131503	ANKHD1	54882	-0.145873	0.680697	0.10935	0.737831	-0.11243	0.907299	-0.362474	0.515889	0.137654	0.840438	0.0218377	0.999548	0.216601	0.41158	-0.0283042	0.933862	-0.134268	0.821373	ENSG00000131503
ENSG00000254996	ANKHD1-EIF4EBP3	404734	1.27648	0.0187598	0.545821	0.369879	0.496862	0.731002	1.43461	0.0726469	1.05048	NA	1.21586	0.999548	-0.158136	0.759598	-0.50466	0.305358	-0.718996	0.311444	ENSG00000254996
ENSG00000001629	ANKIB1	54467	-0.569346	0.00946771	-0.346555	0.123405	-0.533907	0.12077	-0.886665	0.00304175	-0.608862	0.0754799	-0.837401	0.134292	0.31732	0.0792809	0.262306	0.180866	0.303494	0.275243	ENSG00000001629
ENSG00000170209	ANKK1	255239	1.37216	NA	0.691053	NA	1.43997	NA	0.601735	NA	1.47116	NA	0.0894935	NA	0.770423	NA	-0.780109	NA	1.35047	NA	ENSG00000170209
ENSG00000160117	ANKLE1	126549	0.283205	0.247338	0.334691	0.149795	0.430798	0.281074	0.15245	0.755273	0.0695867	0.913969	0.0402959	0.999548	0.130755	0.541039	0.265104	0.197872	0.390502	0.148086	ENSG00000160117
ENSG00000176915	ANKLE2	23141	0.884082	1.02983e-06	0.476074	0.0137217	0.162748	0.761326	0.315803	0.353316	0.370397	0.288054	-0.0635258	0.999548	0.568279	0.000285942	0.105677	0.603856	0.226274	0.419333	ENSG00000176915
ENSG00000144504	ANKMY1	51281	-0.0791989	0.83947	0.590897	0.0242364	0.160011	0.847715	-0.501267	0.281526	-0.107054	0.870662	-0.150204	0.999548	0.422068	0.0325982	0.69795	0.000261968	0.310215	0.332647	ENSG00000144504
ENSG00000106524	ANKMY2	57037	-0.504063	0.00417632	0.00601093	0.979564	-0.0890153	0.878149	0.12271	0.761399	0.0945064	0.832701	-0.0250649	0.999548	-0.626772	4.20259e-05	-0.0884954	0.657458	-0.0639504	0.873757	ENSG00000106524
ENSG00000164331	ANKRA2	57763	-1.09978	0.00127614	-1.29532	4.70679e-05	-0.178803	0.849483	-0.861751	0.101633	-0.944906	0.0722105	-0.180078	0.999548	-0.238027	0.429586	-0.350413	0.24827	0.00127533	0.998887	ENSG00000164331
ENSG00000148677	ANKRD1	27063	2.03096	0.0748297	2.62213	0.0174724	0.554043	0.880159	-0.804126	0.743514	-0.741942	0.786066	-1.69311	0.999548	2.83508	0.00293743	3.36407	0.000495328	2.24715	0.107532	ENSG00000148677
ENSG00000088448	ANKRD10	55608	0.142247	0.481249	0.119845	0.544056	0.297929	0.364818	-0.0150093	0.975986	-0.111177	0.78919	0.108081	0.999548	0.157256	0.325025	0.231022	0.14909	0.189848	0.46322	ENSG00000088448
ENSG00000167522	ANKRD11	29123	-0.0253459	0.915763	0.367717	0.039767	-0.0535836	0.94208	-0.255359	0.430833	0.341981	0.274086	-0.081821	0.999548	0.230014	0.12797	0.0257355	0.900029	0.0282374	0.94536	ENSG00000167522
ENSG00000101745	ANKRD12	23253	0.0419878	0.910438	-0.0822212	0.814389	-0.0972799	0.931475	-0.550075	0.237777	-0.172003	0.799359	-0.169417	0.999548	0.592063	0.0103419	0.0897814	0.772322	0.0721369	0.907534	ENSG00000101745
ENSG00000076513	ANKRD13A	88455	-1.00222	7.47394e-07	-0.380121	0.0701603	-0.0205417	0.981566	-1.05497	0.000177791	-0.57617	0.079131	0.0148622	0.999548	0.0527504	0.804328	0.196049	0.317832	-0.035404	0.941559	ENSG00000076513
ENSG00000198720	ANKRD13B	124930	-0.346244	0.142819	0.149957	0.552628	0.190836	0.749937	-0.406341	0.280987	0.0528487	0.936609	-0.0199204	0.999548	0.0600971	0.790718	0.0971087	0.67873	0.210756	0.529722	ENSG00000198720
ENSG00000118454	ANKRD13C	81573	-0.239348	0.156144	-0.0711059	0.70633	-0.077769	0.878324	-0.573501	0.00972717	-0.343652	0.198952	-0.234755	0.999548	0.334153	0.00889731	0.272546	0.0446001	0.156986	0.50414	ENSG00000118454
ENSG00000172932	ANKRD13D	338692	0.00437864	0.98994	-0.230231	0.343402	0.170889	0.772985	-0.0912254	0.85854	-0.0463877	0.943277	0.0813398	0.999548	0.095604	0.61475	-0.183844	0.328759	0.0895494	0.821373	ENSG00000172932
ENSG00000134461	ANKRD16	54522	0.381282	0.116903	0.141289	0.594721	0.607686	0.0634774	-0.0782821	0.888299	-0.0593512	0.929791	0.0420823	0.999548	0.459564	0.0120778	0.200641	0.352351	0.565603	0.0162134	ENSG00000134461
ENSG00000132466	ANKRD17	26057	0.38767	0.000997515	0.383889	0.00118407	-0.0127906	0.981123	0.00549827	0.987222	0.114739	0.673221	-0.0508499	0.999548	0.382172	0.000132503	0.269151	0.0116381	0.0380593	0.889838	ENSG00000132466
ENSG00000180071	ANKRD18A	253650	1.30434	0.00133546	1.41467	0.000199674	-0.0168339	0.992752	0.535913	0.450975	1.11718	0.0558871	-0.135477	0.999548	0.768426	0.00432087	0.297483	0.358775	0.118644	0.87041	ENSG00000180071
ENSG00000230453	ANKRD18B	441459	0.272108	0.655049	0.414224	0.422273	0.00473423	0.998243	-0.398954	0.66533	0.017697	0.987817	-0.378926	0.999548	0.671062	0.0184727	0.396527	0.217453	0.38366	0.444943	ENSG00000230453
ENSG00000165887	ANKRD2	26287	-2.30867	0.247338	-1.09549	NA	1.31527	NA	-2.11953	NA	-0.575642	NA	1.66164	0.999548	-0.189147	0.894076	-0.51985	0.719043	-0.346365	NA	ENSG00000165887
ENSG00000260691	ANKRD20A1	84210	2.22004	NA	0.691146	NA	-0.471469	NA	2.12647	NA	0.0286478	NA	-1.23129	NA	0.0935625	NA	0.662498	NA	0.759825	NA	ENSG00000260691
ENSG00000183148	ANKRD20A2P	NA	1.37196	NA	0.690919	NA	0.490057	NA	3.3728	NA	1.37922	NA	2.54594	NA	-2.00083	NA	-0.688296	NA	-2.05588	NA	ENSG00000183148
ENSG00000172014	ANKRD20A4P	NA	-1.45821	NA	-1.1775	NA	-1.36712	NA	-3.47891	NA	-2.1362	NA	-2.14386	NA	2.0207	NA	0.958702	NA	0.776739	NA	ENSG00000172014
ENSG00000152766	ANKRD22	118932	-2.43881	0.327302	-2.88931	NA	-0.0224974	NA	0.215229	NA	0.638462	NA	0.960178	0.999548	-2.65404	0.226972	-3.52777	0.115113	-0.982675	NA	ENSG00000152766
ENSG00000163126	ANKRD23	200539	-0.734506	0.612331	-0.636067	0.607541	-1.67788	0.535289	0.306633	0.906795	-0.190347	NA	-1.90045	0.999548	-1.04114	0.0908682	-0.44572	0.518568	0.222574	0.875339	ENSG00000163126
ENSG00000089847	ANKRD24	170961	-1.09498	0.665878	0.138072	NA	1.95635	NA	1.67391	NA	0.324734	NA	2.45265	NA	-2.76889	NA	-0.186662	NA	-0.496298	NA	ENSG00000089847
ENSG00000107890	ANKRD26	22852	0.413507	0.127124	0.184293	0.531058	0.118244	0.891633	0.179146	0.74968	0.243459	0.663969	0.107191	0.999548	0.234362	0.310581	-0.0591665	0.840336	0.0110533	0.987607	ENSG00000107890
ENSG00000105186	ANKRD27	84079	-0.427177	0.0123719	-0.207979	0.24021	-0.0289625	0.968675	-0.6668	0.00377726	-0.449113	0.0875818	-0.166476	0.999548	0.239623	0.0788748	0.241134	0.0912258	0.137514	0.59312	ENSG00000105186
ENSG00000206560	ANKRD28	23243	-0.304451	0.0337923	-0.14107	0.360826	-0.0551422	0.918845	-0.623187	0.0012333	-0.484359	0.0243912	-0.21717	0.999548	0.318736	0.00659065	0.343289	0.00440937	0.162028	0.436923	ENSG00000206560
ENSG00000154065	ANKRD29	147463	-0.842874	0.0899534	-0.398526	0.451227	-0.0550851	0.978289	-0.447967	0.649646	-0.293892	0.797019	0.124181	0.999548	-0.394907	0.37074	-0.104634	0.84896	-0.179266	0.859854	ENSG00000154065
ENSG00000148513	ANKRD30A	91074	-0.486921	NA	-0.206217	NA	-0.38946	NA	0.145667	NA	1.30009	NA	-0.516755	NA	-0.632588	NA	-1.50631	NA	0.127295	NA	ENSG00000148513
ENSG00000180777	ANKRD30B	374860	0.410419	NA	1.3026	NA	1.46846	NA	0.31687	NA	0.640087	NA	0.70861	NA	0.0935481	NA	0.662512	NA	0.759854	NA	ENSG00000180777
ENSG00000163046	ANKRD30BL	554226	1.37213	NA	1.65283	NA	0.490224	NA	1.27851	NA	1.71158	NA	0.451655	NA	0.0936197	NA	-0.058752	NA	0.0385693	NA	ENSG00000163046
ENSG00000145700	ANKRD31	256006	-1.3045	0.284144	-1.1001	0.310118	-0.51916	0.860576	0.198556	NA	-0.0055663	NA	0.757482	0.999548	-1.50305	0.110924	-1.09454	0.25777	-1.27664	0.387628	ENSG00000145700
ENSG00000164236	ANKRD33B	651746	1.17777	4.18481e-09	1.04654	1.58823e-07	0.139786	0.839048	0.621813	0.0501792	0.444079	0.229262	0.104201	0.999548	0.555956	0.00096745	0.602463	0.000442635	0.0355842	0.942529	ENSG00000164236
ENSG00000272031	ANKRD34A	284615	-0.433916	0.599939	-0.916461	0.210744	-0.483373	0.797273	-0.438514	0.766955	-0.314205	NA	-0.675922	0.999548	0.00459818	0.994835	-0.602256	0.350339	0.192549	0.890261	ENSG00000272031
ENSG00000235711	ANKRD34C	390616	1.37208	NA	0.691001	NA	0.490169	NA	1.99971	NA	1.47102	NA	1.17285	NA	-0.62763	NA	-0.780017	NA	-0.682681	NA	ENSG00000235711
ENSG00000198483	ANKRD35	148741	1.37222	NA	0.691131	NA	0.490294	NA	1.51991	NA	1.45455	NA	1.06123	NA	-0.147689	NA	-0.763422	NA	-0.570941	NA	ENSG00000198483
ENSG00000135976	ANKRD36	375248	0.0892875	0.883996	-0.196991	0.719828	-0.158757	0.929605	0.0640053	0.956466	-0.163019	0.889936	-0.274631	0.999548	0.0252821	0.956749	-0.033972	0.944634	0.115874	0.894805	ENSG00000135976
ENSG00000196912	ANKRD36B	57730	-0.647386	0.299602	-0.655388	0.253465	-0.540274	0.678746	-0.823003	0.409813	-0.525031	0.649196	-0.629804	0.999548	0.175617	0.746406	-0.130358	0.832449	0.0895297	0.942529	ENSG00000196912
ENSG00000174501	ANKRD36C	400986	-0.10238	0.819793	-0.606896	0.0868365	-0.0987756	0.940023	-0.0446426	0.960702	-0.400133	0.560108	-0.0118536	0.999548	-0.0577376	0.868348	-0.206764	0.532944	-0.086922	0.904119	ENSG00000174501
ENSG00000186352	ANKRD37	353322	-0.00324556	0.99747	-0.111274	0.879175	-0.236804	0.911805	-0.896729	0.384829	-0.681413	0.562003	-0.478481	0.999548	0.893484	0.06565	0.570138	0.297817	0.241677	0.842284	ENSG00000186352
ENSG00000213337	ANKRD39	51239	-0.0667138	0.852269	-0.190358	0.544593	0.251796	0.724417	0.231078	0.689305	-0.0484534	0.956743	0.14713	0.999548	-0.297792	0.234657	-0.141905	0.631503	0.104666	0.859854	ENSG00000213337
ENSG00000154945	ANKRD40	91369	0.0918455	0.671189	0.0461228	0.837024	0.151813	0.756416	-0.383477	0.189346	-0.114232	0.791873	0.0347781	0.999548	0.475323	0.00115716	0.160354	0.362775	0.117035	0.723263	ENSG00000154945
ENSG00000137494	ANKRD42	338699	-0.196703	0.459175	-0.167149	0.507853	0.173151	0.770827	-1.17083	0.000170823	-0.934429	0.00530885	-0.568432	0.999548	0.974123	1.85803e-07	0.76728	8.26446e-05	0.741583	0.00181957	ENSG00000137494
ENSG00000065413	ANKRD44	91526	0.0328983	0.92672	-0.477933	0.0813502	-0.284251	0.653861	0.370661	0.506381	-0.205915	0.763997	0.219918	0.999548	-0.337763	0.238911	-0.272018	0.377173	-0.504168	0.225244	ENSG00000065413
ENSG00000186106	ANKRD46	157567	0.436931	0.0336076	-0.16651	0.470066	0.426994	0.201093	0.414	0.291808	-0.242488	0.614558	0.147493	0.999548	0.0229308	0.938834	0.0759778	0.792578	0.279501	0.459125	ENSG00000186106
ENSG00000168876	ANKRD49	54851	-0.386295	0.122778	-0.291501	0.2236	-0.106871	0.880374	-0.373463	0.350804	-0.224697	0.629894	-0.19668	0.999548	-0.012832	0.95888	-0.0668043	0.776777	0.0898094	0.839316	ENSG00000168876
ENSG00000151458	ANKRD50	57182	-0.209825	0.498714	-0.288334	0.326956	-0.353404	0.550118	-0.610891	0.158684	-0.38781	0.46649	-0.475699	0.999548	0.401066	0.0891153	0.0994766	0.744711	0.122295	0.830433	ENSG00000151458
ENSG00000139645	ANKRD52	283373	0.495906	0.000671188	0.0684085	0.712694	0.227169	0.474232	0.315987	0.210261	0.189165	0.546821	0.181156	0.999548	0.179919	0.196876	-0.120757	0.444018	0.0460136	0.894298	ENSG00000139645
ENSG00000144031	ANKRD53	79998	-0.0111327	0.995495	-1.02899	0.497689	-0.00129828	NA	-1.09124	NA	-1.50767	NA	0.0810895	0.999548	1.08011	0.33769	0.478679	0.73199	-0.0823878	NA	ENSG00000144031
ENSG00000100124	ANKRD54	129138	-0.421145	0.0190701	0.00418844	0.985675	0.0795354	0.891344	-0.516617	0.0511164	-0.523355	0.0534792	-0.125966	0.999548	0.0954715	0.575414	0.527543	0.000229475	0.205502	0.410964	ENSG00000100124
ENSG00000164512	ANKRD55	79722	-1.95523	NA	-0.937592	NA	-1.88119	NA	-0.826009	NA	-0.394915	NA	-2.1679	NA	-1.12922	NA	-0.542677	NA	0.286709	NA	ENSG00000164512
ENSG00000135299	ANKRD6	22881	-0.293589	NA	-0.974665	NA	-1.1755	NA	-0.387064	NA	-0.915753	NA	-1.21392	NA	0.0934747	NA	-0.058912	NA	0.0384243	NA	ENSG00000135299
ENSG00000157999	ANKRD61	100310846	1.85758	0.322834	1.24273	0.524624	1.42879	0.749343	1.97598	NA	0.64727	NA	1.0226	0.999548	-0.118402	0.903196	0.595461	0.483048	0.406188	0.81483	ENSG00000157999
ENSG00000181626	ANKRD62	342850	-0.488888	NA	-1.16997	NA	-1.37077	NA	1.4219	NA	0.893201	NA	-2.17251	NA	-1.91079	NA	-2.06317	NA	0.801734	NA	ENSG00000181626
ENSG00000230778	ANKRD63	100131244	-0.18291	0.82473	-0.944037	0.167955	-0.177434	0.942181	0.0999501	0.955122	-0.387984	NA	-0.761373	0.999548	-0.28286	0.674467	-0.556053	0.409415	0.583939	0.551464	ENSG00000230778
ENSG00000235098	ANKRD65	441869	1.37198	NA	0.690908	NA	1.43979	NA	2.70482	NA	2.17613	NA	2.82766	NA	-1.33284	NA	-1.48522	NA	-1.38787	NA	ENSG00000235098
ENSG00000156381	ANKRD9	122416	-0.0972942	0.832945	-0.456768	0.217052	-0.0495423	0.974608	0.774363	0.137185	0.189013	0.809698	0.177572	0.999548	-0.871658	0.000235293	-0.645781	0.0100124	-0.227114	0.645105	ENSG00000156381
ENSG00000064999	ANKS1A	23294	0.129037	0.38957	0.42908	0.000645118	0.129788	0.700619	-0.12629	0.648227	0.0701204	0.829529	0.0605453	0.999548	0.255327	0.024455	0.358959	0.00145718	0.069243	0.796835	ENSG00000064999
ENSG00000185046	ANKS1B	56899	-0.594348	0.711243	0.640969	0.618367	-0.191006	NA	-0.871606	NA	0.325415	NA	-0.384409	0.999548	0.277257	0.834387	0.315554	0.822875	0.193403	NA	ENSG00000185046
ENSG00000168096	ANKS3	124401	0.790109	0.00050496	0.405522	0.0954593	0.246815	0.675064	-0.0222854	0.972665	-0.177203	0.746637	-0.213554	0.999548	0.812395	5.88048e-06	0.582725	0.00212278	0.460369	0.0803566	ENSG00000168096
ENSG00000175311	ANKS4B	257629	2.33401	NA	0.691148	NA	1.47345	NA	0.813988	NA	-0.745662	NA	0.7136	NA	1.52003	NA	1.43681	NA	0.759849	NA	ENSG00000175311
ENSG00000165138	ANKS6	203286	0.366895	0.0822103	-0.0889866	0.721226	0.263632	0.547869	0.302928	0.399073	0.0259896	0.967445	0.253819	0.999548	0.0639668	0.747048	-0.114976	0.567235	0.00981286	0.985299	ENSG00000165138
ENSG00000206199	ANKUB1	389161	2.33385	NA	0.691011	NA	0.490164	NA	2.96147	NA	0.749711	NA	1.17285	NA	-0.627623	NA	-0.0586994	NA	-0.682688	NA	ENSG00000206199
ENSG00000163516	ANKZF1	55139	-0.44218	0.0770299	-0.400001	0.10997	0.0387653	0.972059	0.413996	0.326086	0.340738	0.477274	0.321341	0.999548	-0.856176	1.28299e-05	-0.740739	0.000261968	-0.282575	0.423376	ENSG00000163516
ENSG00000011426	ANLN	54443	0.16382	0.528779	0.193016	0.444676	-0.0760499	0.933308	0.033996	0.955935	0.256547	0.584098	-0.0766539	0.999548	0.129824	0.555419	-0.0635308	0.806024	0.000603955	0.999279	ENSG00000011426
ENSG00000131620	ANO1	55107	0.628786	NA	0.159198	NA	-1.01545	NA	1.25655	NA	-0.548071	NA	-0.332635	NA	-0.627767	NA	0.707268	NA	-0.682813	NA	ENSG00000131620
ENSG00000160746	ANO10	55129	0.492257	0.00531091	0.163226	0.415566	-0.23749	0.550118	0.649062	0.0106517	0.417187	0.173571	-0.0175832	0.999548	-0.156805	0.3401	-0.253961	0.12026	-0.219907	0.381556	ENSG00000160746
ENSG00000047617	ANO2	57101	0.410434	NA	-0.270642	NA	1.28786	NA	0.316899	NA	-0.21179	NA	0.528021	NA	0.0935346	NA	-0.0588521	NA	0.759837	NA	ENSG00000047617
ENSG00000134343	ANO3	63982	-0.493709	NA	0.777132	NA	1.54681	NA	0.763843	NA	0.854468	NA	1.82933	NA	-1.25755	NA	-0.077336	NA	-0.282523	NA	ENSG00000134343
ENSG00000151572	ANO4	121601	0.347603	0.416256	0.222449	0.597137	0.0521742	0.97496	0.0534443	0.955818	0.0691659	0.948498	0.267663	0.999548	0.294159	0.300798	0.153283	0.645533	-0.215489	0.708701	ENSG00000151572
ENSG00000177119	ANO6	196527	0.468186	0.00920369	0.323186	0.0831918	-0.143832	0.779745	0.107053	0.79483	-0.0938562	0.834883	-0.175671	0.999548	0.361133	0.0176609	0.417042	0.00721645	0.0318399	0.941133	ENSG00000177119
ENSG00000146205	ANO7	50636	0.189337	0.630483	0.590632	0.06374	0.696768	0.176867	0.550759	0.344087	0.372599	0.568013	0.12484	0.999548	-0.361422	0.230771	0.218033	0.509161	0.571928	0.145758	ENSG00000146205
ENSG00000074855	ANO8	57719	0.0231563	0.952171	-0.130059	0.686786	0.13966	0.868473	0.261114	0.63	0.23831	0.680895	0.224374	0.999548	-0.237958	0.292724	-0.368369	0.102301	-0.0847138	0.874009	ENSG00000074855
ENSG00000185101	ANO9	338440	1.29411	0.317495	0.319152	0.832312	-0.267017	NA	2.76214	NA	2.47718	NA	0.975767	0.999548	-1.46803	0.23615	-2.15803	0.11219	-1.24278	NA	ENSG00000185101
ENSG00000011201	ANOS1	3730	-0.775707	0.586031	-0.715697	0.577532	0.28661	NA	-1.77048	NA	-1.66351	NA	0.131141	0.999548	0.99477	0.365218	0.947812	0.420679	0.155469	NA	ENSG00000011201
ENSG00000140350	ANP32A	8125	-0.0852869	0.525457	0.0626527	0.64701	0.11071	0.713983	-0.122074	0.604053	-0.146219	0.531245	0.0646449	0.999548	0.0367875	0.759598	0.208871	0.041789	0.0460655	0.852287	ENSG00000140350
ENSG00000136938	ANP32B	10541	-0.221842	0.168232	-0.203154	0.211127	0.124822	0.76669	-0.460186	0.0410665	-0.47777	0.0451206	-0.0586898	0.999548	0.238344	0.0708884	0.274615	0.0424012	0.183512	0.402789	ENSG00000136938
ENSG00000139223	ANP32D	23519	-1.51023	NA	0.0977588	NA	0.619519	NA	-1.60379	NA	-2.17822	NA	0.580992	NA	0.0935616	NA	2.27598	NA	0.038527	NA	ENSG00000139223
ENSG00000143401	ANP32E	81611	0.0966763	0.616577	-0.315594	0.0591923	0.202032	0.586711	-0.116728	0.744226	-0.353379	0.219386	0.00188265	0.999548	0.213404	0.144921	0.0377849	0.844708	0.200149	0.399033	ENSG00000143401
ENSG00000166825	ANPEP	290	1.50494	1.74411e-05	0.178733	0.701317	-0.0762043	0.962884	0.599282	0.341976	0.773645	0.234835	0.269685	0.999548	0.905661	0.00139971	-0.594912	0.0574808	-0.345889	0.520765	ENSG00000166825
ENSG00000103254	ANTKMT	65990	-0.217157	0.405596	-0.0928193	0.743804	0.289964	0.571147	0.0522843	0.931296	0.0256639	0.971122	0.310271	0.999548	-0.269442	0.188731	-0.118483	0.628546	-0.0203066	0.974895	ENSG00000103254
ENSG00000169604	ANTXR1	84168	0.36774	0.0255676	0.032901	0.874454	0.285176	0.365483	-0.13848	0.686208	-0.354161	0.210823	-0.0166352	0.999548	0.506221	0.000108703	0.387062	0.00512903	0.301811	0.126139	ENSG00000169604
ENSG00000163297	ANTXR2	118429	3.64222	0.0112091	2.10501	0.181612	2.14233	0.49305	0.314172	0.936975	-0.778615	NA	-1.79624	0.999548	3.32805	0.0107008	2.88363	0.0371934	3.93857	0.0195559	ENSG00000163297
ENSG00000274209	ANTXRL	195977	0.410325	NA	-0.270755	NA	-0.471599	NA	2.00513	NA	1.47643	NA	1.89959	NA	-1.59481	NA	-1.74719	NA	-2.37118	NA	ENSG00000274209
ENSG00000135046	ANXA1	301	-0.334484	0.239263	-0.244885	0.406267	-0.34465	0.556238	-0.170002	0.770712	0.0726406	0.926349	-0.136979	0.999548	-0.164483	0.523613	-0.317526	0.207389	-0.207671	0.648681	ENSG00000135046
ENSG00000109511	ANXA10	11199	-0.0126511	0.967162	-0.254761	0.263986	-0.239419	0.640953	-0.152366	0.74097	-0.0896306	0.874747	-0.126087	0.999548	0.139715	0.4963	-0.165131	0.444813	-0.113332	0.788828	ENSG00000109511
ENSG00000122359	ANXA11	311	-0.314994	0.0154549	-0.190453	0.168668	-0.179853	0.52241	0.0351445	0.91736	0.0389547	0.918973	0.158096	0.999548	-0.350139	0.00121804	-0.229407	0.0506632	-0.33795	0.0182704	ENSG00000122359
ENSG00000104537	ANXA13	312	1.3722	NA	0.691123	NA	0.490338	NA	1.27866	NA	0.749975	NA	-1.79868	NA	0.0935344	NA	-0.0588522	NA	2.28902	NA	ENSG00000104537
ENSG00000182718	ANXA2	302	0.422888	0.0602645	0.152532	0.54977	-0.0769022	0.931648	0.153352	0.751248	0.179167	0.728392	-0.036959	0.999548	0.269535	0.173056	-0.0266354	0.919441	-0.0399431	0.939883	ENSG00000182718
ENSG00000177721	ANXA2R	389289	-2.54004	0.00574494	-0.398589	0.490509	0.710891	0.427519	-1.82856	0.125603	0.286293	0.798811	0.800328	0.999548	-0.711487	0.0355509	-0.684883	0.0499477	-0.0894368	0.917211	ENSG00000177721
ENSG00000138772	ANXA3	306	0.552971	0.0567552	0.106506	0.762945	0.00640088	0.99593	-0.264698	0.653805	-0.317778	0.59726	-0.220023	0.999548	0.817669	0.000516981	0.424284	0.10772	0.226424	0.645714	ENSG00000138772
ENSG00000196975	ANXA4	307	-0.660126	0.00588636	-0.654787	0.0065254	-0.355439	0.48942	0.113431	0.845924	-0.0134972	0.985139	0.0133859	0.999548	-0.773556	0.000132417	-0.64129	0.00243924	-0.368825	0.259567	ENSG00000196975
ENSG00000164111	ANXA5	308	-0.119665	0.518	-0.307971	0.0601764	-0.242148	0.468438	-0.154552	0.64044	-0.317891	0.268539	-0.0670232	0.999548	0.0348865	0.840183	0.00992003	0.960952	-0.175125	0.470109	ENSG00000164111
ENSG00000197043	ANXA6	309	-0.644983	0.0252453	-0.798513	0.00465207	-0.38081	0.544656	0.320583	0.578286	-0.0179465	0.982927	0.20743	0.999548	-0.965566	3.99995e-05	-0.780567	0.00146543	-0.588239	0.0863837	ENSG00000197043
ENSG00000138279	ANXA7	310	-0.0940618	0.393354	-0.0968193	0.37283	-0.0412499	0.907833	0.136528	0.461469	0.133036	0.502038	0.0240865	0.999548	-0.23059	0.00571513	-0.229855	0.00786332	-0.0653364	0.723549	ENSG00000138279
ENSG00000265190	ANXA8	653145	-0.77036	0.189195	-1.26473	0.0212871	-1.32816	0.132432	-0.286359	0.8239	-0.156886	0.922138	-0.693154	0.999548	-0.484001	0.336496	-1.10784	0.0221355	-0.635003	0.427038	ENSG00000265190
ENSG00000264230	ANXA8L1	728113	-0.0836318	0.910053	-0.979813	0.0948412	-1.16072	0.248541	0.366565	0.763281	-0.0189183	0.99146	-0.125845	0.999548	-0.450197	0.377967	-0.960894	0.0511351	-1.03488	0.127369	ENSG00000264230
ENSG00000143412	ANXA9	8416	-1.80824	0.0335998	-2.30046	0.00459717	-1.57076	0.233779	1.67849	0.31863	-0.615778	NA	0.123152	0.999548	-3.48673	0.000139333	-1.68468	0.0188475	-1.69391	0.0842804	ENSG00000143412
ENSG00000136250	AOAH	313	-3.0696	0.0749963	-0.372669	0.778284	-1.14137	NA	-2.6858	NA	-1.0921	NA	-0.935937	0.999548	-0.383806	0.752118	0.719434	0.517665	-0.205434	NA	ENSG00000136250
ENSG00000002726	AOC1	26	2.62591	NA	1.18933	NA	0.974048	NA	3.97182	NA	2.68763	NA	1.65366	NA	-1.34591	NA	-1.4983	NA	-0.679613	NA	ENSG00000002726
ENSG00000131480	AOC2	314	1.37223	0.581829	0.691148	0.793289	-0.471485	0.960493	0.135057	NA	-0.405152	NA	-1.10321	0.999548	1.23718	0.107494	1.0963	0.184903	0.631723	0.695134	ENSG00000131480
ENSG00000131471	AOC3	8639	2.33394	NA	0.691093	NA	0.490241	NA	3.01909	NA	-0.126273	NA	1.23044	NA	-0.685148	NA	0.817365	NA	-0.7402	NA	ENSG00000131471
ENSG00000148120	AOPEP	84909	0.651922	0.0426551	0.983642	0.00126673	0.267366	0.759202	0.228048	0.74049	0.433567	0.487617	0.0072703	0.999548	0.423874	0.125964	0.550074	0.0496499	0.260096	0.621781	ENSG00000148120
ENSG00000138356	AOX1	316	-0.671026	0.0279753	-0.646533	0.0286658	0.0922634	0.936228	-0.0547085	0.945401	-0.266238	0.685165	0.0580316	0.999548	-0.616317	0.0135012	-0.380295	0.16525	0.0342318	0.964054	ENSG00000138356
ENSG00000138660	AP1AR	55435	-0.444914	0.0730675	-0.832037	0.000267524	-0.170133	0.797279	-1.01349	0.0015834	-1.13794	0.000602382	-0.46245	0.999548	0.568574	0.00225533	0.305901	0.146106	0.292318	0.35476	ENSG00000138660
ENSG00000100280	AP1B1	162	-0.151331	0.399044	-0.144724	0.418021	-0.0400113	0.954568	0.0618672	0.873723	-0.00100393	0.998254	0.10795	0.999548	-0.213198	0.132984	-0.14372	0.365392	-0.147962	0.562193	ENSG00000100280
ENSG00000166747	AP1G1	164	0.283256	0.0479559	0.188114	0.211189	-0.0756823	0.868118	-0.0642929	0.848312	-0.0518772	0.897606	-0.0918591	0.999548	0.347549	0.00342319	0.239991	0.0622131	0.0161768	0.966361	ENSG00000166747
ENSG00000213983	AP1G2	8906	-0.359571	0.167635	-0.56721	0.0202161	-0.0720338	0.942181	0.275764	0.57328	-0.109609	0.863148	0.0819438	0.999548	-0.635334	0.00160198	-0.4576	0.0332977	-0.153978	0.733303	ENSG00000213983
ENSG00000072958	AP1M1	8907	-0.0329888	0.886806	-0.439924	0.0116565	0.0158498	0.983632	0.133483	0.724662	0.0274599	0.962634	0.268193	0.999548	-0.166472	0.308729	-0.467384	0.0020803	-0.252343	0.293185	ENSG00000072958
ENSG00000129354	AP1M2	10053	-0.540355	0.0331145	-0.183057	0.483519	-0.367225	0.431899	-0.114847	0.837284	-0.147612	0.783727	-0.188454	0.999548	-0.425507	0.0174068	-0.0354451	0.885865	-0.178771	0.606489	ENSG00000129354
ENSG00000106367	AP1S1	1174	-0.134329	0.553567	-0.177093	0.412428	0.0247992	0.975817	-0.00775992	0.987869	0.018185	0.976213	0.036676	0.999548	-0.126569	0.504163	-0.195278	0.305762	-0.0118768	0.983479	ENSG00000106367
ENSG00000182287	AP1S2	8905	-0.0218118	0.966347	-0.0709566	0.872443	-0.00151255	0.998759	-0.593797	0.333655	-0.357265	0.634463	-0.0666364	0.999548	0.571985	0.0592914	0.286309	0.418489	0.0651238	0.939063	ENSG00000182287
ENSG00000152056	AP1S3	130340	-0.227573	0.475523	-0.595201	0.0339443	-0.0811786	0.943295	-0.755235	0.0818471	-0.77691	0.093835	-0.196579	0.999548	0.527662	0.0328696	0.181709	0.548241	0.1154	0.852585	ENSG00000152056
ENSG00000196961	AP2A1	160	-0.0697784	0.774355	-0.0910676	0.699348	-0.0390323	0.96259	0.463856	0.131069	0.254294	0.516778	0.269335	0.999548	-0.533635	0.000846677	-0.345362	0.0464648	-0.308367	0.220438	ENSG00000196961
ENSG00000183020	AP2A2	161	-0.283891	0.0788712	-0.17466	0.300909	0.0835398	0.866587	-0.047075	0.905644	0.00531071	0.991445	0.164386	0.999548	-0.236816	0.0784786	-0.179971	0.221651	-0.0808464	0.79306	ENSG00000183020
ENSG00000006125	AP2B1	163	0.156279	0.0936729	0.0630917	0.54285	0.137693	0.457974	0.0253116	0.913102	-0.0675707	0.754929	0.0876693	0.999548	0.130968	0.0992919	0.130662	0.118423	0.0500239	0.780047	ENSG00000006125
ENSG00000161203	AP2M1	1173	-0.179728	0.144456	-0.386062	0.000634845	0.00598945	0.990894	-0.250043	0.189435	-0.501824	0.00337569	-0.0222158	0.999548	0.0703152	0.536986	0.115762	0.308474	0.0282052	0.914714	ENSG00000161203
ENSG00000042753	AP2S1	1175	-0.33656	0.311526	-0.386682	0.234639	0.060926	0.96259	-0.0823909	0.916355	-0.163575	0.827829	0.121044	0.999548	-0.25417	0.371744	-0.223107	0.472845	-0.0601176	0.932935	ENSG00000042753
ENSG00000132842	AP3B1	8546	0.23861	0.16007	0.137199	0.448804	-0.105875	0.829924	0.104416	0.769423	0.215119	0.508165	0.0841598	0.999548	0.134194	0.376502	-0.0779198	0.657169	-0.190035	0.4248	ENSG00000132842
ENSG00000103723	AP3B2	8120	-0.499556	NA	0.946084	NA	-1.38149	NA	-0.234673	NA	0.4963	NA	0.532289	NA	-0.264883	NA	0.449784	NA	-1.91378	NA	ENSG00000103723
ENSG00000065000	AP3D1	8943	-0.492692	0.00214712	-0.370943	0.0237624	-0.022417	0.97496	-0.477819	0.0509573	-0.238139	0.457749	0.0268095	0.999548	-0.0148729	0.935482	-0.132804	0.412662	-0.0492266	0.891559	ENSG00000065000
ENSG00000185009	AP3M1	26985	0.131377	0.403963	0.160832	0.28929	-0.126126	0.737983	0.0474743	0.893935	0.129269	0.684245	-0.0687712	0.999548	0.0839026	0.556079	0.0315629	0.853491	-0.0573546	0.854005	ENSG00000185009
ENSG00000070718	AP3M2	10947	-0.205417	0.300407	-0.619939	0.000305315	-0.136647	0.77944	0.202062	0.592243	-0.266884	0.463237	0.0387409	0.999548	-0.407479	0.0128677	-0.353055	0.0381266	-0.175388	0.564674	ENSG00000070718
ENSG00000177879	AP3S1	1176	-0.459075	0.147244	0.0957399	0.792629	0.0441764	0.973979	-0.509618	0.319631	0.0208925	0.98234	-0.0450472	0.999548	0.050543	0.873177	0.0748474	0.82286	0.0892236	0.890238	ENSG00000177879
ENSG00000157823	AP3S2	10239	-0.212906	0.548756	-0.322787	0.311986	-0.262273	0.732383	-0.258773	0.706446	-0.291489	0.679797	0.386323	0.999548	0.0458668	0.905238	-0.0312972	0.941567	-0.648596	0.16465	ENSG00000157823
ENSG00000134262	AP4B1	10717	-0.340495	0.0745269	-0.189972	0.34734	-0.311088	0.394966	-0.00310734	0.994338	-0.00110455	0.998254	-0.078085	0.999548	-0.337388	0.0328962	-0.188868	0.292546	-0.233003	0.371107	ENSG00000134262
ENSG00000081014	AP4E1	23431	0.207706	0.371893	0.171658	0.459019	-0.0188157	0.983632	-0.292216	0.453313	-0.201009	0.659363	-0.156418	0.999548	0.499922	0.00435788	0.372666	0.0477909	0.137603	0.726313	ENSG00000081014
ENSG00000221838	AP4M1	9179	-0.916171	0.00642373	-0.690918	0.0386304	-0.0345894	0.980927	0.397888	0.5521	0.0955896	0.921098	0.239513	0.999548	-1.31406	1.16465e-06	-0.786508	0.0055642	-0.274103	0.612949	ENSG00000221838
ENSG00000100478	AP4S1	11154	-1.58533	3.23999e-05	-1.58	6.64134e-06	-0.0816091	0.954568	-1.35247	0.0152696	-1.67853	0.00139466	-0.13872	0.999548	-0.232859	0.513699	0.0985252	0.810436	0.0571108	0.948182	ENSG00000100478
ENSG00000254470	AP5B1	91056	-0.412683	0.144456	-0.33119	0.245479	-0.0109165	0.992667	0.096038	0.883279	0.321593	0.555832	0.200715	0.999548	-0.508721	0.0237732	-0.652783	0.00414395	-0.211632	0.636928	ENSG00000254470
ENSG00000053770	AP5M1	55745	-0.771378	1.96559e-05	-0.401064	0.0290258	-0.492682	0.0719222	-0.845873	0.00091589	-0.574425	0.043961	-0.456364	0.999548	0.0744949	0.686696	0.173361	0.329642	-0.0363181	0.932379	ENSG00000053770
ENSG00000125843	AP5S1	55317	-0.236775	0.281046	-0.0859903	0.710595	0.205053	0.652575	0.291351	0.44115	0.179372	0.681916	0.1958	0.999548	-0.528125	0.00230961	-0.265362	0.163793	0.00925317	0.986824	ENSG00000125843
ENSG00000242802	AP5Z1	9907	0.685412	0.00333952	0.919988	4.76694e-05	0.312685	0.552209	0.706216	0.0466879	0.731334	0.0499754	0.381827	0.999548	-0.0208037	0.939037	0.188653	0.427575	-0.0691417	0.895748	ENSG00000242802
ENSG00000120868	APAF1	317	-0.683068	0.000139179	-0.464252	0.0108129	0.159409	0.746917	-0.429883	0.153545	-0.462316	0.135876	-0.138491	0.999548	-0.253185	0.126934	-0.00193571	0.992836	0.2979	0.213465	ENSG00000120868
ENSG00000107282	APBA1	320	3.07257	NA	1.65281	NA	0.490204	NA	2.2576	NA	1.71156	NA	0.451631	NA	0.814975	NA	-0.058748	NA	0.0385733	NA	ENSG00000107282
ENSG00000034053	APBA2	321	2.33389	NA	0.69101	NA	0.490178	NA	1.56339	NA	1.47106	NA	1.17289	NA	0.770499	NA	-0.780046	NA	-0.682709	NA	ENSG00000034053
ENSG00000011132	APBA3	9546	-0.556446	0.0175885	-0.282201	0.235535	-0.147883	0.823959	-0.376026	0.349804	-0.182766	0.719387	0.175024	0.999548	-0.180421	0.37945	-0.0994345	0.673594	-0.322908	0.271071	ENSG00000011132
ENSG00000166313	APBB1	322	-1.18282	0.149694	-0.41192	0.585714	-0.226515	0.929605	-0.354906	0.83402	-0.135906	NA	0.912827	0.999548	-0.827917	0.127583	-0.276014	0.665498	-1.13934	0.144727	ENSG00000166313
ENSG00000077420	APBB1IP	54518	0.483207	NA	-3.00196	NA	-2.23056	NA	1.11099	NA	-3.67629	NA	-3.54574	NA	-0.627787	NA	0.674327	NA	1.31518	NA	ENSG00000077420
ENSG00000163697	APBB2	323	-0.17718	0.500195	0.0538561	0.846639	-0.123957	0.860576	-0.770011	0.0170136	-0.705075	0.0382855	-0.217789	0.999548	0.592831	0.00101538	0.758931	2.66746e-05	0.0938321	0.842861	ENSG00000163697
ENSG00000113108	APBB3	10307	-0.993366	0.0227993	-0.922267	0.0187025	0.307207	0.744188	-0.61566	0.38408	-0.497527	0.499164	0.236523	0.999548	-0.377706	0.209624	-0.42474	0.174469	0.0706835	0.925637	ENSG00000113108
ENSG00000134982	APC	324	0.0465331	0.87972	0.234584	0.359532	-0.149831	0.835177	-0.244275	0.606164	0.046947	0.949128	-0.125656	0.999548	0.290808	0.157984	0.187637	0.419894	-0.0241746	0.969115	ENSG00000134982
ENSG00000115266	APC2	10297	1.15976	0.198833	1.42163	0.0880465	0.501467	0.848709	0.816828	0.64994	0.780544	NA	0.409965	0.999548	0.342934	0.710026	0.641081	0.475721	0.0915019	0.970806	ENSG00000115266
ENSG00000154856	APCDD1	147495	2.33389	NA	0.691034	NA	2.29193	NA	2.24025	NA	0.749795	NA	1.532	NA	0.0936403	NA	-0.0587614	NA	0.759928	NA	ENSG00000154856
ENSG00000198768	APCDD1L	164284	1.37214	NA	1.65286	NA	3.60709	NA	1.27853	NA	0.2133	NA	3.56849	NA	0.0936104	NA	1.43956	NA	0.0385987	NA	ENSG00000198768
ENSG00000132703	APCS	325	1.37213	NA	0.691056	NA	1.43993	NA	1.27851	NA	0.749824	NA	1.40135	NA	0.0936195	NA	-0.0587672	NA	0.0385839	NA	ENSG00000132703
ENSG00000164062	APEH	327	-0.278818	0.21457	-0.176113	0.456501	0.124612	0.850471	0.185413	0.672273	0.170712	0.727611	0.082667	0.999548	-0.464231	0.00834651	-0.346826	0.0676563	0.0419452	0.932261	ENSG00000164062
ENSG00000100823	APEX1	328	-0.488285	2.62493e-06	-0.310228	0.00431043	0.129584	0.62089	-0.0922032	0.694143	-0.193545	0.348821	-0.0890884	0.999548	-0.396081	1.17862e-05	-0.116683	0.279731	0.218673	0.1032	ENSG00000100823
ENSG00000169188	APEX2	27301	0.117217	0.473622	0.0669312	0.69903	0.000198979	0.999562	0.334202	0.141777	0.327524	0.184789	0.155074	0.999548	-0.216985	0.0818501	-0.260593	0.0406345	-0.154875	0.47425	ENSG00000169188
ENSG00000117362	APH1A	51107	0.131852	0.706359	0.296007	0.349575	0.22585	0.781625	0.0162618	0.984572	0.0711101	0.935533	0.098871	0.999548	0.11559	0.69028	0.224896	0.43746	0.126979	0.833949	ENSG00000117362
ENSG00000138613	APH1B	83464	-0.762444	0.142237	-0.354227	0.463818	-0.870708	0.28231	0.106011	0.933546	0.40567	NA	-0.179548	0.999548	-0.868454	0.0266931	-0.759897	0.0581969	-0.69116	0.239015	ENSG00000138613
ENSG00000166181	API5	8539	0.139337	0.412461	0.0861983	0.627686	-0.289678	0.296985	-0.407406	0.0790442	-0.184268	0.553317	-0.173695	0.999548	0.546743	8.66818e-06	0.270466	0.0465451	-0.115983	0.6642	ENSG00000166181
ENSG00000149089	APIP	51074	-0.230429	0.31044	-0.080065	0.751785	0.0373252	0.967442	-0.529644	0.0987201	-0.261669	0.528784	-0.156365	0.999548	0.299215	0.0978115	0.181604	0.376511	0.193691	0.554243	ENSG00000149089
ENSG00000169621	APLF	200558	-0.0796072	0.978	0.107495	NA	-0.349483	NA	-0.719836	NA	-0.685075	NA	1.64292	NA	0.640228	NA	0.79257	NA	-1.99241	NA	ENSG00000169621
ENSG00000171388	APLN	8862	-0.615501	0.65971	-0.532844	0.678997	0.481302	NA	-0.138179	NA	-0.0984701	NA	0.00329877	0.999548	-0.477322	0.725771	-0.434374	0.766375	0.478003	NA	ENSG00000171388
ENSG00000105290	APLP1	333	-2.09153	0.294191	-2.77261	NA	-0.637284	NA	-1.76461	NA	-1.38126	NA	-0.12266	0.999548	-0.326917	0.810319	-1.39135	0.302716	-0.514624	NA	ENSG00000105290
ENSG00000084234	APLP2	334	1.07925	2.34083e-07	0.602806	0.00675008	0.284322	0.57405	1.10612	0.000231456	0.586064	0.116907	0.200333	0.999548	-0.0268647	0.91483	0.0167413	0.952503	0.0839888	0.863124	ENSG00000084234
ENSG00000101474	APMAP	57136	1.02875	5.98492e-08	0.701078	0.000380371	0.260571	0.571547	0.748274	0.00959355	0.501024	0.146333	0.145577	0.999548	0.280477	0.116566	0.200054	0.312665	0.114994	0.770148	ENSG00000101474
ENSG00000118137	APOA1	335	-0.293704	NA	1.85773	NA	0.903441	NA	0.33407	NA	2.63785	NA	-1.32363	NA	-0.627774	NA	-0.780117	NA	2.22707	NA	ENSG00000118137
ENSG00000110244	APOA4	337	1.37216	NA	1.65284	NA	1.47549	NA	0.557241	NA	1.71162	NA	0.715614	NA	0.814915	NA	-0.0587816	NA	0.75988	NA	ENSG00000110244
ENSG00000110243	APOA5	116519	1.37208	NA	0.691001	NA	0.490169	NA	1.99971	NA	1.47102	NA	1.17285	NA	-0.62763	NA	-0.780017	NA	-0.682681	NA	ENSG00000110243
ENSG00000084674	APOB	338	0.359596	NA	-0.304074	NA	0.473835	NA	1.17416	NA	0.772671	NA	0.765544	NA	-0.814567	NA	-1.07675	NA	-0.291709	NA	ENSG00000084674
ENSG00000124701	APOBEC2	10930	1.37217	NA	0.691106	NA	0.490259	NA	1.27858	NA	0.0285857	NA	0.451728	NA	0.0935822	NA	0.66252	NA	0.0385318	NA	ENSG00000124701
ENSG00000128383	APOBEC3A	200315	-1.08528	NA	-0.191051	NA	-1.96722	NA	-2.365	NA	-0.13217	NA	-1.28433	NA	1.27972	NA	-0.0588818	NA	-0.682893	NA	ENSG00000128383
ENSG00000179750	APOBEC3B	9582	0.190327	0.401414	0.145559	0.525308	-0.455392	0.179765	0.546005	0.0788994	0.470092	0.17366	0.100226	0.999548	-0.355678	0.0422897	-0.324533	0.0781163	-0.555619	0.0119977	ENSG00000179750
ENSG00000244509	APOBEC3C	27350	-0.486784	0.055802	-0.734297	0.00247694	-0.416975	0.398807	0.0881178	0.887269	-0.0744826	0.919524	0.232459	0.999548	-0.574902	0.00736678	-0.659814	0.00259471	-0.649434	0.0211386	ENSG00000244509
ENSG00000128394	APOBEC3F	200316	-0.0889238	0.910053	-0.0205453	0.977956	-0.333144	0.8497	0.299785	0.819984	0.0688395	0.968172	0.223251	0.999548	-0.388708	0.434672	-0.0893848	0.882325	-0.556395	0.488967	ENSG00000128394
ENSG00000239713	APOBEC3G	60489	2.22201	0.30096	0.772451	NA	-0.128055	NA	3.14445	NA	0.238605	NA	0.183174	NA	-0.922435	NA	0.533846	NA	-0.311229	NA	ENSG00000239713
ENSG00000100298	APOBEC3H	164668	-2.75713	NA	-0.764594	NA	-0.547591	NA	0.180916	NA	2.32583	NA	2.44549	NA	-2.93805	NA	-3.09042	NA	-2.99308	NA	ENSG00000100298
ENSG00000173627	APOBEC4	403314	1.37208	NA	0.691001	NA	0.490169	NA	1.99971	NA	1.47102	NA	1.17285	NA	-0.62763	NA	-0.780017	NA	-0.682681	NA	ENSG00000173627
ENSG00000184730	APOBR	55911	-0.888634	0.564462	-1.25486	0.37281	-1.7165	NA	0.644494	NA	-0.280036	NA	0.188627	0.999548	-1.53313	0.172238	-0.974826	0.412662	-1.90513	NA	ENSG00000184730
ENSG00000130208	APOC1	341	-0.997804	0.0196682	-0.522776	0.17655	0.0411435	0.978289	-0.185572	0.849965	0.303213	0.728392	0.200289	0.999548	-0.812232	0.0139063	-0.825988	0.0138934	-0.159146	0.836575	ENSG00000130208
ENSG00000110245	APOC3	345	0.410454	NA	-0.270636	NA	-0.471483	NA	-0.387399	NA	-0.211802	NA	0.21134	NA	0.797854	NA	-0.058834	NA	-0.682823	NA	ENSG00000110245
ENSG00000189058	APOD	347	1.37216	NA	3.4299	NA	0.508874	NA	2.70685	NA	4.91696	NA	0.460517	NA	-1.33469	NA	-1.48705	NA	0.0483569	NA	ENSG00000189058
ENSG00000130203	APOE	348	0.169967	0.931009	-3.34847	NA	-0.747988	NA	-0.520129	NA	-3.75413	NA	-0.0890302	0.999548	0.690096	0.619371	0.405667	0.801264	-0.658958	NA	ENSG00000130203
ENSG00000091583	APOH	350	1.37217	NA	0.691106	NA	0.490259	NA	1.27858	NA	0.0285857	NA	0.451728	NA	0.0935822	NA	0.66252	NA	0.0385318	NA	ENSG00000091583
ENSG00000100342	APOL1	8542	2.02718	5.77175e-14	1.15847	4.70689e-05	0.315979	0.674661	1.44616	0.000280648	0.875003	0.0677542	0.436129	0.999548	0.581021	0.0214627	0.283466	0.333196	-0.12015	0.852256	ENSG00000100342
ENSG00000128335	APOL2	23780	-0.0274961	0.907695	-0.25337	0.182038	-0.192812	0.661898	-0.032484	0.94649	-0.311513	0.358367	0.0580395	0.999548	0.00498791	0.980308	0.0581438	0.77957	-0.250852	0.326734	ENSG00000128335
ENSG00000128284	APOL3	80833	1.50167	0.0123711	-0.186025	0.824501	0.55821	0.732383	0.455604	0.739889	-0.824964	NA	1.14495	0.999548	1.04607	0.0667207	0.638939	0.331182	-0.586743	0.65788	ENSG00000128284
ENSG00000100336	APOL4	80832	2.33391	NA	0.691056	NA	0.490224	NA	2.24027	NA	0.749823	NA	0.451655	NA	0.0936347	NA	-0.058767	NA	0.0385693	NA	ENSG00000100336
ENSG00000128313	APOL5	80831	2.33392	NA	0.691071	NA	0.490254	NA	2.24031	NA	0.749861	NA	-0.269617	NA	0.0936122	NA	-0.0587895	NA	0.759872	NA	ENSG00000128313
ENSG00000221963	APOL6	80830	1.46379	1.29812e-07	1.33651	2.06788e-06	0.270502	0.739919	0.689419	0.155705	0.529891	0.346574	0.256215	0.999548	0.774374	0.00242382	0.806618	0.00215117	0.0142869	0.986824	ENSG00000221963
ENSG00000178878	APOLD1	81575	-0.862166	0.305817	-1.11763	0.152362	-0.876752	0.595965	-1.07565	0.44753	-1.19991	NA	-0.992118	0.999548	0.213486	0.788888	0.0822847	0.927672	0.115366	0.952263	ENSG00000178878
ENSG00000204444	APOM	55937	-1.38847	0.00071141	-0.610848	0.11344	-0.261998	0.804774	-0.329548	0.730629	-0.328005	0.717957	0.0680492	0.999548	-1.05892	0.00617497	-0.282843	0.515934	-0.330047	0.653896	ENSG00000204444
ENSG00000184831	APOO	79135	-0.228734	0.186541	-0.106777	0.559746	0.0558617	0.93058	0.137738	0.68857	0.241409	0.439287	0.122247	0.999548	-0.366473	0.00767707	-0.348186	0.0144805	-0.0663849	0.848783	ENSG00000184831
ENSG00000155008	APOOL	139322	-0.216029	0.284068	0.0311872	0.895158	-0.280953	0.457974	-0.171795	0.658815	0.108244	0.811668	-0.0107401	0.999548	-0.0442344	0.83026	-0.0770569	0.719043	-0.270213	0.30457	ENSG00000155008
ENSG00000142192	APP	351	1.57641	1.84483e-14	1.29564	8.03155e-10	0.513568	0.182507	1.0046	0.00116164	0.858261	0.0123852	0.2115	0.999548	0.571813	0.00233168	0.437378	0.0293537	0.302068	0.336039	ENSG00000142192
ENSG00000062725	APPBP2	10513	-0.160783	0.471394	-0.027123	0.914354	-0.0457501	0.955998	-0.270108	0.474059	-0.317557	0.398319	-0.224588	0.999548	0.109324	0.592642	0.290434	0.123059	0.178838	0.595973	ENSG00000062725
ENSG00000157500	APPL1	26060	-0.167195	0.366147	-0.23662	0.174463	-0.173305	0.672883	-0.154535	0.654837	-0.126635	0.751063	0.0101694	0.999548	-0.0126598	0.949673	-0.109985	0.529919	-0.183475	0.473529	ENSG00000157500
ENSG00000136044	APPL2	55198	-0.254435	0.157578	-0.324285	0.0552577	-0.0876897	0.868118	0.0549539	0.897647	0.110484	0.785346	0.0113101	0.999548	-0.309389	0.0314179	-0.434769	0.00247773	-0.0989998	0.755957	ENSG00000136044
ENSG00000198931	APRT	353	0.0570351	0.811206	0.346207	0.069985	0.377757	0.254096	0.342104	0.282427	0.343534	0.314031	0.343172	0.999548	-0.285069	0.0790466	0.00267304	0.990061	0.0345859	0.937832	ENSG00000198931
ENSG00000137074	APTX	54840	0.230648	0.194814	0.117844	0.534224	-0.786122	3.09016e-05	0.154145	0.655877	0.27299	0.388991	-0.157377	0.999548	0.076503	0.651439	-0.155146	0.35093	-0.628745	0.000159176	ENSG00000137074
ENSG00000240583	AQP1	358	-1.74628	NA	-1.46557	NA	-0.385947	NA	-1.1222	NA	0.0322284	NA	-0.49103	NA	-0.624081	NA	-1.4978	NA	0.105083	NA	ENSG00000240583
ENSG00000143595	AQP10	89872	1.37216	NA	1.65285	NA	0.490239	NA	0.55724	NA	1.71162	NA	0.451692	NA	0.814922	NA	-0.0587745	NA	0.0385468	NA	ENSG00000143595
ENSG00000178301	AQP11	282679	-0.593393	0.4432	-1.06252	0.124369	0.0805012	0.97496	0.379717	0.78306	-0.383549	NA	-0.0332191	0.999548	-0.973109	0.0249672	-0.678974	0.135862	0.11372	0.914263	ENSG00000178301
ENSG00000184945	AQP12A	375318	3.70721	NA	0.691028	NA	0.490196	NA	3.61354	NA	0.749773	NA	0.451605	NA	0.0936776	NA	-0.0587456	NA	0.0385907	NA	ENSG00000184945
ENSG00000185176	AQP12B	653437	0.410455	NA	-0.27062	NA	-0.471452	NA	0.316926	NA	-0.211763	NA	-0.509932	NA	0.0935296	NA	-0.058857	NA	0.0384792	NA	ENSG00000185176
ENSG00000167580	AQP2	359	1.37206	NA	1.65276	NA	0.490149	NA	1.99967	NA	2.43274	NA	1.17281	NA	-0.627615	NA	-0.779987	NA	-0.682666	NA	ENSG00000167580
ENSG00000165272	AQP3	360	-0.809817	0.00792638	-0.708394	0.0226342	-0.484246	0.445381	0.0289588	0.973371	-0.267587	0.7063	0.0463209	0.999548	-0.838776	0.00105595	-0.440807	0.125007	-0.530567	0.175344	ENSG00000165272
ENSG00000171885	AQP4	361	1.37217	NA	0.691091	NA	0.490274	NA	1.27858	NA	0.749896	NA	-0.269582	NA	0.0935822	NA	-0.0588045	NA	0.759857	NA	ENSG00000171885
ENSG00000161798	AQP5	362	1.37222	0.580844	1.58378	0.482486	-0.471498	NA	2.49562	NA	2.35148	NA	0.147652	0.999548	-1.1234	0.174944	-0.767698	0.385199	-0.61915	NA	ENSG00000161798
ENSG00000086159	AQP6	363	-1.24789	NA	-1.92897	NA	-2.12979	NA	0.669569	NA	0.140873	NA	-1.6514	NA	-1.91746	NA	-2.06984	NA	-0.478389	NA	ENSG00000086159
ENSG00000165269	AQP7	364	-0.900195	NA	0.398767	NA	-1.77439	NA	1.85225	NA	3.30359	NA	-1.47545	NA	-2.75245	NA	-2.90483	NA	-0.298945	NA	ENSG00000165269
ENSG00000103375	AQP8	343	1.3722	NA	0.691106	NA	0.490289	NA	0.557312	NA	0.749933	NA	-0.269545	NA	0.814885	NA	-0.058827	NA	0.759834	NA	ENSG00000103375
ENSG00000103569	AQP9	366	2.33391	NA	0.691056	NA	0.490224	NA	2.24027	NA	0.749823	NA	0.451655	NA	0.0936347	NA	-0.058767	NA	0.0385693	NA	ENSG00000103569
ENSG00000021776	AQR	9716	0.419867	0.00324814	0.491713	0.000487933	0.0382311	0.952436	0.0550229	0.878269	0.0814217	0.821493	-0.0384337	0.999548	0.364844	0.00286862	0.410291	0.00103233	0.0766648	0.796225	ENSG00000021776
ENSG00000169083	AR	367	-0.13388	0.63342	0.121226	0.662997	0.321202	0.517371	0.0320576	0.960452	0.121881	0.837815	0.284085	0.999548	-0.165938	0.479675	-0.00065486	0.998045	0.0371172	0.951521	ENSG00000169083
ENSG00000078061	ARAF	369	-0.340157	0.0306084	-0.334071	0.031584	0.0582849	0.924021	-0.210104	0.468494	-0.317424	0.239852	0.0147728	0.999548	-0.130053	0.354868	-0.0166471	0.926295	0.0435122	0.897182	ENSG00000078061
ENSG00000186635	ARAP1	116985	-0.1525	0.546005	-0.406311	0.0670533	0.0482727	0.959622	0.227851	0.604461	0.0337351	0.962634	0.177489	0.999548	-0.38035	0.0395766	-0.440046	0.0200668	-0.129217	0.753969	ENSG00000186635
ENSG00000047365	ARAP2	116984	-0.685737	0.0034518	-0.225561	0.382751	-0.433732	0.322002	-0.502036	0.197247	-0.0724441	0.91555	-0.389344	0.999548	-0.183702	0.406109	-0.153117	0.526901	-0.044388	0.936158	ENSG00000047365
ENSG00000120318	ARAP3	64411	-0.342784	0.212584	-0.231666	0.416148	-0.0156248	0.987951	-0.0625619	0.925163	-0.140284	0.822638	0.100571	0.999548	-0.280222	0.221663	-0.0913824	0.749311	-0.116196	0.827685	ENSG00000120318
ENSG00000198576	ARC	23237	1.99951	NA	-1.76527	NA	-0.196794	NA	1.91624	NA	-0.267434	NA	-0.191335	NA	0.0832771	NA	-1.49784	NA	-0.00545925	NA	ENSG00000198576
ENSG00000095139	ARCN1	372	-0.0788927	0.603412	-0.0309911	0.847968	-0.204115	0.431528	-0.102827	0.709019	-0.125445	0.655926	-0.107373	0.999548	0.0239345	0.86677	0.0944541	0.478814	-0.0967423	0.673085	ENSG00000095139
ENSG00000109321	AREG	374	0.748501	0.249051	0.169478	0.821497	-0.00355915	0.99873	0.523232	0.673656	-0.159233	0.928221	0.463014	0.999548	0.225269	0.706925	0.328711	0.591736	-0.466573	0.657744	ENSG00000109321
ENSG00000119682	AREL1	9870	-0.657278	0.000120753	-0.461916	0.00407469	-0.197623	0.578948	-0.438149	0.0836308	-0.338172	0.211326	-0.288226	0.999548	-0.219129	0.0775828	-0.123744	0.380414	0.0906029	0.731076	ENSG00000119682
ENSG00000143761	ARF1	375	0.0234349	0.879943	0.131853	0.304475	-0.101781	0.754339	0.218699	0.277442	0.14717	0.54116	0.0901548	0.999548	-0.195264	0.0564853	-0.0153175	0.913426	-0.191936	0.209232	ENSG00000143761
ENSG00000134287	ARF3	377	1.37223	NA	0.691147	NA	0.490309	NA	-0.0841312	NA	-0.25153	NA	-0.179571	NA	1.45636	NA	0.942677	NA	0.66988	NA	ENSG00000134287
ENSG00000168374	ARF4	378	0.153916	0.417732	0.0342593	0.873874	-0.177506	0.675234	-0.209935	0.523191	-0.44193	0.116518	-0.209936	0.999548	0.363852	0.0110307	0.47619	0.000959564	0.0324306	0.936158	ENSG00000168374
ENSG00000004059	ARF5	381	-0.498024	0.0255676	-0.240339	0.323633	0.0863843	0.920812	-0.100425	0.849408	-0.0130099	0.98456	0.137007	0.999548	-0.397599	0.037672	-0.227329	0.295051	-0.0506226	0.919604	ENSG00000004059
ENSG00000165527	ARF6	382	0.0813416	0.667251	0.29905	0.0626201	0.183725	0.621433	-1.20049	1.98077e-09	-0.784793	0.000458329	-0.103383	0.999548	1.28183	1.01575e-25	1.08384	3.34222e-18	0.287107	0.14765	ENSG00000165527
ENSG00000101199	ARFGAP1	55738	0.107454	0.388626	0.0860483	0.488908	-0.00439836	0.992667	0.100085	0.662069	0.0331309	0.917536	0.0527236	0.999548	0.00736926	0.954593	0.0529174	0.654064	-0.0571219	0.793733	ENSG00000101199
ENSG00000149182	ARFGAP2	84364	-0.0400498	0.832917	-0.210041	0.172305	-0.0874276	0.84702	0.467085	0.0290024	0.330993	0.190208	0.161047	0.999548	-0.507135	1.97915e-05	-0.541034	7.81998e-06	-0.248475	0.177965	ENSG00000149182
ENSG00000242247	ARFGAP3	26286	-0.340784	0.117896	-0.216565	0.340773	-0.146	0.810642	-0.203119	0.643817	-0.173248	0.723641	-0.0452802	0.999548	-0.137666	0.514014	-0.043317	0.865027	-0.10072	0.823441	ENSG00000242247
ENSG00000066777	ARFGEF1	10565	0.0517901	0.825024	0.0688661	0.757648	-0.017014	0.983364	-0.406819	0.164283	-0.231948	0.527121	-0.146613	0.999548	0.458609	0.00227566	0.300814	0.0663658	0.129599	0.691459	ENSG00000066777
ENSG00000124198	ARFGEF2	10564	-0.399437	0.0284974	-0.157643	0.437096	-0.0649533	0.929681	-0.475882	0.0875554	-0.220932	0.550853	-0.10706	0.999548	0.0764449	0.676644	0.0632883	0.756886	0.0421062	0.917396	ENSG00000124198
ENSG00000112379	ARFGEF3	57221	-0.0819654	0.793859	-0.313449	0.233867	0.187033	0.785347	-0.0809247	0.896218	0.144958	0.809905	0.377341	0.999548	-0.00104069	0.997137	-0.458407	0.0400117	-0.190308	0.66255	ENSG00000112379
ENSG00000164144	ARFIP1	27236	-0.0791731	0.713806	-0.0286585	0.899696	-0.053831	0.939291	-0.328886	0.292297	-0.371119	0.245662	-0.110091	0.999548	0.249713	0.134777	0.342461	0.0396535	0.0562595	0.894292	ENSG00000164144
ENSG00000132254	ARFIP2	23647	-0.0833575	0.600359	0.0641248	0.687497	0.137916	0.676881	-0.782104	7.33786e-06	-0.54999	0.00497647	-0.0329593	0.999548	0.698747	2.43968e-11	0.614115	1.01503e-08	0.170875	0.360287	ENSG00000132254
ENSG00000101246	ARFRP1	10139	0.257106	0.388661	0.419733	0.128252	0.304026	0.631742	0.282502	0.60197	0.280525	0.61842	0.425637	0.999548	-0.0253955	0.933585	0.139208	0.62553	-0.121612	0.828852	ENSG00000101246
ENSG00000118520	ARG1	383	2.33391	NA	0.691056	NA	0.490224	NA	2.24027	NA	0.749823	NA	0.451655	NA	0.0936347	NA	-0.058767	NA	0.0385693	NA	ENSG00000118520
ENSG00000081181	ARG2	384	-0.655877	0.0237858	-0.479636	0.102641	-0.0209488	0.985069	0.217886	0.735237	0.06431	0.943277	0.381104	0.999548	-0.873764	0.000486934	-0.543946	0.0408625	-0.402053	0.329347	ENSG00000081181
ENSG00000186103	ARGFX	503582	1.37213	NA	0.691056	NA	1.43993	NA	1.27851	NA	0.749824	NA	1.40135	NA	0.0936195	NA	-0.0587672	NA	0.0385839	NA	ENSG00000186103
ENSG00000134884	ARGLU1	55082	0.253321	0.165548	0.360842	0.0362861	0.204152	0.608675	0.056505	0.895093	0.236231	0.483141	0.0905685	0.999548	0.196816	0.19349	0.124611	0.468868	0.113584	0.712313	ENSG00000134884
ENSG00000175220	ARHGAP1	392	-0.362794	0.0310975	-0.388017	0.0200054	-0.105418	0.839033	0.208432	0.525038	0.220066	0.51781	0.231285	0.999548	-0.571226	3.93397e-05	-0.608083	1.70851e-05	-0.336703	0.100445	ENSG00000175220
ENSG00000071205	ARHGAP10	79658	-0.0780808	0.739412	0.328819	0.0660331	-0.0373235	0.962355	-0.545546	0.0426356	-0.228841	0.506351	-0.288638	0.999548	0.467465	0.000698933	0.557661	5.80264e-05	0.251314	0.262439	ENSG00000071205
ENSG00000198826	ARHGAP11A	9824	-0.327914	0.114346	-0.331124	0.107003	-0.343478	0.379686	-0.88272	0.00107289	-0.616048	0.0477666	-0.698598	0.291863	0.554806	0.000617867	0.284925	0.117744	0.35512	0.147997	ENSG00000198826
ENSG00000165322	ARHGAP12	94134	-0.184362	0.607139	0.194566	0.573435	0.0350275	0.978469	-0.893182	0.0479558	-0.334641	0.59448	-0.41142	0.999548	0.70882	0.00493068	0.529206	0.0509181	0.446447	0.270959	ENSG00000165322
ENSG00000075884	ARHGAP15	55843	0.84417	0.710337	0.14943	NA	0.35679	NA	-1.4702	NA	0.227891	NA	1.6368	NA	2.31437	NA	-0.0784613	NA	-1.28001	NA	ENSG00000075884
ENSG00000140750	ARHGAP17	55114	-0.777976	1.44292e-07	-0.0984034	0.593872	-0.222914	0.5067	-0.52555	0.0225946	-0.0828416	0.832788	0.0340521	0.999548	-0.252426	0.0654817	-0.0155617	0.935515	-0.256966	0.206797	ENSG00000140750
ENSG00000146376	ARHGAP18	93663	0.00299226	0.99412	0.0824414	0.787427	0.143913	0.85292	-0.77691	0.0316508	-0.531969	0.21754	-0.180481	0.999548	0.779902	0.000107436	0.61441	0.00379921	0.324393	0.345035	ENSG00000146376
ENSG00000213390	ARHGAP19	84986	0.410435	NA	-0.270646	NA	-0.471482	NA	0.353904	NA	-0.266401	NA	-0.509398	NA	0.0565315	NA	-0.00424479	NA	0.0379165	NA	ENSG00000213390
ENSG00000137727	ARHGAP20	57569	1.37226	NA	-0.27063	NA	1.62931	NA	-1.46872	NA	-0.211792	NA	-0.450303	NA	2.84098	NA	-0.0588374	NA	2.07961	NA	ENSG00000137727
ENSG00000107863	ARHGAP21	57584	-0.20421	0.370216	0.017556	0.945858	-0.425809	0.198831	-0.393885	0.207921	-0.0274221	0.963933	-0.388415	0.999548	0.189675	0.216424	0.0449781	0.819528	-0.0373937	0.923961	ENSG00000107863
ENSG00000128805	ARHGAP22	58504	0.12953	0.793616	0.465457	0.195969	0.366673	0.65601	-0.485042	0.437758	0.0477268	0.962634	-0.287584	0.999548	0.614572	0.00396372	0.417731	0.072654	0.654257	0.0192623	ENSG00000128805
ENSG00000275832	ARHGAP23	57636	0.477729	0.00895412	0.5363	0.00239307	0.250664	0.51966	0.63638	0.0124366	0.668747	0.011757	0.541587	0.58218	-0.158651	0.307289	-0.132447	0.438508	-0.290923	0.172049	ENSG00000275832
ENSG00000138639	ARHGAP24	83478	-1.64395	0.0149413	-0.165534	0.783965	-0.164019	0.932086	-0.639067	0.632055	-0.162995	NA	0.566046	0.999548	-1.00488	0.0530251	-0.00253815	0.996319	-0.730064	0.365812	ENSG00000138639
ENSG00000163219	ARHGAP25	9938	-2.05269	0.002255	-1.87065	0.00133542	-0.0245699	0.991116	-1.49881	0.131069	-1.07565	0.300692	-0.548912	0.999548	-0.553875	0.247338	-0.795005	0.102398	0.524342	0.488787	ENSG00000163219
ENSG00000145819	ARHGAP26	23092	0.139472	0.719366	0.0599927	0.879895	0.225925	0.803301	-0.503991	0.371985	-0.563359	0.330304	-0.415865	0.999548	0.643463	0.0162752	0.623352	0.0252535	0.64179	0.0895848	ENSG00000145819
ENSG00000159314	ARHGAP27	201176	-0.267807	0.333883	-0.0570669	0.851525	0.0477269	0.96259	0.0449237	0.944937	-0.0414993	0.957386	0.0640521	0.999548	-0.312731	0.135878	-0.0155676	0.957899	-0.0163252	0.980144	ENSG00000159314
ENSG00000088756	ARHGAP28	79822	-2.45011	0.000913984	-0.536471	0.326497	-1.07048	0.240639	-0.935565	0.481145	-0.487926	NA	-0.475877	0.999548	-1.51454	0.00230816	-0.0485449	0.937081	-0.594599	0.453056	ENSG00000088756
ENSG00000137962	ARHGAP29	9411	-0.879009	0.00114751	-0.345206	0.249284	-0.352856	0.571277	-1.54131	2.70543e-05	-0.53612	0.28535	-0.449876	0.999548	0.6623	0.00412556	0.190914	0.505954	0.0970202	0.872502	ENSG00000137962
ENSG00000031081	ARHGAP31	57514	0.373142	0.493447	-0.44921	0.404788	0.261778	0.852171	-0.457225	0.621711	-0.391607	0.713375	0.0467417	0.999548	0.830366	0.0197059	-0.0576033	0.911836	0.215037	0.806924	ENSG00000031081
ENSG00000134909	ARHGAP32	9743	-0.882315	2.81162e-05	-0.525524	0.00794539	-0.244144	0.573288	-0.830663	0.00418396	-0.291582	0.443744	-0.13557	0.999548	-0.0516522	0.793253	-0.233942	0.186892	-0.108574	0.763371	ENSG00000134909
ENSG00000004777	ARHGAP33	115703	-0.643979	0.588264	-0.0826861	0.940026	0.234404	0.940872	0.851448	0.62941	0.667886	NA	0.835178	0.999548	-1.49543	0.00288988	-0.750572	0.161986	-0.600774	0.489277	ENSG00000004777
ENSG00000160007	ARHGAP35	2909	-0.722249	3.36228e-06	-0.142866	0.434944	-0.284964	0.373939	-0.720011	0.0013407	-0.17376	0.615091	-0.400121	0.999548	-0.00223859	0.990125	0.0308935	0.871969	0.115157	0.69342	ENSG00000160007
ENSG00000147256	ARHGAP36	158763	1.37213	NA	0.691056	NA	1.47546	NA	1.27851	NA	0.749822	NA	1.43688	NA	0.09362	NA	-0.0587666	NA	0.038585	NA	ENSG00000147256
ENSG00000147799	ARHGAP39	80728	-0.0715577	0.828408	-0.153945	0.59381	0.34146	0.504281	-0.579634	0.133851	-0.150421	0.797019	-0.183399	0.999548	0.508077	0.00833696	-0.00352437	0.989317	0.524858	0.0453374	ENSG00000147799
ENSG00000089820	ARHGAP4	393	-0.809706	0.719542	-0.0191434	NA	-0.857788	NA	-0.427035	NA	-0.162705	NA	-0.231806	0.999548	-0.382671	0.764424	0.143562	0.917801	-0.625982	NA	ENSG00000089820
ENSG00000124143	ARHGAP40	343578	1.37212	NA	2.7923	NA	0.490216	NA	1.27851	NA	2.12971	NA	0.451651	NA	0.0936149	NA	0.662586	NA	0.0385646	NA	ENSG00000124143
ENSG00000165895	ARHGAP42	143872	-0.752329	0.00727269	-0.518241	0.062834	-0.620247	0.168813	-0.648243	0.143823	-0.478404	0.339857	-0.487513	0.999548	-0.104086	0.705603	-0.0398365	0.901136	-0.132735	0.808904	ENSG00000165895
ENSG00000006740	ARHGAP44	9912	-0.947038	0.403757	-0.187197	0.856084	-1.38854	0.483944	-0.27684	0.903163	-0.304868	NA	-1.15024	0.999548	-0.670199	0.311995	0.117671	0.883185	-0.238305	0.875312	ENSG00000006740
ENSG00000180448	ARHGAP45	23526	0.0147444	0.964916	-0.0225933	0.939489	0.161093	0.802574	-0.316719	0.440045	-0.144746	0.785272	-0.0306833	0.999548	0.331464	0.0727176	0.122153	0.587083	0.191776	0.5776	ENSG00000180448
ENSG00000100852	ARHGAP5	394	-0.537995	0.0302932	-0.0674847	0.824912	-0.477422	0.28259	-1.36408	2.32858e-05	-0.666689	0.0930659	-0.744877	0.586485	0.826088	2.69832e-05	0.599205	0.00407667	0.267455	0.46534	ENSG00000100852
ENSG00000047648	ARHGAP6	395	2.83354	0.00181183	1.70918	0.0788338	1.15437	0.596393	2.61254	0.127387	1.272	0.566637	0.870253	0.999548	0.221001	0.872528	0.437183	0.751356	0.284121	0.919293	ENSG00000047648
ENSG00000241484	ARHGAP8	23779	-0.293515	NA	-0.974621	NA	-1.17544	NA	-1.82811	NA	-0.915641	NA	-1.93512	NA	1.53459	NA	-0.0589795	NA	0.759682	NA	ENSG00000241484
ENSG00000123329	ARHGAP9	64333	0.463869	NA	-1.179	NA	-0.40278	NA	2.15898	NA	-0.550778	NA	-0.364055	NA	-1.69511	NA	-0.628224	NA	-0.0387244	NA	ENSG00000123329
ENSG00000141522	ARHGDIA	396	-0.119676	0.542062	-0.0904072	0.65325	0.0928681	0.86436	0.135844	0.704671	0.100093	0.807184	0.0768639	0.999548	-0.255521	0.0828804	-0.1905	0.23983	0.0160042	0.972898	ENSG00000141522
ENSG00000111348	ARHGDIB	397	-1.27463	2.5039e-09	-1.05665	3.79504e-07	-0.248848	0.630254	0.0231799	0.972417	-0.145687	0.790971	0.21021	0.999548	-1.29781	5.32866e-12	-0.910958	1.5892e-06	-0.459058	0.0920759	ENSG00000111348
ENSG00000242173	ARHGDIG	398	-2.11402	NA	-2.79511	NA	-1.02478	NA	-0.195916	NA	-0.724616	NA	0.227017	NA	-1.91811	NA	-2.07049	NA	-1.2518	NA	ENSG00000242173
ENSG00000076928	ARHGEF1	9138	-0.05665	0.793363	-0.133032	0.489995	0.158563	0.722592	-0.11704	0.752448	0.0832313	0.84681	0.31372	0.999548	0.0603904	0.727765	-0.216263	0.174469	-0.155157	0.567135	ENSG00000076928
ENSG00000104728	ARHGEF10	9639	0.520147	0.000277931	0.494951	0.000521296	0.195959	0.549594	0.130696	0.677401	0.188161	0.534673	-0.0440753	0.999548	0.389451	0.00172916	0.30679	0.0199783	0.240034	0.219444	ENSG00000104728
ENSG00000074964	ARHGEF10L	55160	-0.790325	0.00442654	-0.798014	0.00197824	-0.403503	0.431528	-0.564626	0.185673	-0.409619	0.389515	-0.297048	0.999548	-0.225699	0.280323	-0.388395	0.0582584	-0.106455	0.821373	ENSG00000074964
ENSG00000132694	ARHGEF11	9826	-0.137471	0.452379	-0.106528	0.551614	-0.0409096	0.950689	-0.171111	0.583039	-0.0331315	0.944163	0.0570877	0.999548	0.0336399	0.83095	-0.0733967	0.643703	-0.0979973	0.717741	ENSG00000132694
ENSG00000196914	ARHGEF12	23365	-0.608338	0.000277568	-0.165941	0.380049	-0.508941	0.0381837	-0.922168	4.98975e-05	-0.535925	0.0429889	-0.708077	0.073369	0.313831	0.0279952	0.369984	0.0109533	0.199136	0.414538	ENSG00000196914
ENSG00000198844	ARHGEF15	22899	-0.664648	NA	-1.34572	NA	-0.561277	NA	-0.758087	NA	-1.28678	NA	-1.32101	NA	0.0934386	NA	-0.0589481	NA	0.759729	NA	ENSG00000198844
ENSG00000130762	ARHGEF16	27237	-0.391122	0.06667	-0.679018	0.000581346	-0.158042	0.778691	-0.0859963	0.861101	0.113971	0.819186	0.337528	0.999548	-0.305126	0.0788909	-0.792989	1.76255e-06	-0.495571	0.0264765	ENSG00000130762
ENSG00000110237	ARHGEF17	9828	0.292183	0.235562	0.657215	0.00159914	0.363746	0.397259	0.247316	0.555959	0.427273	0.235402	0.13793	0.999548	0.044867	0.824265	0.229941	0.200705	0.225816	0.412493	ENSG00000110237
ENSG00000104880	ARHGEF18	23370	-0.136657	0.511593	-0.198145	0.300901	-0.401967	0.168813	-0.460261	0.0893463	-0.381942	0.205763	-0.183638	0.999548	0.323603	0.0251673	0.183797	0.261625	-0.218328	0.365737	ENSG00000104880
ENSG00000142632	ARHGEF19	128272	1.02955	1.16816e-08	1.24261	1.14825e-12	0.306038	0.443091	0.267823	0.452849	0.292337	0.42021	0.00930005	0.999548	0.761727	3.14703e-07	0.95027	1.55711e-10	0.296738	0.2223	ENSG00000142632
ENSG00000116584	ARHGEF2	9181	-0.00606028	0.983477	-0.220713	0.32098	-0.248193	0.593698	0.207355	0.617212	0.0557086	0.926349	0.049731	0.999548	-0.213416	0.246488	-0.276422	0.144059	-0.297924	0.271296	ENSG00000116584
ENSG00000240771	ARHGEF25	115557	3.3112	0.229991	1.87284	NA	0.640538	NA	6.26877	NA	4.26145	NA	2.93181	NA	-2.95757	NA	-2.38861	NA	-2.29127	NA	ENSG00000240771
ENSG00000114790	ARHGEF26	26084	-0.584322	0.0389308	-0.694036	0.00893999	0.03049	0.978289	-0.148729	0.819638	0.0979128	0.901259	0.252976	0.999548	-0.435593	0.0728623	-0.791949	0.000997599	-0.222486	0.631745	ENSG00000114790
ENSG00000214944	ARHGEF28	64283	0.225349	0.22268	-0.234175	0.195776	-0.0790524	0.888077	-0.210091	0.52197	-0.0982897	0.811311	-0.161555	0.999548	0.435439	0.00142522	-0.135885	0.421029	0.082503	0.808904	ENSG00000214944
ENSG00000163947	ARHGEF3	50650	-0.828184	4.06948e-05	-0.665655	0.000949372	-0.178932	0.751651	-0.223526	0.608895	-0.13282	0.795239	-0.0367765	0.999548	-0.604658	0.000628935	-0.532834	0.00370041	-0.142155	0.713954	ENSG00000163947
ENSG00000214694	ARHGEF33	100271715	-0.392802	0.55582	-0.472483	0.454688	-0.14044	0.954322	0.212406	0.878269	-0.272998	0.848187	-0.237892	0.999548	-0.605208	0.237515	-0.199485	0.751557	0.0974518	0.941647	ENSG00000214694
ENSG00000213214	ARHGEF35	445328	-1.74454	0.294747	-2.30446	0.147668	-1.06114	0.737725	-1.63337	NA	-1.56135	NA	-0.16844	0.999548	-0.111172	0.915944	-0.743108	0.451594	-0.892696	0.575111	ENSG00000213214
ENSG00000183111	ARHGEF37	389337	1.28024	0.363504	-2.56305	0.181128	0.227564	NA	1.82056	NA	-1.66643	NA	1.55884	0.999548	-0.540321	0.660793	-0.89662	0.47766	-1.33128	NA	ENSG00000183111
ENSG00000236699	ARHGEF38	54848	2.21918	NA	0.691129	NA	-0.471495	NA	2.1256	NA	0.0286249	NA	-0.509995	NA	0.0935786	NA	0.662504	NA	0.0385	NA	ENSG00000236699
ENSG00000137135	ARHGEF39	84904	-0.672631	0.000284685	-0.549985	0.0020238	0.179583	0.686295	0.197721	0.624536	-0.00378736	0.994561	0.251349	0.999548	-0.870351	6.43928e-08	-0.546198	0.000874267	-0.0717664	0.860311	ENSG00000137135
ENSG00000136002	ARHGEF4	50649	0.0365768	0.886666	-0.0134578	0.958396	-0.212553	0.644324	0.525084	0.0614776	0.37576	0.246499	0.168087	0.999548	-0.488507	0.000682746	-0.389218	0.0102241	-0.380641	0.0590184	ENSG00000136002
ENSG00000165801	ARHGEF40	55701	-0.725414	0.00919116	-0.881354	0.00116439	-0.275433	0.699833	-0.351596	0.516814	-0.193498	0.773432	0.198854	0.999548	-0.373818	0.126045	-0.687856	0.00387739	-0.474287	0.174262	ENSG00000165801
ENSG00000050327	ARHGEF5	7984	0.404849	0.274432	-0.971874	0.00823072	-0.102055	0.939291	0.493792	0.389046	-0.432629	0.532063	0.174552	0.999548	-0.0889429	0.768992	-0.539245	0.0399765	-0.276608	0.548257	ENSG00000050327
ENSG00000129675	ARHGEF6	9459	0.410415	NA	0.691116	NA	0.478213	NA	0.316856	NA	0.749929	NA	0.439689	NA	0.0935594	NA	-0.0588122	NA	0.0385239	NA	ENSG00000129675
ENSG00000102606	ARHGEF7	8874	0.202973	0.0551324	0.0471492	0.700756	0.043908	0.8997	-0.188952	0.283392	-0.346731	0.0262563	-0.188392	0.999548	0.391925	1.91169e-06	0.39388	2.42268e-06	0.2323	0.0475356	ENSG00000102606
ENSG00000131089	ARHGEF9	23229	0.410435	NA	-0.27064	NA	0.478233	NA	0.316891	NA	-0.211798	NA	0.439724	NA	0.0935444	NA	-0.0588422	NA	0.0385089	NA	ENSG00000131089
ENSG00000117713	ARID1A	8289	0.334505	0.00517417	0.274496	0.0237272	0.285713	0.145424	-0.143389	0.546117	-0.0627028	0.834883	0.0520556	0.999548	0.477895	6.61019e-07	0.337198	0.00087166	0.233658	0.107499	ENSG00000117713
ENSG00000049618	ARID1B	57492	0.562932	6.53131e-06	0.857856	8.41071e-13	0.293571	0.187141	0.303105	0.14916	0.617136	0.000947085	0.299642	0.999548	0.259827	0.0179596	0.24072	0.03625	-0.00607141	0.986824	ENSG00000049618
ENSG00000189079	ARID2	196528	0.260776	0.047182	0.113183	0.432545	0.00015963	0.999562	-0.20315	0.38455	-0.0713758	0.824423	-0.0448768	0.999548	0.463926	1.55287e-05	0.184559	0.135182	0.0450364	0.878168	ENSG00000189079
ENSG00000116017	ARID3A	1820	0.299444	0.299016	0.411623	0.115739	-0.0367657	0.97496	0.316361	0.530318	0.0962744	0.889604	0.292089	0.999548	-0.016917	0.954906	0.315349	0.179271	-0.328855	0.363147	ENSG00000116017
ENSG00000179361	ARID3B	10620	0.763605	0.209298	-1.13135	0.0990381	-1.01962	0.425553	0.0337021	0.983456	-1.6616	NA	-1.42674	0.999548	0.729903	0.131808	0.530243	0.324961	0.407119	0.67869	ENSG00000179361
ENSG00000205143	ARID3C	138715	2.40519	0.300946	2.79317	NA	0.506977	NA	0.775475	NA	2.59533	NA	0.275729	0.999548	1.62972	0.328026	0.19784	0.93104	0.231249	NA	ENSG00000205143
ENSG00000032219	ARID4A	5926	0.212375	0.497054	0.163814	0.604713	-0.0593257	0.961425	-0.393556	0.428997	-0.209667	0.744651	-0.0370156	0.999548	0.605931	0.00757857	0.373481	0.139337	-0.0223101	0.977256	ENSG00000032219
ENSG00000054267	ARID4B	51742	0.488447	0.02391	0.410371	0.0633768	-0.0158297	0.985612	-0.178489	0.695914	0.0574134	0.930293	-0.0709872	0.999548	0.666936	0.000175644	0.352958	0.0738133	0.0551575	0.911476	ENSG00000054267
ENSG00000196843	ARID5A	10865	0.395148	0.281614	0.686885	0.028835	0.163683	0.8768	-0.531474	0.341412	-0.188373	0.799513	-0.0579037	0.999548	0.926622	0.000115862	0.875258	0.00040459	0.221586	0.67869	ENSG00000196843
ENSG00000150347	ARID5B	84159	-0.300375	0.274483	-0.0114103	0.973385	-0.166391	0.827342	0.630406	0.119527	0.622758	0.148791	0.392031	0.999548	-0.930782	1.29151e-05	-0.634168	0.00471307	-0.558423	0.0651633	ENSG00000150347
ENSG00000166233	ARIH1	25820	-0.123324	0.369081	-0.236879	0.0554101	-0.108654	0.737983	-0.454859	0.00861183	-0.571889	0.00102151	-0.22473	0.999548	0.331535	0.000959492	0.33501	0.00116825	0.116075	0.546602	ENSG00000166233
ENSG00000177479	ARIH2	10425	-0.467106	1.3997e-05	-0.202323	0.0749753	-0.122187	0.648886	-1.05902	1.49267e-14	-0.715593	8.87947e-07	-0.459908	0.0696922	0.591913	2.53155e-12	0.51327	3.03877e-09	0.337721	0.0018971	ENSG00000177479
ENSG00000120805	ARL1	400	-0.202998	0.200934	-0.370583	0.0112656	-0.272062	0.322149	-0.367281	0.122371	-0.511766	0.0266836	-0.29981	0.999548	0.164283	0.238682	0.141183	0.351107	0.0277484	0.939985	ENSG00000120805
ENSG00000175414	ARL10	285598	-1.05118	0.144969	-0.822498	0.216333	-0.164425	0.945279	-0.0863755	0.962888	-0.283319	NA	0.124663	0.999548	-0.964801	0.107397	-0.539178	0.405953	-0.289088	0.830433	ENSG00000175414
ENSG00000152213	ARL11	115761	-1.66882	NA	-2.34989	NA	-1.56546	NA	-1.7622	NA	-2.29089	NA	-1.60381	NA	0.0933827	NA	-0.0590039	NA	0.0383477	NA	ENSG00000152213
ENSG00000174225	ARL13A	392509	3.20992	0.137028	0.691146	NA	1.73164	NA	1.33542	NA	-0.424209	NA	0.937984	NA	1.87449	NA	1.11535	NA	0.793658	NA	ENSG00000174225
ENSG00000169379	ARL13B	200894	0.585329	0.00176063	0.514184	0.00634339	0.200531	0.676426	0.174862	0.665533	0.0869701	0.863148	0.018846	0.999548	0.410467	0.0131102	0.427214	0.0120345	0.181685	0.563023	ENSG00000169379
ENSG00000179674	ARL14	80117	0.046829	0.987021	0.521988	NA	0.468921	NA	3.00043	NA	0.173552	NA	1.14389	NA	-2.9536	NA	0.348436	NA	-0.674967	NA	ENSG00000179674
ENSG00000152219	ARL14EP	120534	-0.13059	0.632508	0.119949	0.656869	-0.208428	0.730929	-0.505617	0.17869	-0.195211	0.71208	-0.198509	0.999548	0.375027	0.0650983	0.31516	0.150164	-0.00991846	0.988271	ENSG00000152219
ENSG00000268223	ARL14EPL	644100	-2.46304	0.297507	-3.14413	NA	-1.1384	NA	-0.764338	NA	-2.6505	NA	-0.726489	NA	-1.69871	NA	-0.493624	NA	-0.411908	NA	ENSG00000268223
ENSG00000185305	ARL15	54622	-0.229851	0.422958	0.262808	0.324317	-0.107634	0.898507	-0.33022	0.540304	-0.00615432	0.994049	0.17291	0.999548	0.100369	0.748391	0.268962	0.356386	-0.280544	0.574633	ENSG00000185305
ENSG00000214087	ARL16	339231	0.0335373	0.921441	0.560909	0.0233854	0.470064	0.302526	0.172357	0.758129	0.326849	0.514391	0.254878	0.999548	-0.13882	0.579991	0.23406	0.344078	0.215186	0.604346	ENSG00000214087
ENSG00000185829	ARL17A	51326	-0.143044	0.964281	1.23575	NA	-0.0227288	NA	-0.238347	NA	1.0475	NA	-0.205331	NA	0.095303	NA	0.188246	NA	0.182602	NA	ENSG00000185829
ENSG00000228696	ARL17B	51326	1.26452	0.616035	-0.170155	NA	-1.33279	NA	0.923479	NA	-0.842655	NA	-1.79651	NA	0.341038	NA	0.6725	NA	0.463719	NA	ENSG00000228696
ENSG00000213465	ARL2	402	-0.52363	0.00547764	-0.640638	0.000508568	0.169451	0.740751	-0.0612136	0.900267	-0.256116	0.508535	0.0243143	0.999548	-0.462416	0.00428473	-0.384522	0.0244208	0.145137	0.667654	ENSG00000213465
ENSG00000102931	ARL2BP	23568	-0.369964	0.201526	-0.608953	0.0248723	-0.115084	0.905608	-0.482751	0.300449	-0.326718	0.557839	-0.100904	0.999548	0.112787	0.681221	-0.282235	0.283031	-0.0141806	0.985299	ENSG00000102931
ENSG00000138175	ARL3	403	-0.643751	0.0146174	-0.211495	0.477288	0.0542461	0.962391	-0.319049	0.540092	0.0529828	0.949874	-0.0104673	0.999548	-0.324702	0.174266	-0.264478	0.308989	0.0647133	0.914263	ENSG00000138175
ENSG00000122644	ARL4A	10124	-0.507982	0.024097	-0.205598	0.37868	-0.495557	0.152421	-0.356811	0.350804	-0.0275045	0.967269	-0.271224	0.999548	-0.151171	0.440531	-0.178094	0.383651	-0.224333	0.470787	ENSG00000122644
ENSG00000188042	ARL4C	10123	1.37223	0.656045	3.13802	NA	2.62921	NA	-0.191669	NA	1.46898	NA	1.55236	NA	1.5639	NA	1.66905	NA	1.07685	NA	ENSG00000188042
ENSG00000175906	ARL4D	379	-0.47916	0.0290483	-0.190949	0.426116	0.296209	0.514933	0.0669305	0.904225	0.211902	0.652528	0.408254	0.999548	-0.546091	0.00267469	-0.40285	0.0375731	-0.112045	0.797417	ENSG00000175906
ENSG00000162980	ARL5A	26225	-0.54757	0.0794898	-0.595748	0.0308784	-0.590034	0.191304	-0.792067	0.0411532	-0.783844	0.0378116	-0.850117	0.284101	0.244497	0.154105	0.188097	0.316907	0.260083	0.326734	ENSG00000162980
ENSG00000165997	ARL5B	221079	0.913793	0.00295665	0.360057	0.295899	0.0811725	0.95376	0.0983387	0.905934	-0.291601	0.694152	-0.129677	0.999548	0.815454	0.00445835	0.651658	0.0330093	0.21085	0.753969	ENSG00000165997
ENSG00000141748	ARL5C	390790	2.33391	NA	0.691056	NA	0.490224	NA	2.24027	NA	0.749823	NA	0.451655	NA	0.0936347	NA	-0.058767	NA	0.0385693	NA	ENSG00000141748
ENSG00000113966	ARL6	84100	-0.557039	0.0115709	-0.312185	0.150606	0.0597751	0.942181	-0.769089	0.0209788	-0.737555	0.0286477	-0.137578	0.999548	0.21205	0.340349	0.42537	0.0403705	0.197353	0.623035	ENSG00000113966
ENSG00000170540	ARL6IP1	23204	0.284452	0.30975	-0.160551	0.590828	-0.163562	0.836123	0.409107	0.3657	0.114405	0.863803	-0.061774	0.999548	-0.124655	0.623673	-0.274957	0.263614	-0.101788	0.852256	ENSG00000170540
ENSG00000182196	ARL6IP4	51329	-0.318529	0.246561	-0.0347862	0.917301	0.323015	0.568764	-0.159864	0.776906	0.0294047	0.970174	0.30922	0.999548	-0.158665	0.518894	-0.0641909	0.826662	0.0137948	0.985299	ENSG00000182196
ENSG00000144746	ARL6IP5	10550	-0.0428592	0.815892	0.142302	0.364553	-0.143562	0.691578	0.156602	0.585551	0.271965	0.291772	0.0758509	0.999548	-0.199461	0.113919	-0.129662	0.359931	-0.219413	0.243902	ENSG00000144746
ENSG00000177917	ARL6IP6	151188	0.397223	0.0191007	0.3201	0.0618322	0.0477031	0.944907	0.405553	0.1359	0.327642	0.285166	0.189733	0.999548	-0.00833015	0.967647	-0.00754131	0.972951	-0.14203	0.628206	ENSG00000177917
ENSG00000143862	ARL8A	127829	-0.33871	0.296061	-0.275836	0.400427	0.0465481	0.972479	0.114602	0.873723	-0.00654575	0.994068	0.126091	0.999548	-0.453312	0.0795279	-0.26929	0.357969	-0.079543	0.905935	ENSG00000143862
ENSG00000134108	ARL8B	55207	0.303271	0.167933	0.312068	0.152513	0.00216047	0.998243	0.116023	0.810049	0.140046	0.781722	0.0147135	0.999548	0.187248	0.336648	0.172022	0.41501	-0.012553	0.983838	ENSG00000134108
ENSG00000196503	ARL9	132946	1.37225	NA	0.691173	NA	2.54319	NA	-1.09467	NA	-2.23322	NA	1.78333	NA	2.46693	NA	2.92439	NA	0.759851	NA	ENSG00000196503
ENSG00000104442	ARMC1	55156	-0.114835	0.590204	-0.171198	0.390115	0.0292938	0.971524	-0.371569	0.217716	-0.686726	0.0121195	-0.120866	0.999548	0.256734	0.115634	0.515529	0.000950601	0.15016	0.631745	ENSG00000104442
ENSG00000170632	ARMC10	83787	-0.455722	0.105339	-0.994071	0.000108114	-0.0523906	0.962391	-0.489481	0.263444	-0.344252	0.508919	-0.200704	0.999548	0.0337585	0.900158	-0.649819	0.00187418	0.148313	0.745481	ENSG00000170632
ENSG00000118690	ARMC2	84071	-1.48198	0.00105866	-0.809173	0.0383126	-0.0210555	0.988397	-0.780153	0.304868	-0.122364	0.914729	-0.00983616	0.999548	-0.70183	0.0408822	-0.686809	0.0512666	-0.0112193	0.99082	ENSG00000118690
ENSG00000165309	ARMC3	219681	2.33386	NA	3.6241	NA	1.47423	NA	2.96149	NA	3.68276	NA	2.1569	NA	-0.62763	NA	-0.0586616	NA	-0.682676	NA	ENSG00000165309
ENSG00000140691	ARMC5	79798	0.787479	0.000681338	0.94572	3.13351e-05	0.348747	0.49202	0.468739	0.242438	0.603638	0.129618	0.418263	0.999548	0.31874	0.127851	0.342082	0.117104	-0.0695165	0.895873	ENSG00000140691
ENSG00000105676	ARMC6	93436	0.339222	0.0950712	0.584686	0.00212792	0.38753	0.272625	-0.00565949	0.991082	-0.175781	0.68833	-0.00285957	0.999548	0.344881	0.039804	0.760467	2.18916e-06	0.39039	0.096508	ENSG00000105676
ENSG00000125449	ARMC7	79637	0.0534881	0.854462	-0.108917	0.678815	0.287746	0.538735	0.0728778	0.897269	0.0297737	0.967185	-0.117791	0.999548	-0.0193897	0.940664	-0.138691	0.557821	0.405537	0.143764	ENSG00000125449
ENSG00000114098	ARMC8	25852	0.335451	0.0335192	0.130568	0.453968	-0.0972193	0.840694	-0.037584	0.926952	-0.0999776	0.793513	-0.348791	0.999548	0.373035	0.00486129	0.230545	0.11581	0.251572	0.223609	ENSG00000114098
ENSG00000135931	ARMC9	80210	-0.310334	0.173391	-0.577351	0.00610983	-0.137067	0.834325	0.0361425	0.949759	0.0237384	0.971241	0.140022	0.999548	-0.346477	0.0632692	-0.60109	0.00102764	-0.277088	0.357063	ENSG00000135931
ENSG00000126947	ARMCX1	51309	-0.320709	0.640748	-0.508682	0.406336	-0.0691429	0.975742	-0.234208	0.862594	0.077323	NA	0.288959	0.999548	-0.0865014	0.885266	-0.586005	0.280547	-0.358102	0.727591	ENSG00000126947
ENSG00000184867	ARMCX2	9823	-0.541676	0.0988099	-0.828426	0.00722089	-0.780131	0.111983	0.265236	0.689877	0.198589	0.795322	-0.094141	0.999548	-0.806912	0.00213222	-1.02701	0.000113967	-0.68599	0.0600875	ENSG00000184867
ENSG00000102401	ARMCX3	51566	-0.288476	0.0316303	-0.104019	0.483519	-0.141071	0.661431	-0.171429	0.503127	-0.196342	0.445728	0.101468	0.999548	-0.117047	0.345781	0.0923235	0.498904	-0.242539	0.144727	ENSG00000102401
ENSG00000196440	ARMCX4	100131755	-1.60878	0.269779	1.00389	0.191036	0.606373	0.76669	-0.329832	0.902498	1.67325	0.105787	1.24725	0.999548	-1.27895	0.00177089	-0.66936	0.126078	-0.640874	0.326961	ENSG00000196440
ENSG00000125962	ARMCX5	64860	-0.122423	0.499337	0.129283	0.453087	0.0535611	0.931475	-0.254876	0.360403	-0.345926	0.196749	-0.128185	0.999548	0.132453	0.369853	0.475209	0.000286464	0.181746	0.435506	ENSG00000125962
ENSG00000198960	ARMCX6	54470	-0.0410525	0.906777	0.420982	0.0980359	-0.224046	0.744693	0.0502417	0.940607	0.304951	0.535647	-0.443287	0.999548	-0.0912942	0.708998	0.116031	0.650167	0.219242	0.559909	ENSG00000198960
ENSG00000198520	ARMH1	339541	-3.12683	0.0543191	-1.8966	0.110756	0.277358	0.935503	-1.81459	NA	-0.453833	NA	0.662124	0.999548	-1.31224	0.090722	-1.44276	0.0721093	-0.384765	0.821373	ENSG00000198520
ENSG00000120029	ARMH3	79591	-0.205097	0.282222	-0.200266	0.276137	-0.135658	0.770827	-0.15242	0.676398	-0.11074	0.789861	0.100583	0.999548	-0.0526773	0.771789	-0.0895258	0.630943	-0.236242	0.327826	ENSG00000120029
ENSG00000139971	ARMH4	145407	0.271748	0.909994	-0.33386	NA	-0.550685	NA	0.392324	NA	-0.142577	NA	0.526526	0.999548	-0.120577	0.93225	-0.191283	0.897176	-1.07721	NA	ENSG00000139971
ENSG00000146476	ARMT1	79624	0.0952016	0.62901	0.0356115	0.865262	-0.155645	0.721918	0.0920701	0.814772	0.212277	0.537227	-0.229102	0.999548	0.0031315	0.987407	-0.176666	0.295134	0.0734571	0.842284	ENSG00000146476
ENSG00000143437	ARNT	405	-0.101963	0.481488	0.03489	0.823618	-0.0524029	0.907887	0.132092	0.61041	0.182576	0.46315	0.0199899	0.999548	-0.234055	0.0326371	-0.147686	0.224923	-0.0723928	0.769369	ENSG00000143437
ENSG00000172379	ARNT2	9915	-3.2467	NA	-3.92777	NA	-3.152	NA	-1.61947	NA	-3.47541	NA	-0.7484	NA	-1.62722	NA	-0.452363	NA	-2.4036	NA	ENSG00000172379
ENSG00000133794	ARNTL	406	-0.799746	0.00285315	-0.694661	0.00875364	-0.286014	0.659287	-1.09206	0.00374932	-0.921961	0.0248434	-0.369604	0.999548	0.29231	0.224829	0.2273	0.393132	0.0835904	0.888133	ENSG00000133794
ENSG00000029153	ARNTL2	56938	0.890877	0.00124126	0.482348	0.0998006	0.132142	0.891746	0.250789	0.658815	0.494589	0.325663	0.0544384	0.999548	0.640088	0.00280495	-0.0122407	0.970356	0.0777039	0.89401	ENSG00000029153
ENSG00000241685	ARPC1A	10552	-0.111936	0.710246	-0.123023	0.664204	-0.363932	0.46149	0.103181	0.85642	0.20456	0.695576	-0.210841	0.999548	-0.215118	0.295759	-0.327583	0.11099	-0.153091	0.704413	ENSG00000241685
ENSG00000130429	ARPC1B	10095	0.0292047	0.945392	-0.194946	0.586484	-0.109652	0.929906	0.302358	0.63722	0.159411	0.837411	0.0184394	0.999548	-0.273154	0.346858	-0.354357	0.234723	-0.128091	0.847452	ENSG00000130429
ENSG00000163466	ARPC2	10109	-0.127661	0.384129	-0.191477	0.166711	-0.0578532	0.898046	-0.326014	0.112699	-0.362717	0.0903282	-0.085622	0.999548	0.198353	0.0825523	0.171241	0.164454	0.0277688	0.92783	ENSG00000163466
ENSG00000111229	ARPC3	10094	-0.83211	0.000751684	-0.268553	0.341012	-0.188824	0.801783	-0.0914024	0.884823	-0.118457	0.859062	-0.0893263	0.999548	-0.740707	0.00047413	-0.150095	0.580973	-0.0994979	0.857512	ENSG00000111229
ENSG00000241553	ARPC4	10093	1.54564	0.281368	0.656172	0.684578	0.724704	0.863798	0.512792	NA	0.283759	NA	0.21836	0.999548	1.03285	0.314089	0.372413	0.770764	0.506344	0.832973	ENSG00000241553
ENSG00000162704	ARPC5	10092	-0.67595	3.99592e-05	-0.685243	3.56122e-05	-0.316743	0.340026	-0.182091	0.609426	-0.303892	0.350759	-0.0379479	0.999548	-0.493859	0.000635183	-0.381351	0.0126639	-0.278795	0.220438	ENSG00000162704
ENSG00000136950	ARPC5L	81873	0.142834	0.723889	0.11918	0.77263	0.154099	0.891344	-0.324812	0.63407	-0.181222	0.824947	-0.0202067	0.999548	0.467647	0.109109	0.300402	0.361013	0.174306	0.792724	ENSG00000136950
ENSG00000242498	ARPIN	348110	-3.14777	0.0802661	-2.86706	NA	-0.192002	NA	-2.49861	NA	-2.7407	NA	0.300054	0.999548	-0.649156	0.603796	-0.126365	0.929408	-0.492057	NA	ENSG00000242498
ENSG00000128989	ARPP19	10776	-0.785201	0.00203439	-0.381484	0.164758	-0.0724276	0.945437	-0.95612	0.0103143	-0.1939	0.757597	-0.0571477	0.999548	0.17092	0.502535	-0.187584	0.489155	-0.0152799	0.984957	ENSG00000128989
ENSG00000172995	ARPP21	10777	1.37217	NA	0.691094	NA	0.490234	NA	0.558711	NA	0.0490875	NA	1.17301	NA	0.81346	NA	0.642007	NA	-0.682772	NA	ENSG00000172995
ENSG00000120500	ARR3	407	1.37216	NA	1.65285	NA	0.490239	NA	0.55724	NA	1.71162	NA	0.451692	NA	0.814922	NA	-0.0587745	NA	0.0385468	NA	ENSG00000120500
ENSG00000137486	ARRB1	408	-0.540542	0.00182627	-0.535187	0.00155202	-0.272502	0.432847	0.00107166	0.997637	0.0290255	0.959501	0.210576	0.999548	-0.541614	0.000134753	-0.564212	9.77964e-05	-0.483077	0.00928912	ENSG00000137486
ENSG00000141480	ARRB2	409	0.0337666	0.902074	0.22272	0.319705	-0.0408386	0.96259	-0.0363834	0.946809	0.00713562	0.991423	0.0451629	0.999548	0.07015	0.737237	0.215584	0.269253	-0.0860015	0.842498	ENSG00000141480
ENSG00000197070	ARRDC1	92714	-0.185193	0.25272	-0.450972	0.0016398	0.0689368	0.884712	0.157544	0.599333	0.153184	0.623717	0.119123	0.999548	-0.342737	0.00439487	-0.604157	3.56926e-07	-0.0501864	0.872273	ENSG00000197070
ENSG00000105643	ARRDC2	27106	0.483378	0.0185303	0.324447	0.122286	0.139881	0.815129	-0.151015	0.729424	-0.119156	0.806087	0.160553	0.999548	0.634393	7.12958e-05	0.443603	0.00923265	-0.0206718	0.969731	ENSG00000105643
ENSG00000113369	ARRDC3	57561	1.15678	3.31752e-07	0.744313	0.00173065	-0.177851	0.805542	0.364882	0.415482	0.0643543	0.930976	0.040988	0.999548	0.791899	9.84952e-05	0.679959	0.00134192	-0.218839	0.599263	ENSG00000113369
ENSG00000140450	ARRDC4	91947	0.480669	0.220568	0.399268	0.299622	0.189896	0.868118	-0.146037	0.871636	-0.323097	0.692772	-0.272929	0.999548	0.626707	0.0561512	0.722365	0.0297036	0.462826	0.40047	ENSG00000140450
ENSG00000205784	ARRDC5	645432	-1.69805	NA	-2.37913	NA	-0.432226	NA	-0.365035	NA	-0.893725	NA	0.955807	NA	-1.33302	NA	-1.4854	NA	-1.38803	NA	ENSG00000205784
ENSG00000100299	ARSA	410	0.100177	0.72173	-0.00359457	0.990286	0.0842602	0.923072	0.606673	0.073591	0.428856	0.270331	0.307983	0.999548	-0.506496	0.00395273	-0.432451	0.0187166	-0.223723	0.481561	ENSG00000100299
ENSG00000113273	ARSB	411	0.80072	0.000387974	0.486414	0.0398371	0.241749	0.683437	0.555491	0.13024	0.341417	0.450359	0.194653	0.999548	0.245229	0.232582	0.144997	0.538078	0.0470952	0.929586	ENSG00000113273
ENSG00000006756	ARSD	414	0.41042	NA	4.70936	NA	2.00111	NA	0.316836	NA	4.76815	NA	0.386075	NA	0.0935844	NA	-0.0587817	NA	1.61504	NA	ENSG00000006756
ENSG00000062096	ARSF	416	1.37218	NA	0.691134	NA	0.490273	NA	1.27862	NA	-0.646004	NA	0.451763	NA	0.0935611	NA	1.33714	NA	0.0385107	NA	ENSG00000062096
ENSG00000141337	ARSG	22901	-0.416574	0.350284	-0.108249	0.802122	0.325858	0.694223	0.334325	0.648023	0.488472	0.426027	0.423329	0.999548	-0.750899	0.000996789	-0.596721	0.0114059	-0.0974709	0.865888	ENSG00000141337
ENSG00000205667	ARSH	347527	1.37217	NA	0.691091	NA	0.490274	NA	1.27858	NA	0.749896	NA	-0.269582	NA	0.0935822	NA	-0.0588045	NA	0.759857	NA	ENSG00000205667
ENSG00000183876	ARSI	340075	2.13069	0.236941	2.46127	NA	1.48788	NA	2.04943	NA	2.53979	NA	1.45232	0.999548	0.0812648	0.975186	-0.0785246	0.98033	0.0355636	NA	ENSG00000183876
ENSG00000180801	ARSJ	79642	1.68941	5.72391e-07	1.70237	2.63911e-07	0.577446	0.443834	0.396279	0.561217	0.49723	0.455138	-0.43024	0.999548	1.29313	3.82424e-07	1.20514	3.98496e-06	1.00769	0.00176786	ENSG00000180801
ENSG00000164291	ARSK	153642	0.668005	0.0128216	0.553694	0.0383126	0.0935625	0.931475	0.0923951	0.888521	-0.0100032	0.990298	-0.377969	0.999548	0.57561	0.0089938	0.563698	0.0134542	0.471532	0.149987	ENSG00000164291
ENSG00000157399	ARSL	415	1.37203	NA	0.690958	NA	2.56912	NA	1.99963	NA	1.47094	NA	3.25174	NA	-0.627598	NA	-0.779984	NA	-0.682616	NA	ENSG00000157399
ENSG00000129744	ART1	417	1.37211	NA	0.691032	NA	2.60401	NA	1.27847	NA	0.749781	NA	2.56539	NA	0.0936377	NA	-0.058749	NA	0.0386203	NA	ENSG00000129744
ENSG00000156219	ART3	419	1.37209	NA	0.690996	NA	1.43988	NA	1.2784	NA	1.47102	NA	2.12255	NA	0.093687	NA	-0.780025	NA	-0.682674	NA	ENSG00000156219
ENSG00000167311	ART5	116969	1.37224	NA	0.691164	NA	0.490303	NA	-0.119426	NA	-0.671991	NA	0.451837	NA	1.49167	NA	1.36316	NA	0.0384663	NA	ENSG00000167311
ENSG00000117407	ARTN	9048	-1.082	0.0346064	-1.18364	0.0131171	-0.412323	0.729361	-0.0944113	0.940069	-0.06064	0.967185	0.226565	0.999548	-0.987589	0.0040001	-1.123	0.00136002	-0.638889	0.229972	ENSG00000117407
ENSG00000173409	ARV1	64801	-0.259682	0.129863	-0.20485	0.23247	-0.261041	0.421938	0.411162	0.117018	0.346711	0.230111	0.038456	0.999548	-0.670844	1.04558e-06	-0.551561	8.99622e-05	-0.299497	0.151469	ENSG00000173409
ENSG00000099889	ARVCF	421	-0.403406	0.409513	-1.01749	0.0189675	-0.143867	0.93121	0.342679	0.702467	0.346903	0.7278	0.246091	0.999548	-0.746085	0.0317934	-1.36439	9.12859e-05	-0.389958	0.531252	ENSG00000099889
ENSG00000004848	ARX	170302	-0.147167	NA	0.618708	NA	1.54566	NA	1.08684	NA	0.390955	NA	1.9276	NA	-1.23401	NA	0.227753	NA	-0.381933	NA	ENSG00000004848
ENSG00000214435	AS3MT	57412	1.37212	NA	0.691081	NA	0.490207	NA	1.96926	NA	-0.652983	NA	1.1424	NA	-0.597142	NA	1.34406	NA	-0.652192	NA	ENSG00000214435
ENSG00000104763	ASAH1	427	0.506815	0.00234321	0.0419895	0.846806	0.0431652	0.954322	0.680698	0.00439435	0.459182	0.104266	0.0726058	0.999548	-0.173884	0.268687	-0.417193	0.00500176	-0.0294405	0.942529	ENSG00000104763
ENSG00000188611	ASAH2	56624	0.249802	0.85955	0.197961	0.881206	-0.558481	NA	-1.07483	NA	-1.65091	NA	-1.02105	0.999548	1.32463	0.388169	1.84887	0.215909	0.462566	NA	ENSG00000188611
ENSG00000204147	ASAH2B	653308	-0.199469	0.788691	-0.552696	0.387701	-0.21439	0.923152	-0.594957	0.640612	-1.05249	NA	-0.352934	0.999548	0.395488	0.536986	0.499797	0.445286	0.138544	0.928868	ENSG00000204147
ENSG00000153317	ASAP1	50807	-0.671707	8.87661e-05	-0.419242	0.0164071	-0.175049	0.693052	-0.710075	0.00376396	-0.398851	0.183914	-0.31608	0.999548	0.0383679	0.834514	-0.0203905	0.920115	0.141031	0.623901	ENSG00000153317
ENSG00000151693	ASAP2	8853	-0.0136704	0.964916	-0.192635	0.412304	0.116828	0.861491	-0.345831	0.354379	-0.235297	0.595264	-0.182201	0.999548	0.33216	0.0693834	0.0426624	0.864149	0.299029	0.295098	ENSG00000151693
ENSG00000088280	ASAP3	55616	-0.857125	0.012664	-1.18017	0.000332805	-0.236203	0.806898	0.127175	0.879357	-0.0418308	0.969947	0.0826623	0.999548	-0.984299	0.000400788	-1.13834	5.75081e-05	-0.318865	0.540197	ENSG00000088280
ENSG00000065802	ASB1	51665	0.204613	0.347439	0.167122	0.434589	0.240021	0.569505	0.0556464	0.909576	0.235824	0.543073	0.0777383	0.999548	0.148967	0.402955	-0.0687019	0.747672	0.162283	0.601217	ENSG00000065802
ENSG00000146926	ASB10	136371	1.37217	NA	0.691106	NA	0.490259	NA	1.27858	NA	0.0285857	NA	0.451728	NA	0.0935822	NA	0.66252	NA	0.0385318	NA	ENSG00000146926
ENSG00000165192	ASB11	140456	1.37208	NA	0.691001	NA	0.490169	NA	1.99971	NA	1.47102	NA	1.17285	NA	-0.62763	NA	-0.780017	NA	-0.682681	NA	ENSG00000165192
ENSG00000198881	ASB12	142689	1.37224	NA	0.691192	NA	0.490332	NA	0.557419	NA	-1.30412	NA	-0.269438	NA	0.814821	NA	1.99532	NA	0.75977	NA	ENSG00000198881
ENSG00000196372	ASB13	79754	-0.0603651	0.865529	-0.0456668	0.895493	0.364464	0.523222	0.168194	0.782028	0.0151556	0.984957	0.0516898	0.999548	-0.228559	0.369035	-0.0608224	0.847461	0.312774	0.429986	ENSG00000196372
ENSG00000239388	ASB14	142686	0.410455	NA	-0.27062	NA	-0.471452	NA	0.316926	NA	-0.211763	NA	-0.509932	NA	0.0935296	NA	-0.058857	NA	0.0384792	NA	ENSG00000239388
ENSG00000161664	ASB16	92591	1.37224	NA	1.65294	NA	1.44001	NA	-0.700221	NA	-0.365352	NA	1.40153	NA	2.07246	NA	2.01829	NA	0.0384732	NA	ENSG00000161664
ENSG00000154007	ASB17	127247	2.33373	NA	0.69088	NA	1.43976	NA	3.74516	NA	2.25471	NA	2.90625	NA	-1.41143	NA	-1.56383	NA	-1.46648	NA	ENSG00000154007
ENSG00000182177	ASB18	401036	1.37209	NA	0.691031	NA	0.490184	NA	1.99974	NA	0.749746	NA	1.17289	NA	-0.627653	NA	-0.0587145	NA	-0.682703	NA	ENSG00000182177
ENSG00000100628	ASB2	51676	-1.85758	NA	-0.964512	NA	-2.73949	NA	-0.531449	NA	0.513988	NA	-1.35831	NA	-1.32613	NA	-1.4785	NA	-1.38118	NA	ENSG00000100628
ENSG00000115239	ASB3	51130	0.0839993	0.665878	-0.0552048	0.782305	-0.154929	0.711928	-0.0935571	0.804478	-0.239102	0.457909	-0.166237	0.999548	0.177556	0.244126	0.183897	0.25253	0.0113077	0.981393	ENSG00000115239
ENSG00000005981	ASB4	51666	0.410455	NA	-0.27062	NA	-0.471452	NA	0.316926	NA	-0.211763	NA	-0.509932	NA	0.0935296	NA	-0.058857	NA	0.0384792	NA	ENSG00000005981
ENSG00000164122	ASB5	140458	-0.500295	NA	-1.18137	NA	-1.38219	NA	-0.593731	NA	-1.12242	NA	-2.1419	NA	0.093436	NA	-0.0589506	NA	0.759711	NA	ENSG00000164122
ENSG00000148331	ASB6	140459	0.715492	6.28046e-06	0.53137	0.00112657	0.272423	0.425553	-0.0299513	0.946809	-0.0662534	0.887226	0.161275	0.999548	0.745443	3.17596e-08	0.597623	1.8854e-05	0.111148	0.723464	ENSG00000148331
ENSG00000183475	ASB7	140460	-0.384305	0.0570349	-0.175827	0.390682	-0.0793437	0.90002	-1.05305	3.92734e-05	-0.842104	0.00167474	-0.495767	0.972554	0.668742	1.20866e-05	0.666277	1.83987e-05	0.416423	0.0584294	ENSG00000183475
ENSG00000177981	ASB8	140461	-0.126149	0.396026	0.0704275	0.638834	-0.0163959	0.975742	0.00468411	0.989533	0.0399715	0.916761	0.0432215	0.999548	-0.130834	0.305327	0.030456	0.848464	-0.0596174	0.838283	ENSG00000177981
ENSG00000102048	ASB9	140462	-1.48079	0.000138687	-1.20038	0.00217831	-0.398482	0.697038	0.122296	0.905721	-0.430077	0.612684	-0.021236	0.999548	-1.60309	7.07548e-07	-0.770302	0.0287065	-0.377246	0.546602	ENSG00000102048
ENSG00000138303	ASCC1	51008	-0.0520402	0.75703	-0.139065	0.34693	-0.220542	0.419319	0.146038	0.601283	-0.0275346	0.949557	-0.112324	0.999548	-0.198079	0.10753	-0.111531	0.427972	-0.108218	0.653896	ENSG00000138303
ENSG00000100325	ASCC2	84164	-0.293912	0.0284869	0.0904432	0.544912	0.107833	0.761326	-0.231042	0.306155	-0.145113	0.588612	0.00356074	0.999548	-0.0628693	0.620247	0.235557	0.0364831	0.104272	0.625756	ENSG00000100325
ENSG00000112249	ASCC3	10973	-0.070951	0.771197	0.152786	0.489321	0.0911697	0.890681	-0.347421	0.30071	-0.389457	0.263854	-0.15021	0.999548	0.27647	0.106803	0.542243	0.00104637	0.24138	0.385448	ENSG00000112249
ENSG00000139352	ASCL1	429	1.3719	NA	0.690843	NA	0.489996	NA	3.80789	NA	2.55789	NA	2.98103	NA	-2.43598	NA	-1.86704	NA	-2.49103	NA	ENSG00000139352
ENSG00000183734	ASCL2	430	-1.01831	NA	-1.69939	NA	-1.90022	NA	-1.11173	NA	-1.64042	NA	-1.93859	NA	0.0934181	NA	-0.0589685	NA	0.0383677	NA	ENSG00000183734
ENSG00000176009	ASCL3	56676	1.37202	NA	0.690944	NA	3.22695	NA	1.99961	NA	1.47092	NA	3.90954	NA	-0.627588	NA	-0.779974	NA	-0.682595	NA	ENSG00000176009
ENSG00000187855	ASCL4	121549	1.37217	NA	0.691091	NA	0.490274	NA	1.27858	NA	0.749896	NA	-0.269582	NA	0.0935822	NA	-0.0588045	NA	0.759857	NA	ENSG00000187855
ENSG00000232237	ASCL5	647219	1.37216	NA	1.65285	NA	0.490239	NA	0.55724	NA	1.71162	NA	0.451692	NA	0.814922	NA	-0.0587745	NA	0.0385468	NA	ENSG00000232237
ENSG00000286053	ASDURF	110599588	-0.0313183	0.950516	-0.178301	0.671947	0.283336	0.763114	-0.735191	0.219738	-0.553447	0.424595	-0.144837	0.999548	0.703873	0.0230048	0.375146	0.293803	0.428173	0.429032	ENSG00000286053
ENSG00000111875	ASF1A	25842	-0.582939	0.000163225	-0.474771	0.00246018	-0.238401	0.478544	-0.565373	0.0158815	-0.736835	0.00160105	-0.396967	0.999548	-0.017566	0.924212	0.262064	0.0769503	0.158566	0.534887	ENSG00000111875
ENSG00000105011	ASF1B	55723	-0.698729	0.00687593	-0.987141	8.84705e-05	-0.49259	0.315254	0.25405	0.641548	-0.161281	0.802043	0.114816	0.999548	-0.952779	9.02083e-06	-0.82586	0.000201419	-0.607406	0.0440552	ENSG00000105011
ENSG00000141505	ASGR1	432	1.37224	NA	0.691162	NA	2.23508	NA	0.55734	NA	-1.30023	NA	0.80242	NA	0.814899	NA	1.99139	NA	1.43266	NA	ENSG00000141505
ENSG00000161944	ASGR2	433	1.37217	NA	0.691091	NA	0.490274	NA	1.27858	NA	0.749896	NA	-0.269582	NA	0.0935822	NA	-0.0588045	NA	0.759857	NA	ENSG00000161944
ENSG00000116539	ASH1L	55870	0.113253	0.612375	0.343994	0.0746836	0.013535	0.986349	-0.365662	0.247077	-0.0336294	0.95625	-0.119184	0.999548	0.478915	0.00199703	0.377623	0.0219144	0.132719	0.695134	ENSG00000116539
ENSG00000129691	ASH2L	9070	-0.0798961	0.57746	-0.275154	0.0223303	-0.0679642	0.859872	0.272113	0.170035	0.139495	0.582967	0.112797	0.999548	-0.352009	0.0005462	-0.414649	5.84559e-05	-0.180761	0.271781	ENSG00000129691
ENSG00000110881	ASIC1	41	-1.38814	0.00185903	-1.4334	0.00086726	-0.0562662	0.975742	0.198448	0.851204	-0.294082	0.780175	0.213086	0.999548	-1.58658	3.17899e-06	-1.13932	0.00133539	-0.269353	0.725005	ENSG00000110881
ENSG00000108684	ASIC2	40	2.70956	NA	0.69113	NA	-0.471498	NA	2.60122	NA	0.707017	NA	-0.465665	NA	0.108339	NA	-0.0158864	NA	-0.00583391	NA	ENSG00000108684
ENSG00000213199	ASIC3	9311	1.37223	0.603299	1.65294	0.519084	1.4485	NA	-0.0128215	NA	1.29724	NA	0.225842	0.999548	1.38505	0.219111	0.355692	0.812156	1.22265	NA	ENSG00000213199
ENSG00000072182	ASIC4	55515	1.37217	NA	0.691106	NA	0.490259	NA	1.27858	NA	0.0285857	NA	0.451728	NA	0.0935822	NA	0.66252	NA	0.0385318	NA	ENSG00000072182
ENSG00000256394	ASIC5	51802	4.57705	NA	0.691024	NA	0.490208	NA	4.48337	NA	0.749779	NA	-0.269699	NA	0.0936822	NA	-0.0587545	NA	0.759907	NA	ENSG00000256394
ENSG00000126522	ASL	435	-0.355697	0.132463	-0.209897	0.389274	0.0891471	0.912498	0.183152	0.700039	0.00576534	0.993445	0.166469	0.999548	-0.538849	0.00377379	-0.215662	0.317915	-0.0773223	0.872273	ENSG00000126522
ENSG00000196433	ASMT	438	-2.06896	0.36816	-0.950579	NA	0.746871	NA	-2.15041	NA	-0.0671996	NA	1.33372	NA	0.0814454	NA	-0.883379	NA	-0.586853	NA	ENSG00000196433
ENSG00000169093	ASMTL	8623	-0.332693	0.0912831	-0.179323	0.391755	0.101059	0.867736	0.170212	0.667509	0.19813	0.623124	0.209906	0.999548	-0.502905	0.00135454	-0.377453	0.0237197	-0.108847	0.765199	ENSG00000169093
ENSG00000070669	ASNS	440	-1.25906	1.92703e-11	-1.00101	1.37006e-07	-0.260286	0.562619	-0.70742	0.0171564	-0.619288	0.0562775	-0.0623479	0.999548	-0.551637	0.00121239	-0.381719	0.0367101	-0.197938	0.538977	ENSG00000070669
ENSG00000138381	ASNSD1	54529	-0.643781	0.00134354	-0.249246	0.240601	-0.373049	0.309123	-1.04608	8.37284e-05	-0.652961	0.0296215	-0.647591	0.391682	0.4023	0.0118411	0.403715	0.0146865	0.274543	0.281851	ENSG00000138381
ENSG00000204653	ASPDH	554235	1.37209	NA	3.82102	NA	0.490179	NA	1.27843	NA	3.87971	NA	0.451576	NA	0.0936535	NA	-0.0586843	NA	0.0386031	NA	ENSG00000204653
ENSG00000166183	ASPG	374569	1.62725	0.296115	-0.313064	0.886317	0.087069	0.989443	-0.0659582	NA	-2.15283	NA	0.539956	0.999548	1.69321	0.0566921	1.83977	0.0427526	-0.452887	0.858247	ENSG00000166183
ENSG00000198363	ASPH	444	0.385682	0.112944	-0.108481	0.703166	0.219552	0.722314	0.223341	0.643795	0.0384383	0.959942	-0.139916	0.999548	0.162341	0.468639	-0.14692	0.546662	0.359468	0.241505	ENSG00000198363
ENSG00000174939	ASPHD1	253982	0.27605	0.205778	0.499093	0.0131171	0.468933	0.157624	0.448721	0.174129	0.47286	0.174913	0.222608	0.999548	-0.172672	0.365469	0.0262333	0.913903	0.246325	0.399502	ENSG00000174939
ENSG00000128203	ASPHD2	57168	1.37222	NA	1.56656	NA	0.497363	NA	0.63324	NA	0.568156	NA	2.54825	NA	0.738985	NA	0.998406	NA	-2.05089	NA	ENSG00000128203
ENSG00000066279	ASPM	259266	-0.0156119	0.969858	0.101722	0.774458	-0.194262	0.823121	0.1641	0.801664	0.387586	0.497038	-0.223333	0.999548	-0.179712	0.516302	-0.285863	0.303411	0.0290714	0.970251	ENSG00000066279
ENSG00000106819	ASPN	54829	1.37212	NA	0.691046	NA	2.63811	NA	1.27851	NA	0.749817	NA	1.87819	NA	0.0936157	NA	-0.058771	NA	0.759924	NA	ENSG00000106819
ENSG00000244617	ASPRV1	151516	2.33402	0.342906	2.5018	NA	0.490296	NA	2.05967	NA	2.12404	NA	0.922867	0.999548	0.274342	0.83762	0.377759	0.786392	-0.432571	NA	ENSG00000244617
ENSG00000169696	ASPSCR1	79058	0.128335	0.507869	0.305651	0.0688891	0.249789	0.46149	0.41299	0.110217	0.396175	0.150063	0.30459	0.999548	-0.284655	0.040395	-0.0905239	0.594807	-0.0548011	0.876547	ENSG00000169696
ENSG00000162174	ASRGL1	80150	-0.842339	5.54204e-05	-1.2996	1.03911e-10	-0.155879	0.783949	-0.188929	0.681174	-0.609091	0.0835713	0.219544	0.999548	-0.65341	0.000228922	-0.690507	0.000129796	-0.375424	0.161058	ENSG00000162174
ENSG00000130707	ASS1	445	-0.453194	0.0580229	-0.248235	0.335315	-0.297531	0.571344	0.350699	0.409608	0.321021	0.492346	0.0903305	0.999548	-0.803894	2.45937e-05	-0.569256	0.00490178	-0.387861	0.195692	ENSG00000130707
ENSG00000034533	ASTE1	28990	0.109956	0.67449	-0.0475429	0.858906	-0.065371	0.939291	-0.0415764	0.942189	-0.228639	0.605062	-0.249479	0.999548	0.151532	0.446251	0.181096	0.38033	0.184108	0.58812	ENSG00000034533
ENSG00000188886	ASTL	431705	2.44936	0.262822	2.02244	NA	1.57725	NA	-0.390894	NA	-2.08402	NA	-0.892291	NA	2.84025	NA	4.10646	NA	2.46954	NA	ENSG00000188886
ENSG00000152092	ASTN1	460	-0.489646	NA	-1.17072	NA	1.65234	NA	-0.583165	NA	-1.11186	NA	1.61383	NA	0.0935194	NA	-0.0588663	NA	0.0385102	NA	ENSG00000152092
ENSG00000148219	ASTN2	23245	-1.38436	0.0043626	-1.26729	0.00485983	-0.0863998	0.962391	-0.772015	0.346648	-0.947121	0.219778	-0.285504	0.999548	-0.61235	0.0978716	-0.320169	0.448278	0.199105	0.813563	ENSG00000148219
ENSG00000171456	ASXL1	171023	0.330909	0.00284598	0.435714	4.95829e-05	0.136751	0.600745	0.239259	0.196384	0.388467	0.0247791	0.178652	0.999548	0.0916499	0.384284	0.0472468	0.702843	-0.0419015	0.863419	ENSG00000171456
ENSG00000143970	ASXL2	55252	0.503425	0.00157088	0.553565	0.000421145	0.254654	0.446997	0.0812893	0.834299	0.161767	0.647271	0.15064	0.999548	0.422136	0.00167552	0.391798	0.00512269	0.104014	0.73302	ENSG00000143970
ENSG00000141431	ASXL3	80816	1.37208	NA	-0.270759	NA	-0.471606	NA	2.70497	NA	0.493214	NA	0.916356	NA	-1.3329	NA	-0.763973	NA	-1.38796	NA	ENSG00000141431
ENSG00000154438	ASZ1	136991	-0.751691	0.148839	-0.443899	0.373208	0.537809	0.568186	0.0615723	0.96368	0.316088	0.781722	0.187374	0.999548	-0.813263	0.0635201	-0.759987	0.0932797	0.350434	0.662189	ENSG00000154438
ENSG00000138138	ATAD1	84896	0.721217	0.000629262	0.707703	0.000847912	0.0519342	0.956133	0.408727	0.27655	0.459039	0.237294	-0.0731963	0.999548	0.31249	0.107478	0.248664	0.240088	0.125131	0.771021	ENSG00000138138
ENSG00000156802	ATAD2	29028	-0.287524	0.229445	-0.184632	0.462129	-0.287674	0.561575	-0.260054	0.552193	-0.0702241	0.914362	-0.119882	0.999548	-0.0274696	0.911844	-0.114408	0.632253	-0.167792	0.666896	ENSG00000156802
ENSG00000119778	ATAD2B	54454	0.177116	0.47032	0.107645	0.673227	0.0150749	0.986452	-0.472325	0.173672	-0.48055	0.193536	-0.272412	0.999548	0.649442	0.000204273	0.588195	0.00119375	0.287486	0.334458	ENSG00000119778
ENSG00000197785	ATAD3A	55210	0.319913	0.142542	0.222978	0.325629	0.173281	0.761326	0.223632	0.591135	0.0882204	0.872287	0.0985166	0.999548	0.0962807	0.639823	0.134757	0.525713	0.074764	0.867392	ENSG00000197785
ENSG00000160072	ATAD3B	83858	0.0723461	0.836608	0.603168	0.0233901	0.239529	0.73857	0.130391	0.8366	0.407994	0.424307	0.184528	0.999548	-0.0580449	0.836069	0.195174	0.462985	0.0550012	0.928319	ENSG00000160072
ENSG00000215915	ATAD3C	219293	-0.357764	0.864033	0.280001	NA	0.262018	NA	-0.994143	NA	-2.56166	NA	-1.16309	0.999548	0.636379	0.774828	2.84166	0.0945405	1.42511	NA	ENSG00000215915
ENSG00000176208	ATAD5	79915	-0.557007	0.0181709	-0.225831	0.38247	-0.049449	0.962355	-0.856866	0.0100694	-0.28852	0.544718	-0.129315	0.999548	0.299859	0.146528	0.0626883	0.815564	0.0798655	0.875511	ENSG00000176208
ENSG00000137343	ATAT1	79969	0.168438	0.427416	-0.235768	0.236097	-0.0725639	0.917999	0.14333	0.725235	0.0557692	0.919546	0.060288	0.999548	0.025108	0.905712	-0.291537	0.0997917	-0.132852	0.704161	ENSG00000137343
ENSG00000167654	ATCAY	85300	0.41047	NA	-0.270605	NA	-0.471422	NA	0.316963	NA	-0.211726	NA	-1.2312	NA	0.0935071	NA	-0.0588796	NA	0.759782	NA	ENSG00000167654
ENSG00000107669	ATE1	11101	-0.303865	0.0553175	-0.182289	0.268202	-0.0298473	0.963042	-0.535132	0.0173723	-0.311978	0.25747	-0.0872203	0.999548	0.231267	0.0927508	0.129689	0.411687	0.057373	0.868272	ENSG00000107669
ENSG00000123268	ATF1	466	-0.191397	0.197897	0.105621	0.498688	0.0464429	0.933308	-0.688011	0.000225496	-0.588487	0.00374577	-0.186669	0.999548	0.496613	1.16389e-05	0.694109	6.36924e-10	0.233112	0.192957	ENSG00000123268
ENSG00000115966	ATF2	1386	-0.46174	0.0316531	-0.781675	0.00011433	-0.106349	0.8768	-0.724223	0.0174344	-1.01343	0.000775484	-0.440127	0.999548	0.262483	0.1593	0.231757	0.24792	0.333777	0.217381	ENSG00000115966
ENSG00000162772	ATF3	467	1.99625	1.53599e-06	1.48441	0.000547827	0.291874	0.836427	0.43669	0.641968	0.041466	0.976754	0.205054	0.999548	1.55956	4.03777e-05	1.44295	0.000233051	0.08682	0.940654	ENSG00000162772
ENSG00000128272	ATF4	468	-0.516208	0.000192718	-0.35618	0.00743323	-0.0654244	0.878617	-1.52782	1.07862e-21	-1.38823	2.46491e-19	-0.704036	0.000672312	1.01162	1.5702e-31	1.03205	4.00798e-33	0.638612	1.59705e-11	ENSG00000128272
ENSG00000169136	ATF5	22809	0.730514	0.0161141	1.05926	0.000238116	0.619145	0.247769	0.133361	0.852938	-0.12585	0.874321	0.212977	0.999548	0.597154	0.0162238	1.18511	7.9397e-07	0.406168	0.311741	ENSG00000169136
ENSG00000118217	ATF6	22926	0.560717	3.92872e-06	0.386483	0.00206673	-0.189476	0.48942	0.523013	0.00329371	0.464531	0.0170791	0.022308	0.999548	0.0377048	0.775987	-0.0780483	0.555994	-0.211784	0.191164	ENSG00000118217
ENSG00000213676	ATF6B	1388	0.0904543	0.697337	0.105474	0.642838	0.0857525	0.896491	0.975197	0.000137127	0.783019	0.00572637	0.278295	0.999548	-0.884742	6.91543e-09	-0.677545	1.84802e-05	-0.192543	0.511944	ENSG00000213676
ENSG00000170653	ATF7	11016	-0.284175	0.221249	-0.428838	0.0431323	-0.34348	0.407346	-0.382288	0.364686	-0.2159	0.683577	-0.345904	0.999548	0.098113	0.716773	-0.212937	0.433172	0.00242401	0.997435	ENSG00000170653
ENSG00000171681	ATF7IP	55729	0.0134777	0.958364	-0.0241124	0.919263	0.0390224	0.961633	0.339635	0.26871	0.248376	0.489487	0.252953	0.999548	-0.326157	0.0369119	-0.272488	0.102731	-0.213931	0.423199	ENSG00000171681
ENSG00000166669	ATF7IP2	80063	1.37217	NA	0.691106	NA	0.490259	NA	1.27858	NA	0.0285857	NA	0.451728	NA	0.0935822	NA	0.66252	NA	0.0385318	NA	ENSG00000166669
ENSG00000152348	ATG10	83734	-0.529454	0.0255924	-0.47937	0.0281636	-0.322209	0.458943	0.0550833	0.925989	-0.175903	0.722956	-0.0307704	0.999548	-0.584537	0.00103447	-0.303466	0.114546	-0.291438	0.308145	ENSG00000152348
ENSG00000123395	ATG101	60673	0.455317	0.00923841	0.436748	0.0127157	0.163492	0.727354	-0.10722	0.787021	-0.448899	0.126268	-0.281406	0.999548	0.562537	8.66938e-05	0.885648	3.70933e-10	0.444898	0.0213947	ENSG00000123395
ENSG00000145782	ATG12	9140	0.127968	0.645603	0.0102189	0.974131	-0.167873	0.804911	0.133314	0.804852	0.159971	0.778699	-0.0722384	0.999548	-0.00534581	0.983888	-0.149752	0.547447	-0.0956341	0.852256	ENSG00000145782
ENSG00000175224	ATG13	9776	-1.122	6.79208e-23	-1.20364	1.12757e-28	-0.403057	0.00717214	-0.883226	9.96042e-09	-0.876787	1.16893e-08	-0.211797	0.999548	-0.23877	0.0121382	-0.326857	0.000593723	-0.19126	0.178852	ENSG00000175224
ENSG00000126775	ATG14	22863	0.252587	0.153063	-0.012091	0.957059	-0.0468982	0.944417	0.417981	0.108343	0.521003	0.0441968	0.221741	0.999548	-0.165394	0.273677	-0.533094	0.000141436	-0.26864	0.208365	ENSG00000126775
ENSG00000085978	ATG16L1	55054	0.129431	0.519397	0.0257759	0.90854	0.0838311	0.880374	-0.0780464	0.849408	-0.311905	0.322425	-0.111544	0.999548	0.207478	0.179507	0.337681	0.0258043	0.195375	0.445782	ENSG00000085978
ENSG00000168010	ATG16L2	89849	-0.97606	0.0336374	-0.552272	0.195651	0.0648896	0.969883	-0.17462	0.863049	0.331786	0.709683	0.325342	0.999548	-0.80144	0.0101533	-0.884058	0.00559702	-0.260452	0.682898	ENSG00000168010
ENSG00000110046	ATG2A	23130	-1.18433	1.81076e-08	-0.677166	0.00200288	-0.168549	0.793747	-0.611212	0.0773348	-0.172763	0.747285	0.331156	0.999548	-0.573115	0.00194859	-0.504403	0.00927517	-0.499705	0.0521561	ENSG00000110046
ENSG00000066739	ATG2B	55102	-1.2379	4.86984e-07	-0.639485	0.0123887	-0.0511751	0.96259	-1.20364	0.000689468	-0.792775	0.0509049	-0.194718	0.999548	-0.0342576	0.90508	0.153289	0.571493	0.143543	0.776467	ENSG00000066739
ENSG00000144848	ATG3	64422	0.200101	0.188009	0.287643	0.0457068	0.137112	0.712334	-0.338863	0.13334	-0.353447	0.139138	-0.10062	0.999548	0.538964	2.79486e-06	0.64109	3.01376e-08	0.237732	0.192374	ENSG00000144848
ENSG00000101844	ATG4A	115201	-0.21265	0.297224	-0.112896	0.583754	-0.351194	0.27283	-0.133666	0.738924	-0.0812993	0.860408	-0.170377	0.999548	-0.0789843	0.666035	-0.0315965	0.880866	-0.180818	0.518573	ENSG00000101844
ENSG00000168397	ATG4B	23192	0.352527	0.0282198	0.330613	0.0393735	-0.0096017	0.988005	0.472329	0.0501272	0.590241	0.0157774	-0.035211	0.999548	-0.119802	0.439831	-0.259628	0.0795579	0.0256093	0.948996	ENSG00000168397
ENSG00000125703	ATG4C	84938	-0.787768	1.80447e-05	-0.881856	6.6956e-07	-0.122609	0.82575	-0.5215	0.0782798	-0.627918	0.0324561	-0.29274	0.999548	-0.266268	0.11298	-0.253938	0.152434	0.170131	0.574633	ENSG00000125703
ENSG00000130734	ATG4D	84971	-0.452044	0.0785463	-0.217674	0.382388	0.0511607	0.955998	-0.446057	0.238983	-0.193235	0.681916	-0.00812914	0.999548	-0.00598707	0.977627	-0.0244386	0.914485	0.0592899	0.888752	ENSG00000130734
ENSG00000057663	ATG5	9474	-0.285986	0.252117	-0.00449858	0.988344	-0.00238959	0.998243	-0.767107	0.0213475	-0.669934	0.0677928	-0.241653	0.999548	0.481121	0.0128833	0.665436	0.000564981	0.239263	0.495599	ENSG00000057663
ENSG00000197548	ATG7	10533	-0.154595	0.318463	-0.248815	0.083644	-0.195143	0.511491	0.213072	0.404459	0.0352491	0.934239	-0.0458163	0.999548	-0.367666	0.00173663	-0.284064	0.0223932	-0.149326	0.488787	ENSG00000197548
ENSG00000198925	ATG9A	79065	0.106933	0.611366	-0.150558	0.447272	0.180845	0.678746	0.296168	0.329069	-0.0100118	0.984716	0.196248	0.999548	-0.189235	0.218383	-0.140546	0.410086	-0.0154036	0.973756	ENSG00000198925
ENSG00000181652	ATG9B	285973	1.37213	NA	1.6528	NA	0.490208	NA	0.601666	NA	2.43285	NA	0.451615	NA	0.770464	NA	-0.780053	NA	0.0385932	NA	ENSG00000181652
ENSG00000138363	ATIC	471	0.137647	0.260165	0.0858732	0.503945	-0.042347	0.926457	0.195868	0.316291	0.201096	0.337019	-0.0158735	0.999548	-0.0582209	0.605446	-0.115223	0.297398	-0.0264734	0.91739	ENSG00000138363
ENSG00000198513	ATL1	51062	1.1328	0.361141	1.1068	0.341961	1.82192	0.349567	1.60541	NA	2.5356	NA	1.92297	0.999548	-0.472606	0.611789	-1.4288	0.122022	-0.101053	0.966903	ENSG00000198513
ENSG00000119787	ATL2	64225	0.506391	0.00426628	0.423156	0.0193607	-0.0844496	0.891344	0.196162	0.596986	0.345722	0.296629	-0.186323	0.999548	0.310229	0.0509368	0.0774332	0.704297	0.101874	0.779826	ENSG00000119787
ENSG00000184743	ATL3	25923	-0.00446779	0.978	0.000218523	0.998915	-0.18834	0.388457	0.0404544	0.882246	-0.170694	0.427397	-0.0172726	0.999548	-0.0449222	0.694978	0.170913	0.0951132	-0.171068	0.249431	ENSG00000184743
ENSG00000149311	ATM	472	0.264803	0.390648	0.0481809	0.891375	-0.0488275	0.968675	0.128029	0.845049	0.0231704	0.978835	-0.0728334	0.999548	0.136774	0.618889	0.0250105	0.94165	0.0240059	0.975914	ENSG00000149311
ENSG00000166454	ATMIN	23300	0.371988	0.0441313	0.372666	0.0364971	0.148763	0.760568	0.18269	0.603234	0.278788	0.386352	0.136221	0.999548	0.189298	0.184387	0.0938784	0.575548	0.0125425	0.977256	ENSG00000166454
ENSG00000111676	ATN1	1822	-0.0735244	0.721848	-0.216365	0.229837	-0.0544122	0.935503	-0.378824	0.157988	0.0723032	0.869947	-0.137413	0.999548	0.3053	0.029477	-0.288668	0.050133	0.0830012	0.804003	ENSG00000111676
ENSG00000172238	ATOH1	474	-1.08477	NA	-1.76585	NA	-0.201439	NA	-1.89961	NA	-2.42831	NA	-2.16482	NA	0.814838	NA	0.662455	NA	1.96338	NA	ENSG00000172238
ENSG00000179774	ATOH7	220202	-0.751658	0.753914	-1.17622	NA	-0.441611	NA	1.3241	NA	0.500368	NA	0.760627	NA	-2.07576	NA	-1.67659	NA	-1.20224	NA	ENSG00000179774
ENSG00000168874	ATOH8	84913	0.500488	0.441133	1.14117	0.0458082	-0.195985	0.933097	-0.182271	0.899734	-0.177271	0.914729	-0.143953	0.999548	0.682759	0.182066	1.31844	0.00714321	-0.052032	0.974347	ENSG00000168874
ENSG00000177556	ATOX1	475	-0.527077	0.0384533	-0.175293	0.544696	-0.0565461	0.958938	-0.21953	0.68176	0.233186	0.681916	0.00438956	0.999548	-0.307547	0.185106	-0.408479	0.0823324	-0.0609357	0.917211	ENSG00000177556
ENSG00000206190	ATP10A	57194	0.410441	NA	1.83061	NA	-0.471451	NA	0.316924	NA	1.16812	NA	-1.23124	NA	0.0935174	NA	0.662489	NA	0.759792	NA	ENSG00000206190
ENSG00000118322	ATP10B	23120	3.1808	NA	1.65272	NA	0.490112	NA	3.80835	NA	2.43268	NA	1.17275	NA	-0.627559	NA	-0.779959	NA	-0.682637	NA	ENSG00000118322
ENSG00000145246	ATP10D	57205	0.140829	0.607027	-0.0812277	0.774281	0.0149325	0.9871	-0.0583759	0.920147	-0.108152	0.848869	-0.101325	0.999548	0.199205	0.324096	0.0269244	0.917569	0.116258	0.788828	ENSG00000145246
ENSG00000068650	ATP11A	23250	0.216537	0.33206	0.21456	0.314674	0.293881	0.464144	-0.0949923	0.836104	0.0734403	0.889039	-0.0953226	0.999548	0.311529	0.0459661	0.14112	0.443571	0.389204	0.0642213	ENSG00000068650
ENSG00000058063	ATP11B	23200	0.0989356	0.714711	-0.311652	0.181257	-0.13188	0.845101	0.0339499	0.95403	-0.133115	0.798512	-0.130638	0.999548	0.0649857	0.762059	-0.178536	0.386298	-0.00124224	0.998421	ENSG00000058063
ENSG00000101974	ATP11C	286410	0.310444	0.217023	0.010492	0.973614	0.122147	0.871791	0.0443605	0.943341	0.0511505	0.943781	0.00603351	0.999548	0.266084	0.199863	-0.0406585	0.881623	0.116113	0.804422	ENSG00000101974
ENSG00000075673	ATP12A	479	1.37212	NA	0.691044	NA	1.43994	NA	1.27848	NA	0.74979	NA	1.40133	NA	0.0936405	NA	-0.058746	NA	0.0386049	NA	ENSG00000075673
ENSG00000105726	ATP13A1	57130	0.877983	3.01166e-05	0.727609	0.000710526	0.336066	0.469109	1.20427	3.61381e-05	0.954187	0.00307535	0.372973	0.999548	-0.326283	0.0863337	-0.226578	0.284213	-0.0369073	0.943011	ENSG00000105726
ENSG00000159363	ATP13A2	23400	0.783323	0.00116363	0.324933	0.223961	0.320964	0.561575	0.614291	0.107935	0.328802	0.501911	0.091822	0.999548	0.169032	0.455001	-0.00386941	0.988813	0.229142	0.535334	ENSG00000159363
ENSG00000133657	ATP13A3	79572	-0.0832964	0.792369	-0.0788398	0.798612	-0.105755	0.905657	-0.608976	0.117359	-0.301509	0.551577	-0.447637	0.999548	0.52568	0.0107132	0.222669	0.358866	0.341882	0.305116	ENSG00000133657
ENSG00000127249	ATP13A4	84239	1.37226	NA	0.691155	NA	0.490308	NA	-1.07479	NA	0.0287081	NA	0.45185	NA	2.44706	NA	0.662447	NA	0.0384583	NA	ENSG00000127249
ENSG00000163399	ATP1A1	476	1.06413	1.66592e-10	0.664775	0.000148808	0.161158	0.747649	0.977728	4.98179e-05	0.503453	0.0914512	0.179311	0.999548	0.0863982	0.63612	0.161322	0.373063	-0.0181524	0.970986	ENSG00000163399
ENSG00000018625	ATP1A2	477	4.27754	NA	1.65288	NA	3.53963	NA	4.90959	NA	2.43732	NA	4.22672	NA	-0.632052	NA	-0.78444	NA	-0.687092	NA	ENSG00000018625
ENSG00000105409	ATP1A3	478	0.410353	NA	1.99492	NA	2.65364	NA	1.8122	NA	2.8278	NA	4.11051	NA	-1.40185	NA	-0.83288	NA	-1.45687	NA	ENSG00000105409
ENSG00000132681	ATP1A4	480	1.37213	NA	1.65282	NA	1.98554	NA	0.557185	NA	1.71157	NA	1.94695	NA	0.814945	NA	-0.0587512	NA	0.0385935	NA	ENSG00000132681
ENSG00000143153	ATP1B1	481	0.750991	0.000100482	0.420513	0.0414716	-0.129708	0.838468	0.605819	0.0456664	0.344009	0.36936	0.135026	0.999548	0.145171	0.455711	0.0765044	0.738657	-0.264734	0.353273	ENSG00000143153
ENSG00000129244	ATP1B2	482	1.37222	NA	1.65291	NA	0.490302	NA	-0.193397	NA	0.990424	NA	-0.269511	NA	1.56562	NA	0.662489	NA	0.759813	NA	ENSG00000129244
ENSG00000069849	ATP1B3	483	0.941041	1.32176e-06	0.775937	0.000104068	-0.0433731	0.962391	0.666194	0.0291701	0.438365	0.234835	0.075789	0.999548	0.274847	0.137742	0.337572	0.0746863	-0.119162	0.768126	ENSG00000069849
ENSG00000101892	ATP1B4	23439	1.37218	NA	0.691091	NA	0.490259	NA	0.557275	NA	0.749896	NA	0.451728	NA	0.814907	NA	-0.0588045	NA	0.0385318	NA	ENSG00000101892
ENSG00000166896	ATP23	91419	-0.569053	0.00960989	-0.520868	0.0137813	-0.080973	0.919842	0.00200923	0.996153	0.198838	0.681916	0.0908966	0.999548	-0.571062	0.00189539	-0.719707	0.000107105	-0.17187	0.642519	ENSG00000166896
ENSG00000196296	ATP2A1	487	-0.142548	0.86341	-1.2531	0.0776684	0.14844	0.947535	0.721719	0.516814	-0.309433	NA	1.16079	0.999548	-0.864268	0.0380823	-0.943667	0.02695	-1.01235	0.0809507	ENSG00000196296
ENSG00000174437	ATP2A2	488	1.20312	5.67671e-10	0.717583	0.000466323	0.275457	0.561575	0.700361	0.0229007	0.361886	0.363594	0.0412135	0.999548	0.502763	0.00444422	0.355697	0.0631156	0.234244	0.463327	ENSG00000174437
ENSG00000074370	ATP2A3	489	-0.43649	0.586586	-0.652557	0.361002	-0.214122	0.931475	0.723987	0.561985	0.424909	0.771736	0.923601	0.999548	-1.16048	0.0138585	-1.07747	0.0271605	-1.13772	0.0853184	ENSG00000074370
ENSG00000070961	ATP2B1	490	1.40162	5.40899e-07	1.7248	5.7973e-10	0.364356	0.602512	0.0148877	0.986374	0.315726	0.621965	-0.30057	0.999548	1.38673	6.62204e-09	1.40908	6.36437e-09	0.664927	0.0545984	ENSG00000070961
ENSG00000157087	ATP2B2	491	0.378167	NA	0.309724	NA	-1.50981	NA	-0.428347	NA	-0.361984	NA	-1.54833	NA	0.806514	NA	0.671708	NA	0.0385258	NA	ENSG00000157087
ENSG00000067842	ATP2B3	492	1.37222	NA	0.691129	NA	-0.471499	NA	0.623036	NA	1.45147	NA	0.191508	NA	0.749183	NA	-0.760345	NA	-0.663008	NA	ENSG00000067842
ENSG00000058668	ATP2B4	493	0.103308	0.75691	0.0571812	0.866993	0.10889	0.914617	0.730103	0.0739264	0.274726	0.633669	0.283666	0.999548	-0.626796	0.00478957	-0.217545	0.417202	-0.174776	0.72341	ENSG00000058668
ENSG00000017260	ATP2C1	27032	0.876586	2.55793e-05	0.658725	0.00218773	0.125881	0.860576	0.459422	0.201699	0.367444	0.374829	-0.196109	0.999548	0.417164	0.0243022	0.29128	0.15261	0.32199	0.267931	ENSG00000017260
ENSG00000064270	ATP2C2	9914	0.410436	NA	0.69115	NA	1.79903	NA	0.316864	NA	-0.53546	NA	1.12906	NA	0.0935728	NA	1.22661	NA	0.669967	NA	ENSG00000064270
ENSG00000105675	ATP4A	495	1.37211	NA	1.65281	NA	1.47544	NA	1.27848	NA	1.71155	NA	1.43684	NA	0.0936351	NA	-0.0587366	NA	0.0386001	NA	ENSG00000105675
ENSG00000186009	ATP4B	496	2.00032	0.374226	2.27159	NA	0.387992	NA	2.62809	NA	0.634034	NA	0.349451	NA	-0.627763	NA	1.63756	NA	0.0385411	NA	ENSG00000186009
ENSG00000152234	ATP5F1A	498	0.292814	0.00215159	0.351083	0.00020736	-0.0385484	0.920099	0.234682	0.132361	0.199867	0.25646	-0.0698707	0.999548	0.0581325	0.548791	0.151216	0.0941091	0.0313223	0.886305	ENSG00000152234
ENSG00000110955	ATP5F1B	506	0.598874	1.09703e-11	0.527822	4.82453e-09	0.101334	0.677603	0.378104	0.00523036	0.33939	0.0228087	0.0690015	0.999548	0.22077	0.00668561	0.188432	0.0287065	0.0323324	0.88069	ENSG00000110955
ENSG00000165629	ATP5F1C	509	-0.00368083	0.978	0.134191	0.159776	-0.185762	0.248541	0.0266892	0.908736	0.188136	0.247168	-0.0659483	0.999548	-0.03037	0.753222	-0.0539449	0.582098	-0.119813	0.358156	ENSG00000165629
ENSG00000099624	ATP5F1D	513	0.00192104	0.996367	0.0916353	0.770572	0.177291	0.813434	0.296517	0.552297	0.507003	0.264636	0.35439	0.999548	-0.294596	0.198285	-0.415367	0.0715446	-0.1771	0.699358	ENSG00000099624
ENSG00000124172	ATP5F1E	514	0.239058	0.663544	0.538893	0.281614	0.234284	0.877497	-0.0151647	0.989662	0.380384	0.722513	0.183019	0.999548	0.254222	0.576245	0.158509	0.761567	0.0512655	0.966685	ENSG00000124172
ENSG00000130770	ATP5IF1	93974	-0.491469	0.00136089	-0.239771	0.151222	0.00203736	0.997517	0.0202466	0.962649	0.112922	0.76825	0.138356	0.999548	-0.511716	9.21887e-05	-0.352693	0.0114116	-0.136319	0.608485	ENSG00000130770
ENSG00000159199	ATP5MC1	516	-0.0615453	0.827596	0.296315	0.202301	0.0398919	0.967442	-0.0110136	0.986374	0.120525	0.822702	0.000846798	0.999548	-0.0505317	0.829658	0.175791	0.426485	0.0390451	0.940654	ENSG00000159199
ENSG00000135390	ATP5MC2	517	0.194994	0.310971	0.319499	0.0772549	0.0644936	0.928566	0.258518	0.418812	0.292735	0.37848	0.090015	0.999548	-0.063524	0.725279	0.0267639	0.899067	-0.0255214	0.955087	ENSG00000135390
ENSG00000154518	ATP5MC3	518	-0.10931	0.600942	-0.150315	0.450673	-0.21192	0.607743	-0.0881664	0.833426	-0.0773437	0.868679	-0.0729645	0.999548	-0.0211434	0.915094	-0.072971	0.711277	-0.138956	0.64954	ENSG00000154518
ENSG00000169020	ATP5ME	521	-0.100168	0.677666	0.238002	0.273161	0.0734907	0.928566	0.102124	0.829838	0.341469	0.363594	0.110436	0.999548	-0.202293	0.270635	-0.103467	0.63216	-0.0369451	0.938787	ENSG00000169020
ENSG00000241468	ATP5MF	9551	0.384219	0.115045	0.591946	0.0106889	0.057967	0.954933	0.272629	0.55447	0.424548	0.324528	0.0372177	0.999548	0.11159	0.635355	0.167398	0.48711	0.0207493	0.975171	ENSG00000241468
ENSG00000248919	ATP5MF-PTCD1	100526740	0.856776	0.437589	1.44486	0.106893	1.12926	0.561252	0.936571	0.599742	1.86008	NA	1.40162	0.999548	-0.0797954	0.921332	-0.415223	0.591435	-0.272357	0.863412	ENSG00000248919
ENSG00000167283	ATP5MG	10632	0.14783	0.529747	-0.0875601	0.723659	-0.129309	0.836402	0.0148755	0.979758	-0.343516	0.36936	-0.184211	0.999548	0.132955	0.505972	0.255956	0.188031	0.0549024	0.906917	ENSG00000167283
ENSG00000249222	ATP5MGL	267020	0.410425	NA	1.57402	NA	1.07389	NA	0.257362	NA	0.637875	NA	1.79632	NA	0.153064	NA	0.936145	NA	-0.722428	NA	ENSG00000249222
ENSG00000156411	ATP5MJ	9556	-0.00329508	0.98994	0.43566	0.00998323	0.00698373	0.992667	-0.0421721	0.925163	0.332318	0.28329	-0.0484562	0.999548	0.038877	0.834765	0.103342	0.571856	0.0554399	0.885095	ENSG00000156411
ENSG00000173915	ATP5MK	84833	-0.549751	0.00285582	-0.320823	0.100766	-0.409727	0.205444	-0.570956	0.0430393	-0.398231	0.2347	-0.48061	0.999548	0.0212049	0.921123	0.0774073	0.715725	0.0708832	0.864031	ENSG00000173915
ENSG00000116459	ATP5PB	515	0.0694565	0.534484	0.341214	0.000204249	-0.0162592	0.970203	-0.00294883	0.99066	0.203901	0.228973	-0.0360881	0.999548	0.0724054	0.431563	0.137312	0.125417	0.0198289	0.930527	ENSG00000116459
ENSG00000167863	ATP5PD	10476	-0.0949887	0.71943	-0.188586	0.440648	-0.0232153	0.980927	-0.0047717	0.992857	-0.0325927	0.964021	0.0443395	0.999548	-0.090217	0.684051	-0.155993	0.486391	-0.0675548	0.889949	ENSG00000167863
ENSG00000154723	ATP5PF	522	-0.525522	0.0255924	-0.256074	0.320079	-0.105393	0.896491	-0.542537	0.148938	-0.25809	0.603743	-0.0614863	0.999548	0.0170147	0.951362	0.00201694	0.993814	-0.0439064	0.937832	ENSG00000154723
ENSG00000241837	ATP5PO	539	0.0602787	0.691887	0.149284	0.271106	-0.0297031	0.955998	0.265457	0.20496	0.163277	0.525007	0.0356144	0.999548	-0.205178	0.0679236	-0.0139923	0.927672	-0.0653175	0.803366	ENSG00000241837
ENSG00000071553	ATP6AP1	537	1.32646	5.18677e-11	1.0325	7.09443e-07	0.323214	0.49202	1.31303	5.57055e-06	0.981028	0.00238742	0.235732	0.999548	0.0134299	0.959353	0.051475	0.842258	0.0874817	0.853149	ENSG00000071553
ENSG00000182220	ATP6AP2	10159	0.844057	4.98203e-05	0.435981	0.052381	0.0484895	0.961425	0.779799	0.0131647	0.480949	0.211967	0.0565842	0.999548	0.0642584	0.780874	-0.0449686	0.862661	-0.0080947	0.989076	ENSG00000182220
ENSG00000033627	ATP6V0A1	535	0.592688	0.000914693	0.396436	0.032869	0.0886023	0.884065	0.960072	9.06459e-05	0.641888	0.02259	0.1026	0.999548	-0.367384	0.0179144	-0.245452	0.150369	-0.0139981	0.978046	ENSG00000033627
ENSG00000185344	ATP6V0A2	23545	1.36626	2.35074e-15	0.957706	6.84156e-08	0.102064	0.868837	0.384909	0.219979	0.244616	0.524532	0.0869322	0.999548	0.981346	4.92878e-11	0.713089	4.75406e-06	0.0151319	0.977256	ENSG00000185344
ENSG00000105929	ATP6V0A4	50617	1.37221	NA	1.57029	NA	0.482423	NA	2.30904	NA	1.87404	NA	1.59531	NA	-0.936833	NA	-0.303753	NA	-1.11289	NA	ENSG00000105929
ENSG00000117410	ATP6V0B	533	0.893683	0.0071088	0.514402	0.149366	0.228301	0.82575	0.407624	0.538198	0.267301	0.739056	0.121458	0.999548	0.486059	0.102391	0.247101	0.477298	0.106843	0.887476	ENSG00000117410
ENSG00000185883	ATP6V0C	527	-0.0393944	0.887707	-0.266534	0.240495	0.127099	0.84702	0.0104321	0.986374	-0.016993	0.980234	0.248652	0.999548	-0.0498265	0.824743	-0.249541	0.216528	-0.121553	0.765776	ENSG00000185883
ENSG00000159720	ATP6V0D1	9114	-0.0168465	0.935181	0.0842977	0.644886	-0.0215689	0.97496	0.381456	0.11839	0.327203	0.230903	0.110901	0.999548	-0.398303	0.0020703	-0.242905	0.0869876	-0.13247	0.608919	ENSG00000159720
ENSG00000147614	ATP6V0D2	245972	1.17276	0.389198	0.793775	0.567298	-1.53293	NA	-0.981473	NA	0.689461	NA	-2.13083	0.999548	2.15423	0.0363949	0.104315	0.949331	0.5979	NA	ENSG00000147614
ENSG00000113732	ATP6V0E1	8992	-0.114311	0.790761	0.0574298	0.89647	-0.104425	0.939414	0.149929	0.853475	0.149332	0.867861	0.0844598	0.999548	-0.264239	0.412823	-0.0919018	0.815368	-0.188885	0.779053	ENSG00000113732
ENSG00000171130	ATP6V0E2	155066	-0.309325	0.559135	-0.187993	0.72866	0.344235	0.77944	0.456177	0.614834	0.437268	0.644321	0.499111	0.999548	-0.765502	0.0396908	-0.625262	0.116603	-0.154875	0.869206	ENSG00000171130
ENSG00000114573	ATP6V1A	523	-0.0359012	0.886628	-0.0245453	0.923164	-0.0723825	0.924684	-0.00988227	0.986158	0.0926774	0.84915	0.0974925	0.999548	-0.026019	0.903932	-0.117223	0.564414	-0.169875	0.593453	ENSG00000114573
ENSG00000116039	ATP6V1B1	525	3.95026	NA	1.65282	NA	0.490194	NA	3.85659	NA	0.99023	NA	0.45161	NA	0.0936714	NA	0.662588	NA	0.0385842	NA	ENSG00000116039
ENSG00000147416	ATP6V1B2	526	0.334581	0.0572505	-0.0338499	0.8778	0.0358127	0.962391	0.120104	0.752147	0.139155	0.733297	-0.0210765	0.999548	0.214477	0.170058	-0.173005	0.312554	0.0568892	0.883222	ENSG00000147416
ENSG00000155097	ATP6V1C1	528	-0.404719	0.00562546	-0.918704	2.46064e-11	-0.278962	0.309123	-0.331939	0.173672	-0.815068	0.000105047	-0.189006	0.999548	-0.0727798	0.634346	-0.103636	0.510359	-0.0899557	0.757999	ENSG00000155097
ENSG00000143882	ATP6V1C2	245973	1.90269	0.136302	0.52731	0.735048	0.246299	NA	1.44606	NA	-0.61726	NA	0.937774	0.999548	0.456628	0.738935	1.14457	0.364401	-0.691475	NA	ENSG00000143882
ENSG00000100554	ATP6V1D	51382	-0.456684	0.0361068	-0.68108	0.00112166	-0.480148	0.187505	-0.570132	0.0873008	-0.73492	0.0279352	-0.193592	0.999548	0.113448	0.600582	0.05384	0.832382	-0.286557	0.345625	ENSG00000100554
ENSG00000131100	ATP6V1E1	529	-0.00855265	0.976458	-0.32922	0.10268	-0.361436	0.322518	0.0978536	0.833158	0.0197493	0.973819	-0.0514412	0.999548	-0.106406	0.58766	-0.348969	0.0491138	-0.309994	0.229768	ENSG00000131100
ENSG00000250565	ATP6V1E2	90423	1.29141	0.430207	-0.569295	0.789365	-2.63495	0.506486	2.55804	NA	-0.344914	NA	-3.463	0.999548	-1.26663	0.238911	-0.224381	0.861555	0.828057	0.646602	ENSG00000250565
ENSG00000128524	ATP6V1F	9296	-0.414684	0.117591	-0.381901	0.151902	-0.0878323	0.931731	0.0164683	0.982064	-0.169071	0.784469	-0.0369166	0.999548	-0.431152	0.0498111	-0.21283	0.403802	-0.0509157	0.932212	ENSG00000128524
ENSG00000272899	ATP6V1FNB	100130705	2.33399	NA	1.65291	NA	0.490282	NA	3.7929	NA	2.34226	NA	0.576195	NA	-1.4589	NA	-0.68935	NA	-0.0859128	NA	ENSG00000272899
ENSG00000136888	ATP6V1G1	9550	0.374874	0.232349	0.0677374	0.855173	0.0612098	0.962355	-0.105402	0.88311	-0.146237	0.843581	-0.0705438	0.999548	0.480276	0.0590277	0.213974	0.47766	0.131754	0.83294	ENSG00000136888
ENSG00000213760	ATP6V1G2	534	0.410364	NA	-0.270712	NA	1.0238	NA	1.03807	NA	0.50938	NA	0.985204	NA	-0.627705	NA	-0.780091	NA	0.0385935	NA	ENSG00000213760
ENSG00000254870	ATP6V1G2-DDX39B	NA	0.101072	0.935164	0.478616	0.609549	-0.209029	0.954933	0.210534	0.919625	1.02567	NA	-0.901454	0.999548	-0.109462	0.872528	-0.547049	0.390112	0.692425	0.426144	ENSG00000254870
ENSG00000151418	ATP6V1G3	127124	-2.27559	NA	-1.99488	NA	-2.18765	NA	-1.04092	NA	-2.63861	NA	-2.92831	NA	-1.23467	NA	0.643733	NA	0.740652	NA	ENSG00000151418
ENSG00000047249	ATP6V1H	51606	-0.238977	0.0826131	-0.326008	0.0133021	-0.0265412	0.96259	0.0898814	0.762023	-0.228826	0.361426	-0.0169435	0.999548	-0.328858	0.00383856	-0.0971818	0.484858	-0.00959768	0.979504	ENSG00000047249
ENSG00000165240	ATP7A	538	-0.0020006	0.994237	-0.114162	0.572318	0.010951	0.987951	0.378475	0.18247	0.47322	0.0973247	0.0669901	0.999548	-0.380475	0.00951926	-0.587382	5.76685e-05	-0.0560391	0.884478	ENSG00000165240
ENSG00000123191	ATP7B	540	-0.805787	0.154837	-0.343229	0.510446	-0.313873	0.811368	0.151264	0.900365	0.279709	0.786868	0.0260094	0.999548	-0.957051	0.00312328	-0.622938	0.0684115	-0.339882	0.574067	ENSG00000123191
ENSG00000124406	ATP8A1	10396	-0.00307037	0.995005	-0.211952	0.538838	0.249499	0.757279	0.153173	0.826656	-0.278462	0.666541	-0.0717738	0.999548	-0.156243	0.578195	0.0665104	0.840222	0.321272	0.442664	ENSG00000124406
ENSG00000132932	ATP8A2	51761	1.37213	NA	1.65284	NA	1.47546	NA	1.27851	NA	0.990276	NA	1.43688	NA	0.0936125	NA	0.662566	NA	0.0385775	NA	ENSG00000132932
ENSG00000081923	ATP8B1	5205	-0.471286	0.394427	-0.798962	0.104862	-0.349365	0.782758	-0.0579627	0.962888	-0.187395	0.877267	-0.148099	0.999548	-0.413323	0.269858	-0.611567	0.10495	-0.201266	0.807742	ENSG00000081923
ENSG00000143515	ATP8B2	57198	-0.39827	0.220996	-0.409241	0.187754	-0.357629	0.587341	-0.185459	0.770703	-0.00589801	0.994331	0.0342569	0.999548	-0.212812	0.39661	-0.403343	0.0984539	-0.391886	0.271071	ENSG00000143515
ENSG00000130270	ATP8B3	148229	-1.24953	0.00200756	-0.914968	0.017266	-0.124099	0.933308	0.124341	0.901467	0.301651	0.732934	0.330349	0.999548	-1.37387	3.82818e-06	-1.21662	6.14735e-05	-0.454448	0.365708	ENSG00000130270
ENSG00000104043	ATP8B4	79895	-0.849845	0.226467	-0.737425	0.22821	-0.261156	0.878492	-0.76032	0.490755	-0.857419	NA	-0.650755	0.999548	-0.0895246	0.856831	0.119994	0.81565	0.389599	0.590012	ENSG00000104043
ENSG00000054793	ATP9A	10079	0.356067	0.160173	-0.138466	0.623273	-0.032937	0.97496	0.711784	0.0413181	0.303316	0.523126	0.404547	0.999548	-0.355717	0.0739804	-0.441782	0.0290572	-0.437484	0.118055	ENSG00000054793
ENSG00000166377	ATP9B	374868	0.142334	0.62848	-0.120695	0.677642	0.0575591	0.955685	0.164402	0.757968	-0.153217	0.791656	0.0157788	0.999548	-0.0220681	0.934863	0.0325221	0.907681	0.0417803	0.940654	ENSG00000166377
ENSG00000123472	ATPAF1	64756	-0.244322	0.0185956	-0.0613171	0.605186	0.000644086	0.99873	0.0832707	0.710424	0.0658833	0.792619	0.00860321	0.999548	-0.327592	0.000164866	-0.1272	0.201966	-0.00795913	0.978453	ENSG00000123472
ENSG00000171953	ATPAF2	91647	-1.08267	5.69933e-14	-0.992379	7.59671e-14	-0.0517522	0.919842	-0.995159	3.0958e-07	-0.826642	2.24926e-05	-0.243012	0.999548	-0.087511	0.520374	-0.165737	0.211336	0.191259	0.305116	ENSG00000171953
ENSG00000150756	ATPSCKMT	134145	-0.0522031	0.867832	-0.150334	0.589348	0.0437179	0.9674	0.291123	0.539214	0.266829	0.599481	-0.0405879	0.999548	-0.343326	0.113746	-0.417163	0.0595461	0.0843058	0.874301	ENSG00000150756
ENSG00000175054	ATR	545	0.204136	0.393423	0.168761	0.486161	-0.0314914	0.97496	0.0567025	0.918057	0.164417	0.747584	-0.0947622	0.999548	0.147433	0.475056	0.00434448	0.98676	0.0632709	0.895673	ENSG00000175054
ENSG00000138085	ATRAID	51374	0.381534	0.0406003	0.269737	0.163744	0.336589	0.333349	0.877096	0.000365324	0.69743	0.0114103	0.245176	0.999548	-0.495562	0.000953476	-0.427693	0.00651617	0.0914128	0.804292	ENSG00000138085
ENSG00000164053	ATRIP	84126	-0.113724	0.616577	0.129392	0.550379	-0.0747171	0.9184	0.161345	0.686812	0.290855	0.422466	-0.0215198	0.999548	-0.275069	0.0930905	-0.161464	0.385597	-0.0531973	0.898831	ENSG00000164053
ENSG00000088812	ATRN	8455	1.42319	4.63899e-12	0.709792	0.00127533	0.387657	0.393487	1.3451	3.3195e-06	0.671605	0.0574556	0.209534	0.999548	0.0780844	0.725279	0.0381871	0.881143	0.178124	0.624578	ENSG00000088812
ENSG00000107518	ATRNL1	26033	2.22174	NA	-0.270647	NA	0.511321	NA	2.84949	NA	-0.941083	NA	-0.839613	NA	-0.627755	NA	0.670436	NA	1.35093	NA	ENSG00000107518
ENSG00000085224	ATRX	546	-0.533818	0.0365287	-0.318316	0.241303	-0.243647	0.714197	-1.02882	0.00332319	-0.599796	0.166139	-0.290363	0.999548	0.495	0.0214029	0.28148	0.247624	0.0467157	0.938775	ENSG00000085224
ENSG00000124788	ATXN1	6310	0.275072	0.538657	0.772145	0.0357038	0.0530903	0.97496	0.491279	0.492358	0.178775	0.843725	-0.262988	0.999548	-0.216207	0.541039	0.59337	0.0614798	0.316078	0.583889	ENSG00000124788
ENSG00000130638	ATXN10	25814	0.0889876	0.625035	-0.502617	0.000735239	0.0848508	0.863798	-0.128919	0.689913	-0.117081	0.752629	-0.022846	0.999548	0.217906	0.109109	-0.385536	0.00384005	0.107697	0.699358	ENSG00000130638
ENSG00000224470	ATXN1L	342371	0.277119	0.215446	0.300384	0.159556	-0.484645	0.155439	-0.445341	0.173672	0.0629607	0.914362	-0.303301	0.999548	0.72246	3.63814e-06	0.237423	0.197384	-0.181345	0.562781	ENSG00000224470
ENSG00000204842	ATXN2	6311	-0.227007	0.207364	0.00269513	0.990286	-0.119801	0.806253	-0.430536	0.097241	-0.0936435	0.817955	-0.151412	0.999548	0.20353	0.171563	0.0963386	0.583793	0.0316115	0.936158	ENSG00000204842
ENSG00000168488	ATXN2L	11273	0.513591	0.00152823	0.474465	0.00389413	0.11259	0.82575	-0.024831	0.956466	0.236715	0.477632	0.0828214	0.999548	0.538422	8.11911e-05	0.23775	0.126152	0.0297689	0.940654	ENSG00000168488
ENSG00000066427	ATXN3	4287	-0.853368	1.5492e-05	-0.458855	0.0217869	-0.365303	0.328252	-0.659713	0.0344505	-0.0489314	0.938696	-0.106142	0.999548	-0.193655	0.331062	-0.409924	0.0319382	-0.259161	0.403539	ENSG00000066427
ENSG00000123594	ATXN3L	92552	1.37214	NA	1.65283	NA	1.47546	NA	0.557204	NA	1.71159	NA	1.43688	NA	0.814938	NA	-0.0587591	NA	0.0385775	NA	ENSG00000123594
ENSG00000163635	ATXN7	6314	0.127402	0.603106	0.382215	0.0618462	0.090295	0.896051	-0.229854	0.569238	-0.0135561	0.982634	0.0485624	0.999548	0.357256	0.0346145	0.395771	0.0223625	0.0417325	0.928522	ENSG00000163635
ENSG00000146776	ATXN7L1	222255	-0.196639	0.534622	0.362642	0.168342	0.0947081	0.925278	-0.113337	0.859042	0.564195	0.198542	0.305924	0.999548	-0.083302	0.755037	-0.201553	0.438247	-0.211216	0.625934	ENSG00000146776
ENSG00000162650	ATXN7L2	127002	0.69353	0.00604675	0.71948	0.00364515	0.255971	0.694968	0.284501	0.575411	0.302067	0.55876	0.06548	0.999548	0.409029	0.0572749	0.417413	0.0620877	0.190491	0.662079	ENSG00000162650
ENSG00000087152	ATXN7L3	56970	-0.137668	0.547714	0.0513193	0.818435	-0.330937	0.339592	-0.513255	0.051911	-0.0553911	0.90787	-0.59129	0.291863	0.375588	0.00183588	0.10671	0.47623	0.260353	0.153018	ENSG00000087152
ENSG00000253719	ATXN7L3B	552889	-1.02807	7.38892e-10	-0.853027	3.0047e-07	0.192912	0.652595	-0.223547	0.543115	-0.418544	0.187167	-0.143234	0.999548	-0.804525	2.5532e-07	-0.434483	0.00830658	0.336146	0.145474	ENSG00000253719
ENSG00000148090	AUH	549	0.702477	0.000281208	0.579484	0.00297183	0.206587	0.684725	0.324404	0.382073	0.191338	0.677623	0.172934	0.999548	0.378073	0.0403657	0.388147	0.0411133	0.0336522	0.950454	ENSG00000148090
ENSG00000127423	AUNIP	79000	0.104181	0.602392	0.365019	0.0253729	0.079341	0.881524	-0.291769	0.321616	0.222548	0.508165	0.114496	0.999548	0.39595	0.00569117	0.142471	0.410273	-0.035155	0.931678	ENSG00000127423
ENSG00000115307	AUP1	550	0.773106	0.000142238	0.735039	0.000357711	0.219044	0.687129	0.184645	0.679426	0.124308	0.810766	0.117492	0.999548	0.58846	0.000771721	0.610731	0.000679141	0.101552	0.818461	ENSG00000115307
ENSG00000087586	AURKA	6790	0.0588928	0.802942	0.272081	0.163524	0.0761937	0.912498	-0.107114	0.80047	-0.0189904	0.973512	-0.160606	0.999548	0.166007	0.334837	0.291072	0.0846581	0.2368	0.363824	ENSG00000087586
ENSG00000175756	AURKAIP1	54998	-0.0664059	0.780545	0.0735296	0.75387	0.229598	0.5999	-0.246497	0.497401	-0.151982	0.732934	0.110823	0.999548	0.180091	0.302842	0.225512	0.212045	0.118775	0.738996	ENSG00000175756
ENSG00000178999	AURKB	9212	0.0633536	0.793824	0.120525	0.587687	0.0921821	0.881524	0.226919	0.54371	0.157605	0.721065	-0.000324165	0.999591	-0.163566	0.359224	-0.03708	0.869678	0.0925062	0.813563	ENSG00000178999
ENSG00000105146	AURKC	6795	2.06802	0.0692819	1.83926	0.0969929	1.58097	0.485887	0.103898	NA	-0.117826	NA	0.801144	0.999548	1.96412	0.00332635	1.95708	0.00455081	0.779828	0.574286	ENSG00000105146
ENSG00000158321	AUTS2	26053	-0.544365	NA	0.98564	NA	1.17735	NA	-1.64978	NA	0.433073	NA	-0.336679	NA	1.10542	NA	0.552567	NA	1.51402	NA	ENSG00000158321
ENSG00000169857	AVEN	57099	0.587801	0.00490306	0.600629	0.00351746	0.257377	0.595544	-0.0793609	0.878224	0.103104	0.846423	-0.0611379	0.999548	0.667162	8.14167e-05	0.497525	0.0055847	0.318515	0.246901	ENSG00000169857
ENSG00000135407	AVIL	10677	1.37222	0.612331	0.691137	NA	0.494888	NA	1.70812	NA	1.20032	NA	0.830069	NA	-0.335898	NA	-0.509183	NA	-0.335181	NA	ENSG00000135407
ENSG00000105778	AVL9	23080	-0.156615	0.37247	-0.255204	0.108718	0.0440433	0.943682	-0.644509	0.00288177	-0.409032	0.110137	-0.131101	0.999548	0.487894	0.000124215	0.153828	0.315796	0.175144	0.457246	ENSG00000105778
ENSG00000101200	AVP	551	1.37218	NA	0.691086	NA	1.43998	NA	0.557278	NA	0.749899	NA	0.680111	NA	0.814899	NA	-0.0588122	NA	0.759864	NA	ENSG00000101200
ENSG00000119986	AVPI1	60370	0.641232	2.01884e-05	0.907734	7.44332e-10	0.297003	0.322002	-0.505666	0.0313295	-0.642675	0.00692972	-0.184318	0.999548	1.1469	5.05557e-20	1.55041	2.12496e-36	0.481321	0.00389502	ENSG00000119986
ENSG00000166148	AVPR1A	552	1.37208	NA	0.691001	NA	0.490169	NA	1.99971	NA	1.47102	NA	1.17285	NA	-0.62763	NA	-0.780017	NA	-0.682681	NA	ENSG00000166148
ENSG00000126895	AVPR2	554	-0.631832	0.568414	-2.03659	0.0698055	-1.61446	0.402545	0.332792	0.868977	-0.733081	NA	-0.764609	0.999548	-0.964624	0.0958475	-1.30351	0.0278023	-0.849852	0.353273	ENSG00000126895
ENSG00000147160	AWAT2	158835	1.37213	NA	1.65283	NA	0.490224	NA	1.27851	NA	1.71158	NA	0.451655	NA	0.0936197	NA	-0.058752	NA	0.0385693	NA	ENSG00000147160
ENSG00000162779	AXDND1	126859	0.410432	NA	-0.270653	NA	1.08413	NA	0.178054	NA	-0.213896	NA	1.10732	NA	0.232378	NA	-0.0567571	NA	-0.0231901	NA	ENSG00000162779
ENSG00000103126	AXIN1	8312	0.24237	0.168358	0.131948	0.474063	0.0579005	0.930548	-0.410269	0.101862	-0.269005	0.36936	-0.356826	0.999548	0.652639	1.31771e-07	0.400954	0.0023839	0.414727	0.0129981	ENSG00000103126
ENSG00000168646	AXIN2	8313	-2.01615	0.28408	-0.283001	0.857203	0.297409	NA	-1.15749	NA	1.02246	NA	0.43383	0.999548	-0.858656	0.440901	-1.30546	0.262749	-0.136421	NA	ENSG00000168646
ENSG00000167601	AXL	558	1.55588	3.64928e-14	0.837593	0.000118266	0.0271017	0.978289	0.62193	0.0702332	0.273783	0.55704	0.10817	0.999548	0.933949	2.34216e-07	0.563809	0.00356257	-0.0810686	0.869803	ENSG00000167601
ENSG00000160862	AZGP1	563	2.92735	NA	2.17816	NA	0.563312	NA	2.83375	NA	2.23694	NA	0.524759	NA	0.0936017	NA	-0.0587811	NA	0.0385531	NA	ENSG00000160862
ENSG00000163512	AZI2	64343	-0.54607	0.00301322	0.113293	0.592847	-0.206014	0.640867	-0.461278	0.109995	-0.270063	0.438828	-0.379708	0.999548	-0.0847926	0.634643	0.383356	0.0128072	0.173694	0.529722	ENSG00000163512
ENSG00000155096	AZIN1	51582	1.12219	1.20097e-09	1.18687	1.83042e-10	0.277555	0.522835	-0.0341683	0.949295	0.0313851	0.962634	-0.276983	0.999548	1.15636	2.97774e-13	1.15548	6.55082e-13	0.554539	0.0104879	ENSG00000155096
ENSG00000172232	AZU1	566	1.37219	NA	0.691112	NA	0.490317	NA	1.27864	NA	0.749949	NA	-1.29356	NA	0.0935502	NA	-0.0588365	NA	1.78387	NA	ENSG00000172232
ENSG00000166710	B2M	567	1.56629	1.59439e-10	1.1312	8.84839e-06	0.00505335	0.996422	0.717893	0.0812117	0.620379	0.182603	0.0835767	0.999548	0.8484	0.000111871	0.510825	0.0325534	-0.0785233	0.896458	ENSG00000166710
ENSG00000169255	B3GALNT1	8706	0.140803	0.70177	-0.182048	0.595117	0.0776877	0.945722	-0.342619	0.540605	-0.767412	0.0914822	-0.138242	0.999548	0.483421	0.0308035	0.585364	0.00918632	0.21593	0.628206	ENSG00000169255
ENSG00000162885	B3GALNT2	148789	0.120895	0.704228	0.19818	0.501296	0.244033	0.719463	-0.225484	0.678501	-0.116891	0.861817	-0.0751908	0.999548	0.346378	0.125393	0.315071	0.192855	0.319224	0.379418	ENSG00000162885
ENSG00000172318	B3GALT1	8708	0.477689	NA	1.18526	NA	0.434656	NA	1.08337	NA	1.19349	NA	-0.330659	NA	-0.605679	NA	-0.00822946	NA	0.765315	NA	ENSG00000172318
ENSG00000162630	B3GALT2	8707	2.33391	NA	0.691056	NA	0.490224	NA	2.24027	NA	0.749823	NA	0.451655	NA	0.0936347	NA	-0.058767	NA	0.0385693	NA	ENSG00000162630
ENSG00000235863	B3GALT4	8705	-0.223736	0.922117	0.690792	0.687212	-0.54371	0.933308	1.527	NA	2.18898	NA	0.0650185	0.999548	-1.75073	0.0923766	-1.49819	0.168163	-0.608728	0.780476	ENSG00000235863
ENSG00000176022	B3GALT6	126792	0.366201	0.192844	0.42605	0.112177	0.488505	0.305625	0.954227	0.00925169	0.843855	0.0327898	0.60661	0.999548	-0.588026	0.00525601	-0.417805	0.0651125	-0.118105	0.821196	ENSG00000176022
ENSG00000214654	B3GALT9	100288842	-1.27665	0.00267631	-0.851635	0.0294817	-0.0324351	0.984118	-0.545982	0.508875	-0.436511	0.598795	-0.32289	0.999548	-0.730663	0.0415967	-0.415124	0.288646	0.290455	0.669951	ENSG00000214654
ENSG00000112309	B3GAT2	135152	2.03739	NA	1.35264	NA	0.480853	NA	3.26501	NA	2.0266	NA	1.76351	NA	-1.22762	NA	-0.673967	NA	-1.28266	NA	ENSG00000112309
ENSG00000149541	B3GAT3	26229	0.297714	0.547206	0.452257	0.32781	0.315703	0.795325	0.855431	0.218661	0.804793	0.287436	0.281463	0.999548	-0.557717	0.130127	-0.352536	0.39792	0.0342392	0.977256	ENSG00000149541
ENSG00000187676	B3GLCT	145173	1.17561	0.00151652	1.07914	0.00344067	0.341621	0.744693	0.840993	0.167208	0.710989	0.293085	0.176314	0.999548	0.334614	0.328023	0.368151	0.304561	0.165307	0.832973	ENSG00000187676
ENSG00000170340	B3GNT2	10678	1.00019	4.67964e-05	0.645663	0.0115512	0.157893	0.845889	0.486276	0.259101	0.456471	0.330304	-0.0565399	0.999548	0.513911	0.0143804	0.189192	0.45599	0.214433	0.603339	ENSG00000170340
ENSG00000179913	B3GNT3	10331	-0.503151	0.265405	-0.71876	0.0853421	-0.366991	0.725332	1.37096	0.0187032	0.902783	0.187326	0.792613	0.999548	-1.87411	1.38927e-09	-1.62154	2.10532e-07	-1.1596	0.00280842	ENSG00000179913
ENSG00000176383	B3GNT4	79369	-2.69114	0.212586	-0.86094	NA	0.420792	NA	-1.97419	NA	0.488666	NA	0.64006	0.999548	-0.71695	0.648373	-1.34961	0.403949	-0.219268	NA	ENSG00000176383
ENSG00000176597	B3GNT5	84002	-0.570719	0.204774	-1.01439	0.0140338	-0.173797	0.897555	-0.573925	0.44875	-0.652993	0.399167	-0.517705	0.999548	0.00320599	0.994569	-0.361398	0.35093	0.343909	0.583319	ENSG00000176597
ENSG00000198488	B3GNT6	192134	0.472563	NA	-1.17029	NA	-1.37113	NA	1.10034	NA	-1.11145	NA	-1.40962	NA	-0.627782	NA	-0.0588422	NA	0.0384964	NA	ENSG00000198488
ENSG00000156966	B3GNT7	93010	1.37217	NA	0.691091	NA	0.490274	NA	1.27858	NA	0.749896	NA	-0.269582	NA	0.0935822	NA	-0.0588045	NA	0.759857	NA	ENSG00000156966
ENSG00000177191	B3GNT8	374907	-2.68914	0.140148	-0.15297	0.928665	-0.839787	NA	-1.46152	NA	1.77933	NA	0.40808	0.999548	-1.22761	0.204976	-1.9323	0.0589702	-1.24787	NA	ENSG00000177191
ENSG00000237172	B3GNT9	84752	-0.846967	0.00650765	-0.850466	0.00354574	-0.233142	0.764283	0.109521	0.880799	-0.0536457	0.953635	0.271349	0.999548	-0.956488	1.3317e-05	-0.79682	0.000414128	-0.504491	0.12219	ENSG00000237172
ENSG00000175711	B3GNTL1	146712	-0.804462	0.00885477	-0.655434	0.0259618	-0.169271	0.849179	0.359508	0.552828	0.043295	0.964411	0.0471736	0.999548	-1.16397	1.74959e-06	-0.698729	0.0053971	-0.216445	0.665188	ENSG00000175711
ENSG00000135454	B4GALNT1	2583	-1.51047	1.46079e-06	-1.48891	3.71549e-07	0.00658731	0.995692	0.543387	0.31295	0.19541	0.78613	0.317573	0.999548	-2.05386	1.2059e-21	-1.68432	6.06722e-15	-0.310985	0.425515	ENSG00000135454
ENSG00000167080	B4GALNT2	124872	-1.08526	NA	-1.76632	NA	-1.01705	NA	-0.457422	NA	-2.409	NA	-1.05551	NA	-0.627833	NA	0.64268	NA	0.0384643	NA	ENSG00000167080
ENSG00000139044	B4GALNT3	283358	2.33393	NA	0.691051	NA	1.4693	NA	4.80977	NA	4.04062	NA	1.88648	NA	-2.47584	NA	-3.34957	NA	-0.417187	NA	ENSG00000139044
ENSG00000182272	B4GALNT4	338707	0.602087	0.170227	-0.058678	0.914721	0.0568064	0.97496	0.952535	0.116358	0.7797	0.258082	-0.0638517	0.999548	-0.350448	0.262107	-0.838378	0.00464285	0.120658	0.872067	ENSG00000182272
ENSG00000086062	B4GALT1	2683	1.1667	6.647e-07	0.992209	3.67175e-05	0.130727	0.874859	0.863669	0.0174344	0.636512	0.132929	0.209554	0.999548	0.303026	0.180898	0.355697	0.129232	-0.0788272	0.888647	ENSG00000086062
ENSG00000117411	B4GALT2	8704	1.0369	3.07273e-07	0.962474	1.48346e-06	0.181472	0.763114	0.864369	0.00229949	0.678494	0.030644	-0.00304954	0.999548	0.172536	0.323915	0.283979	0.100568	0.184522	0.531235	ENSG00000117411
ENSG00000158850	B4GALT3	8703	0.280883	0.228344	0.354575	0.103053	0.247408	0.617397	0.253511	0.530277	0.119745	0.808644	0.0870646	0.999548	0.0273719	0.899885	0.23483	0.203414	0.160344	0.624896	ENSG00000158850
ENSG00000121578	B4GALT4	8702	0.748885	0.000831423	0.180976	0.49143	-0.176822	0.793481	0.472586	0.200376	0.193517	0.707708	-0.296327	0.999548	0.276299	0.147473	-0.0125414	0.962979	0.119505	0.779107	ENSG00000121578
ENSG00000158470	B4GALT5	9334	0.465903	0.0327055	0.182847	0.453299	-0.210235	0.710858	0.50642	0.140495	0.345975	0.403683	0.0909908	0.999548	-0.0405164	0.863389	-0.163128	0.457717	-0.301226	0.306321	ENSG00000158470
ENSG00000118276	B4GALT6	9331	-1.07792	0.24955	-0.853419	0.304443	-0.381251	0.868118	-1.39454	0.298038	-0.468012	NA	-1.06546	0.999548	0.316612	0.622404	-0.385407	0.583245	0.684214	0.477659	ENSG00000118276
ENSG00000027847	B4GALT7	11285	0.579501	0.034902	0.686575	0.00825589	0.480492	0.338184	0.896746	0.0174307	0.603493	0.166765	0.372315	0.999548	-0.317245	0.14918	0.0830815	0.763609	0.108177	0.835188	ENSG00000027847
ENSG00000174684	B4GAT1	11041	1.11904	5.13782e-06	0.0665676	0.841764	0.489205	0.319878	1.21859	0.000539487	0.726067	0.0904742	0.448291	0.999548	-0.0995499	0.707199	-0.659499	0.00315113	0.0409139	0.948839	ENSG00000174684
ENSG00000108641	B9D1	27077	-1.35269	1.86342e-06	-1.1608	4.14194e-05	-0.0789939	0.949407	-0.0650837	0.935748	-0.124896	0.876329	0.147906	0.999548	-1.28761	1.00667e-07	-1.03591	3.04562e-05	-0.2269	0.658919	ENSG00000108641
ENSG00000123810	B9D2	80776	-0.191411	0.680036	-0.0912844	0.843439	0.195272	0.865609	-0.1668	0.85642	-0.493974	0.50385	-0.547003	0.999548	-0.024611	0.956749	0.40269	0.26015	0.742275	0.0919032	ENSG00000123810
ENSG00000164929	BAALC	79870	1.37215	NA	1.65285	NA	0.490254	NA	1.27855	NA	1.71162	NA	-0.269617	NA	0.0935972	NA	-0.0587745	NA	0.759872	NA	ENSG00000164929
ENSG00000136881	BAAT	570	1.37225	NA	0.691146	NA	-0.471462	NA	-0.177842	NA	0.750004	NA	-0.509926	NA	1.55009	NA	-0.0588575	NA	0.0384638	NA	ENSG00000136881
ENSG00000105393	BABAM1	29086	-0.460331	0.00402772	-0.457301	0.00378654	-0.0559504	0.931475	-0.298428	0.278345	-0.434138	0.0966936	0.0384903	0.999548	-0.161903	0.259846	-0.0231626	0.902109	-0.0944407	0.754002	ENSG00000105393
ENSG00000158019	BABAM2	9577	-0.298618	0.0274646	-0.27246	0.0430906	0.0128197	0.982674	0.0481987	0.884392	-0.0860501	0.791135	0.0028468	0.999548	-0.346817	0.00196574	-0.18641	0.136034	0.00997287	0.978722	ENSG00000158019
ENSG00000186318	BACE1	23621	0.281161	0.395935	0.550393	0.0414716	-0.0328857	0.978289	0.218019	0.698148	0.202226	0.724876	0.0882357	0.999548	0.0631422	0.786286	0.348167	0.077518	-0.121121	0.782827	ENSG00000186318
ENSG00000182240	BACE2	25825	0.473543	0.682363	0.182262	0.876374	0.19833	0.960718	1.00966	NA	0.743545	NA	0.492336	0.999548	-0.53612	0.456176	-0.561282	0.459639	-0.294007	0.852256	ENSG00000182240
ENSG00000156273	BACH1	571	-0.0949169	0.730687	-0.00405631	0.989236	-0.086876	0.919842	-0.354406	0.381498	-0.171912	0.749056	-0.205352	0.999548	0.259489	0.207575	0.167855	0.47225	0.118476	0.796835	ENSG00000156273
ENSG00000112182	BACH2	60468	1.3722	NA	3.21856	NA	2.74836	NA	-0.123477	NA	2.55601	NA	1.98847	NA	1.49568	NA	0.662556	NA	0.759894	NA	ENSG00000112182
ENSG00000002330	BAD	572	0.432182	0.0927811	0.241218	0.379052	0.440331	0.355093	0.31832	0.500974	0.222486	0.686869	0.343094	0.999548	0.113861	0.643365	0.0187316	0.951088	0.0972372	0.852547	ENSG00000002330
ENSG00000107262	BAG1	573	0.0451419	0.883706	0.800106	0.000360874	-0.230132	0.705698	-0.0432528	0.944399	0.209392	0.688557	0.0119926	0.999548	0.0883947	0.709925	0.590714	0.00302182	-0.242124	0.495599	ENSG00000107262
ENSG00000112208	BAG2	9532	-0.11016	0.672168	-0.0125608	0.965794	-0.0101073	0.991327	-0.454494	0.203502	-0.534986	0.146333	-0.203086	0.999548	0.344334	0.070422	0.522426	0.00572737	0.192979	0.591728	ENSG00000112208
ENSG00000151929	BAG3	9531	-0.0470718	0.843916	0.0829026	0.710112	-0.167629	0.731002	0.0199551	0.968741	0.184516	0.641519	0.0766385	0.999548	-0.0670268	0.721565	-0.101613	0.601528	-0.244267	0.336199	ENSG00000151929
ENSG00000156735	BAG4	9530	0.0630957	0.749648	0.605232	3.71426e-05	0.229154	0.484134	-0.213705	0.489693	0.425206	0.10404	0.177918	0.999548	0.276801	0.0526411	0.180026	0.257885	0.0512355	0.890317	ENSG00000156735
ENSG00000166170	BAG5	9529	0.0159709	0.937029	-0.301085	0.0465179	0.12522	0.757527	-0.455769	0.0432797	-0.388387	0.125416	-0.0805039	0.999548	0.47174	0.000186858	0.0873018	0.595878	0.205723	0.339065	ENSG00000166170
ENSG00000204463	BAG6	7917	0.0685014	0.741428	0.0607137	0.773031	0.156218	0.728817	0.157434	0.6524	0.0314578	0.954167	0.204909	0.999548	-0.0889322	0.596278	0.029256	0.883829	-0.0486909	0.897358	ENSG00000204463
ENSG00000266074	BAHCC1	57597	0.219266	0.317548	-0.0526142	0.830355	0.137151	0.808795	0.151037	0.711528	0.272495	0.46776	0.0927852	0.999548	0.0682294	0.711944	-0.325109	0.0450804	0.0443655	0.913269	ENSG00000266074
ENSG00000140320	BAHD1	22893	-0.322095	0.173048	-0.214529	0.37868	-0.289125	0.550118	-0.207285	0.652572	-0.058897	0.929481	0.0941878	0.999548	-0.11481	0.603068	-0.155632	0.494614	-0.383313	0.17313	ENSG00000140320
ENSG00000175866	BAIAP2	10458	-0.00968147	0.974319	-0.201819	0.367066	-0.237773	0.617397	0.438116	0.189993	0.349853	0.358557	-0.0146944	0.999548	-0.447797	0.00951103	-0.551672	0.00161999	-0.223078	0.468691	ENSG00000175866
ENSG00000006453	BAIAP2L1	55971	-0.237245	0.0930435	-0.307041	0.0218936	-0.170063	0.565495	0.110854	0.70157	0.0303588	0.942873	-0.0497691	0.999548	-0.3481	0.00206158	-0.3374	0.00383917	-0.120294	0.584347	ENSG00000006453
ENSG00000128298	BAIAP2L2	80115	2.11077	0.119905	1.38455	NA	0.224049	NA	0.874998	NA	0.428425	NA	-0.124146	0.999548	1.23577	0.394761	0.956129	0.556654	0.348195	NA	ENSG00000128298
ENSG00000007516	BAIAP3	8938	-2.51889	0.204644	-2.25672	NA	-1.36243	NA	-1.24882	NA	-0.499635	NA	-0.478678	0.999548	-1.27007	0.384272	-1.75708	0.260581	-0.883748	NA	ENSG00000007516
ENSG00000030110	BAK1	578	0.17186	0.553567	0.227772	0.38972	0.188708	0.77684	-0.725091	0.03996	-0.628323	0.0997275	-0.249555	0.999548	0.896951	7.37764e-07	0.856095	3.94161e-06	0.438263	0.112508	ENSG00000030110
ENSG00000095739	BAMBI	25805	0.286039	0.230669	0.812564	4.49899e-05	0.192139	0.737749	0.0877537	0.864202	0.138923	0.780175	0.00634974	0.999548	0.198285	0.282385	0.67364	4.77535e-05	0.18579	0.562051	ENSG00000095739
ENSG00000175334	BANF1	8815	0.191898	0.441133	0.153765	0.545885	0.356557	0.425553	0.183952	0.692039	0.0757464	0.905704	0.267592	0.999548	0.00794654	0.974544	0.0780184	0.756197	0.0889651	0.852256	ENSG00000175334
ENSG00000153064	BANK1	55024	-3.42407	0.0298659	-1.8803	0.0804073	-0.526949	0.840694	-1.29241	NA	-1.10476	NA	0.339055	0.999548	-2.13166	0.00561023	-0.775537	0.311109	-0.866004	0.469612	ENSG00000153064
ENSG00000172530	BANP	54971	0.218581	0.419198	0.355658	0.147266	0.264567	0.640534	-0.191046	0.704205	0.0493658	0.946358	0.16006	0.999548	0.409626	0.0400084	0.306292	0.15977	0.104506	0.832973	ENSG00000172530
ENSG00000163930	BAP1	8314	-0.688873	1.76083e-07	-0.284909	0.0398589	-0.0563464	0.910388	-0.813675	6.01408e-06	-0.368264	0.094677	-0.0762796	0.999548	0.124802	0.303779	0.083355	0.543155	0.0199332	0.952427	ENSG00000163930
ENSG00000138376	BARD1	580	-0.447662	0.0375673	-0.264489	0.240832	-0.296852	0.5067	-0.100475	0.844091	-0.113445	0.829834	-0.0683325	0.999548	-0.347187	0.0658462	-0.151045	0.496581	-0.228519	0.489023	ENSG00000138376
ENSG00000125492	BARHL1	56751	1.37207	NA	1.65279	NA	0.490164	NA	1.99971	NA	1.71147	NA	1.17285	NA	-0.627638	NA	-0.0586844	NA	-0.682688	NA	ENSG00000125492
ENSG00000143032	BARHL2	343472	2.33392	NA	0.691071	NA	0.490254	NA	2.24031	NA	0.749861	NA	-0.269617	NA	0.0936122	NA	-0.0587895	NA	0.759872	NA	ENSG00000143032
ENSG00000131668	BARX1	56033	-0.101878	0.772223	-0.629242	0.0252287	0.226712	0.761435	-0.0335587	0.96416	-0.0351731	0.968339	0.303841	0.999548	-0.0683194	0.808601	-0.594069	0.0107878	-0.0771299	0.897021	ENSG00000131668
ENSG00000043039	BARX2	8538	1.37208	NA	0.691001	NA	0.490169	NA	1.99971	NA	1.47102	NA	1.17285	NA	-0.62763	NA	-0.780017	NA	-0.682681	NA	ENSG00000043039
ENSG00000176788	BASP1	10409	-0.293477	0.155045	-0.10596	0.649835	0.0721843	0.928303	0.0848885	0.856466	-0.0279136	0.965675	0.257209	0.999548	-0.378365	0.0233489	-0.0780464	0.721633	-0.185025	0.550139	ENSG00000176788
ENSG00000156127	BATF	10538	2.33391	NA	0.691056	NA	0.490224	NA	2.24027	NA	0.749823	NA	0.451655	NA	0.0936347	NA	-0.058767	NA	0.0385693	NA	ENSG00000156127
ENSG00000168062	BATF2	116071	3.49273	0.000709111	2.40445	0.0271667	-0.843318	0.823959	1.31886	0.552919	0.067375	NA	0.136977	0.999548	2.17387	0.0343626	2.33707	0.0264508	-0.980295	0.71565	ENSG00000168062
ENSG00000123685	BATF3	55509	-0.152997	0.943189	2.06181	0.0790109	0.647187	NA	-3.28789	NA	-1.37616	NA	-1.93384	0.999548	3.13489	0.00944337	3.43797	0.00512269	2.58103	NA	ENSG00000123685
ENSG00000087088	BAX	581	-0.231611	0.217113	-0.142873	0.467323	0.147448	0.757397	-0.0257364	0.956466	-0.0459427	0.930341	0.0484223	0.999548	-0.205875	0.187603	-0.0969307	0.598973	0.0990253	0.767984	ENSG00000087088
ENSG00000198604	BAZ1A	11177	0.70082	0.000532456	0.700713	0.000578604	0.351165	0.407876	-0.176532	0.689716	0.216543	0.632702	0.0865346	0.999548	0.877352	1.88908e-07	0.48417	0.00779417	0.264631	0.37322	ENSG00000198604
ENSG00000009954	BAZ1B	9031	0.337352	0.0291725	0.351612	0.0226432	0.0646914	0.908591	-0.26558	0.319252	-0.0637282	0.878408	-0.0592943	0.999548	0.602932	1.19031e-06	0.41534	0.00156333	0.123986	0.637292	ENSG00000009954
ENSG00000076108	BAZ2A	11176	0.222595	0.189361	0.0815125	0.668698	-0.216015	0.530418	0.213881	0.477329	0.270907	0.363397	0.0116829	0.999548	0.00871337	0.963574	-0.189395	0.210655	-0.227697	0.287868	ENSG00000076108
ENSG00000123636	BAZ2B	29994	0.219664	0.484185	0.131657	0.686501	0.179034	0.827701	-0.0398922	0.956466	0.0754636	0.924317	-0.117392	0.999548	0.259557	0.292699	0.0561936	0.858893	0.296425	0.461592	ENSG00000123636
ENSG00000105327	BBC3	27113	-0.652395	0.153063	-1.02244	0.0160795	-0.546509	0.550118	0.431013	0.632055	-0.517269	0.555832	-0.112282	0.999548	-1.08341	0.00318479	-0.505169	0.213641	-0.434227	0.509456	ENSG00000105327
ENSG00000214413	BBIP1	92482	-0.332413	0.300085	-0.308958	0.326752	0.12861	0.89474	-0.491521	0.339454	-0.415902	0.469871	-0.405104	0.999548	0.159108	0.587962	0.106944	0.748558	0.533714	0.143814	ENSG00000214413
ENSG00000119636	BBOF1	80127	-1.60442	0.0573152	-1.10236	0.126289	-0.395501	0.840694	-0.96434	0.491396	-0.506697	NA	-0.395297	0.999548	-0.640076	0.228311	-0.595661	0.292689	-0.00020348	0.999934	ENSG00000119636
ENSG00000174483	BBS1	582	-0.35928	0.835106	-0.990845	0.513176	-0.53059	NA	1.86275	NA	-1.15614	NA	-0.544416	0.999548	-2.22203	0.213883	0.165295	0.930765	0.0138264	NA	ENSG00000174483
ENSG00000179941	BBS10	79738	-0.687493	0.0152781	-0.691794	0.0136084	-0.300903	0.661898	0.317676	0.580496	0.269633	0.667669	0.247289	0.999548	-1.00517	1.74726e-05	-0.961427	6.06662e-05	-0.548192	0.114289	ENSG00000179941
ENSG00000181004	BBS12	166379	0.237853	0.647692	-0.228352	0.655623	-0.404213	0.721918	0.0683978	0.954828	-0.44449	0.635864	-0.686267	0.999548	0.169455	0.71071	0.216138	0.652307	0.282054	0.733303	ENSG00000181004
ENSG00000125124	BBS2	583	-0.578701	0.00832051	-0.776313	0.000218077	0.0913958	0.903888	-0.253792	0.565233	-0.263032	0.562913	0.142308	0.999548	-0.324909	0.0941611	-0.513281	0.00767274	-0.0509127	0.917641	ENSG00000125124
ENSG00000140463	BBS4	585	-0.52441	0.0339564	-0.822618	0.000412038	-0.0748717	0.937646	0.476388	0.250227	0.448994	0.318319	0.209492	0.999548	-1.0008	5.10103e-07	-1.27161	2.52548e-10	-0.284364	0.419333	ENSG00000140463
ENSG00000163093	BBS5	129880	0.551662	0.549063	0.342322	0.715669	-1.12893	0.543424	0.158458	0.944399	-0.652389	NA	-1.44648	0.999548	0.393204	0.674901	0.994711	0.23837	0.317542	0.875511	ENSG00000163093
ENSG00000138686	BBS7	55212	0.156179	0.426814	-0.0992124	0.625789	0.0308067	0.968053	-0.156679	0.671227	-0.268838	0.430857	-0.0266433	0.999548	0.312858	0.0430571	0.169625	0.338534	0.05745	0.886305	ENSG00000138686
ENSG00000122507	BBS9	27241	-0.824568	0.00506116	-0.892066	0.00127388	-0.391246	0.501908	-0.453518	0.381574	-0.527984	0.30016	-0.30963	0.999548	-0.37105	0.128008	-0.364082	0.155697	-0.0816158	0.893649	ENSG00000122507
ENSG00000114439	BBX	56987	-0.197144	0.502056	-0.272335	0.330353	-0.570056	0.186717	-1.05238	0.00280821	-0.827099	0.0372891	-0.393211	0.999548	0.855241	3.81566e-05	0.554764	0.0126946	-0.176845	0.703995	ENSG00000114439
ENSG00000187244	BCAM	4059	1.06232	0.00723817	-0.0886204	0.866427	0.0824881	0.96259	1.38217	0.0134385	0.877494	0.209916	0.270083	0.999548	-0.319855	0.36169	-0.966115	0.00319615	-0.187595	0.804866	ENSG00000187244
ENSG00000132692	BCAN	63827	2.33384	NA	1.65276	NA	1.47502	NA	2.96146	NA	2.43277	NA	1.43636	NA	-0.627617	NA	-0.780003	NA	0.038663	NA	ENSG00000132692
ENSG00000075790	BCAP29	55973	1.64959	0.00332341	0.765706	0.2266	0.0818039	0.975742	1.62772	0.0327806	0.822714	0.419549	0.0690951	0.999548	0.0218788	0.965905	-0.0570077	0.910942	0.0127087	0.990821	ENSG00000075790
ENSG00000185825	BCAP31	10134	0.629542	0.00118363	0.171457	0.450673	0.276151	0.523451	0.761276	0.00711447	0.348677	0.353929	0.166216	0.999548	-0.131734	0.498244	-0.17722	0.375805	0.109935	0.781055	ENSG00000185825
ENSG00000050820	BCAR1	9564	0.179164	0.437694	0.500434	0.0133393	0.150051	0.80108	0.0935224	0.846524	0.374673	0.313668	0.19764	0.999548	0.0856415	0.677366	0.125762	0.552168	-0.0475884	0.917211	ENSG00000050820
ENSG00000137936	BCAR3	8412	0.376966	0.124047	0.188476	0.478761	0.081864	0.931475	-0.480121	0.214329	-0.162699	0.773822	-0.104121	0.999548	0.857086	6.32217e-06	0.351175	0.103359	0.185985	0.643633	ENSG00000137936
ENSG00000064787	BCAS1	8537	2.33379	NA	0.690986	NA	0.490111	NA	3.74683	NA	0.179242	NA	1.95821	NA	-1.41304	NA	0.511743	NA	-1.4681	NA	ENSG00000064787
ENSG00000116752	BCAS2	10286	0.396562	0.0394567	0.344275	0.0792743	-0.303124	0.432847	0.0863891	0.849589	0.292875	0.433341	-0.104398	0.999548	0.310173	0.0649218	0.0514	0.819528	-0.198726	0.50847	ENSG00000116752
ENSG00000141376	BCAS3	54828	-0.67121	0.0260632	-0.941142	0.00108063	-0.391512	0.536596	-0.073692	0.924719	-0.139783	0.855414	-0.0188074	0.999548	-0.597518	0.017149	-0.801359	0.00149431	-0.372705	0.368596	ENSG00000141376
ENSG00000124243	BCAS4	55653	-0.239051	0.595066	-0.581957	0.141946	-0.0620319	0.970916	-0.0696026	0.945502	-0.074197	0.951657	-0.105951	0.999548	-0.169449	0.665335	-0.50776	0.163835	0.0439192	0.965435	ENSG00000124243
ENSG00000060982	BCAT1	586	-0.0377437	0.819649	-0.0249872	0.878165	0.184213	0.495817	-0.467678	0.0120674	-0.574054	0.00248172	-0.0806105	0.999548	0.429934	8.07723e-05	0.549066	5.03363e-07	0.264823	0.101712	ENSG00000060982
ENSG00000105552	BCAT2	587	-0.406316	0.0694659	0.0641737	0.813167	0.0967769	0.896721	0.495759	0.159243	0.527284	0.153388	0.180384	0.999548	-0.902076	3.45901e-07	-0.46311	0.0155881	-0.0836071	0.859548	ENSG00000105552
ENSG00000107949	BCCIP	56647	0.604881	0.000944829	0.601627	0.00110214	-0.0356	0.966429	0.0611448	0.89826	0.391202	0.248687	-0.0881452	0.999548	0.543737	0.000533914	0.210425	0.252766	0.0525452	0.903758	ENSG00000107949
ENSG00000186666	BCDIN3D	144233	-0.123703	0.651472	-0.0552328	0.842135	0.151247	0.813434	0.533151	0.161374	0.417439	0.321354	0.0723445	0.999548	-0.656854	0.00124554	-0.472672	0.0259121	0.0789024	0.878168	ENSG00000186666
ENSG00000114200	BCHE	590	0.410258	NA	-0.270818	NA	-0.471635	NA	2.35617	NA	1.82749	NA	0.808007	NA	-1.94592	NA	-2.0983	NA	-1.27964	NA	ENSG00000114200
ENSG00000248098	BCKDHA	593	-0.0403501	0.94847	0.171207	0.751863	-0.0216802	0.991116	0.841644	0.268416	0.957185	0.212942	0.208698	0.999548	-0.881994	0.0198171	-0.785979	0.0471416	-0.230378	0.791807	ENSG00000248098
ENSG00000083123	BCKDHB	594	-0.77744	0.000129909	-0.638078	0.00146898	0.0592488	0.943501	0.238479	0.591135	0.307922	0.468271	0.214604	0.999548	-1.01592	2.6383e-08	-0.946001	2.67985e-07	-0.155355	0.690224	ENSG00000083123
ENSG00000103507	BCKDK	10295	-0.592278	2.57565e-05	-0.60011	1.82176e-05	-0.123381	0.759767	-0.471432	0.0294099	-0.513003	0.022623	-0.145498	0.999548	-0.120846	0.377282	-0.0871066	0.570132	0.0221171	0.952263	ENSG00000103507
ENSG00000142867	BCL10	8915	0.2076	0.384085	0.376134	0.0846534	-0.204948	0.713983	-0.159265	0.737114	0.11072	0.839105	0.128382	0.999548	0.366865	0.0590133	0.265414	0.214709	-0.333329	0.277857	ENSG00000142867
ENSG00000119866	BCL11A	53335	0.410268	NA	-0.270808	NA	-0.471625	NA	2.2616	NA	1.73291	NA	0.713435	NA	-1.85133	NA	-2.00372	NA	-1.18506	NA	ENSG00000119866
ENSG00000127152	BCL11B	64919	3.10235	NA	2.74297	NA	0.490294	NA	2.41249	NA	3.5198	NA	-1.03567	NA	0.68986	NA	-0.776835	NA	1.52596	NA	ENSG00000127152
ENSG00000171791	BCL2	596	-0.0358641	0.926736	0.25764	0.390682	-0.101199	0.927562	-0.688603	0.137185	-0.0158693	0.984908	0.0590873	0.999548	0.652739	0.00710146	0.273509	0.346833	-0.160286	0.793984	ENSG00000171791
ENSG00000140379	BCL2A1	597	2.33383	NA	0.690984	NA	0.490128	NA	3.46524	NA	1.27363	NA	2.39793	NA	-1.13141	NA	-0.582647	NA	-1.9078	NA	ENSG00000140379
ENSG00000171552	BCL2L1	598	0.893781	0.000122909	0.641334	0.00790741	0.23302	0.717988	-0.12708	0.824129	-0.380696	0.417484	-0.406238	0.999548	1.02086	1.32305e-07	1.02203	2.10693e-07	0.639258	0.0144603	ENSG00000171552
ENSG00000137875	BCL2L10	10017	1.37218	NA	0.691091	NA	0.490259	NA	0.557275	NA	0.749896	NA	0.451728	NA	0.814907	NA	-0.0588045	NA	0.0385318	NA	ENSG00000137875
ENSG00000153094	BCL2L11	10018	0.0714769	0.841825	0.374858	0.174855	-0.0713109	0.949779	0.158792	0.801713	0.514644	0.288054	-0.0991309	0.999548	-0.0873147	0.763768	-0.139787	0.640449	0.02782	0.970646	ENSG00000153094
ENSG00000126453	BCL2L12	83596	-0.441493	0.00979591	-0.400489	0.0180198	0.00478478	0.994137	-0.46774	0.0718845	-0.639281	0.0118348	-0.107243	0.999548	0.0262463	0.886748	0.238792	0.120378	0.112028	0.713774	ENSG00000126453
ENSG00000099968	BCL2L13	23786	-0.286154	0.042051	-0.00845056	0.96293	0.00265686	0.996422	-0.10852	0.711765	-0.138191	0.634361	0.0595165	0.999548	-0.177635	0.143363	0.12974	0.328993	-0.0568596	0.846037	ENSG00000099968
ENSG00000121380	BCL2L14	79370	1.37218	NA	0.691091	NA	0.490259	NA	0.557275	NA	0.749896	NA	0.451728	NA	0.814907	NA	-0.0588045	NA	0.0385318	NA	ENSG00000121380
ENSG00000188761	BCL2L15	440603	-1.84669	NA	-2.52776	NA	-0.927926	NA	-1.94022	NA	-4.46581	NA	-1.66419	NA	0.0935362	NA	1.93805	NA	0.736268	NA	ENSG00000188761
ENSG00000129473	BCL2L2	599	0.607786	0.291657	0.478905	0.380436	-0.288138	0.866554	0.511068	0.575755	0.190867	0.867043	-0.0322599	0.999548	0.0967178	0.787965	0.288038	0.39297	-0.255878	0.675138	ENSG00000129473
ENSG00000258643	BCL2L2-PABPN1	100529063	4.34175	0.0221822	5.03503	0.00563363	3.01991	NA	4.73491	NA	5.21229	NA	3.42872	0.999548	-0.39316	0.793253	-0.177257	0.9151	-0.408816	NA	ENSG00000258643
ENSG00000069399	BCL3	602	-0.343489	0.116279	0.0223715	0.934027	0.262181	0.559379	-0.200324	0.637745	-0.0975948	0.84915	0.0658235	0.999548	-0.143165	0.456913	0.119966	0.569244	0.196357	0.529722	ENSG00000069399
ENSG00000113916	BCL6	604	-0.841396	0.000885662	-0.368049	0.180185	-0.194038	0.794635	0.0408656	0.954882	-0.00675988	0.993568	0.0422646	0.999548	-0.882262	4.50723e-05	-0.361289	0.140068	-0.236303	0.57874	ENSG00000113916
ENSG00000161940	BCL6B	255877	1.37213	NA	1.6528	NA	0.490208	NA	0.601666	NA	2.43285	NA	0.451615	NA	0.770464	NA	-0.780053	NA	0.0385932	NA	ENSG00000161940
ENSG00000110987	BCL7A	605	0.0644604	0.788527	-0.514869	0.00552693	0.410249	0.150107	-0.0606346	0.900365	-0.363806	0.297764	-0.0167641	0.999548	0.125095	0.509986	-0.151063	0.451851	0.427014	0.0525332	ENSG00000110987
ENSG00000106635	BCL7B	9275	0.615355	0.0391063	0.837908	0.00354574	0.405115	0.521074	0.181605	0.782557	0.280022	0.665288	0.310364	0.999548	0.43375	0.0893358	0.557887	0.0311486	0.0947514	0.88347	ENSG00000106635
ENSG00000099385	BCL7C	9274	-0.543742	0.0703141	-0.633103	0.0300879	0.0823503	0.944826	-0.377827	0.494856	-0.433223	0.439287	0.129428	0.999548	-0.165915	0.551483	-0.19988	0.493955	-0.0470781	0.94523	ENSG00000099385
ENSG00000116128	BCL9	607	-0.977855	6.1168e-05	-0.59345	0.0198905	-0.266644	0.675234	-0.256097	0.626198	-0.0445247	0.957202	-0.132797	0.999548	-0.721758	0.000541806	-0.548925	0.0130102	-0.133847	0.790784	ENSG00000116128
ENSG00000186174	BCL9L	283149	-0.718377	0.00338988	-0.12107	0.687104	-0.13973	0.861047	-0.795968	0.0299991	-0.150104	0.804753	0.114018	0.999548	0.0775908	0.764566	0.0290338	0.921949	-0.253748	0.50847	ENSG00000186174
ENSG00000029363	BCLAF1	9774	0.168542	0.589385	0.140144	0.655925	-0.0826431	0.939291	-0.251331	0.645481	-0.226175	0.708979	-0.083251	0.999548	0.419874	0.0662577	0.366319	0.135182	0.000607831	0.999538	ENSG00000029363
ENSG00000173681	BCLAF3	256643	0.203953	0.581826	0.104475	0.781267	0.309544	0.676103	-0.423914	0.456135	0.0135716	0.987644	0.135661	0.999548	0.627867	0.0109711	0.0909031	0.787902	0.173883	0.761376	ENSG00000173681
ENSG00000135697	BCO1	53630	0.410425	NA	0.691146	NA	1.07363	NA	1.07792	NA	-1.535	NA	2.5175	NA	-0.667493	NA	2.22615	NA	-1.44387	NA	ENSG00000135697
ENSG00000197580	BCO2	83875	0.394356	0.709691	-1.60373	0.109965	0.0833716	0.982432	0.0821577	0.973218	-0.299419	NA	-0.265651	0.999548	0.312198	0.730257	-1.30432	0.146566	0.349022	0.852547	ENSG00000197580
ENSG00000183337	BCOR	54880	0.325662	0.00766588	0.283635	0.0211785	0.0941076	0.786625	-0.420895	0.0177019	-0.0825318	0.78159	-0.186539	0.999548	0.746556	6.49107e-15	0.366167	0.000374285	0.280647	0.0449399	ENSG00000183337
ENSG00000085185	BCORL1	63035	-0.297304	0.3649	-0.596406	0.0447377	0.0245047	0.984566	0.442424	0.409186	0.391233	0.510296	0.231528	0.999548	-0.739728	0.00269786	-0.98764	7.23131e-05	-0.207023	0.696551	ENSG00000085185
ENSG00000186716	BCR	613	-0.39403	0.0358271	-0.163281	0.425193	-0.0432188	0.955998	-0.553119	0.0410665	-0.277799	0.428978	-0.0937534	0.999548	0.159089	0.336512	0.114518	0.536865	0.0505347	0.899736	ENSG00000186716
ENSG00000074582	BCS1L	617	0.0597016	0.822702	0.334331	0.11295	0.156147	0.785174	0.0629411	0.903394	0.222454	0.602156	0.0704423	0.999548	-0.0032395	0.988667	0.111877	0.601354	0.0857042	0.842362	ENSG00000074582
ENSG00000161267	BDH1	622	-1.27377	0.000582128	-1.23217	0.000722254	0.110618	0.94208	-0.117035	0.904559	-0.31426	0.718212	0.0230089	0.999548	-1.15674	0.000203594	-0.917908	0.00472598	0.0876088	0.917211	ENSG00000161267
ENSG00000164039	BDH2	56898	-0.860752	0.000627998	-0.728722	0.00331464	-0.448744	0.352476	-0.178333	0.762491	-0.207711	0.73595	0.036637	0.999548	-0.682419	0.00285545	-0.521011	0.0300673	-0.485381	0.152884	ENSG00000164039
ENSG00000100739	BDKRB1	623	2.97223	NA	0.691126	NA	0.490299	NA	3.59998	NA	0.046968	NA	-1.42612	NA	-0.627743	NA	0.644158	NA	1.91641	NA	ENSG00000100739
ENSG00000168398	BDKRB2	624	4.10215	NA	4.4484	NA	1.46193	NA	2.68382	NA	3.19897	NA	-0.168571	NA	1.41833	NA	1.24943	NA	1.6305	NA	ENSG00000168398
ENSG00000176697	BDNF	627	0.461445	0.17765	0.741965	0.0176402	0.132295	0.909798	-0.329348	0.61316	-0.109865	0.902907	-0.339424	0.999548	0.790793	0.00231969	0.85183	0.00133564	0.471719	0.258976	ENSG00000176697
ENSG00000145734	BDP1	55814	0.512331	0.0428882	-0.0280865	0.93268	-0.132648	0.868473	-0.304019	0.531221	-0.340876	0.494829	-0.410811	0.999548	0.81635	5.76791e-05	0.312789	0.185074	0.278162	0.457768	ENSG00000145734
ENSG00000126581	BECN1	8678	-0.822464	6.32209e-14	-0.818919	6.14967e-15	-0.0936745	0.757279	-0.653909	1.69511e-05	-0.547211	0.000630181	-0.106988	0.999548	-0.168555	0.0740352	-0.271709	0.00352348	0.0133138	0.961564	ENSG00000126581
ENSG00000196289	BECN2	441925	-0.311394	NA	-0.0306992	NA	1.06466	NA	0.188632	NA	2.02375	NA	3.02176	NA	-0.500026	NA	-2.05445	NA	-1.9571	NA	ENSG00000196289
ENSG00000183092	BEGAIN	57596	0.147878	0.708746	-0.265669	0.458567	-0.109708	0.930335	-0.263299	0.6852	0.0809242	0.930485	0.0888062	0.999548	0.411177	0.0968531	-0.346593	0.215433	-0.198515	0.709675	ENSG00000183092
ENSG00000177324	BEND2	139105	1.37213	NA	0.691056	NA	1.43993	NA	1.27851	NA	0.749824	NA	1.40135	NA	0.0936195	NA	-0.0587672	NA	0.0385839	NA	ENSG00000177324
ENSG00000178409	BEND3	57673	0.785291	0.00012103	0.769774	0.000123008	0.597006	0.0525257	-0.26801	0.515889	0.0607833	0.921653	0.0202178	0.999548	1.0533	2.98285e-10	0.708991	6.00407e-05	0.576788	0.0123302	ENSG00000178409
ENSG00000188848	BEND4	389206	0.410406	NA	1.85342	NA	0.478203	NA	0.316851	NA	1.19089	NA	0.439684	NA	0.0935551	NA	0.662527	NA	0.0385195	NA	ENSG00000188848
ENSG00000162373	BEND5	79656	0.410444	NA	-0.270639	NA	0.499732	NA	0.344138	NA	-1.23107	NA	-1.432	NA	0.0663064	NA	0.960427	NA	1.93173	NA	ENSG00000162373
ENSG00000151917	BEND6	221336	-0.722739	0.513609	-0.0358434	0.97223	0.407089	0.853328	-1.04952	0.490755	-0.466116	0.768499	0.279387	0.999548	0.326779	0.511154	0.430273	0.397569	0.127702	0.91283	ENSG00000151917
ENSG00000165626	BEND7	222389	1.37224	NA	1.65295	NA	0.490314	NA	-0.677017	NA	0.053095	NA	-0.172659	NA	2.04926	NA	1.59985	NA	0.662973	NA	ENSG00000165626
ENSG00000167995	BEST1	7439	0.247447	0.920895	-0.981165	NA	-0.573798	NA	1.33534	NA	0.630701	NA	-0.225598	NA	-1.08789	NA	-1.61187	NA	-0.348199	NA	ENSG00000167995
ENSG00000039987	BEST2	54831	1.37224	NA	0.691126	NA	0.490309	NA	-0.381135	NA	0.749982	NA	-0.269496	NA	1.75337	NA	-0.0588563	NA	0.759805	NA	ENSG00000039987
ENSG00000127325	BEST3	144453	-1.17835	0.424934	-0.431736	0.741967	-0.299269	0.943682	-2.80388	NA	-1.49379	NA	-0.754467	0.999548	1.62552	0.0612508	1.06205	0.28367	0.455198	0.841072	ENSG00000127325
ENSG00000142959	BEST4	266675	-2.30764	0.183399	-0.823685	0.533939	-0.72767	NA	-1.42038	NA	-0.157404	NA	-0.393003	0.999548	-0.887267	0.320731	-0.666281	0.486162	-0.334667	NA	ENSG00000142959
ENSG00000105829	BET1	10282	-0.43725	0.0620353	-0.697957	0.00161419	-0.297355	0.550118	-0.941902	0.00331759	-1.11382	0.000742423	-0.313196	0.999548	0.504651	0.0106708	0.415865	0.0476427	0.0158403	0.981393	ENSG00000105829
ENSG00000177951	BET1L	51272	0.172125	0.618913	0.557624	0.0547401	0.496511	0.374044	-0.250278	0.68363	-0.0978204	0.906019	0.239809	0.999548	0.422403	0.09866	0.655444	0.00918774	0.256702	0.593177	ENSG00000177951
ENSG00000133169	BEX1	55859	-0.500295	NA	-1.18137	NA	-1.38219	NA	-0.593731	NA	-1.12242	NA	-2.1419	NA	0.093436	NA	-0.0589506	NA	0.759711	NA	ENSG00000133169
ENSG00000133134	BEX2	84707	1.37201	NA	0.690919	NA	2.2496	NA	2.00566	NA	2.19828	NA	3.6596	NA	-0.63365	NA	-1.50736	NA	-1.41	NA	ENSG00000133134
ENSG00000166681	BEX3	27018	-0.805297	0.0010115	-1.13359	2.27507e-06	-0.284887	0.646616	-0.22273	0.676398	-0.545117	0.224559	-0.0953171	0.999548	-0.582567	0.00639418	-0.588477	0.00789537	-0.18957	0.671873	ENSG00000166681
ENSG00000102409	BEX4	56271	1.37215	NA	1.65285	NA	0.490254	NA	1.27855	NA	1.71162	NA	-0.269617	NA	0.0935972	NA	-0.0587745	NA	0.759872	NA	ENSG00000102409
ENSG00000184515	BEX5	340542	0.410427	NA	-0.270634	NA	1.60751	NA	0.316887	NA	-0.933112	NA	1.56899	NA	0.0935395	NA	0.662478	NA	0.0385216	NA	ENSG00000184515
ENSG00000103429	BFAR	51283	0.320938	0.0258773	0.185867	0.224362	0.0951656	0.826281	-0.127634	0.668064	-0.550528	0.010082	-0.173318	0.999548	0.448573	0.00010716	0.736394	1.01479e-10	0.268484	0.123515	ENSG00000103429
ENSG00000125864	BFSP1	631	-0.255148	0.709269	-0.0231913	0.973332	0.542436	0.639077	0.788057	0.422849	0.0872205	0.956256	0.863415	0.999548	-1.0432	0.0141347	-0.110412	0.837309	-0.320979	0.706898	ENSG00000125864
ENSG00000170819	BFSP2	8419	1.37204	NA	1.65274	NA	1.47536	NA	1.99964	NA	2.43271	NA	2.158	NA	-0.6276	NA	-0.779972	NA	-0.682635	NA	ENSG00000170819
ENSG00000242252	BGLAP	632	4.6324	0.00773896	1.65294	0.496541	0.490301	0.957703	3.6759	NA	0.115935	NA	-0.144478	0.999548	0.956497	0.301971	1.537	0.0846581	0.634779	0.741326	ENSG00000242252
ENSG00000182492	BGN	633	1.37207	NA	0.690993	NA	2.83322	NA	1.99972	NA	1.47103	NA	1.55302	NA	-0.627655	NA	-0.780042	NA	1.28021	NA	ENSG00000182492
ENSG00000180535	BHLHA15	168620	1.33725	0.431318	0.366639	NA	-1.10418	NA	1.27444	NA	0.42533	NA	-1.58981	NA	0.062809	NA	-0.0586906	NA	0.485634	NA	ENSG00000180535
ENSG00000205899	BHLHA9	727857	0.410431	NA	-0.270601	NA	-0.471478	NA	1.03821	NA	-1.8866	NA	0.211349	NA	-0.627779	NA	1.61599	NA	-0.682827	NA	ENSG00000205899
ENSG00000180828	BHLHE22	27319	-0.531116	0.817449	-0.320141	0.878523	0.874989	0.83205	-0.964861	NA	-0.766718	NA	1.16094	0.999548	0.433745	0.607123	0.446576	0.621615	-0.285953	0.883222	ENSG00000180828
ENSG00000125533	BHLHE23	128408	1.3722	NA	0.691106	NA	0.490289	NA	0.557312	NA	0.749933	NA	-0.269545	NA	0.814885	NA	-0.058827	NA	0.759834	NA	ENSG00000125533
ENSG00000134107	BHLHE40	8553	-0.165418	0.37724	-0.0815754	0.685137	0.0577103	0.932086	-0.209162	0.52197	-0.222913	0.510084	-0.0861565	0.999548	0.0437437	0.807153	0.141337	0.404696	0.143867	0.609272	ENSG00000134107
ENSG00000123095	BHLHE41	79365	0.192892	0.905254	-0.142982	0.926757	0.468304	NA	0.953745	NA	0.48607	NA	0.530869	0.999548	-0.760853	0.471109	-0.629051	0.57648	-0.0625651	NA	ENSG00000123095
ENSG00000145692	BHMT	635	1.37213	NA	1.65283	NA	0.490224	NA	1.27851	NA	1.71158	NA	0.451655	NA	0.0936197	NA	-0.058752	NA	0.0385693	NA	ENSG00000145692
ENSG00000132840	BHMT2	23743	1.37208	NA	0.691001	NA	0.490169	NA	1.99971	NA	1.47102	NA	1.17285	NA	-0.62763	NA	-0.780017	NA	-0.682681	NA	ENSG00000132840
ENSG00000122870	BICC1	80114	-0.448482	0.0474073	-0.538697	0.0136802	0.0605211	0.945279	-0.88335	0.00460477	-0.577664	0.118881	-0.349129	0.999548	0.434868	0.0233588	0.0389674	0.884933	0.40965	0.144588	ENSG00000122870
ENSG00000151746	BICD1	636	0.324934	0.177692	0.247426	0.309155	0.148676	0.82575	-0.404431	0.292297	-0.251867	0.586281	-0.151815	0.999548	0.729365	4.38785e-05	0.499293	0.00884237	0.300491	0.325315	ENSG00000151746
ENSG00000185963	BICD2	23299	0.422241	0.0213795	0.463428	0.0102483	-0.483611	0.0866589	0.282272	0.389046	0.356429	0.274094	-0.0799333	0.999548	0.139969	0.415776	0.106999	0.575757	-0.403678	0.0554728	ENSG00000185963
ENSG00000135127	BICDL1	92558	-0.979456	0.00637894	-1.00797	0.00358277	-0.00563335	0.996426	0.359255	0.619244	0.431456	0.54057	0.347058	0.999548	-1.33871	6.55157e-07	-1.43942	1.3462e-07	-0.352692	0.481561	ENSG00000135127
ENSG00000162069	BICDL2	146439	3.00039	NA	2.6838	NA	0.490275	NA	4.96468	NA	2.71687	NA	-0.310363	NA	-1.96429	NA	-0.0330622	NA	0.800637	NA	ENSG00000162069
ENSG00000063169	BICRA	29998	0.30869	0.218526	0.044685	0.879895	0.15074	0.833457	0.490788	0.198019	0.219524	0.668573	0.26211	0.999548	-0.182098	0.404519	-0.174839	0.456393	-0.111369	0.815829	ENSG00000063169
ENSG00000112624	BICRAL	23506	-0.685758	0.000515442	-0.799819	1.35616e-05	-0.419135	0.174037	-0.638063	0.0258142	-0.754769	0.00722738	-0.568888	0.542183	-0.0476952	0.804628	-0.0450505	0.830736	0.149752	0.619534	ENSG00000112624
ENSG00000015475	BID	637	-0.498447	0.0907775	-0.120637	0.729316	0.0972554	0.932322	-0.553972	0.248251	-0.555956	0.276311	-0.0416689	0.999548	0.0555253	0.857879	0.435319	0.0951021	0.138924	0.81328	ENSG00000015475
ENSG00000100290	BIK	638	-0.489551	0.239206	-0.639207	0.0979037	-0.298068	0.76669	0.0955851	0.926965	0.367939	0.680895	0.459382	0.999548	-0.585136	0.114676	-1.00715	0.00703395	-0.75745	0.154154	ENSG00000100290
ENSG00000136717	BIN1	274	-0.420557	0.00176163	-0.310536	0.0237923	-0.166047	0.596635	-0.0273762	0.940296	-0.131285	0.663239	0.0296405	0.999548	-0.393181	0.000458175	-0.179251	0.16068	-0.195688	0.286002	ENSG00000136717
ENSG00000110934	BIN2	51411	-0.66466	NA	0.224138	NA	-1.54657	NA	-0.758108	NA	-0.438272	NA	-1.58497	NA	0.0934477	NA	0.662411	NA	0.0383973	NA	ENSG00000110934
ENSG00000147439	BIN3	55909	-0.000275576	0.999293	0.21108	0.278865	-0.0187214	0.981123	0.143306	0.725385	-0.00362948	0.994577	0.113907	0.999548	-0.143582	0.43306	0.214709	0.232609	-0.132628	0.703922	ENSG00000147439
ENSG00000110330	BIRC2	329	0.693581	0.0366878	0.285171	0.441281	-0.146227	0.897127	-1.06467	0.0261626	-0.749417	0.188336	-0.74512	0.999548	1.75825	1.21772e-11	1.03459	0.000176892	0.598894	0.144588	ENSG00000110330
ENSG00000023445	BIRC3	330	1.15183	0.0137	1.88664	6.21139e-06	0.468363	0.696801	-0.286512	0.767956	0.845444	0.263854	0.017123	0.999548	1.43834	6.62167e-06	1.04119	0.00207777	0.45124	0.450126	ENSG00000023445
ENSG00000089685	BIRC5	332	-0.0710688	0.766232	0.199143	0.343553	0.298336	0.446323	-0.133203	0.75125	-0.0967961	0.840438	0.187142	0.999548	0.0621345	0.755599	0.295939	0.0910823	0.111194	0.763891	ENSG00000089685
ENSG00000115760	BIRC6	57448	0.127076	0.620988	0.306889	0.182848	-0.00627361	0.994137	-0.113496	0.824524	0.166664	0.748983	-0.105992	0.999548	0.240572	0.222865	0.140225	0.536865	0.0997189	0.828665	ENSG00000115760
ENSG00000101197	BIRC7	79444	-1.39084	0.0227408	-1.92256	0.000975865	-1.24552	0.182772	0.610203	0.621472	-0.980214	0.363096	-0.643578	0.999548	-2.00105	3.08285e-05	-0.942341	0.0500697	-0.601937	0.445018	ENSG00000101197
ENSG00000134897	BIVM	54841	-0.806096	0.347559	-0.813024	0.285232	-1.62495	0.222001	-0.731001	0.606106	-0.879223	NA	-1.77967	0.999548	-0.0750954	0.906052	0.0661991	0.921949	0.154722	0.903977	ENSG00000134897
ENSG00000281406	BLACAT1	NA	0.41038	NA	-0.270696	NA	-0.471527	NA	1.03809	NA	0.509396	NA	0.211228	NA	-0.627705	NA	-0.780092	NA	-0.682756	NA	ENSG00000281406
ENSG00000166619	BLCAP	10904	-0.89134	1.15467e-06	-1.06697	1.75208e-09	0.0214905	0.97851	-0.973407	0.000157228	-1.09742	2.39761e-05	-0.122282	0.999548	0.0820664	0.666948	0.0304459	0.89183	0.143773	0.659945	ENSG00000166619
ENSG00000259571	BLID	414899	1.37208	NA	0.691001	NA	0.49019	NA	2.0623	NA	1.53361	NA	0.211306	NA	-0.690227	NA	-0.842614	NA	0.278884	NA	ENSG00000259571
ENSG00000136573	BLK	640	1.37222	NA	0.691173	NA	0.4903	NA	0.557378	NA	-1.22794	NA	0.45183	NA	0.814845	NA	1.91911	NA	0.03847	NA	ENSG00000136573
ENSG00000197299	BLM	641	0.291324	0.138463	0.223533	0.266606	-0.041439	0.960493	0.279421	0.410498	0.423415	0.189824	0.127107	0.999548	0.0119027	0.956992	-0.199882	0.268018	-0.168546	0.577621	ENSG00000197299
ENSG00000108578	BLMH	642	0.162619	0.214208	0.150294	0.249224	0.167392	0.517613	-0.013864	0.968021	0.0275991	0.942882	-0.0222816	0.999548	0.176483	0.109504	0.122694	0.31678	0.189674	0.251977	ENSG00000108578
ENSG00000095585	BLNK	29760	1.37218	NA	0.691101	NA	1.43996	NA	0.557278	NA	0.0285886	NA	1.40142	NA	0.814899	NA	0.662513	NA	0.0385389	NA	ENSG00000095585
ENSG00000135441	BLOC1S1	2647	-0.533163	0.00645506	-0.477618	0.0132093	-0.0822207	0.903602	-0.0356517	0.947504	-0.0959458	0.848724	0.170581	0.999548	-0.497511	0.00375479	-0.381672	0.0349066	-0.252802	0.381631	ENSG00000135441
ENSG00000196072	BLOC1S2	282991	0.311756	0.480584	0.154788	0.745295	0.084432	0.961475	0.307679	0.709383	0.235493	0.803225	0.0705412	0.999548	0.004077	0.99269	-0.0807046	0.86032	0.0138908	0.989076	ENSG00000196072
ENSG00000189114	BLOC1S3	388552	-0.226261	0.591409	-0.149611	0.724583	0.144562	0.907299	0.0394834	0.96863	0.0865002	0.936179	0.315105	0.999548	-0.265744	0.444596	-0.236111	0.529919	-0.170543	0.821373	ENSG00000189114
ENSG00000186222	BLOC1S4	55330	-0.136395	0.607027	-0.198796	0.42539	-0.0373079	0.970709	0.515924	0.154781	0.349296	0.423609	0.274699	0.999548	-0.652319	0.000550241	-0.548092	0.00551546	-0.312007	0.318727	ENSG00000186222
ENSG00000188428	BLOC1S5	63915	-0.0248199	0.9486	-0.184452	0.547357	0.027511	0.980927	-0.325811	0.567174	-0.201913	0.765241	-0.0901166	0.999548	0.300991	0.269636	0.0174616	0.963	0.117628	0.85537	ENSG00000188428
ENSG00000104164	BLOC1S6	26258	-0.229915	0.378432	-0.112639	0.681857	0.0195414	0.984142	-0.255922	0.590767	-0.134116	0.812745	0.0154955	0.999548	0.0260067	0.922622	0.021477	0.941744	0.00404592	0.994741	ENSG00000104164
ENSG00000106605	BLVRA	644	-0.323647	0.0657066	-0.462368	0.0062054	-0.152237	0.7445	0.236344	0.46584	0.168266	0.655127	0.276569	0.999548	-0.559991	7.70569e-05	-0.630634	1.16004e-05	-0.428806	0.0265968	ENSG00000106605
ENSG00000090013	BLVRB	645	-1.33594	9.17771e-08	-0.898493	0.000566869	-0.391814	0.49202	0.302706	0.576017	0.145292	0.828029	0.240979	0.999548	-1.63865	1.87424e-14	-1.04379	2.98972e-06	-0.632793	0.0396743	ENSG00000090013
ENSG00000117475	BLZF1	8548	0.665352	0.04092	0.724583	0.0248248	-0.0443625	0.97496	-0.0179053	0.985498	-0.0494574	0.96381	-0.139958	0.999548	0.683257	0.0135931	0.77404	0.00624849	0.0955953	0.897021	ENSG00000117475
ENSG00000166780	BMERB1	89927	0.113672	0.683404	-0.0956057	0.731022	-0.0337052	0.973979	-0.688838	0.0402603	-0.465613	0.241174	0.132365	0.999548	0.80251	6.79431e-06	0.370008	0.0647244	-0.16607	0.67869	ENSG00000166780
ENSG00000104081	BMF	90427	-2.88003	0.0162816	-1.67094	0.103867	-1.58415	0.423396	-0.368774	NA	-1.11513	NA	0.31763	0.999548	-2.51126	0.0350676	-0.555808	0.632507	-1.90178	0.249179	ENSG00000104081
ENSG00000168487	BMP1	649	0.761295	0.000609958	0.492553	0.033623	0.120719	0.871995	0.863277	0.00677389	0.605968	0.103141	0.113136	0.999548	-0.101982	0.646899	-0.113414	0.633575	0.00758274	0.989964	ENSG00000168487
ENSG00000163217	BMP10	27302	2.33391	NA	0.691056	NA	0.490224	NA	2.24027	NA	0.749823	NA	0.451655	NA	0.0936347	NA	-0.058767	NA	0.0385693	NA	ENSG00000163217
ENSG00000130385	BMP15	9210	2.33391	NA	0.691056	NA	0.490224	NA	2.24027	NA	0.749823	NA	0.451655	NA	0.0936347	NA	-0.058767	NA	0.0385693	NA	ENSG00000130385
ENSG00000125845	BMP2	650	1.49133	0.000519538	1.65074	6.3791e-05	0.498825	0.653861	-0.056389	0.961209	0.131767	0.914751	-0.186119	0.999548	1.54772	1.90012e-06	1.51897	4.67074e-06	0.684945	0.191164	ENSG00000125845
ENSG00000138756	BMP2K	55589	-0.218339	0.383381	0.0395287	0.886853	0.115479	0.868118	-0.874549	0.0045484	-0.371831	0.361661	-0.442407	0.999548	0.65621	0.000235423	0.411359	0.0339658	0.557886	0.0196636	ENSG00000138756
ENSG00000152785	BMP3	651	1.37217	NA	0.691091	NA	0.490274	NA	1.27858	NA	0.749896	NA	-0.269582	NA	0.0935822	NA	-0.0588045	NA	0.759857	NA	ENSG00000152785
ENSG00000125378	BMP4	652	2.33401	NA	2.46177	NA	0.490294	NA	2.3056	NA	1.57331	NA	0.0501002	NA	0.0284093	NA	0.888461	NA	0.440194	NA	ENSG00000125378
ENSG00000112175	BMP5	653	-1.75321	NA	-0.0312353	NA	-0.190147	NA	-2.37224	NA	0.030037	NA	-0.222075	NA	0.619031	NA	-0.0612724	NA	0.031928	NA	ENSG00000112175
ENSG00000153162	BMP6	654	0.405733	0.263056	0.326627	0.369914	0.613719	0.312629	-0.157725	0.840084	0.202721	0.798315	-0.123203	0.999548	0.563458	0.0404921	0.123905	0.73076	0.736922	0.0432275	ENSG00000153162
ENSG00000101144	BMP7	655	0.41038	NA	-0.270696	NA	-0.471527	NA	1.03809	NA	0.509396	NA	0.211228	NA	-0.627705	NA	-0.780092	NA	-0.682756	NA	ENSG00000101144
ENSG00000183682	BMP8A	353500	1.32585	0.561312	-0.224752	0.935556	0.511975	NA	1.07853	NA	-0.901795	NA	-0.357025	0.999548	0.247329	0.855168	0.677043	0.596408	0.869001	NA	ENSG00000183682
ENSG00000116985	BMP8B	656	-0.365367	0.600942	-0.293564	0.655607	0.647552	0.579213	0.10415	0.943847	0.166796	0.914729	0.902961	0.999548	-0.469517	0.309643	-0.46036	0.349798	-0.255409	0.798284	ENSG00000116985
ENSG00000164619	BMPER	168667	1.42968	0.474291	-1.09914	0.63788	-2.57851	NA	0.0312964	NA	-1.9654	NA	-3.36009	0.999548	1.39838	0.389191	0.866261	0.645308	0.781578	NA	ENSG00000164619
ENSG00000107779	BMPR1A	657	-0.0294337	0.957511	0.201551	0.642355	-0.293982	0.779049	-0.521682	0.440975	-0.271924	0.748696	-0.123229	0.999548	0.492248	0.0991107	0.473475	0.13442	-0.170753	0.808546	ENSG00000107779
ENSG00000138696	BMPR1B	658	1.4185	0.00242195	1.15557	0.0147045	0.293603	0.847535	0.896005	0.271024	0.00554771	0.997222	-0.159779	0.999548	0.522493	0.224753	1.15002	0.00418909	0.453381	0.545625	ENSG00000138696
ENSG00000204217	BMPR2	659	-0.183285	0.43166	0.17675	0.418671	-0.19131	0.710666	-0.549368	0.0670526	-0.174387	0.684245	-0.389966	0.999548	0.366084	0.0201322	0.351137	0.0327719	0.198655	0.483789	ENSG00000204217
ENSG00000165733	BMS1	9790	0.729481	0.00011919	0.64367	0.000854226	0.140936	0.811368	-0.169661	0.68639	0.0700142	0.902909	-0.107734	0.999548	0.899142	1.70025e-08	0.573655	0.000665113	0.248671	0.381453	ENSG00000165733
ENSG00000164603	BMT2	154743	0.563219	0.111014	-0.295668	0.443776	-0.357449	0.675284	0.633966	0.301244	-0.0333757	0.976307	0.0490891	0.999548	-0.070747	0.863739	-0.262292	0.502657	-0.406538	0.488967	ENSG00000164603
ENSG00000102010	BMX	660	0.41045	NA	0.691151	NA	-0.471442	NA	0.316928	NA	0.750001	NA	-1.23124	NA	0.0935221	NA	-0.0588495	NA	0.759797	NA	ENSG00000102010
ENSG00000169594	BNC1	646	2.33389	NA	0.691011	NA	0.49018	NA	1.50498	NA	1.47106	NA	1.17289	NA	0.828913	NA	-0.780047	NA	-0.682711	NA	ENSG00000169594
ENSG00000173068	BNC2	54796	-0.0751361	0.902076	0.24187	0.634664	-0.463623	0.677387	-0.554859	0.524386	-0.443601	0.629807	-0.925633	0.999548	0.479723	0.219099	0.685471	0.0763693	0.462009	0.481561	ENSG00000173068
ENSG00000113734	BNIP1	662	0.330559	0.19444	0.459884	0.0549335	0.00690265	0.994054	0.169363	0.750186	0.281292	0.571298	-0.0462473	0.999548	0.161196	0.498867	0.178592	0.477155	0.0531499	0.926685	ENSG00000113734
ENSG00000140299	BNIP2	663	-0.306831	0.133009	-0.437465	0.0249314	-0.0402919	0.962391	-0.588283	0.0429535	-0.565702	0.0725685	-0.184198	0.999548	0.281453	0.103812	0.128237	0.531343	0.143906	0.679815	ENSG00000140299
ENSG00000176171	BNIP3	664	0.0316879	0.922565	-0.147181	0.607673	0.074899	0.939307	0.0826379	0.891965	0.0427089	0.957166	0.13045	0.999548	-0.05095	0.844957	-0.18989	0.440231	-0.0555514	0.918889	ENSG00000176171
ENSG00000104765	BNIP3L	665	-0.866577	1.64863e-05	-0.819943	4.95958e-05	-0.353397	0.402545	-0.0135181	0.982984	0.0536564	0.935949	0.192988	0.999548	-0.853059	3.16309e-06	-0.8736	2.58397e-06	-0.546385	0.0293629	ENSG00000104765
ENSG00000189325	BNIP5	389384	2.33394	NA	0.691071	NA	0.490239	NA	1.519	NA	0.749861	NA	0.451692	NA	0.814937	NA	-0.0587895	NA	0.0385468	NA	ENSG00000189325
ENSG00000163141	BNIPL	149428	1.37223	0.644515	1.65293	NA	1.44635	NA	0.603914	NA	1.51687	NA	0.339012	NA	0.768311	NA	0.136069	NA	1.10733	NA	ENSG00000163141
ENSG00000144857	BOC	91653	0.485727	0.29902	0.506461	0.233402	0.57133	0.4842	0.231332	0.789107	0.0103886	0.992436	0.364824	0.999548	0.254395	0.392821	0.496073	0.0797928	0.206506	0.724172	ENSG00000144857
ENSG00000145919	BOD1	91272	-0.503992	0.0267367	-0.774735	0.000236963	0.230389	0.644515	-0.769554	0.0115206	-1.36019	1.0711e-06	-0.51699	0.999548	0.265563	0.123628	0.585454	0.00032198	0.747379	4.9178e-05	ENSG00000145919
ENSG00000038219	BOD1L1	259282	0.388827	0.0347039	0.343429	0.0667814	-0.00096168	0.99873	-0.0196206	0.969277	0.0413604	0.942873	0.0344589	0.999548	0.408447	0.00831314	0.302068	0.0706572	-0.0354206	0.936158	ENSG00000038219
ENSG00000228075	BOD1L2	284257	-0.874897	NA	-0.594196	NA	-0.771545	NA	-0.968356	NA	-0.535284	NA	-0.809969	NA	0.0934597	NA	-0.058912	NA	0.0384247	NA	ENSG00000228075
ENSG00000176720	BOK	666	-0.0983099	0.877494	0.410549	0.412299	0.544567	0.58964	-0.523693	0.567983	-0.0600593	0.966396	0.372926	0.999548	0.425383	0.276762	0.470608	0.248986	0.17164	0.852256	ENSG00000176720
ENSG00000178096	BOLA1	51027	-1.44118	9.46821e-05	-0.897569	0.014361	0.068901	0.965036	-0.153297	0.87085	-0.150658	0.882784	0.243505	0.999548	-1.28788	4.41406e-05	-0.746911	0.024487	-0.174604	0.821373	ENSG00000178096
ENSG00000183336	BOLA2	552900	1.37215	NA	0.691096	NA	0.490224	NA	1.27853	NA	-0.446607	NA	1.17299	NA	0.0936124	NA	1.1377	NA	-0.682763	NA	ENSG00000183336
ENSG00000169627	BOLA2B	552900	0.0691225	0.951576	-0.17853	0.857909	0.199827	0.951444	0.671508	0.685557	0.462301	NA	0.727661	0.999548	-0.602385	0.397192	-0.640831	0.393473	-0.527834	0.696038	ENSG00000169627
ENSG00000261740	BOLA2-SMG1P6	107282092	-1.06605	0.63674	-0.785335	0.737361	1.37707	NA	-0.605397	NA	-1.2764	NA	1.64401	0.999548	-0.460649	0.666115	0.491065	0.643737	-0.266936	NA	ENSG00000261740
ENSG00000163170	BOLA3	388962	0.533856	0.390501	0.673973	0.262299	0.421283	0.791433	0.118518	0.936236	0.458801	0.722545	0.217253	0.999548	0.415338	0.431751	0.215172	0.729997	0.20403	0.86655	ENSG00000163170
ENSG00000152430	BOLL	66037	1.37213	NA	1.65283	NA	0.490224	NA	1.27851	NA	1.71158	NA	0.451655	NA	0.0936197	NA	-0.058752	NA	0.0385693	NA	ENSG00000152430
ENSG00000261236	BOP1	23246	0.26597	0.190818	0.642331	0.000486989	0.215835	0.642948	0.383724	0.225372	0.327447	0.35967	0.250427	0.999548	-0.117755	0.527179	0.314884	0.0680524	-0.0345919	0.939883	ENSG00000261236
ENSG00000136122	BORA	79866	-0.406389	0.117927	-0.181346	0.517927	-0.146777	0.847535	-0.423693	0.328258	-0.234264	0.667513	-0.24954	0.999548	0.0173043	0.953134	0.0529186	0.857156	0.102763	0.847452	ENSG00000136122
ENSG00000165714	BORCS5	118426	-0.405881	0.107941	-0.282317	0.25117	0.226239	0.686295	-0.514685	0.206292	-0.492756	0.24308	-0.202603	0.999548	0.108804	0.674298	0.210439	0.402518	0.428843	0.172224	ENSG00000165714
ENSG00000196544	BORCS6	54785	-0.257947	0.418122	-0.414186	0.159022	0.218427	0.776831	0.724675	0.096082	0.400374	0.4662	0.198065	0.999548	-0.982622	1.29735e-05	-0.81456	0.00046099	0.0203619	0.978722	ENSG00000196544
ENSG00000254901	BORCS8	729991	-0.100925	0.968773	0.673556	0.703166	-0.983715	0.860576	0.638607	0.843404	1.12322	NA	-0.905384	0.999548	-0.739532	0.0645342	-0.449666	0.303261	-0.0783312	0.940654	ENSG00000254901
ENSG00000064489	BORCS8-MEF2B	NA	0.410455	NA	-0.27062	NA	-0.471452	NA	0.316926	NA	-0.211763	NA	-0.509932	NA	0.0935296	NA	-0.058857	NA	0.0384792	NA	ENSG00000064489
ENSG00000172331	BPGM	669	-0.995122	2.77986e-07	-0.825954	5.45152e-06	-0.337233	0.335122	-0.786259	0.0046098	-0.321513	0.36936	-0.216528	0.999548	-0.208863	0.214468	-0.504441	0.0016137	-0.120705	0.724512	ENSG00000172331
ENSG00000137274	BPHL	670	-0.73456	0.006527	-0.905096	0.000533659	0.0499766	0.965659	0.39949	0.441955	0.349471	0.538435	0.297545	0.999548	-1.13405	1.10953e-06	-1.25457	1.01177e-07	-0.247568	0.583806	ENSG00000137274
ENSG00000101425	BPI	671	1.37212	NA	0.691062	NA	1.43994	NA	1.27848	NA	-0.0289516	NA	2.12266	NA	0.0936382	NA	0.720014	NA	-0.682723	NA	ENSG00000101425
ENSG00000125999	BPIFB1	92747	1.37211	NA	1.65281	NA	1.43991	NA	1.27848	NA	1.71155	NA	1.40131	NA	0.0936345	NA	-0.0587372	NA	0.0385989	NA	ENSG00000125999
ENSG00000078898	BPIFB2	80341	4.44181	NA	0.691012	NA	0.49018	NA	4.34811	NA	0.749746	NA	0.451578	NA	0.0937005	NA	-0.0587341	NA	0.0386022	NA	ENSG00000078898
ENSG00000186190	BPIFB3	359710	1.3722	NA	0.691106	NA	0.490289	NA	0.557312	NA	0.749933	NA	-0.269545	NA	0.814885	NA	-0.058827	NA	0.759834	NA	ENSG00000186190
ENSG00000186191	BPIFB4	149954	1.3721	NA	3.02398	NA	0.490196	NA	1.27846	NA	3.08269	NA	0.451605	NA	0.0936411	NA	-0.0587092	NA	0.0385907	NA	ENSG00000186191
ENSG00000167104	BPIFB6	128859	1.37217	NA	0.691091	NA	0.490274	NA	1.27858	NA	0.749896	NA	-0.269582	NA	0.0935822	NA	-0.0588045	NA	0.759857	NA	ENSG00000167104
ENSG00000162813	BPNT1	10380	-0.363404	0.0151617	-0.100531	0.560463	-0.187835	0.573611	0.12711	0.690586	0.15808	0.623482	-0.0166566	0.999548	-0.490514	9.70283e-05	-0.258611	0.0607199	-0.171178	0.455623	ENSG00000162813
ENSG00000104331	BPNT2	54928	0.394181	0.0138059	0.120002	0.512581	0.210881	0.548813	-0.0735884	0.846201	-0.240592	0.437412	-0.049672	0.999548	0.46777	0.000291212	0.360593	0.00834835	0.260553	0.197729	ENSG00000104331
ENSG00000171634	BPTF	2186	-0.124657	0.587588	-0.309584	0.126369	-0.20127	0.678746	-0.357806	0.279265	-0.219787	0.586884	-0.193859	0.999548	0.233148	0.17715	-0.0897976	0.66799	-0.0074107	0.988534	ENSG00000171634
ENSG00000157764	BRAF	673	0.101266	0.609218	-0.0397388	0.846806	-0.102248	0.838937	0.186925	0.581744	0.154234	0.679085	0.0361266	0.999548	-0.0856595	0.617009	-0.193973	0.23837	-0.138374	0.636781	ENSG00000157764
ENSG00000089234	BRAP	8315	0.361757	0.0128737	0.322837	0.0261841	0.00248931	0.996426	-0.315993	0.185359	-0.26099	0.329913	0.0270961	0.999548	0.67775	6.02567e-09	0.583826	1.09148e-06	-0.0246068	0.94523	ENSG00000089234
ENSG00000106009	BRAT1	221927	-0.231768	0.422501	-0.338818	0.216521	0.0646025	0.954322	0.384359	0.408483	0.310992	0.555975	0.409477	0.999548	-0.616127	0.00385367	-0.64981	0.00312158	-0.344874	0.329094	ENSG00000106009
ENSG00000012048	BRCA1	672	-0.521987	0.0137642	-0.288358	0.202557	-0.14373	0.823247	-0.532225	0.11142	-0.273808	0.525425	0.049321	0.999548	0.0102381	0.967627	-0.0145504	0.95697	-0.193051	0.575111	ENSG00000012048
ENSG00000139618	BRCA2	675	0.201589	0.517635	0.352388	0.215321	-0.162574	0.845124	-0.26811	0.628961	0.21449	0.734497	-0.109024	0.999548	0.469699	0.0440086	0.137898	0.638389	-0.0535494	0.933735	ENSG00000139618
ENSG00000185515	BRCC3	79184	0.229775	0.224671	0.192271	0.312126	-0.134453	0.783926	-0.125276	0.749178	0.13831	0.742924	-0.0464161	0.999548	0.355051	0.0206998	0.053961	0.794236	-0.0880364	0.816321	ENSG00000185515
ENSG00000100425	BRD1	23774	-0.0749515	0.702832	-0.0194723	0.925373	0.133123	0.754366	-0.609387	0.00528702	-0.209071	0.494639	-0.183418	0.999548	0.534436	9.4328e-06	0.189599	0.179506	0.31654	0.0699729	ENSG00000100425
ENSG00000204256	BRD2	6046	0.739199	1.28993e-07	0.593936	3.54412e-05	0.27774	0.332493	-0.0805693	0.818327	0.0696538	0.858429	-0.0710676	0.999548	0.819769	4.00519e-12	0.524282	2.45448e-05	0.348808	0.0403738	ENSG00000204256
ENSG00000169925	BRD3	8019	-0.989374	3.51052e-06	-0.894454	2.99807e-05	0.0677627	0.940872	-0.277542	0.529375	0.00556582	0.993813	0.125139	0.999548	-0.711832	0.000109839	-0.90002	1.24532e-06	-0.0573768	0.909896	ENSG00000169925
ENSG00000235106	BRD3OS	266655	0.0309406	0.969745	0.0266422	0.969197	0.182116	0.925789	0.405204	0.687214	0.443071	0.64153	0.0388697	0.999548	-0.374264	0.20893	-0.416429	0.179053	0.143246	0.833823	ENSG00000235106
ENSG00000141867	BRD4	23476	-0.0466738	0.760636	0.0223978	0.886317	0.00560154	0.991327	-0.562991	0.000682547	-0.27234	0.198077	-0.0789952	0.999548	0.516318	1.05464e-07	0.294737	0.00477093	0.0845968	0.699283	ENSG00000141867
ENSG00000166164	BRD7	29117	-0.310545	0.117157	0.00212362	0.992698	-0.0479694	0.950689	-0.632591	0.0147774	-0.0526002	0.918602	-0.113738	0.999548	0.322045	0.0246006	0.0547238	0.773189	0.0657689	0.85537	ENSG00000166164
ENSG00000112983	BRD8	10902	0.398988	0.0077185	0.158629	0.342855	0.116157	0.787184	0.611357	0.00380206	0.635472	0.00469054	0.0751981	0.999548	-0.212369	0.11298	-0.476843	0.000194666	0.0409585	0.905863	ENSG00000112983
ENSG00000028310	BRD9	65980	0.29469	0.0539621	0.218261	0.162289	0.155161	0.675234	-0.155117	0.606201	-0.0706069	0.849358	-0.134229	0.999548	0.449807	0.000133112	0.288868	0.0230909	0.28939	0.0954683	ENSG00000028310
ENSG00000137948	BRDT	676	-0.400296	NA	-1.08137	NA	-0.332503	NA	-0.493777	NA	-1.02247	NA	-0.370948	NA	0.0934812	NA	-0.0589055	NA	0.0384456	NA	ENSG00000137948
ENSG00000185024	BRF1	2972	0.435089	0.00624467	0.231403	0.170426	0.258731	0.422669	0.18878	0.546306	0.0766685	0.848612	0.0288713	0.999548	0.246309	0.0687828	0.154734	0.309393	0.22986	0.269835	ENSG00000185024
ENSG00000104221	BRF2	55290	0.798843	0.000371898	0.755116	0.000772903	0.273565	0.621433	0.840163	0.0122292	0.619466	0.107301	0.317932	0.999548	-0.04132	0.872894	0.135651	0.583793	-0.0443665	0.936613	ENSG00000104221
ENSG00000164713	BRI3	25798	0.367136	0.583316	0.225514	0.748007	0.264986	0.891344	0.169135	0.9064	0.091288	0.961325	0.306955	0.999548	0.198	0.734812	0.134226	0.839648	-0.0419689	0.978919	ENSG00000164713
ENSG00000184992	BRI3BP	140707	0.29998	0.0338378	0.235102	0.0969838	0.315144	0.157108	0.0329013	0.926466	0.19861	0.454908	0.184567	0.999548	0.267078	0.0173238	0.0364921	0.812156	0.130577	0.52808	ENSG00000184992
ENSG00000182685	BRICD5	283870	3.7793	0.0180642	2.16601	0.250481	2.62976	0.430997	3.16054	0.103988	1.75237	NA	2.43918	0.999548	0.618764	0.101022	0.413642	0.329694	0.190576	0.838283	ENSG00000182685
ENSG00000078725	BRINP1	1620	1.37209	NA	0.691016	NA	0.490199	NA	1.99974	NA	1.47106	NA	0.451577	NA	-0.627653	NA	-0.780039	NA	0.0386218	NA	ENSG00000078725
ENSG00000198797	BRINP2	57795	1.37217	NA	0.691091	NA	0.490274	NA	1.27858	NA	0.749896	NA	-0.269582	NA	0.0935822	NA	-0.0588045	NA	0.759857	NA	ENSG00000198797
ENSG00000162670	BRINP3	339479	0.41038	NA	-0.270696	NA	-0.471527	NA	1.03809	NA	0.509396	NA	0.211228	NA	-0.627705	NA	-0.780092	NA	-0.682756	NA	ENSG00000162670
ENSG00000136492	BRIP1	83990	-0.180032	0.602238	-0.0738197	0.839802	-0.338346	0.622953	-0.00531486	0.993683	0.078318	0.928333	-0.253614	0.999548	-0.174717	0.543575	-0.152138	0.629291	-0.0847327	0.897182	ENSG00000136492
ENSG00000113460	BRIX1	55299	0.568332	0.00216013	0.55039	0.00328402	0.036607	0.965577	-0.197888	0.613081	0.215607	0.591461	-0.178021	0.999548	0.766219	6.82598e-07	0.334784	0.0517678	0.214628	0.455711	ENSG00000113460
ENSG00000254999	BRK1	55845	-0.05565	0.767236	0.291786	0.0544953	-0.0374263	0.954546	0.197427	0.49534	0.332513	0.20269	0.0348735	0.999548	-0.253077	0.053943	-0.0407262	0.815604	-0.0722999	0.818461	ENSG00000254999
ENSG00000132016	BRME1	79173	-1.35226	0.00810565	-1.34708	0.00395128	-0.669454	0.465803	0.167296	0.894352	-0.660173	0.471414	-0.19783	0.999548	-1.51956	0.000113604	-0.686906	0.0897239	-0.471623	0.481561	ENSG00000132016
ENSG00000174744	BRMS1	25855	0.115092	0.522051	0.16489	0.327974	0.0429946	0.945279	0.0823579	0.818431	-0.0732803	0.851144	0.0970023	0.999548	0.0327339	0.841955	0.238171	0.0861025	-0.0540077	0.872067	ENSG00000174744
ENSG00000100916	BRMS1L	84312	-0.179726	0.53215	-0.0200059	0.951899	-0.157766	0.834325	-0.406167	0.353316	-0.167508	0.778699	-0.261248	0.999548	0.226441	0.326368	0.147502	0.573353	0.103483	0.846718	ENSG00000100916
ENSG00000162819	BROX	148362	-0.423151	0.00883858	-0.299995	0.0739106	-0.218511	0.538554	-0.684094	0.00288177	-0.324098	0.276812	-0.130819	0.999548	0.260943	0.0758802	0.0241029	0.90538	-0.0876922	0.797417	ENSG00000162819
ENSG00000156983	BRPF1	7862	0.621837	0.000149911	0.412042	0.0153757	0.183026	0.665559	-0.136664	0.703161	-0.157377	0.674148	-0.202541	0.999548	0.758502	7.98165e-09	0.56942	3.21344e-05	0.385567	0.0396743	ENSG00000156983
ENSG00000096070	BRPF3	27154	-0.15135	0.460492	-0.478379	0.00614616	-0.243928	0.511491	-0.0885434	0.830589	-0.251818	0.460365	-0.0598967	0.999548	-0.0628066	0.711944	-0.226561	0.145404	-0.184032	0.463327	ENSG00000096070
ENSG00000102239	BRS3	680	1.37217	NA	0.691106	NA	0.490259	NA	1.27858	NA	0.0285857	NA	0.451728	NA	0.0935822	NA	0.66252	NA	0.0385318	NA	ENSG00000102239
ENSG00000160469	BRSK1	84446	-0.146757	0.922305	0.580793	0.606723	0.433365	0.894999	1.53476	NA	1.48929	NA	0.820349	0.999548	-1.68152	0.068495	-0.908494	0.328958	-0.386984	0.842284	ENSG00000160469
ENSG00000174672	BRSK2	9024	-2.95825	0.121849	-1.83055	NA	-1.41809	NA	-2.02628	NA	-0.141169	NA	0.015944	0.999548	-0.93197	0.465057	-1.68938	0.208917	-1.43403	NA	ENSG00000174672
ENSG00000185658	BRWD1	54014	0.148546	0.531987	0.0896302	0.718918	-0.0209369	0.98135	-0.113527	0.810313	0.0228462	0.971132	-0.132215	0.999548	0.262072	0.150768	0.0667839	0.772485	0.111278	0.783254	ENSG00000185658
ENSG00000165288	BRWD3	254065	0.0772029	0.777862	-0.265777	0.256365	0.0718294	0.933639	-0.0346592	0.953029	-0.31929	0.449728	-0.0781681	0.999548	0.111862	0.5976	0.0535134	0.829225	0.149997	0.696896	ENSG00000165288
ENSG00000168000	BSCL2	26580	-0.199502	0.432653	-0.349964	0.127525	0.387796	0.342232	0.318241	0.422305	0.296914	0.485044	0.260244	0.999548	-0.517743	0.00243682	-0.646878	0.000184977	0.127552	0.739716	ENSG00000168000
ENSG00000160058	BSDC1	55108	-0.176757	0.392787	-0.456273	0.0109843	-0.00823892	0.991327	0.184124	0.616962	0.118223	0.785203	0.189996	0.999548	-0.360881	0.0136996	-0.574496	7.51792e-05	-0.198235	0.437892	ENSG00000160058
ENSG00000172270	BSG	682	1.36472	1.18073e-12	1.04833	1.19164e-07	0.370649	0.374553	1.11431	7.07773e-05	0.860132	0.00634926	0.358765	0.999548	0.250408	0.188215	0.188201	0.371967	0.0118847	0.985156	ENSG00000172270
ENSG00000164061	BSN	8927	0.583093	0.587443	0.22747	0.83753	0.953285	0.619254	0.907257	0.59474	0.203008	NA	0.74537	0.999548	-0.324163	0.666586	0.0244614	0.979963	0.207915	0.897019	ENSG00000164061
ENSG00000162399	BSND	7809	1.37213	NA	0.691056	NA	1.43993	NA	1.27851	NA	0.749824	NA	1.40135	NA	0.0936195	NA	-0.0587672	NA	0.0385839	NA	ENSG00000162399
ENSG00000188334	BSPH1	100131137	1.37213	NA	1.65283	NA	0.490224	NA	1.27851	NA	1.71158	NA	0.451655	NA	0.0936197	NA	-0.058752	NA	0.0385693	NA	ENSG00000188334
ENSG00000119411	BSPRY	54836	-0.538647	NA	-2.1815	NA	-2.38233	NA	-0.632057	NA	-2.12251	NA	-2.42068	NA	0.0934105	NA	-0.0589912	NA	0.0383451	NA	ENSG00000119411
ENSG00000109743	BST1	683	0.410449	NA	0.691158	NA	0.483818	NA	-0.60885	NA	-0.260048	NA	-1.86527	NA	1.0193	NA	0.951206	NA	2.34909	NA	ENSG00000109743
ENSG00000130303	BST2	684	1.41482	5.66037e-10	1.21901	1.82783e-07	0.156345	0.840694	0.972174	0.00526606	0.726751	0.0708174	0.151643	0.999548	0.442642	0.0392782	0.492259	0.0258808	0.00470136	0.994564	ENSG00000130303
ENSG00000188909	BSX	390259	1.37218	NA	0.691106	NA	0.490304	NA	1.27862	NA	0.749933	NA	-0.985878	NA	0.0935598	NA	-0.0588269	NA	1.47618	NA	ENSG00000188909
ENSG00000095564	BTAF1	9044	0.579191	0.010057	0.291007	0.234633	0.044083	0.964684	-0.230116	0.623016	-0.342141	0.442798	-0.316557	0.999548	0.809307	1.22022e-05	0.633148	0.00109974	0.36064	0.224934	ENSG00000095564
ENSG00000064726	BTBD1	53339	-0.228974	0.0870595	-0.0631572	0.680015	-0.0673371	0.868473	-0.517465	0.00420879	-0.237623	0.314031	-0.151792	0.999548	0.288491	0.00847733	0.174466	0.153721	0.0844551	0.729339	ENSG00000064726
ENSG00000148925	BTBD10	84280	0.0938791	0.597468	-0.0278001	0.881	-0.0518841	0.930223	-0.223923	0.405429	-0.31505	0.21754	-0.147342	0.999548	0.317802	0.00974743	0.28725	0.0256156	0.095458	0.727553	ENSG00000148925
ENSG00000151136	BTBD11	121551	-1.04004	0.707893	0.531498	NA	1.70421	NA	-3.05252	NA	0.517724	NA	0.801836	NA	2.01249	NA	0.013774	NA	0.902371	NA	ENSG00000151136
ENSG00000138152	BTBD16	118663	-1.21887	NA	-1.89995	NA	-2.08806	NA	-0.761598	NA	-1.26773	NA	-2.19565	NA	-0.45727	NA	-0.632219	NA	0.10759	NA	ENSG00000138152
ENSG00000204347	BTBD17	388419	2.33377	NA	0.690902	NA	1.4753	NA	2.94527	NA	2.17613	NA	2.86318	NA	-0.611504	NA	-1.48523	NA	-1.38788	NA	ENSG00000204347
ENSG00000233436	BTBD18	643376	1.37217	NA	0.691091	NA	0.490274	NA	1.27858	NA	0.749896	NA	-0.269582	NA	0.0935822	NA	-0.0588045	NA	0.759857	NA	ENSG00000233436
ENSG00000222009	BTBD19	149478	-1.45807	0.11337	-1.91789	0.0257253	0.42266	0.840694	0.694304	NA	-0.605186	NA	0.952066	0.999548	-2.15238	0.0430001	-1.3127	0.173067	-0.529406	0.767851	ENSG00000222009
ENSG00000133243	BTBD2	55643	-0.22865	0.471592	-0.492424	0.0837676	-0.0291853	0.980927	1.12457	0.00318336	0.711457	0.118185	0.509532	0.999548	-1.35322	3.87909e-10	-1.20388	4.91409e-08	-0.538717	0.0961249	ENSG00000133243
ENSG00000132640	BTBD3	22903	0.116421	0.509078	0.0801907	0.658432	-0.260368	0.38925	-0.328176	0.188262	-0.326393	0.223741	-0.235841	0.999548	0.444597	0.000404407	0.406584	0.00185158	-0.0245269	0.948013	ENSG00000132640
ENSG00000184887	BTBD6	90135	0.00267972	0.993741	0.216295	0.306854	0.345854	0.345186	0.0873956	0.847791	0.24539	0.509966	0.32424	0.999548	-0.0847159	0.621779	-0.0290951	0.886519	0.0216135	0.961116	ENSG00000184887
ENSG00000011114	BTBD7	55727	-0.0347198	0.902689	-0.025308	0.927315	0.0349349	0.970203	-0.299043	0.434043	-0.0634713	0.91555	-0.159384	0.999548	0.264324	0.134151	0.0381632	0.871531	0.194318	0.532072	ENSG00000011114
ENSG00000189195	BTBD8	284697	-1.55078	0.0101196	-1.74039	0.00281103	-1.00184	0.378456	-0.246306	0.871636	0.0681172	0.971355	-0.341909	0.999548	-1.30447	0.0175242	-1.80851	0.00145047	-0.659935	0.4862	ENSG00000189195
ENSG00000183826	BTBD9	114781	0.435993	0.0472111	0.045076	0.868522	-0.228644	0.667643	0.344174	0.396696	0.140763	0.796664	0.172625	0.999548	0.0918187	0.704659	-0.0956866	0.717665	-0.401269	0.20031	ENSG00000183826
ENSG00000174808	BTC	685	2.2153	0.00271272	1.46258	0.0610556	0.862319	0.647794	2.17991	0.0609833	1.38963	0.328679	1.11155	0.999548	0.0353878	0.97008	0.0729511	0.939894	-0.249227	0.888133	ENSG00000174808
ENSG00000169814	BTD	686	0.102193	0.706585	0.0225626	0.937886	-0.325201	0.478513	0.945391	0.00176191	0.641695	0.0607811	0.0894739	0.999548	-0.843198	1.32731e-06	-0.619132	0.00055921	-0.414675	0.105646	ENSG00000169814
ENSG00000145741	BTF3	689	-0.32106	0.0426548	-0.0332298	0.867135	-0.199782	0.566386	-0.455024	0.0515681	-0.359169	0.183343	-0.250186	0.999548	0.133964	0.357467	0.32594	0.0170239	0.0504038	0.883576	ENSG00000145741
ENSG00000134717	BTF3L4	91408	0.604745	0.135426	0.660073	0.0917792	0.12805	0.933308	0.46581	0.525554	0.53319	0.470601	0.101244	0.999548	0.138935	0.71071	0.126883	0.759864	0.0268056	0.979296	ENSG00000134717
ENSG00000133639	BTG1	694	-0.389466	0.00984422	-0.396537	0.0070236	-0.161644	0.654926	-0.788528	0.000115046	-0.878403	2.1879e-05	-0.251483	0.999548	0.399062	0.00180622	0.481866	0.000183801	0.089839	0.765401	ENSG00000133639
ENSG00000159388	BTG2	7832	-1.03102	0.01187	-0.739291	0.068711	-0.291611	0.794915	0.28258	0.760154	0.253641	0.797019	0.125156	0.999548	-1.3136	0.000169069	-0.992932	0.00571297	-0.416766	0.505966	ENSG00000159388
ENSG00000154640	BTG3	10950	0.56403	0.0402033	0.279267	0.352085	0.0703254	0.953095	-0.0312157	0.967105	0.0365487	0.967185	-0.186013	0.999548	0.595246	0.00984789	0.242718	0.374777	0.256339	0.557377	ENSG00000154640
ENSG00000010671	BTK	695	3.43868	NA	2.33619	NA	-0.471484	NA	1.31679	NA	1.66203	NA	-1.28625	NA	2.12189	NA	0.674157	NA	0.814769	NA	ENSG00000010671
ENSG00000186265	BTLA	151888	0.410383	NA	-0.270685	NA	-0.47152	NA	2.32822	NA	0.305887	NA	0.0257054	NA	-1.91783	NA	-0.576572	NA	-0.497226	NA	ENSG00000186265
ENSG00000124557	BTN1A1	696	-0.400567	NA	-0.119866	NA	-0.297331	NA	-0.494047	NA	-0.0609735	NA	-1.0571	NA	0.0934798	NA	-0.0588923	NA	0.759771	NA	ENSG00000124557
ENSG00000112763	BTN2A1	11120	1.71482	2.75563e-11	1.18272	9.76198e-06	0.430799	0.470614	0.546754	0.23785	0.302836	0.605051	0.139035	0.999548	1.16807	6.56357e-08	0.879886	9.77661e-05	0.291763	0.480049	ENSG00000112763
ENSG00000124508	BTN2A2	10385	0.399804	0.144672	-0.0663573	0.837746	0.246821	0.701773	0.653483	0.087985	0.0111301	0.987644	0.249716	0.999548	-0.253679	0.228277	-0.0774874	0.76539	-0.00289549	0.996587	ENSG00000124508
ENSG00000026950	BTN3A1	11119	0.0522682	0.884805	-0.15644	0.612154	0.00236464	0.998243	0.383411	0.405872	0.265466	0.614558	-0.136614	0.999548	-0.331143	0.0965464	-0.421906	0.0367001	0.138979	0.744384	ENSG00000026950
ENSG00000186470	BTN3A2	11118	-0.126642	0.606964	-0.69191	0.00051145	0.0173368	0.984118	0.166466	0.689409	-0.341066	0.35491	0.0350981	0.999548	-0.293107	0.0679503	-0.350844	0.032104	-0.0177613	0.972071	ENSG00000186470
ENSG00000111801	BTN3A3	10384	-0.324876	0.375979	-1.13267	0.000369633	-0.216972	0.82575	0.125636	0.873795	-0.638616	0.275998	-0.0862102	0.999548	-0.450512	0.111043	-0.494055	0.0921768	-0.130762	0.849516	ENSG00000111801
ENSG00000168903	BTNL3	10917	1.37208	NA	0.691001	NA	0.490169	NA	1.99971	NA	1.47102	NA	1.17285	NA	-0.62763	NA	-0.780017	NA	-0.682681	NA	ENSG00000168903
ENSG00000113303	BTNL8	79908	2.23897	0.0867398	1.94693	0.142935	2.72498	0.205943	2.86673	0.368047	2.00572	NA	3.40777	0.999548	-0.627757	0.797777	-0.0587919	0.984334	-0.682794	0.895704	ENSG00000113303
ENSG00000165810	BTNL9	153579	1.3722	NA	0.691135	NA	0.490317	NA	1.27866	NA	0.0286578	NA	-0.934807	NA	0.0935389	NA	0.662477	NA	1.42512	NA	ENSG00000165810
ENSG00000166167	BTRC	8945	0.181772	0.264608	0.190023	0.221214	0.0536679	0.927562	0.0612557	0.866737	0.174068	0.571669	0.108408	0.999548	0.120516	0.403937	0.0159542	0.930636	-0.0547403	0.87145	ENSG00000166167
ENSG00000169679	BUB1	699	-0.115703	0.58969	0.137424	0.506176	-0.00292359	0.996426	-0.600197	0.0226573	-0.207853	0.583165	-0.0776908	0.999548	0.484494	0.00122285	0.345277	0.0320274	0.0747672	0.847925	ENSG00000169679
ENSG00000156970	BUB1B	701	-0.0124411	0.964281	0.160586	0.449117	0.00788022	0.992635	-0.073631	0.872157	0.136997	0.762559	-0.0366546	0.999548	0.0611898	0.755037	0.0235889	0.915995	0.0445348	0.917211	ENSG00000156970
ENSG00000259288	BUB1B-PAK6	NA	0.410435	NA	-0.270641	NA	0.513776	NA	0.31689	NA	-0.211799	NA	0.475266	NA	0.093545	NA	-0.0588417	NA	0.03851	NA	ENSG00000259288
ENSG00000154473	BUB3	9184	-0.149057	0.305689	0.0394934	0.811368	-0.0849151	0.836402	-0.380203	0.0568275	-0.196308	0.450711	-0.0134383	0.999548	0.231146	0.043357	0.235801	0.047515	-0.0714768	0.787246	ENSG00000154473
ENSG00000137656	BUD13	84811	0.0882778	0.666102	0.144327	0.439287	0.00779655	0.991327	-0.16298	0.64259	0.116806	0.772233	-0.182973	0.999548	0.251258	0.0882408	0.0275212	0.891704	0.190769	0.448628	ENSG00000137656
ENSG00000071462	BUD23	114049	0.317241	0.022805	0.243227	0.0913452	0.101877	0.803301	0.315055	0.162185	0.291897	0.237907	0.0393073	0.999548	0.00218602	0.989067	-0.0486706	0.760337	0.0625696	0.833949	ENSG00000071462
ENSG00000106245	BUD31	8896	0.031236	0.905369	0.158277	0.480016	0.178144	0.737983	-0.0387727	0.941769	-0.0364839	0.954685	0.0135596	0.999548	0.0700087	0.732248	0.194761	0.316774	0.164584	0.622659	ENSG00000106245
ENSG00000112276	BVES	11149	1.443	0.00342756	0.224182	0.726637	-0.0133281	0.995423	1.40485	0.0704588	0.290573	0.819855	0.288956	0.999548	0.0381461	0.950507	-0.0663908	0.914009	-0.302284	0.765728	ENSG00000112276
ENSG00000112578	BYSL	705	0.621375	0.000334033	0.688814	6.90148e-05	0.158555	0.751006	0.103376	0.804148	0.194774	0.613544	0.000961055	0.999548	0.517998	0.000539284	0.49404	0.00143509	0.157593	0.600302	ENSG00000112578
ENSG00000082153	BZW1	9689	0.560012	0.00738704	0.598229	0.0042338	0.0339632	0.972479	-0.227023	0.600849	0.118336	0.82202	-0.234779	0.999548	0.787034	5.45909e-06	0.479894	0.00992909	0.268742	0.376724	ENSG00000082153
ENSG00000136261	BZW2	28969	0.0624222	0.59363	0.0122999	0.925371	-0.0349591	0.930949	-0.0207055	0.937299	-0.266019	0.100333	-0.143889	0.999548	0.0831276	0.370156	0.278319	0.000897118	0.108929	0.46534	ENSG00000136261
ENSG00000214688	C10orf105	414152	1.37206	NA	0.690981	NA	1.47538	NA	1.99967	NA	1.47098	NA	2.15803	NA	-0.627615	NA	-0.780002	NA	-0.68265	NA	ENSG00000214688
ENSG00000183559	C10orf120	399814	0.410455	NA	-0.27062	NA	-0.471452	NA	0.316926	NA	-0.211763	NA	-0.509932	NA	0.0935296	NA	-0.058857	NA	0.0384792	NA	ENSG00000183559
ENSG00000237489	C10orf143	387723	1.37209	NA	0.691031	NA	0.490184	NA	1.99974	NA	0.749746	NA	1.17289	NA	-0.627653	NA	-0.0587145	NA	-0.682703	NA	ENSG00000237489
ENSG00000203942	C10orf62	414157	1.37207	NA	0.690965	NA	0.490148	NA	1.31115	NA	2.25488	NA	1.23541	NA	0.0609244	NA	-1.56392	NA	-0.745258	NA	ENSG00000203942
ENSG00000179133	C10orf67	256815	-0.0181431	0.988195	-0.868709	0.33334	-0.195044	0.954322	-0.0556534	0.982078	-0.898077	NA	-0.921136	0.999548	0.0375103	0.972665	0.0293686	0.981755	0.726093	0.625756	ENSG00000179133
ENSG00000165863	C10orf82	143379	2.3339	NA	1.65283	NA	0.490234	NA	2.24028	NA	1.71159	NA	-0.269653	NA	0.0936272	NA	-0.0587595	NA	0.759887	NA	ENSG00000165863
ENSG00000119965	C10orf88	80007	0.104153	0.651101	-0.0416539	0.861326	-0.12079	0.835131	0.195444	0.628697	0.23327	0.56021	0.00163047	0.999548	-0.0912905	0.654395	-0.274924	0.145895	-0.12242	0.751485	ENSG00000119965
ENSG00000154493	C10orf90	118611	-1.31653	0.000424368	-1.68821	1.67827e-06	-0.540759	0.414314	-0.645789	0.327765	-0.716954	0.287436	-0.616825	0.999548	-0.670743	0.0316401	-0.97126	0.00216195	0.0760655	0.922444	ENSG00000154493
ENSG00000120055	C10orf95	79946	-0.495458	NA	-0.214753	NA	-0.404372	NA	-1.22749	NA	0.442191	NA	-0.827443	NA	0.732033	NA	-0.656944	NA	0.423071	NA	ENSG00000120055
ENSG00000137720	C11orf1	64776	-0.0254776	0.943189	0.04969	0.876014	0.117339	0.886556	0.535451	0.228266	0.575582	0.202815	0.306528	0.999548	-0.560928	0.0162437	-0.525892	0.028903	-0.189189	0.695134	ENSG00000137720
ENSG00000171067	C11orf24	53838	-0.216533	0.390648	0.367097	0.0951363	-0.152745	0.810166	-0.33153	0.388471	0.269968	0.51781	-0.137702	0.999548	0.114996	0.555308	0.0971294	0.652121	-0.0150431	0.978462	ENSG00000171067
ENSG00000174370	C11orf45	NA	-1.20253	0.119713	-0.506226	0.490499	-0.211858	0.933308	-0.102907	0.961581	-0.758712	NA	0.251273	0.999548	-1.09962	0.147473	0.252485	0.760391	-0.463131	0.757525	ENSG00000174370
ENSG00000149179	C11orf49	79096	-0.588721	0.000324528	-0.564356	0.000579492	-0.137727	0.768312	0.110849	0.770897	-0.0852579	0.843606	0.0881791	0.999548	-0.69957	5.26585e-07	-0.479098	0.00105925	-0.225906	0.344431	ENSG00000149179
ENSG00000149300	C11orf52	91894	0.649405	NA	-0.031677	NA	1.52716	NA	0.555815	NA	0.0271155	NA	2.20994	NA	0.0935905	NA	-0.0587925	NA	-0.682781	NA	ENSG00000149300
ENSG00000182919	C11orf54	28970	-0.0268507	0.919329	-0.200154	0.355581	-0.00906619	0.991327	0.0164595	0.978225	-0.0151888	0.982051	-0.0799156	0.999548	-0.0433102	0.856331	-0.184965	0.402501	0.0708494	0.883222	ENSG00000182919
ENSG00000110696	C11orf58	10944	-0.08405	0.648022	0.0722005	0.697891	-0.195513	0.5695	-0.324502	0.199648	-0.179338	0.575365	-0.192517	0.999548	0.240452	0.0743156	0.251538	0.0728063	-0.00299598	0.994564	ENSG00000110696
ENSG00000166323	C11orf65	160140	-3.2247	0.120673	-0.500812	NA	-0.102412	NA	-0.118517	NA	0.706686	NA	0.412786	0.999548	-3.10618	0.0786199	-1.2075	0.492732	-0.515198	NA	ENSG00000166323
ENSG00000175573	C11orf68	83638	-0.0926687	0.75823	-0.490154	0.0451447	-0.20864	0.750898	0.116128	0.841378	-0.0680005	0.924435	0.0580838	0.999548	-0.208796	0.363898	-0.422153	0.0566051	-0.266724	0.474037	ENSG00000175573
ENSG00000180425	C11orf71	54494	-2.93282	5.06337e-06	-2.23585	5.77221e-05	-0.331306	0.839091	-0.766533	0.552828	-0.718328	0.54417	-0.205162	0.999548	-2.16629	1.32192e-05	-1.51753	0.00195628	-0.126144	0.91739	ENSG00000180425
ENSG00000173715	C11orf80	79703	-1.08389	1.02302e-05	-0.772307	0.000882623	-0.0643308	0.945279	-0.367744	0.413456	-0.143595	0.800559	-0.0557634	0.999548	-0.716149	0.000109045	-0.628712	0.000981556	-0.00856741	0.988534	ENSG00000173715
ENSG00000173237	C11orf86	254439	-1.57751	0.0102239	-0.805409	0.214631	-0.786054	0.56032	-0.212493	0.890672	0.0893099	0.965357	0.453551	0.999548	-1.36502	0.00925033	-0.894719	0.116006	-1.2396	0.0973311	ENSG00000173237
ENSG00000185742	C11orf87	399947	1.37218	NA	0.691091	NA	0.490259	NA	0.557275	NA	0.749896	NA	0.451728	NA	0.814907	NA	-0.0588045	NA	0.0385318	NA	ENSG00000185742
ENSG00000205177	C11orf91	100131378	-0.53788	NA	-0.257174	NA	-1.4198	NA	-1.33057	NA	0.440723	NA	-3.34886	NA	0.792685	NA	-0.697897	NA	1.92906	NA	ENSG00000205177
ENSG00000234776	C11orf94	143678	1.37219	NA	0.691108	NA	0.490269	NA	2.43405	NA	1.12194	NA	1.18946	NA	-1.06186	NA	-0.43083	NA	-0.69919	NA	ENSG00000234776
ENSG00000188070	C11orf95	65998	0.552837	0.0220291	0.0129859	0.968375	0.252343	0.661898	0.570636	0.119909	0.378152	0.393849	0.390256	0.999548	-0.0177992	0.944809	-0.365166	0.0694935	-0.137913	0.741226	ENSG00000188070
ENSG00000187479	C11orf96	387763	-1.81748	NA	-0.652468	NA	-0.931306	NA	-3.34092	NA	-0.593619	NA	-0.969799	NA	1.52344	NA	-0.0588485	NA	0.0384921	NA	ENSG00000187479
ENSG00000278615	C11orf98	102288414	-0.13086	0.719324	0.160636	0.632224	-0.0324176	0.979478	-0.212811	0.734455	0.167314	0.806499	-0.198905	0.999548	0.081951	0.775927	-0.00667827	0.984425	0.166488	0.751485	ENSG00000278615
ENSG00000133641	C12orf29	91298	0.291059	0.186541	0.728319	0.000226003	-0.165757	0.775016	0.0586773	0.912997	0.198942	0.664756	-0.115863	0.999548	0.232381	0.224752	0.529377	0.0033974	-0.0498931	0.917211	ENSG00000133641
ENSG00000047621	C12orf4	57102	-0.368852	0.169106	-0.151564	0.60008	-0.18991	0.783926	-0.374571	0.416622	-0.0900258	0.89902	-0.157233	0.999548	0.00571874	0.9838	-0.0615381	0.834361	-0.032677	0.960146	ENSG00000047621
ENSG00000180116	C12orf40	283461	3.75434	NA	0.691027	NA	0.490195	NA	3.66066	NA	0.749771	NA	0.451603	NA	0.093679	NA	-0.0587448	NA	0.0385915	NA	ENSG00000180116
ENSG00000179088	C12orf42	374470	1.37199	NA	4.78126	NA	1.47533	NA	1.99956	NA	5.56116	NA	1.43662	NA	-0.627574	NA	-0.779896	NA	0.0387164	NA	ENSG00000179088
ENSG00000157895	C12orf43	64897	0.214653	0.215607	0.433081	0.004312	0.0554452	0.930949	0.255459	0.374543	0.55265	0.0220564	-0.0182646	0.999548	-0.0408066	0.811628	-0.119569	0.466196	0.0737098	0.826321	ENSG00000157895
ENSG00000151131	C12orf45	121053	-0.279469	0.0590785	0.104886	0.513171	-0.148605	0.67122	0.0957612	0.763249	0.257444	0.321354	-0.0944834	0.999548	-0.37523	0.00158775	-0.152559	0.266607	-0.0541221	0.860136	ENSG00000151131
ENSG00000165805	C12orf50	160419	1.37208	NA	0.691001	NA	0.490169	NA	1.99971	NA	1.47102	NA	1.17285	NA	-0.62763	NA	-0.780017	NA	-0.682681	NA	ENSG00000165805
ENSG00000185306	C12orf56	115749	1.37212	NA	0.691045	NA	1.98555	NA	1.27849	NA	0.749804	NA	1.94694	NA	0.093628	NA	-0.0587587	NA	0.038601	NA	ENSG00000185306
ENSG00000111678	C12orf57	113246	-0.0857836	0.680787	-0.229303	0.214986	0.0744652	0.903602	-0.0707605	0.865882	-0.147974	0.710569	0.162059	0.999548	-0.0150231	0.940348	-0.0813294	0.666766	-0.0875941	0.804422	ENSG00000111678
ENSG00000182993	C12orf60	144608	-0.205809	0.730104	-0.285202	0.600837	-0.036269	0.984923	0.361638	0.755811	-0.611963	0.54417	-0.238349	0.999548	-0.567447	0.290018	0.32676	0.554487	0.20208	0.862587	ENSG00000182993
ENSG00000130921	C12orf65	91574	-0.216077	0.387748	-0.00424608	0.988409	0.134996	0.840694	-0.0638696	0.909939	0.132343	0.80419	0.0488226	0.999548	-0.152208	0.472731	-0.136589	0.552168	0.0861737	0.854187	ENSG00000130921
ENSG00000174206	C12orf66	144577	-0.367784	0.165092	0.0592746	0.837704	0.142641	0.839468	-0.270429	0.584675	0.371269	0.411334	0.112488	0.999548	-0.0973551	0.689677	-0.311994	0.168811	0.0301523	0.960926	ENSG00000174206
ENSG00000204954	C12orf73	728568	-0.325712	0.279461	-0.131266	0.679683	0.230076	0.746348	-0.481304	0.315143	-0.26883	0.647271	-0.151816	0.999548	0.155592	0.571312	0.137564	0.646204	0.381892	0.310435	ENSG00000204954
ENSG00000235162	C12orf75	387882	0.344753	0.610372	0.105284	0.885244	0.258528	0.894022	0.057186	0.97126	0.255192	0.863021	0.157995	0.999548	0.287567	0.603731	-0.149908	0.815937	0.100533	0.939985	ENSG00000235162
ENSG00000174456	C12orf76	400073	-0.471886	0.553567	-0.629956	0.396337	0.23341	0.929906	0.221077	0.900267	-0.0569085	0.979393	-0.00623291	0.999548	-0.692963	0.297454	-0.573047	0.425022	0.239643	0.873757	ENSG00000174456
ENSG00000226792	C13orf42	647166	1.37202	NA	0.690955	NA	0.490109	NA	2.72704	NA	1.47704	NA	1.90018	NA	-1.35502	NA	-0.786082	NA	-1.41007	NA	ENSG00000226792
ENSG00000283199	C13orf46	100507747	0.410423	NA	-0.270662	NA	1.10034	NA	0.664838	NA	0.0705151	NA	2.36783	NA	-0.254414	NA	-0.341177	NA	-1.26749	NA	ENSG00000283199
ENSG00000179933	C14orf119	55017	-0.567138	2.11113e-08	-0.266077	0.0108612	-0.124301	0.611345	-0.152508	0.471636	0.0435761	0.885341	-0.0618454	0.999548	-0.41463	1.00148e-05	-0.309653	0.00145446	-0.0624559	0.780047	ENSG00000179933
ENSG00000227051	C14orf132	56967	-2.14979	0.319215	-0.0148068	NA	-0.297751	NA	-1.00631	NA	1.80769	NA	1.41068	NA	-1.14348	NA	-1.8225	NA	-1.70843	NA	ENSG00000227051
ENSG00000179476	C14orf28	122525	-0.434591	0.706808	-3.27868	0.0312911	-1.05613	0.622514	0.114379	0.956977	-2.5543	NA	-0.386086	0.999548	-0.54897	0.207157	-0.724386	0.102563	-0.670043	0.312402	ENSG00000179476
ENSG00000179008	C14orf39	317761	-2.90446	NA	-1.3424	NA	-1.48037	NA	-2.27457	NA	-2.56476	NA	-2.44942	NA	-0.629888	NA	1.22236	NA	0.969052	NA	ENSG00000179008
ENSG00000100802	C14orf93	60686	-0.0164825	0.964916	-0.158447	0.577097	0.14816	0.840694	0.367417	0.402222	-0.332692	0.470987	-0.212552	0.999548	-0.383899	0.0467704	0.174246	0.428694	0.360712	0.193205	ENSG00000100802
ENSG00000167173	C15orf39	56905	0.161269	0.547251	0.536183	0.0188858	0.247999	0.659524	0.157823	0.753068	0.45022	0.271296	0.216685	0.999548	0.0034458	0.9893	0.085963	0.737449	0.0313138	0.95719	ENSG00000167173
ENSG00000169609	C15orf40	123207	-1.10556	0.00240118	-0.636311	0.0934374	0.0259068	0.986441	-0.233451	0.778766	-0.0654566	0.956669	0.274264	0.999548	-0.872108	0.0048148	-0.570855	0.0896222	-0.248357	0.711244	ENSG00000169609
ENSG00000166920	C15orf48	84419	-0.226238	NA	-1.86909	NA	-2.06995	NA	1.12793	NA	-3.14088	NA	-0.660729	NA	-1.35417	NA	1.27179	NA	-1.40922	NA	ENSG00000166920
ENSG00000189227	C15orf61	145853	-0.538876	0.153711	-0.0813183	0.854171	-0.0796676	0.957703	-0.0050503	0.994596	0.0996735	0.922138	0.180162	0.999548	-0.533826	0.0825287	-0.180992	0.630575	-0.259829	0.673085	ENSG00000189227
ENSG00000188277	C15orf62	643338	-0.47825	0.858387	2.08145	0.25268	-1.36017	NA	-0.436489	NA	1.88078	NA	-1.75828	0.999548	-0.0417609	0.973409	0.200672	0.873272	0.39811	NA	ENSG00000188277
ENSG00000261652	C15orf65	145788	-1.24825	0.027506	-1.12176	0.0339719	-0.960404	0.315739	-1.11451	0.264428	-1.30027	NA	-1.2115	0.999548	-0.133738	0.841498	0.178506	0.793508	0.251094	0.845507	ENSG00000261652
ENSG00000166455	C16orf46	123775	1.15994	0.0365336	0.928109	0.0868251	0.587792	0.652879	1.13847	0.156987	0.708138	0.454584	0.307088	0.999548	0.0214699	0.966214	0.219971	0.622858	0.280703	0.713577	ENSG00000166455
ENSG00000185905	C16orf54	283897	0.410455	NA	-0.27062	NA	-0.471452	NA	0.316926	NA	-0.211763	NA	-0.509932	NA	0.0935296	NA	-0.058857	NA	0.0384792	NA	ENSG00000185905
ENSG00000125149	C16orf70	80262	-0.132459	0.499474	-0.188545	0.299844	0.0518133	0.939291	-0.3197	0.266123	-0.325461	0.279222	0.0746422	0.999548	0.187241	0.218111	0.136916	0.418022	-0.0228289	0.957986	ENSG00000125149
ENSG00000166246	C16orf71	146562	-0.43593	0.800553	-1.93035	0.236097	0.188475	NA	0.64247	NA	-0.661165	NA	0.383548	0.999548	-1.0784	0.387658	-1.26919	0.332941	-0.195072	NA	ENSG00000166246
ENSG00000182831	C16orf72	29035	-0.580337	6.13496e-10	-0.488398	1.21662e-07	-0.218412	0.184487	-1.18991	1.07862e-21	-0.910224	9.5203e-13	-0.378931	0.193591	0.609575	6.13014e-14	0.421826	6.3894e-07	0.160519	0.243005	ENSG00000182831
ENSG00000154102	C16orf74	404550	-1.22938	0.00290274	-1.24668	0.00102143	-0.517089	0.501908	-0.392869	0.63446	-0.476976	0.537242	-0.545353	0.999548	-0.836512	0.00653897	-0.769706	0.0150807	0.028264	0.977256	ENSG00000154102
ENSG00000166152	C16orf78	123970	2.33391	NA	0.691056	NA	0.490224	NA	2.24027	NA	0.749823	NA	0.451655	NA	0.0936347	NA	-0.058767	NA	0.0385693	NA	ENSG00000166152
ENSG00000234186	C16orf82	162083	1.3721	NA	0.691021	NA	3.1571	NA	1.27845	NA	0.749761	NA	3.11846	NA	0.0936463	NA	-0.0587404	NA	0.0386375	NA	ENSG00000234186
ENSG00000159761	C16orf86	388284	1.8022	0.40587	-1.78136	NA	0.60562	NA	4.77434	NA	-0.0106507	NA	3.02739	NA	-2.97214	NA	-1.77071	NA	-2.42177	NA	ENSG00000159761
ENSG00000155330	C16orf87	388272	-0.0645339	0.800261	-0.0524659	0.832572	0.0458388	0.956727	-0.313167	0.39026	0.167071	0.722708	-0.0369117	0.999548	0.248633	0.180815	-0.219537	0.279359	0.0827505	0.852547	ENSG00000155330
ENSG00000153446	C16orf89	146556	2.79563	0.192096	3.9072	NA	2.31497	NA	3.31992	NA	3.29891	NA	2.66016	0.999548	-0.524286	0.731796	0.608285	0.67887	-0.34519	NA	ENSG00000153446
ENSG00000215131	C16orf90	646174	0.410455	NA	-0.27062	NA	-0.471452	NA	0.316926	NA	-0.211763	NA	-0.509932	NA	0.0935296	NA	-0.058857	NA	0.0384792	NA	ENSG00000215131
ENSG00000174109	C16orf91	283951	0.0914038	0.752695	0.108115	0.697439	0.367949	0.424688	0.126073	0.818431	-0.0043846	0.994598	0.188159	0.999548	-0.0346695	0.895966	0.1125	0.659375	0.179791	0.662189	ENSG00000174109
ENSG00000167194	C16orf92	146378	2.33389	NA	0.691036	NA	1.43991	NA	2.24024	NA	0.749789	NA	1.40131	NA	0.0936495	NA	-0.0587522	NA	0.0385989	NA	ENSG00000167194
ENSG00000260456	C16orf95	100506581	-1.35949	0.12611	-1.36388	0.0805714	-0.474234	0.806242	-0.650412	0.689877	-1.30269	NA	-0.726442	0.999548	-0.70908	0.240462	-0.061192	0.936043	0.252208	0.848783	ENSG00000260456
ENSG00000205832	C16orf96	342346	1.37216	NA	0.691087	NA	1.47554	NA	1.27859	NA	0.749901	NA	-0.0826974	NA	0.0935726	NA	-0.0588141	NA	1.55824	NA	ENSG00000205832
ENSG00000256806	C17orf100	388327	-1.83553	0.105306	-0.709862	0.434832	-0.489795	0.839091	-1.31195	NA	-0.428943	NA	-0.579585	0.999548	-0.523588	0.491749	-0.280919	0.744621	0.0897901	0.963613	ENSG00000256806
ENSG00000205710	C17orf107	100130311	1.37221	NA	0.691129	NA	1.46335	NA	1.75357	NA	0.702129	NA	1.29222	NA	-0.381356	NA	-0.0109996	NA	0.171131	NA	ENSG00000205710
ENSG00000267221	C17orf113	110806298	-0.139893	0.958759	1.0647	NA	0.421506	NA	1.0272	NA	1.91635	NA	1.69055	NA	-1.16709	NA	-0.851645	NA	-1.26905	NA	ENSG00000267221
ENSG00000262165	C17orf114	NA	1.37212	NA	0.691024	NA	2.25384	NA	2.20375	NA	3.12427	NA	3.86839	NA	-0.831628	NA	-2.43325	NA	-1.61456	NA	ENSG00000262165
ENSG00000258315	C17orf49	124944	-3.25209	0.0210521	-0.630745	0.519084	0.0198871	0.995659	-3.82431	0.030486	-0.832357	NA	-0.285009	0.999548	0.572215	0.487606	0.201613	0.841738	0.304896	0.872067	ENSG00000258315
ENSG00000270806	C17orf50	146853	3.47023	NA	0.690957	NA	0.490126	NA	4.0978	NA	1.47094	NA	1.17277	NA	-0.627565	NA	-0.779984	NA	-0.682648	NA	ENSG00000270806
ENSG00000186665	C17orf58	284018	-0.0478891	0.911219	-0.135954	0.729437	0.410253	0.558087	-0.298219	0.655783	-0.16733	0.834776	-0.0696813	0.999548	0.25033	0.41031	0.0313757	0.936308	0.479934	0.257345	ENSG00000186665
ENSG00000214226	C17orf67	339210	-2.11684	0.108984	-4.75358	0.00291827	-1.13773	0.706315	0.13603	NA	-3.49864	NA	-0.38698	0.999548	-2.25287	0.0642177	-1.25495	0.314101	-0.75075	0.753233	ENSG00000214226
ENSG00000108666	C17orf75	64149	0.0229715	0.923547	0.239009	0.201175	0.0183207	0.981123	-0.142518	0.710424	0.0579732	0.910377	-0.0824981	0.999548	0.16549	0.318782	0.181036	0.29914	0.100819	0.774339	ENSG00000108666
ENSG00000141219	C17orf80	55028	0.0818456	0.663544	-0.129846	0.455593	0.00123873	0.998317	-0.257684	0.356504	-0.303235	0.28329	-0.0713211	0.999548	0.33953	0.0114566	0.173389	0.259829	0.0725598	0.830643	ENSG00000141219
ENSG00000187624	C17orf97	400566	-0.811641	0.0109958	-0.489157	0.0962186	0.170428	0.834941	-0.100984	0.894352	0.233113	0.717957	0.241206	0.999548	-0.710657	0.00191361	-0.72227	0.00196071	-0.0707775	0.905863	ENSG00000187624
ENSG00000275489	C17orf98	388381	2.33386	NA	2.62349	NA	1.4399	NA	2.24021	NA	2.6822	NA	0.679968	NA	0.0936572	NA	-0.0587144	NA	0.759932	NA	ENSG00000275489
ENSG00000187997	C17orf99	100141515	0.41044	NA	-0.270635	NA	-0.471467	NA	0.316888	NA	-0.211801	NA	-0.509969	NA	0.0935521	NA	-0.0588345	NA	0.0385018	NA	ENSG00000187997
ENSG00000141428	C18orf21	83608	0.362535	0.0879239	0.533954	0.00762728	-0.0211637	0.981234	0.000665138	0.998888	0.200755	0.65167	-0.0417933	0.999548	0.36187	0.0413999	0.333198	0.0746863	0.0206296	0.971066	ENSG00000141428
ENSG00000152242	C18orf25	147339	0.235158	0.159818	-0.308749	0.0559291	0.0387747	0.954933	-0.0381589	0.928506	-0.52984	0.0365279	-0.0241393	0.999548	0.273317	0.0628157	0.221091	0.163463	0.062914	0.86547	ENSG00000152242
ENSG00000177576	C18orf32	497661	-0.165885	0.687688	-0.335936	0.361002	0.073633	0.958385	0.161357	0.842723	-0.0888264	0.930293	0.246478	0.999548	-0.327242	0.299817	-0.24711	0.47623	-0.172845	0.80085	ENSG00000177576
ENSG00000166845	C18orf54	162681	0.0687159	0.865746	0.201691	0.553577	0.342442	0.617397	-0.443819	0.419105	-0.396464	0.496955	-0.156093	0.999548	0.512535	0.0392709	0.598156	0.0176655	0.498536	0.172451	ENSG00000166845
ENSG00000206043	C18orf63	644041	1.37217	NA	0.691106	NA	0.490259	NA	1.27858	NA	0.0285857	NA	0.451728	NA	0.0935822	NA	0.66252	NA	0.0385318	NA	ENSG00000206043
ENSG00000131943	C19orf12	83636	-0.448967	0.503836	-0.250026	0.722223	-0.0838475	0.97496	-0.600199	0.611417	-0.423243	0.758521	-0.273945	0.999548	0.151233	0.803037	0.173218	0.790338	0.190097	0.881003	ENSG00000131943
ENSG00000177025	C19orf18	147685	1.37217	NA	0.691106	NA	0.490259	NA	1.27858	NA	0.0285857	NA	0.451728	NA	0.0935822	NA	0.66252	NA	0.0385318	NA	ENSG00000177025
ENSG00000119559	C19orf25	148223	0.38984	0.276124	0.513056	0.120869	0.438601	0.517371	0.127433	0.870249	0.123265	0.887373	0.371997	0.999548	0.262407	0.36899	0.389791	0.183311	0.0666042	0.927657	ENSG00000119559
ENSG00000167644	C19orf33	64073	-0.027123	0.949794	0.246624	0.481251	0.138116	0.896564	0.257993	0.689916	0.581653	0.299916	0.261756	0.999548	-0.285116	0.317489	-0.335029	0.260335	-0.123639	0.852256	ENSG00000167644
ENSG00000214212	C19orf38	255809	1.37214	NA	0.691075	NA	1.98556	NA	1.27853	NA	0.0285312	NA	1.94698	NA	0.0936055	NA	0.662544	NA	0.0385785	NA	ENSG00000214212
ENSG00000105072	C19orf44	84167	0.239103	0.311622	0.0387058	0.88203	0.139581	0.813133	0.101456	0.836949	0.0614119	0.916884	-0.0589745	0.999548	0.137646	0.464567	-0.0227061	0.922644	0.198555	0.50847	ENSG00000105072
ENSG00000160392	C19orf47	126526	-0.268607	0.305037	-0.0552255	0.850306	0.0610804	0.950689	-0.873576	0.00730577	-0.253824	0.59448	0.150807	0.999548	0.604969	0.000902685	0.198599	0.366674	-0.0897268	0.852256	ENSG00000160392
ENSG00000104979	C19orf53	28974	0.399486	0.0360824	0.777559	1.3173e-05	0.304424	0.425553	0.220071	0.555421	0.491766	0.116907	0.0502905	0.999548	0.179415	0.304988	0.285793	0.0998779	0.254134	0.333028	ENSG00000104979
ENSG00000188493	C19orf54	284325	-0.235454	0.465706	-0.423722	0.149366	0.194552	0.810366	0.143904	0.828326	-0.458255	0.385596	0.116368	0.999548	-0.379358	0.123198	0.034533	0.915896	0.0781845	0.899736	ENSG00000188493
ENSG00000188032	C19orf67	646457	2.7192	NA	3.49639	NA	-0.471515	NA	2.6256	NA	2.85186	NA	0.211269	NA	0.0936079	NA	0.644532	NA	-0.682785	NA	ENSG00000188032
ENSG00000183397	C19orf71	100128569	1.37201	NA	0.690949	NA	0.490102	NA	2.79135	NA	1.54135	NA	1.96449	NA	-1.41934	NA	-0.850398	NA	-1.47439	NA	ENSG00000183397
ENSG00000221916	C19orf73	55150	-3.21715	0.0567121	-0.761468	0.579798	0.64006	NA	-2.2512	NA	0.215866	NA	1.08367	0.999548	-0.965948	0.282836	-0.977333	0.300667	-0.44361	NA	ENSG00000221916
ENSG00000235034	C19orf81	342918	1.21958	0.675993	0.3556	0.911665	-0.606159	0.954933	1.12601	0.865486	0.41442	NA	-0.644678	0.999548	0.0935622	0.978447	-0.05882	0.987502	0.0385194	0.996587	ENSG00000235034
ENSG00000262874	C19orf84	147646	-0.584577	NA	-1.26565	NA	-1.46648	NA	-0.678029	NA	-1.20672	NA	-1.50489	NA	0.093452	NA	-0.0589347	NA	0.0384016	NA	ENSG00000262874
ENSG00000283567	C19orf85	111064650	1.37208	NA	0.691001	NA	0.490169	NA	1.99971	NA	1.47102	NA	1.17285	NA	-0.62763	NA	-0.780017	NA	-0.682681	NA	ENSG00000283567
ENSG00000197223	C1D	10438	-0.132084	0.750336	0.0516917	0.90303	-0.343416	0.676103	-0.236115	0.742877	0.190205	0.809698	-0.198804	0.999548	0.104031	0.756329	-0.138513	0.697337	-0.144613	0.832973	ENSG00000197223
ENSG00000106392	C1GALT1	56913	0.476104	0.0562019	0.575279	0.0135434	0.0284943	0.978289	-0.103736	0.853475	0.155634	0.780175	-0.123893	0.999548	0.57984	0.00163198	0.419646	0.0337102	0.152387	0.71071	ENSG00000106392
ENSG00000171155	C1GALT1C1	29071	0.732024	0.00463057	0.435753	0.112451	0.0563545	0.962355	1.05348	0.00419812	0.790919	0.0604836	0.149925	0.999548	-0.321453	0.17567	-0.355166	0.151296	-0.0935709	0.872067	ENSG00000171155
ENSG00000223658	C1GALT1C1L	728819	-0.888668	0.180571	-0.628547	0.286343	0.708302	0.469109	-0.32806	0.804606	0.380602	NA	0.474834	0.999548	-0.560608	0.222753	-1.00915	0.0300536	0.233469	0.809694	ENSG00000223658
ENSG00000116922	C1orf109	54955	0.855997	2.21084e-06	0.88022	9.71265e-07	0.497312	0.0946688	-0.142309	0.739845	0.00115945	0.998254	0.102244	0.999548	0.998306	3.2565e-10	0.879061	6.88135e-08	0.395069	0.107638	ENSG00000116922
ENSG00000000460	C1orf112	55732	-0.0670629	0.780616	-0.159959	0.455497	-0.314852	0.412503	0.126502	0.763847	0.0596579	0.915014	-0.147986	0.999548	-0.193565	0.267889	-0.219617	0.229244	-0.166866	0.595425	ENSG00000000460
ENSG00000162817	C1orf115	79762	-0.387201	0.421145	-0.414537	0.36639	-0.111833	0.947312	0.364633	0.688115	0.278243	0.786868	0.639652	0.999548	-0.751834	0.0459047	-0.69278	0.07752	-0.751485	0.172224	ENSG00000162817
ENSG00000182795	C1orf116	79098	-0.247225	0.904323	1.03109	0.48199	0.1366	NA	-2.02604	NA	0.440617	NA	-1.31735	0.999548	1.77881	0.172415	0.590474	0.73294	1.45395	NA	ENSG00000182795
ENSG00000197982	C1orf122	127687	0.200452	0.355551	0.377222	0.0535387	0.584856	0.0281409	-0.0119679	0.982984	-0.0374128	0.951657	0.260433	0.999548	0.21242	0.225379	0.414634	0.0135647	0.324423	0.186979	ENSG00000197982
ENSG00000175262	C1orf127	148345	-0.489814	NA	-1.17089	NA	-1.37172	NA	-0.583273	NA	-1.11196	NA	-1.41013	NA	0.0934594	NA	-0.0589273	NA	0.038409	NA	ENSG00000175262
ENSG00000143633	C1orf131	128061	0.00780649	0.976207	0.069586	0.745599	0.0148743	0.984142	-0.0600479	0.89053	0.275888	0.414253	0.0275376	0.999548	0.0678544	0.70701	-0.206302	0.2219	-0.0126633	0.979504	ENSG00000143633
ENSG00000203963	C1orf141	400757	1.37222	NA	0.691134	NA	0.490319	NA	0.378553	NA	0.749956	NA	-1.32151	NA	0.993671	NA	-0.0588226	NA	1.81182	NA	ENSG00000203963
ENSG00000131591	C1orf159	54991	0.364168	0.239206	0.504325	0.0706365	0.338434	0.579213	0.188873	0.752448	0.285056	0.610276	0.00958131	0.999548	0.175296	0.4736	0.219269	0.385597	0.328853	0.35288	ENSG00000131591
ENSG00000143110	C1orf162	128346	1.3722	0.678389	0.691126	NA	0.490289	NA	3.79734	NA	0.602955	NA	0.48057	NA	-2.42513	NA	0.0881711	NA	0.00971881	NA	ENSG00000143110
ENSG00000215910	C1orf167	284498	-2.78059	0.00529276	-2.67917	0.00209658	-0.325381	0.893322	0.204104	0.937455	-0.700629	NA	-0.0267711	0.999548	-2.98469	7.0818e-05	-1.97854	0.00381827	-0.29861	0.846378	ENSG00000215910
ENSG00000198912	C1orf174	339448	0.613185	0.000314402	0.613187	0.000289971	0.364522	0.242225	0.0965455	0.818327	0.209095	0.572945	0.169573	0.999548	0.516639	0.000561345	0.404092	0.0107363	0.194949	0.48672	ENSG00000198912
ENSG00000163263	C1orf189	388701	-1.08476	NA	-1.76584	NA	-0.165605	NA	-1.87239	NA	-2.47428	NA	-0.204099	NA	0.787626	NA	0.708437	NA	0.0384942	NA	ENSG00000163263
ENSG00000119280	C1orf198	84886	0.609037	0.00523592	0.384837	0.0945649	0.211665	0.717988	0.578386	0.101505	0.604821	0.105821	0.372355	0.999548	0.0306514	0.90524	-0.219983	0.337505	-0.16069	0.704161	ENSG00000119280
ENSG00000116667	C1orf21	81563	-0.46822	0.864393	0.262694	NA	0.600411	NA	-0.41196	NA	0.48147	NA	-0.248654	0.999548	-0.0562601	0.974452	-0.218776	0.906715	0.849066	NA	ENSG00000116667
ENSG00000253313	C1orf210	149466	1.37217	NA	0.691106	NA	0.490259	NA	1.27858	NA	0.0285857	NA	0.451728	NA	0.0935822	NA	0.66252	NA	0.0385318	NA	ENSG00000253313
ENSG00000142686	C1orf216	127703	-0.938525	4.49308e-05	-0.706929	0.00189908	0.0801937	0.931475	-0.43902	0.288061	-0.541653	0.180361	0.0411444	0.999548	-0.499505	0.012827	-0.165276	0.492867	0.0390493	0.944725	ENSG00000142686
ENSG00000239887	C1orf226	400793	-0.165502	0.770799	-0.276053	0.590582	-0.196517	0.89458	0.0549239	0.965025	0.175019	0.889039	0.317541	0.999548	-0.220426	0.637198	-0.451072	0.327004	-0.514059	0.472729	ENSG00000239887
ENSG00000282872	C1orf232	110806296	1.37205	NA	2.81509	NA	1.43986	NA	1.99969	NA	1.67729	NA	2.12254	NA	-0.627642	NA	1.13781	NA	-0.682678	NA	ENSG00000282872
ENSG00000143793	C1orf35	79169	-0.101148	0.585815	0.264354	0.0924261	0.425212	0.0579059	0.00277301	0.993683	0.398241	0.112583	0.288804	0.999548	-0.103921	0.473774	-0.133887	0.371803	0.136407	0.574067	ENSG00000143793
ENSG00000143612	C1orf43	25912	-0.628889	3.47366e-09	-0.516839	8.39493e-07	-0.211394	0.297159	-0.340549	0.039561	-0.301846	0.0913532	-0.349619	0.44586	-0.288341	0.000984111	-0.214993	0.020996	0.138225	0.34694	ENSG00000143612
ENSG00000164008	C1orf50	79078	-0.279141	0.313042	-0.184441	0.498252	0.0335972	0.97496	0.423218	0.35583	-0.0589201	0.938221	0.233414	0.999548	-0.702359	0.00161811	-0.125521	0.650108	-0.199817	0.65479	ENSG00000164008
ENSG00000162642	C1orf52	148423	0.425927	0.0142915	0.594195	0.00031694	0.105617	0.843975	-0.078506	0.850682	0.323243	0.305348	-0.0390997	0.999548	0.504433	0.000443354	0.270951	0.0905126	0.144717	0.625756	ENSG00000162642
ENSG00000203724	C1orf53	388722	0.00352506	0.995005	0.578304	0.105653	0.317531	0.730361	0.666296	0.276959	0.87253	0.138239	0.262054	0.999548	-0.662771	0.0329086	-0.294226	0.411648	0.055477	0.949542	ENSG00000203724
ENSG00000118292	C1orf54	79630	0.410436	0.887561	0.691145	NA	1.96154	NA	-0.0850784	NA	0.211023	NA	1.11756	0.999548	0.495514	0.710016	0.480122	0.741903	0.843984	NA	ENSG00000118292
ENSG00000143443	C1orf56	54964	0.344046	0.20794	0.435885	0.0865818	0.441498	0.348856	0.669003	0.080869	0.373483	0.428441	0.454416	0.999548	-0.324958	0.129929	0.0624023	0.821222	-0.0129178	0.985299	ENSG00000143443
ENSG00000198854	C1orf68	100129271	2.95406	NA	0.691043	NA	0.490211	NA	2.86041	NA	0.749801	NA	0.451632	NA	0.093654	NA	-0.0587573	NA	0.038579	NA	ENSG00000198854
ENSG00000162757	C1orf74	148304	-0.48953	0.189025	-0.39608	0.273579	0.0609906	0.965984	-0.547541	0.371202	-0.505239	0.437412	0.107452	0.999548	0.0580119	0.874868	0.109159	0.772322	-0.0464609	0.95719	ENSG00000162757
ENSG00000162598	C1orf87	127795	1.37195	NA	0.690871	NA	0.49004	NA	3.24522	NA	2.71653	NA	2.41836	NA	-1.87327	NA	-2.02566	NA	-1.92832	NA	ENSG00000162598
ENSG00000142698	C1orf94	84970	1.37209	NA	0.691031	NA	0.490184	NA	1.99974	NA	0.749746	NA	1.17289	NA	-0.627653	NA	-0.0587145	NA	-0.682703	NA	ENSG00000142698
ENSG00000173372	C1QA	712	1.37218	NA	0.691091	NA	0.490259	NA	0.557275	NA	0.749896	NA	0.451728	NA	0.814907	NA	-0.0588045	NA	0.0385318	NA	ENSG00000173372
ENSG00000173369	C1QB	713	1.37218	NA	0.691091	NA	0.490259	NA	0.557275	NA	0.749896	NA	0.451728	NA	0.814907	NA	-0.0588045	NA	0.0385318	NA	ENSG00000173369
ENSG00000108561	C1QBP	708	0.491002	1.65197e-06	0.583774	1.11279e-08	0.232259	0.223116	0.2485	0.160586	0.304928	0.0901977	0.0809564	0.999548	0.242502	0.00886655	0.278845	0.00327296	0.151302	0.317886	ENSG00000108561
ENSG00000159189	C1QC	714	1.37202	NA	0.690958	NA	0.490111	NA	2.70488	NA	1.45488	NA	1.87802	NA	-1.33286	NA	-0.763925	NA	-1.38791	NA	ENSG00000159189
ENSG00000131094	C1QL1	10882	0.129618	0.882257	0.0555886	0.947001	0.0218348	0.993367	0.334678	0.809468	0.772388	0.506172	-0.116105	0.999548	-0.20506	0.69086	-0.7168	0.136518	0.137939	0.902626	ENSG00000131094
ENSG00000144119	C1QL2	165257	1.37212	NA	0.691061	NA	2.6381	NA	1.27851	NA	0.0285075	NA	2.5995	NA	0.0936157	NA	0.662554	NA	0.0385988	NA	ENSG00000144119
ENSG00000165985	C1QL3	389941	1.37214	NA	1.65283	NA	1.47546	NA	0.557204	NA	1.71159	NA	1.43688	NA	0.814938	NA	-0.0587591	NA	0.0385775	NA	ENSG00000165985
ENSG00000186897	C1QL4	338761	2.09798	NA	1.52131	NA	0.497968	NA	3.62156	NA	3.1866	NA	1.07275	NA	-1.52358	NA	-1.66528	NA	-0.574784	NA	ENSG00000186897
ENSG00000173918	C1QTNF1	114897	0.952284	0.455558	-0.272688	0.858815	-1.77723	NA	-0.856461	NA	-1.22725	NA	-2.9758	0.999548	1.80875	0.0495093	0.95456	0.388139	1.19857	NA	ENSG00000173918
ENSG00000184163	C1QTNF12	388581	-1.85515	0.334294	-2.53623	NA	-0.0762392	NA	-0.566567	NA	-0.628958	NA	0.00553665	0.999548	-1.28858	0.258367	-1.90727	0.123059	-0.0817758	NA	ENSG00000184163
ENSG00000145861	C1QTNF2	114898	0.41044	NA	2.07175	NA	-0.471469	NA	1.03822	NA	0.423398	NA	-2.15562	NA	-0.627779	NA	1.64836	NA	1.68415	NA	ENSG00000145861
ENSG00000082196	C1QTNF3	114899	2.22138	NA	0.691124	NA	-0.471513	NA	2.12778	NA	0.0734822	NA	0.211278	NA	0.0936041	NA	0.617641	NA	-0.682791	NA	ENSG00000082196
ENSG00000273294	C1QTNF3-AMACR	NA	0.410372	NA	-0.270729	NA	-0.471548	NA	0.901618	NA	2.30783	NA	0.49408	NA	-0.491246	NA	-2.57856	NA	-0.965628	NA	ENSG00000273294
ENSG00000172247	C1QTNF4	114900	1.37211	NA	0.691016	NA	0.490184	NA	1.27843	NA	1.47106	NA	1.17289	NA	0.0936722	NA	-0.780039	NA	-0.682703	NA	ENSG00000172247
ENSG00000133466	C1QTNF6	114904	-1.22124	0.00296654	-1.60194	6.65808e-05	-0.189633	0.892982	0.827508	0.238983	-0.0492044	0.970174	0.34118	0.999548	-2.04874	7.0037e-10	-1.55273	5.5667e-06	-0.530814	0.35569	ENSG00000133466
ENSG00000184471	C1QTNF8	390664	1.37206	NA	1.65276	NA	0.490149	NA	1.99967	NA	2.43274	NA	1.17281	NA	-0.627615	NA	-0.779987	NA	-0.682666	NA	ENSG00000184471
ENSG00000240654	C1QTNF9	338872	0.410455	NA	-0.27062	NA	-0.471452	NA	0.316926	NA	-0.211763	NA	-0.509932	NA	0.0935296	NA	-0.058857	NA	0.0384792	NA	ENSG00000240654
ENSG00000205863	C1QTNF9B	387911	1.37218	NA	0.691091	NA	0.490259	NA	0.557275	NA	0.749896	NA	0.451728	NA	0.814907	NA	-0.0588045	NA	0.0385318	NA	ENSG00000205863
ENSG00000159403	C1R	715	1.57442	1.35036e-07	0.758393	0.0189101	0.275183	0.757527	1.84833	1.17144e-05	1.27668	0.008149	0.399919	0.999548	-0.273908	0.361489	-0.51829	0.0754492	-0.124736	0.856515	ENSG00000159403
ENSG00000139178	C1RL	51279	-0.776353	0.00743097	-0.569664	0.0503553	-0.184927	0.831558	0.716281	0.117209	0.516675	0.322577	0.286098	0.999548	-1.49263	3.42686e-11	-1.08634	2.6487e-06	-0.471025	0.182085	ENSG00000139178
ENSG00000182326	C1S	716	0.810438	0.022205	-0.0405475	0.931738	0.247033	0.814338	1.31137	0.00866676	0.775372	0.210268	0.390612	0.999548	-0.500935	0.104982	-0.815919	0.00749574	-0.143579	0.849421	ENSG00000182326
ENSG00000166278	C2	717	0.859718	0.655218	0.242975	NA	-2.75029	NA	2.52532	NA	1.29739	NA	-2.94325	NA	-1.66561	NA	-1.05441	NA	0.192951	NA	ENSG00000166278
ENSG00000258713	C20orf141	128653	2.01973	NA	-0.270712	NA	-0.471544	NA	4.65445	NA	1.79506	NA	0.802826	NA	-2.63472	NA	-2.06577	NA	-1.27437	NA	ENSG00000258713
ENSG00000088854	C20orf194	25943	0.0505007	0.926736	-0.0130143	0.979977	-0.0204081	0.990522	0.0862949	0.936236	0.390078	0.650062	0.0159989	0.999548	-0.0357943	0.936549	-0.403092	0.301307	-0.0364071	0.97352	ENSG00000088854
ENSG00000215595	C20orf202	400831	1.37217	NA	0.691106	NA	0.490259	NA	1.27858	NA	0.0285857	NA	0.451728	NA	0.0935822	NA	0.66252	NA	0.0385318	NA	ENSG00000215595
ENSG00000196421	C20orf204	284739	1.37223	0.589566	3.08235	NA	1.45471	NA	-0.00514773	NA	1.14217	NA	0.474536	0.999548	1.37738	0.216302	1.94018	0.0733356	0.980176	NA	ENSG00000196421
ENSG00000101220	C20orf27	54976	-0.313211	0.216078	-0.117026	0.675847	0.190638	0.765469	-0.421905	0.292297	-0.307769	0.509966	-0.0159089	0.999548	0.108694	0.638052	0.190743	0.408921	0.206547	0.579927	ENSG00000101220
ENSG00000196476	C20orf96	140680	-0.421038	0.214966	0.00717262	0.985128	0.344142	0.579213	0.119038	0.877532	0.0213486	0.982003	0.062537	0.999548	-0.540076	0.0441539	-0.014176	0.969888	0.281605	0.537707	ENSG00000196476
ENSG00000160298	C21orf58	54058	-0.222743	0.72867	-1.39026	0.0162	-0.123041	0.950388	0.418301	0.658383	-0.504298	0.63556	0.424534	0.999548	-0.641044	0.0288847	-0.885967	0.00274619	-0.547575	0.215428	ENSG00000160298
ENSG00000154642	C21orf91	54149	0.0875363	0.768761	0.191002	0.470592	-0.140021	0.849525	-0.419311	0.318222	-0.22612	0.672134	-0.155946	0.999548	0.506847	0.0161375	0.417122	0.0626587	0.0159257	0.982804	ENSG00000154642
ENSG00000169314	C22orf15	150248	1.37217	NA	0.691091	NA	0.490274	NA	1.27858	NA	0.749896	NA	-0.269582	NA	0.0935822	NA	-0.0588045	NA	0.759857	NA	ENSG00000169314
ENSG00000128346	C22orf23	84645	-1.59623	0.402233	-0.76982	NA	-0.301759	NA	-1.43164	NA	-0.880155	NA	-0.293878	0.999548	-0.164582	0.925842	0.110336	0.953488	-0.00788155	NA	ENSG00000128346
ENSG00000242259	C22orf39	128977	-0.0726346	0.893775	0.110712	0.826872	0.353023	0.74793	0.248853	0.789413	0.23421	0.814028	0.246206	0.999548	-0.321487	0.414984	-0.123498	0.792578	0.106817	0.908675	ENSG00000242259
ENSG00000157617	C2CD2	25966	0.645123	0.0018109	0.505697	0.0147034	0.0320612	0.973979	0.0821116	0.873723	0.106361	0.839744	-0.17051	0.999548	0.563012	0.00121973	0.399335	0.0329703	0.202571	0.546787	ENSG00000157617
ENSG00000172375	C2CD2L	9854	0.205094	0.497302	0.0103519	0.975171	0.0990689	0.909798	0.125466	0.816419	-0.0147551	0.982634	-0.225722	0.999548	0.0796279	0.667182	0.0251071	0.90829	0.324791	0.147492	ENSG00000172375
ENSG00000168014	C2CD3	26005	-0.297729	0.0404141	-0.253871	0.0733466	-0.30178	0.198239	-0.241856	0.312094	-0.366522	0.0967297	-0.246152	0.999548	-0.0558728	0.674901	0.11265	0.386701	-0.0556283	0.842498	ENSG00000168014
ENSG00000198535	C2CD4A	145741	1.37209	NA	1.65279	NA	2.60399	NA	1.27844	NA	1.71151	NA	2.56535	NA	0.0936527	NA	-0.058719	NA	0.0386353	NA	ENSG00000198535
ENSG00000183186	C2CD4C	126567	2.73967	NA	-0.270644	NA	-0.471485	NA	-0.0047552	NA	-0.211825	NA	0.211334	NA	2.74442	NA	-0.0588185	NA	-0.682818	NA	ENSG00000183186
ENSG00000225556	C2CD4D	100191040	1.37221	NA	0.691106	NA	0.490274	NA	-0.17206	NA	0.749934	NA	0.451765	NA	1.54427	NA	-0.0588273	NA	0.038509	NA	ENSG00000225556
ENSG00000111731	C2CD5	9847	-0.32086	0.111197	-0.541992	0.00353311	-0.161558	0.752686	-0.199225	0.608037	-0.321599	0.362528	-0.136242	0.999548	-0.121635	0.50054	-0.220392	0.215167	-0.0253159	0.957731	ENSG00000111731
ENSG00000155754	C2CD6	151254	1.37217	NA	0.691111	NA	0.490287	NA	1.2786	NA	0.0752942	NA	-0.603442	NA	0.0935732	NA	0.615817	NA	1.09373	NA	ENSG00000155754
ENSG00000273045	C2orf15	150590	-1.81272	0.12255	-4.5028	0.00416697	-1.32665	0.503998	-1.69564	NA	-3.99485	NA	-1.21483	0.999548	-0.117074	0.910259	-0.507954	0.616329	-0.111827	0.962981	ENSG00000273045
ENSG00000221843	C2orf16	84226	0.410446	NA	0.691157	NA	0.507665	NA	-0.367011	NA	-0.543658	NA	0.469137	NA	0.777457	NA	1.23481	NA	0.0385276	NA	ENSG00000221843
ENSG00000115998	C2orf42	54980	-0.158199	0.639327	0.0909444	0.783489	0.0363548	0.97496	-0.551538	0.219905	-0.248288	0.66738	-0.173277	0.999548	0.393339	0.0773324	0.339232	0.15581	0.209632	0.627837	ENSG00000115998
ENSG00000135974	C2orf49	79074	0.432576	0.0283548	0.263351	0.205163	-0.143095	0.803582	0.223472	0.575123	0.278736	0.480092	-0.099707	0.999548	0.209104	0.259072	-0.0153841	0.951869	-0.0433878	0.927657	ENSG00000135974
ENSG00000150873	C2orf50	130813	0.410496	NA	0.691166	NA	-0.471442	NA	-1.13957	NA	0.750039	NA	-0.509891	NA	1.55007	NA	-0.0588725	NA	0.0384488	NA	ENSG00000150873
ENSG00000168887	C2orf68	388969	-0.687583	0.114795	-0.791466	0.0631739	-0.0983557	0.955998	-0.197175	0.841973	-0.411162	0.649196	0.0281666	0.999548	-0.490408	0.187202	-0.380304	0.352507	-0.126522	0.891186	ENSG00000168887
ENSG00000178074	C2orf69	205327	0.161588	0.530811	0.293073	0.204503	0.0963162	0.897127	-0.177962	0.710949	-0.0373454	0.959501	-0.214624	0.999548	0.33955	0.0907983	0.330419	0.117606	0.310941	0.326644	ENSG00000178074
ENSG00000204128	C2orf72	257407	3.02728	NA	1.49304	NA	0.512161	NA	-0.080286	NA	-0.477254	NA	-0.24771	NA	3.10757	NA	1.9703	NA	0.759871	NA	ENSG00000204128
ENSG00000177994	C2orf73	129852	0.410455	NA	-0.27062	NA	-0.471452	NA	0.316926	NA	-0.211763	NA	-0.509932	NA	0.0935296	NA	-0.058857	NA	0.0384792	NA	ENSG00000177994
ENSG00000237651	C2orf74	339804	-0.96106	0.00485726	-1.38433	2.46728e-05	-0.940279	0.0622541	-0.196831	0.802328	-0.307135	0.689461	-0.138637	0.999548	-0.764229	0.00647484	-1.07719	0.000137897	-0.801642	0.0343648	ENSG00000237651
ENSG00000186132	C2orf76	130355	-0.468044	0.115833	0.0904287	0.775335	0.226792	0.736284	-0.562834	0.253349	0.159995	0.811769	-0.288508	0.999548	0.09479	0.763081	-0.0695665	0.843935	0.515301	0.157312	ENSG00000186132
ENSG00000187833	C2orf78	388960	1.37211	NA	0.691037	NA	1.47402	NA	2.71682	NA	1.46681	NA	1.46117	NA	-1.34472	NA	-0.775768	NA	0.0128497	NA	ENSG00000187833
ENSG00000188674	C2orf80	389073	1.37206	NA	0.690981	NA	1.43986	NA	1.99967	NA	1.47098	NA	2.12251	NA	-0.627615	NA	-0.780002	NA	-0.682651	NA	ENSG00000188674
ENSG00000284308	C2orf81	388963	-0.155689	0.9356	0.237241	0.886317	0.0373953	NA	-0.21989	NA	0.274161	NA	-0.21657	0.999548	0.0642009	0.967381	-0.0369196	0.983778	0.253966	NA	ENSG00000284308
ENSG00000187699	C2orf88	84281	1.37218	NA	0.691121	NA	0.490289	NA	1.27862	NA	0.0286232	NA	-0.269545	NA	0.0935596	NA	0.662498	NA	0.759834	NA	ENSG00000187699
ENSG00000228486	C2orf92	728537	0.410422	0.905369	0.691133	NA	1.14431	NA	1.31395	NA	1.0414	NA	1.69734	NA	-0.903533	NA	-0.350266	NA	-0.553034	NA	ENSG00000228486
ENSG00000125730	C3	718	1.95095	5.91491e-16	1.69813	5.38371e-12	0.229543	0.757388	1.64777	1.79316e-06	1.30511	0.000594779	0.222774	0.999548	0.303182	0.203718	0.393025	0.10602	0.00676881	0.992082	ENSG00000125730
ENSG00000171860	C3AR1	719	1.37216	NA	1.65286	NA	0.49028	NA	1.27858	NA	1.71165	NA	-0.881931	NA	0.093578	NA	-0.0587936	NA	1.37221	NA	ENSG00000171860
ENSG00000088543	C3orf18	51161	-0.844829	0.367361	-0.471844	0.590582	-1.07196	0.521386	-0.183911	0.927963	0.748325	NA	-0.33876	0.999548	-0.660919	0.298695	-1.22017	0.0551156	-0.733198	0.487944	ENSG00000088543
ENSG00000180697	C3orf22	152065	1.37212	NA	2.43183	NA	0.490208	NA	1.27848	NA	2.49056	NA	0.451627	NA	0.0936318	NA	-0.0587277	NA	0.0385815	NA	ENSG00000180697
ENSG00000174928	C3orf33	285315	0.795775	8.45492e-05	0.410948	0.0548447	0.282992	0.531732	0.679991	0.0327444	0.408117	0.294206	0.0190698	0.999548	0.115784	0.5976	0.00283069	0.99118	0.263922	0.40149	ENSG00000174928
ENSG00000179021	C3orf38	285237	0.244632	0.2556	0.207627	0.338051	-0.172261	0.752034	-0.396878	0.235087	-0.214942	0.611979	-0.155308	0.999548	0.64151	0.000103054	0.422569	0.0174071	-0.0169532	0.977256	ENSG00000179021
ENSG00000163632	C3orf49	132200	1.3722	NA	0.691106	NA	0.490289	NA	0.557312	NA	0.749933	NA	-0.269545	NA	0.814885	NA	-0.058827	NA	0.759834	NA	ENSG00000163632
ENSG00000114529	C3orf52	79669	1.51744	9.61447e-06	1.24638	0.000348503	0.38259	0.681842	0.47823	0.495966	0.629392	0.358398	-0.297257	0.999548	1.03921	0.000610086	0.616987	0.0657848	0.679847	0.141159	ENSG00000114529
ENSG00000188315	C3orf62	375341	3.66922	0.00630976	3.40288	0.011046	1.78907	0.600749	3.29952	0.0364517	3.38722	0.0391946	1.6186	0.999548	0.369701	0.316652	0.0156585	0.976738	0.170462	0.842884	ENSG00000188315
ENSG00000180044	C3orf80	401097	-0.566357	0.460039	0.474161	0.496146	0.538129	0.746193	0.145803	0.933546	0.932344	0.439287	0.367943	0.999548	-0.712161	0.218021	-0.458182	0.476191	0.170186	0.902679	ENSG00000180044
ENSG00000244731	C4A	720	1.37216	NA	1.65288	NA	0.490246	NA	2.51555	NA	1.19643	NA	1.06896	NA	-1.1434	NA	0.456454	NA	-0.578717	NA	ENSG00000244731
ENSG00000224389	C4B	721	0.410392	NA	-0.270688	NA	-0.471515	NA	3.09315	NA	1.84311	NA	-0.326356	NA	-2.68276	NA	-2.1138	NA	-0.145159	NA	ENSG00000224389
ENSG00000123838	C4BPA	722	-0.356829	0.529343	-0.455056	0.373536	0.79893	0.308224	1.3552	0.0552077	0.838292	0.303045	0.923085	0.999548	-1.71203	2.01632e-06	-1.29335	0.00032198	-0.124155	0.891186	ENSG00000123838
ENSG00000123843	C4BPB	725	1.05595	1.72142e-16	0.688547	2.27422e-07	0.490354	0.00833759	0.433407	0.0394093	0.28988	0.253119	0.0334438	0.999548	0.622541	4.89971e-08	0.398667	0.000978228	0.45691	0.00153493	ENSG00000123843
ENSG00000138813	C4orf17	84103	1.37208	NA	0.691001	NA	0.490169	NA	1.99971	NA	1.47102	NA	1.17285	NA	-0.62763	NA	-0.780017	NA	-0.682681	NA	ENSG00000138813
ENSG00000154274	C4orf19	55286	-1.09675	0.00225881	-0.38151	0.261551	-0.399802	0.562619	-0.728695	0.191576	-0.0091343	0.992436	0.188353	0.999548	-0.368059	0.169788	-0.372376	0.185074	-0.588155	0.109383	ENSG00000154274
ENSG00000164096	C4orf3	401152	-0.403002	0.140155	-0.40797	0.129551	-0.0682352	0.950689	-0.0411625	0.95403	-0.230317	0.694852	-0.0811558	0.999548	-0.36184	0.122613	-0.177654	0.51442	0.0129206	0.98554	ENSG00000164096
ENSG00000151470	C4orf33	132321	-0.376246	0.396026	0.0850408	0.859646	-0.563242	0.488439	-0.176641	0.857728	0.271348	0.7804	-0.307466	0.999548	-0.199605	0.645262	-0.186307	0.691106	-0.255776	0.755967	ENSG00000151470
ENSG00000163633	C4orf36	132989	-0.568955	NA	0.895307	NA	0.317001	NA	0.0387735	NA	2.37675	NA	0.194255	NA	-0.607729	NA	-1.48144	NA	0.122746	NA	ENSG00000163633
ENSG00000164123	C4orf45	152940	1.3722	NA	0.691106	NA	0.490289	NA	0.557312	NA	0.749933	NA	-0.269545	NA	0.814885	NA	-0.058827	NA	0.759834	NA	ENSG00000164123
ENSG00000205208	C4orf46	201725	0.285749	0.279217	0.210683	0.419525	0.199294	0.755641	0.0518563	0.940797	-0.0734301	0.922138	0.0723035	0.999548	0.233892	0.38958	0.284113	0.305788	0.126991	0.836575	ENSG00000205208
ENSG00000205129	C4orf47	441054	0.410426	NA	2.22398	NA	0.499789	NA	0.0752878	NA	3.62769	NA	0.484879	NA	0.335138	NA	-1.40371	NA	0.0149096	NA	ENSG00000205129
ENSG00000243449	C4orf48	401115	-0.21727	0.495053	-0.135258	0.681382	0.24012	0.747603	0.15051	0.813507	0.412791	0.438246	0.498935	0.999548	-0.36778	0.12674	-0.548049	0.0224021	-0.258815	0.546009	ENSG00000243449
ENSG00000181215	C4orf50	389197	1.37219	NA	0.691115	NA	0.490322	NA	1.27864	NA	0.749956	NA	-1.42312	NA	0.0935461	NA	-0.0588405	NA	1.91344	NA	ENSG00000181215
ENSG00000237136	C4orf51	646603	1.37223	NA	0.691121	NA	0.490305	NA	-0.177874	NA	0.749971	NA	-0.269507	NA	1.5501	NA	-0.05885	NA	0.759811	NA	ENSG00000237136
ENSG00000248713	C4orf54	285556	-1.29776	0.479487	-0.644518	NA	-0.766084	NA	0.279759	NA	0.637002	NA	-0.723764	0.999548	-1.57752	0.179181	-1.28152	0.288646	-0.0423192	NA	ENSG00000248713
ENSG00000106804	C5	727	-1.67541	0.00952861	-0.964705	0.0879625	-0.409293	0.778108	0.0276114	0.987222	0.117607	0.943878	0.0623567	0.999548	-1.70302	0.000192174	-1.08231	0.0179941	-0.47165	0.556648	ENSG00000106804
ENSG00000197405	C5AR1	728	-0.997645	0.52585	-0.0818786	0.956941	-0.562221	NA	0.0784239	NA	0.343423	NA	-0.0559449	0.999548	-1.07607	0.299059	-0.425302	0.716384	-0.506277	NA	ENSG00000197405
ENSG00000134830	C5AR2	27202	0.196023	0.945512	-3.58203	NA	-0.401439	NA	2.13145	NA	-3.25311	NA	-0.625983	NA	-1.93542	NA	-0.328914	NA	0.224544	NA	ENSG00000134830
ENSG00000113583	C5orf15	56951	1.44227	3.79344e-12	1.03218	1.48675e-06	0.435619	0.307261	0.962291	0.00219087	0.768439	0.0296215	0.220288	0.999548	0.479977	0.0129709	0.263742	0.228862	0.215331	0.554107	ENSG00000113583
ENSG00000082213	C5orf22	55322	-0.0388637	0.795886	-0.398588	0.000422865	-0.170251	0.488429	-0.146553	0.529773	-0.243338	0.254107	-0.169326	0.999548	0.10769	0.34444	-0.15525	0.180729	-0.000925299	0.997746	ENSG00000082213
ENSG00000181904	C5orf24	134553	-0.635287	0.00699111	-0.414409	0.0900859	-0.0658693	0.945279	-0.722216	0.0428998	-0.474752	0.26558	-0.0905423	0.999548	0.0869282	0.725279	0.0603427	0.829225	0.024673	0.970159	ENSG00000181904
ENSG00000172244	C5orf34	375444	-0.247199	0.316077	-0.0903788	0.739706	-0.145012	0.829965	0.0183856	0.977207	0.120693	0.825965	0.0495084	0.999548	-0.265584	0.187176	-0.211072	0.337508	-0.19452	0.597983	ENSG00000172244
ENSG00000178776	C5orf46	389336	-0.268903	0.6074	-0.877159	0.0503295	0.263012	0.834325	-0.0216967	0.986547	-0.596573	0.51781	0.329295	0.999548	-0.247206	0.605926	-0.280586	0.577582	-0.0662833	0.956677	ENSG00000178776
ENSG00000185056	C5orf47	133491	1.37217	NA	0.691106	NA	0.490259	NA	1.27858	NA	0.0285857	NA	0.451728	NA	0.0935822	NA	0.66252	NA	0.0385318	NA	ENSG00000185056
ENSG00000215217	C5orf49	134121	1.37221	NA	2.47021	NA	-0.471483	NA	1.27864	NA	1.80767	NA	-1.23133	NA	0.0935686	NA	0.662535	NA	0.759852	NA	ENSG00000215217
ENSG00000205765	C5orf51	285636	0.0528221	0.875146	-0.17073	0.56442	-0.207864	0.76869	-0.0395694	0.955339	-0.174386	0.781078	-0.202707	0.999548	0.0923916	0.731686	0.00365619	0.990307	-0.00515727	0.994564	ENSG00000205765
ENSG00000234511	C5orf58	133874	-2.01669	NA	-0.55796	NA	-0.661378	NA	-2.95881	NA	0.22221	NA	0.0214509	NA	0.942125	NA	-0.78017	NA	-0.682829	NA	ENSG00000234511
ENSG00000164241	C5orf63	401207	-0.434582	0.49835	0.0584057	0.930801	-0.0505375	0.982087	-0.0470647	0.976731	0.748428	NA	0.465401	0.999548	-0.387517	0.483631	-0.690022	0.214757	-0.515938	0.583319	ENSG00000164241
ENSG00000039537	C6	729	0.410485	NA	-0.270605	NA	-0.471437	NA	-0.404347	NA	-0.211726	NA	-0.509894	NA	0.814832	NA	-0.0588796	NA	0.0384567	NA	ENSG00000039537
ENSG00000112539	C6orf118	168090	0.410487	NA	0.691188	NA	0.479725	NA	-2.04745	NA	-0.674993	NA	-1.49819	NA	2.45793	NA	1.36618	NA	1.97791	NA	ENSG00000112539
ENSG00000185127	C6orf120	387263	-1.05207	0.00162369	-0.254575	0.489362	0.275629	0.75487	-0.352046	0.609189	0.183246	0.81701	0.180908	0.999548	-0.700025	0.0112489	-0.437821	0.149122	0.0947213	0.895636	ENSG00000185127
ENSG00000188112	C6orf132	647024	-1.22544	0.0110307	-0.813897	0.0983984	-0.570342	0.602512	-0.0684029	0.958264	0.00752331	0.995213	0.183709	0.999548	-1.15703	0.00309351	-0.82142	0.0503607	-0.754051	0.213465	ENSG00000188112
ENSG00000204564	C6orf136	221545	0.0337019	0.864031	0.103835	0.535965	0.1193	0.765313	-0.0102841	0.981055	0.0966163	0.787302	-0.101568	0.999548	0.0439859	0.780058	0.0072186	0.969702	0.220869	0.266006	ENSG00000204564
ENSG00000197261	C6orf141	135398	0.481694	NA	-2.18152	NA	-2.38235	NA	0.388252	NA	-2.12254	NA	-2.42071	NA	0.0934424	NA	-0.0589752	NA	0.0383611	NA	ENSG00000197261
ENSG00000204542	C6orf15	29113	-1.08533	NA	-1.76639	NA	-1.96724	NA	-1.17872	NA	-2.42872	NA	-2.00558	NA	0.0933904	NA	0.662329	NA	0.03834	NA	ENSG00000204542
ENSG00000203872	C6orf163	206412	-2.64244	0.197544	-2.36173	NA	-0.273003	NA	-1.19113	NA	0.518208	NA	0.780967	NA	-1.45131	NA	-2.87994	NA	-1.05397	NA	ENSG00000203872
ENSG00000221821	C6orf226	441150	-1.42479	0.000324375	-0.785629	0.038861	0.119135	0.933736	0.313152	0.742968	0.614134	0.435865	0.195487	0.999548	-1.73795	4.10355e-06	-1.39976	0.000153558	-0.0763511	0.936158	ENSG00000221821
ENSG00000204439	C6orf47	57827	0.108687	0.657217	0.244067	0.250168	0.42733	0.198482	0.36709	0.288214	0.462929	0.170711	0.471637	0.999548	-0.258404	0.140782	-0.218863	0.245787	-0.0443076	0.919999	ENSG00000204439
ENSG00000137434	C6orf52	347744	-1.07803	NA	-1.75911	NA	-1.95992	NA	-1.89279	NA	-1.70016	NA	-4.71684	NA	0.814764	NA	-0.0589552	NA	2.75693	NA	ENSG00000137434
ENSG00000184530	C6orf58	352999	2.33393	NA	2.43265	NA	0.490242	NA	1.51899	NA	2.49141	NA	-0.269636	NA	0.81494	NA	-0.0587624	NA	0.759878	NA	ENSG00000184530
ENSG00000112308	C6orf62	81688	-0.299857	0.189915	0.386075	0.0632762	-0.303069	0.486809	-0.89144	0.00146079	-0.0776526	0.887373	-0.648789	0.44586	0.591584	0.000146241	0.463728	0.00483018	0.34572	0.145474	ENSG00000112308
ENSG00000198663	C6orf89	221477	-0.0833153	0.680511	0.0948214	0.625333	-0.0130336	0.984965	-0.139188	0.693105	-0.0679321	0.879689	0.0892003	0.999548	0.0558722	0.747048	0.162753	0.316425	-0.102234	0.748328	ENSG00000198663
ENSG00000112936	C7	730	-0.500374	NA	-0.219688	NA	-1.3823	NA	-0.593915	NA	0.560468	NA	-0.699462	NA	0.0935411	NA	-0.780156	NA	-0.682834	NA	ENSG00000112936
ENSG00000136197	C7orf25	79020	-0.708772	0.000121322	-0.780812	7.14234e-06	-0.162236	0.726527	-0.17557	0.655783	-0.246817	0.50385	-0.136255	0.999548	-0.533202	0.000458061	-0.533995	0.000562728	-0.0259808	0.955087	ENSG00000136197
ENSG00000146576	C7orf26	79034	0.66277	3.218e-05	0.49992	0.00176881	0.17754	0.664098	-0.227338	0.453313	-0.0580593	0.898757	-0.00812719	0.999548	0.890108	2.33654e-13	0.55798	1.32042e-05	0.185667	0.417251	ENSG00000146576
ENSG00000153790	C7orf31	136895	0.319627	0.829475	0.660823	0.573998	-0.517628	0.89474	0.668643	0.763249	0.702945	NA	-0.205286	0.999548	-0.349016	0.663102	-0.042122	0.965108	-0.312342	0.852547	ENSG00000153790
ENSG00000146540	C7orf50	84310	-0.0389669	0.859119	0.205654	0.250481	0.243405	0.486809	0.00430421	0.992064	0.179668	0.610006	-0.0201464	0.999548	-0.0432711	0.805929	0.0259868	0.895877	0.263551	0.220573	ENSG00000146540
ENSG00000164746	C7orf57	136288	1.37218	NA	1.65288	NA	2.57061	NA	2.04599	NA	2.47907	NA	2.62749	NA	-0.673811	NA	-0.826189	NA	-0.0568783	NA	ENSG00000164746
ENSG00000185955	C7orf61	402573	0.141063	0.895985	0.187558	0.840532	0.177442	0.954933	0.364541	0.830597	-0.145032	NA	0.412261	0.999548	-0.223478	0.700695	0.332591	0.565092	-0.234819	0.84723	ENSG00000185955
ENSG00000157131	C8A	731	-0.874892	NA	-0.59422	NA	-1.75683	NA	-1.67269	NA	0.185986	NA	-1.07394	NA	0.797794	NA	-0.780207	NA	-0.682885	NA	ENSG00000157131
ENSG00000021852	C8B	732	1.37217	NA	0.691091	NA	0.490274	NA	1.27858	NA	0.749896	NA	-0.269582	NA	0.0935822	NA	-0.0588045	NA	0.759857	NA	ENSG00000021852
ENSG00000176919	C8G	733	-1.10445	0.695434	-0.823741	NA	-1.03065	NA	-0.720715	NA	0.245638	NA	-0.670263	NA	-0.383734	NA	-1.06938	NA	-0.360391	NA	ENSG00000176919
ENSG00000182307	C8orf33	65265	0.518222	6.47229e-07	0.449479	2.12083e-05	0.596689	4.48443e-07	-0.278674	0.110944	-0.140084	0.537242	-0.214559	0.999548	0.796896	5.05557e-20	0.589563	5.33693e-11	0.811248	7.81358e-20	ENSG00000182307
ENSG00000165084	C8orf34	116328	0.41054	NA	-0.270551	NA	-0.471383	NA	-1.13355	NA	-0.932938	NA	-1.23111	NA	1.54409	NA	0.662387	NA	0.759724	NA	ENSG00000165084
ENSG00000156172	C8orf37	157657	-0.120741	0.754534	0.0258218	0.948016	-0.18991	0.835177	-0.0608924	0.945033	0.48498	0.450838	-0.219457	0.999548	-0.0598484	0.878813	-0.459159	0.187773	0.0295473	0.977256	ENSG00000156172
ENSG00000241852	C8orf58	541565	0.181627	0.702275	0.512979	0.166711	0.434239	0.578948	-0.0678071	0.943847	0.103507	0.915455	0.147646	0.999548	0.249434	0.388544	0.409472	0.148097	0.286594	0.555271	ENSG00000241852
ENSG00000189376	C8orf76	84933	0.743165	0.0179747	0.331465	0.332996	-0.213225	0.82575	1.04112	0.0267101	0.390194	0.547497	0.0188051	0.999548	-0.297953	0.33221	-0.0587288	0.877795	-0.23203	0.695272	ENSG00000189376
ENSG00000213563	C8orf82	414919	-0.525374	0.0764419	-0.298958	0.334877	0.159286	0.859872	0.42478	0.420086	0.113628	0.88481	0.344866	0.999548	-0.950154	5.78294e-05	-0.412585	0.117156	-0.18558	0.724512	ENSG00000213563
ENSG00000253250	C8orf88	100127983	3.37375	NA	0.691125	NA	0.490283	NA	3.28671	NA	0.48388	NA	1.77993	NA	0.0870389	NA	0.207245	NA	-1.28965	NA	ENSG00000253250
ENSG00000274443	C8orf89	100130301	1.37221	NA	0.691106	NA	0.490275	NA	-0.177912	NA	0.749934	NA	0.451766	NA	1.55012	NA	-0.0588275	NA	0.0385088	NA	ENSG00000274443
ENSG00000113600	C9	735	2.33385	NA	0.691011	NA	0.490164	NA	2.96147	NA	0.749711	NA	1.17285	NA	-0.627623	NA	-0.0586994	NA	-0.682688	NA	ENSG00000113600
ENSG00000160345	C9orf116	138162	-0.671322	0.0114858	-0.86186	0.00061424	-0.133105	0.868473	0.285524	0.609189	0.201273	0.75525	-0.0678977	0.999548	-0.956846	2.79851e-05	-1.06313	4.25268e-06	-0.0652074	0.91312	ENSG00000160345
ENSG00000174038	C9orf131	138724	1.3722	NA	0.691127	NA	0.490287	NA	2.53239	NA	-0.281	NA	0.00263828	NA	-1.1602	NA	0.972126	NA	0.487649	NA	ENSG00000174038
ENSG00000204711	C9orf135	138255	1.37214	NA	0.691046	NA	2.6381	NA	0.557196	NA	0.749817	NA	2.5995	NA	0.814941	NA	-0.058771	NA	0.0385988	NA	ENSG00000204711
ENSG00000188959	C9orf152	401546	3.69122	NA	1.65287	NA	1.46998	NA	4.36624	NA	2.48028	NA	2.20005	NA	-0.675018	NA	-0.827407	NA	-0.730066	NA	ENSG00000188959
ENSG00000187753	C9orf153	389766	-0.511016	0.854476	-1.1921	NA	1.67352	NA	1.19121	NA	0.25746	NA	2.30906	0.999548	-1.70222	0.181577	-1.44956	0.271989	-0.635541	NA	ENSG00000187753
ENSG00000171159	C9orf16	79095	-0.7185	0.072788	-0.625011	0.121759	0.119005	0.939291	-0.0679446	0.947829	-0.2286	0.80763	0.128863	0.999548	-0.650555	0.0513477	-0.396412	0.291816	-0.00985821	0.992082	ENSG00000171159
ENSG00000164972	C9orf24	84688	1.37221	NA	0.691165	NA	0.490333	NA	1.27869	NA	-0.67199	NA	-0.959798	NA	0.0935162	NA	1.36315	NA	1.45013	NA	ENSG00000164972
ENSG00000135045	C9orf40	55071	0.00887788	0.972905	0.3693	0.0321295	0.317298	0.322149	0.0601523	0.893374	0.173966	0.648505	0.299118	0.999548	-0.0512744	0.790632	0.195334	0.26247	0.0181801	0.971048	ENSG00000135045
ENSG00000157653	C9orf43	257169	0.842382	0.556432	0.718592	0.592847	0.842954	0.789877	1.37387	NA	0.642733	NA	0.742595	0.999548	-0.531485	0.538113	0.0758588	0.94165	0.100359	0.963726	ENSG00000157653
ENSG00000179058	C9orf50	375759	2.33395	NA	0.691098	NA	0.490308	NA	2.24038	NA	0.749927	NA	-1.55096	NA	0.0935722	NA	-0.0588295	NA	2.04127	NA	ENSG00000179058
ENSG00000165118	C9orf64	84267	-0.0712949	0.626028	-0.25735	0.0345304	0.0792726	0.82575	-0.236943	0.278803	-0.147571	0.576447	0.152967	0.999548	0.165648	0.168315	-0.109779	0.42109	-0.0736946	0.783433	ENSG00000165118
ENSG00000147894	C9orf72	203228	0.0221329	0.948587	-0.178417	0.515764	0.0313365	0.975742	0.188805	0.733019	0.183263	0.762559	0.0128772	0.999548	-0.166672	0.519984	-0.36168	0.14714	0.0184593	0.979642	ENSG00000147894
ENSG00000136819	C9orf78	51759	0.183829	0.200412	0.0658931	0.682683	0.0298098	0.960493	0.00550012	0.987869	0.0923731	0.776231	0.0287109	0.999548	0.178329	0.134192	-0.0264799	0.86792	0.0010988	0.997746	ENSG00000136819
ENSG00000155621	C9orf85	138241	-0.180279	0.459225	0.123676	0.607092	-0.0198103	0.982693	-0.0620404	0.910004	-0.0240088	0.970495	0.0174796	0.999548	-0.118239	0.585307	0.147685	0.505827	-0.0372899	0.942529	ENSG00000155621
ENSG00000063180	CA11	770	-1.16583	0.0477606	-2.22511	0.00021813	-1.26557	0.128817	-0.372342	0.741149	-1.4585	0.104486	-0.750326	0.999548	-0.79349	0.0257007	-0.766608	0.0373588	-0.515239	0.377596	ENSG00000063180
ENSG00000074410	CA12	771	0.63226	0.0638173	0.253756	0.502183	0.220369	0.826914	0.770968	0.143422	0.551163	0.377042	0.142837	0.999548	-0.138708	0.677077	-0.297407	0.359883	0.0775317	0.917031	ENSG00000074410
ENSG00000185015	CA13	377677	0.162014	0.663256	-0.507286	0.118046	0.00962965	0.993907	-0.225254	0.755811	-0.378286	0.588612	0.0099348	0.999548	0.387269	0.228305	-0.128999	0.752259	-0.000305146	0.999809	ENSG00000185015
ENSG00000118298	CA14	23632	-2.27035	NA	-2.95143	NA	-2.20221	NA	-1.64245	NA	-2.17115	NA	-3.44879	NA	-0.627895	NA	-0.78028	NA	1.24658	NA	ENSG00000118298
ENSG00000104267	CA2	760	-0.837947	0.0316531	-0.805216	0.0297245	-0.259742	0.802855	-0.162305	0.867698	-0.205412	0.832701	-0.158038	0.999548	-0.675642	0.0668686	-0.599804	0.119102	-0.101704	0.911751	ENSG00000104267
ENSG00000164879	CA3	761	1.3722	NA	0.691136	NA	0.490319	NA	1.27866	NA	0.0286605	NA	-0.985842	NA	0.0935373	NA	0.662476	NA	1.47616	NA	ENSG00000164879
ENSG00000167434	CA4	762	1.37218	NA	0.691091	NA	0.490259	NA	0.557275	NA	0.749896	NA	0.451728	NA	0.814907	NA	-0.0588045	NA	0.0385318	NA	ENSG00000167434
ENSG00000174990	CA5A	763	1.37207	NA	0.690996	NA	1.47542	NA	1.99971	NA	1.47102	NA	1.43676	NA	-0.627637	NA	-0.780024	NA	0.0386526	NA	ENSG00000174990
ENSG00000169239	CA5B	11238	-1.15001	0.00214712	-0.827928	0.0225394	-0.598296	0.400292	-0.352345	0.655877	-0.291712	0.734497	-0.193344	0.999548	-0.797667	0.0121557	-0.536217	0.115711	-0.404952	0.467001	ENSG00000169239
ENSG00000131686	CA6	765	1.37221	NA	0.691105	NA	0.490273	NA	-0.1195	NA	0.749931	NA	0.451763	NA	1.49171	NA	-0.0588256	NA	0.0385107	NA	ENSG00000131686
ENSG00000178538	CA8	767	2.33392	NA	0.691071	NA	0.490254	NA	2.24031	NA	0.749861	NA	-0.269617	NA	0.0936122	NA	-0.0587895	NA	0.759872	NA	ENSG00000178538
ENSG00000107159	CA9	768	1.51198	0.40948	2.0199	0.244251	0.540464	0.93374	1.67108	0.623473	3.13146	NA	1.52109	0.999548	-0.159107	0.934706	-1.11156	0.541558	-0.980622	0.774339	ENSG00000107159
ENSG00000120159	CAAP1	79886	-0.146024	0.346227	-0.10885	0.477303	-0.00233162	0.996426	-0.129945	0.65618	-0.0311311	0.942873	0.0181556	0.999548	-0.0160787	0.92011	-0.0777186	0.608834	-0.0204872	0.955842	ENSG00000120159
ENSG00000135932	CAB39	51719	0.0260332	0.9203	0.063854	0.793034	-0.136599	0.813434	-0.668748	0.0189556	-0.570943	0.0722105	-0.314103	0.999548	0.694781	1.87256e-05	0.634797	0.000154961	0.177504	0.590807	ENSG00000135932
ENSG00000102547	CAB39L	81617	-1.23595	0.0420128	-1.20384	0.0270774	-0.624208	0.577432	-1.87398	0.0167937	-1.49401	0.0679973	-0.967805	0.999548	0.638027	0.115468	0.290173	0.548751	0.343597	0.67416	ENSG00000102547
ENSG00000099991	CABIN1	23523	-0.598112	0.0121766	-0.245368	0.349265	-0.179479	0.791995	-0.2562	0.597577	-0.0410367	0.957741	-0.0624695	0.999548	-0.341913	0.0978115	-0.204332	0.384405	-0.117009	0.807777	ENSG00000099991
ENSG00000134508	CABLES1	91768	0.241011	0.275703	0.271906	0.188497	-0.739875	0.00505366	-0.285143	0.418669	-0.348951	0.312117	-0.145602	0.999548	0.526154	0.000381984	0.620857	3.31409e-05	-0.594273	0.00155578	ENSG00000134508
ENSG00000149679	CABLES2	81928	-0.119638	0.743162	-0.660041	0.0255495	-0.378243	0.547528	0.486793	0.341976	0.189851	0.788859	0.132315	0.999548	-0.606431	0.0121025	-0.849892	0.000469494	-0.510557	0.149264	ENSG00000149679
ENSG00000157782	CABP1	9478	0.410351	NA	0.691053	NA	1.60551	NA	1.03805	NA	1.47112	NA	1.5669	NA	-0.627695	NA	-0.780068	NA	0.0386125	NA	ENSG00000157782
ENSG00000167791	CABP2	51475	1.37217	NA	0.691106	NA	0.490259	NA	1.27858	NA	0.0285857	NA	0.451728	NA	0.0935822	NA	0.66252	NA	0.0385318	NA	ENSG00000167791
ENSG00000175544	CABP4	57010	-1.39723	0.010582	-1.46626	0.00291556	-0.437583	0.699715	-0.255909	0.829838	-0.652846	0.480512	-0.218447	0.999548	-1.14133	0.00110425	-0.813415	0.0246846	-0.219136	0.780565	ENSG00000175544
ENSG00000100314	CABP7	164633	1.37212	NA	0.691045	NA	0.490258	NA	1.99982	NA	1.47113	NA	-0.956418	NA	-0.627697	NA	-0.780083	NA	1.44668	NA	ENSG00000100314
ENSG00000154040	CABYR	26256	-1.01644	0.000495193	-0.945002	0.000655053	-0.422014	0.46149	0.227413	0.724662	0.148048	0.837815	0.199403	0.999548	-1.24385	1.45873e-07	-1.09305	4.47699e-06	-0.621416	0.0569248	ENSG00000154040
ENSG00000160325	CACFD1	11094	-0.628731	0.297507	0.0631341	0.9155	0.15447	0.931475	0.53503	0.61316	0.449955	NA	0.851418	0.999548	-1.16376	0.00279536	-0.386821	0.354495	-0.696948	0.222026	ENSG00000160325
ENSG00000158966	CACHD1	57685	1.97743	5.58117e-06	1.46084	0.0010824	0.522395	0.665079	0.763437	0.303267	0.304454	0.767036	-0.558686	0.999548	1.21399	8.52893e-05	1.15638	0.000274833	1.08108	0.00723322	ENSG00000158966
ENSG00000141837	CACNA1A	773	1.10109	0.25893	-0.100118	0.937038	0.756745	0.752148	1.46128	NA	0.466453	NA	0.72572	0.999548	-0.360196	0.692914	-0.56657	0.546449	0.0310253	0.989076	ENSG00000141837
ENSG00000148408	CACNA1B	774	-1.08381	NA	1.34376	NA	-1.96574	NA	-0.565606	NA	1.4293	NA	0.0382458	NA	-0.518205	NA	-0.0855454	NA	-2.00398	NA	ENSG00000148408
ENSG00000151067	CACNA1C	775	3.50012	NA	2.30252	NA	1.0874	NA	4.77806	NA	1.99932	NA	0.431977	NA	-1.27794	NA	0.303209	NA	0.655421	NA	ENSG00000151067
ENSG00000157388	CACNA1D	776	-1.53048	0.499044	-0.310698	NA	0.476178	NA	-0.926251	NA	-0.805848	NA	0.486753	NA	-0.604231	NA	0.49515	NA	-0.0105744	NA	ENSG00000157388
ENSG00000198216	CACNA1E	777	-0.310409	NA	-0.991484	NA	-1.19233	NA	-1.28306	NA	-2.5711	NA	-1.89966	NA	0.972653	NA	1.57961	NA	0.707334	NA	ENSG00000198216
ENSG00000102001	CACNA1F	778	1.42747	NA	1.86553	NA	1.51354	NA	0.886893	NA	1.51272	NA	0.573562	NA	0.540576	NA	0.352811	NA	0.939981	NA	ENSG00000102001
ENSG00000006283	CACNA1G	8913	-1.50192	0.47507	0.673204	0.707678	-2.38384	NA	-2.38049	NA	0.911183	NA	-2.40822	0.999548	0.878572	0.363417	-0.23798	0.853491	0.024377	NA	ENSG00000006283
ENSG00000196557	CACNA1H	8912	1.90293	0.14809	1.22898	0.376314	1.13602	0.735876	0.535487	0.895968	0.294989	NA	0.150585	0.999548	1.36744	0.487585	0.933992	0.681766	0.985438	0.821373	ENSG00000196557
ENSG00000100346	CACNA1I	8911	2.44805	0.150858	0.149693	NA	-0.197323	NA	4.1438	NA	0.182215	NA	0.230431	NA	-1.69575	NA	-0.0325217	NA	-0.427755	NA	ENSG00000100346
ENSG00000081248	CACNA1S	779	2.00897	NA	-0.270676	NA	-0.471505	NA	2.60831	NA	0.481065	NA	-0.585891	NA	-0.599348	NA	-0.751741	NA	0.114386	NA	ENSG00000081248
ENSG00000153956	CACNA2D1	781	0.818821	0.00516487	0.813441	0.00546689	0.268488	0.740294	0.34532	0.556771	0.182089	0.800615	-0.234421	0.999548	0.473502	0.0645689	0.631352	0.0142298	0.502909	0.177656	ENSG00000153956
ENSG00000007402	CACNA2D2	9254	0.398864	NA	-1.24402	NA	0.582022	NA	-0.022081	NA	0.873088	NA	1.18426	NA	0.420945	NA	-2.11711	NA	-0.602235	NA	ENSG00000007402
ENSG00000157445	CACNA2D3	55799	-0.0213299	0.952062	-0.222722	0.425193	-0.0371627	0.973979	0.230491	0.651317	0.0514882	0.946358	-0.0904723	0.999548	-0.251821	0.239935	-0.27421	0.223762	0.0533096	0.919915	ENSG00000157445
ENSG00000151062	CACNA2D4	93589	1.37202	NA	0.69094	NA	0.490124	NA	2.72704	NA	2.19835	NA	1.17887	NA	-1.35502	NA	-1.50741	NA	-0.688746	NA	ENSG00000151062
ENSG00000067191	CACNB1	782	0.813181	0.0115504	0.664789	0.0314516	0.244895	0.782758	0.0370008	0.962599	0.0419768	0.963933	0.236346	0.999548	0.77618	3.85723e-05	0.622813	0.00161834	0.00854912	0.98927	ENSG00000067191
ENSG00000165995	CACNB2	783	1.37206	NA	0.690981	NA	1.43986	NA	1.99967	NA	1.47098	NA	2.12251	NA	-0.627615	NA	-0.780002	NA	-0.682651	NA	ENSG00000165995
ENSG00000167535	CACNB3	784	-0.965551	0.0252049	-0.619437	0.147936	-0.32478	0.769314	-0.650491	0.375439	-0.297635	0.755066	0.167178	0.999548	-0.31506	0.384272	-0.321802	0.404447	-0.491959	0.365523	ENSG00000167535
ENSG00000182389	CACNB4	785	2.95417	NA	0.691161	NA	0.490288	NA	1.20073	NA	-1.2572	NA	0.451823	NA	1.75344	NA	1.94836	NA	0.0384645	NA	ENSG00000182389
ENSG00000108878	CACNG1	786	0.410455	NA	-0.27062	NA	-0.471452	NA	0.316926	NA	-0.211763	NA	-0.509932	NA	0.0935296	NA	-0.058857	NA	0.0384792	NA	ENSG00000108878
ENSG00000166862	CACNG2	10369	0.960898	0.714971	0.547445	NA	-0.175838	NA	0.800495	NA	1.13244	NA	1.10538	0.999548	0.160403	0.950544	-0.584999	0.821187	-1.28122	NA	ENSG00000166862
ENSG00000006116	CACNG3	10368	4.44179	NA	1.65277	NA	0.49016	NA	4.34808	NA	1.71147	NA	0.451543	NA	0.0937155	NA	-0.0587041	NA	0.0386172	NA	ENSG00000006116
ENSG00000075461	CACNG4	27092	2.33391	NA	0.691056	NA	0.490224	NA	2.24027	NA	0.749823	NA	0.451655	NA	0.0936347	NA	-0.058767	NA	0.0385693	NA	ENSG00000075461
ENSG00000075429	CACNG5	27091	1.37215	NA	1.65286	NA	0.490239	NA	1.27855	NA	0.990312	NA	0.451692	NA	0.0935972	NA	0.662551	NA	0.0385468	NA	ENSG00000075429
ENSG00000130433	CACNG6	59285	0.343475	0.6216	-0.312581	0.655623	-0.789788	0.561575	0.536034	0.632055	-0.0599095	NA	-0.583288	0.999548	-0.192559	0.692231	-0.252672	0.62011	-0.2065	0.838283	ENSG00000130433
ENSG00000142408	CACNG8	59283	1.56888	0.00255032	1.21172	0.021112	0.881866	0.407346	0.503106	0.653767	0.360964	NA	0.260475	0.999548	1.06577	0.0231391	0.85076	0.0928827	0.62139	0.467001	ENSG00000142408
ENSG00000105298	CACTIN	58509	0.302663	0.106183	0.388854	0.0251388	0.164686	0.717988	0.267373	0.391187	0.411371	0.151864	0.172971	0.999548	0.0352896	0.841955	-0.0225167	0.908849	-0.00828484	0.985299	ENSG00000105298
ENSG00000151893	CACUL1	143384	0.0148106	0.954609	-0.141667	0.49141	-0.0573618	0.937686	-0.379396	0.21048	-0.355348	0.279704	-0.230997	0.999548	0.394207	0.0112502	0.213681	0.226942	0.173635	0.555546	ENSG00000151893
ENSG00000116161	CACYBP	27101	-0.356645	0.0552846	-0.2096	0.290289	-0.166495	0.731574	-0.481171	0.08611	-0.346979	0.293897	-0.108203	0.999548	0.124526	0.477413	0.13738	0.459375	-0.0582918	0.885026	ENSG00000116161
ENSG00000084774	CAD	790	0.612478	0.00499699	0.581827	0.00860611	0.339273	0.466879	0.156085	0.750186	0.146408	0.787786	0.137004	0.999548	0.456393	0.0159622	0.435418	0.0278434	0.202269	0.57578	ENSG00000084774
ENSG00000182985	CADM1	23705	1.37222	NA	0.691125	NA	0.490295	NA	0.454279	NA	1.65726	NA	-0.316343	NA	0.917938	NA	-0.966139	NA	0.806639	NA	ENSG00000182985
ENSG00000175161	CADM2	253559	1.07414	0.502657	-1.18568	NA	0.818719	NA	1.62125	NA	-1.54826	NA	1.45646	0.999548	-0.547111	0.715994	0.362579	0.815225	-0.637745	NA	ENSG00000175161
ENSG00000162706	CADM3	57863	1.37217	NA	0.691106	NA	0.490259	NA	1.27858	NA	0.0285857	NA	0.451728	NA	0.0935822	NA	0.66252	NA	0.0385318	NA	ENSG00000162706
ENSG00000105767	CADM4	199731	-0.106782	0.920201	-1.51364	0.0978219	-0.827553	0.676503	0.582678	0.732477	-0.0467813	NA	-0.164342	0.999548	-0.68946	0.333219	-1.46686	0.0439114	-0.663211	0.597694	ENSG00000105767
ENSG00000163618	CADPS	8618	3.06577	NA	1.11247	NA	0.181208	NA	2.25086	NA	-0.277593	NA	-1.7328	NA	0.814911	NA	1.39006	NA	1.91401	NA	ENSG00000163618
ENSG00000081803	CADPS2	93664	-0.596705	0.00333952	-0.074026	0.773203	0.109749	0.868473	-0.580357	0.0652284	-0.444247	0.219778	-0.0768947	0.999548	-0.0163483	0.946245	0.370221	0.0445833	0.186644	0.576449	ENSG00000081803
ENSG00000164304	CAGE1	285782	-3.36415	0.101356	-1.29271	NA	-0.992763	NA	-2.31274	NA	-0.0130526	NA	2.25952	NA	-1.05142	NA	-1.27966	NA	-3.25228	NA	ENSG00000164304
ENSG00000104327	CALB1	793	0.60375	NA	-2.03242	NA	-2.23327	NA	0.510215	NA	-3.17946	NA	-1.55041	NA	0.0935354	NA	1.14704	NA	-0.682858	NA	ENSG00000104327
ENSG00000172137	CALB2	794	-1.34183	NA	-2.02293	NA	-0.719901	NA	-1.14829	NA	0.455429	NA	1.66111	NA	-0.193546	NA	-2.47835	NA	-2.38101	NA	ENSG00000172137
ENSG00000110680	CALCA	796	1.37209	NA	2.81509	NA	1.47542	NA	1.27843	NA	2.87379	NA	1.4368	NA	0.0936532	NA	-0.0587003	NA	0.0386182	NA	ENSG00000110680
ENSG00000012822	CALCOCO1	57658	-0.644531	0.0263486	-0.422159	0.160558	-0.42066	0.4842	0.449957	0.386823	0.329427	0.582218	0.310856	0.999548	-1.09449	3.43849e-06	-0.751586	0.0023654	-0.731516	0.0213986	ENSG00000012822
ENSG00000136436	CALCOCO2	10241	-0.254151	0.0619489	-0.172874	0.213504	-0.103337	0.776041	0.259536	0.253078	0.164913	0.541944	0.123126	0.999548	-0.513687	3.46794e-06	-0.337786	0.00369401	-0.226463	0.18836	ENSG00000136436
ENSG00000004948	CALCR	799	-1.25244	NA	-1.93351	NA	-2.13435	NA	-0.624603	NA	-1.15329	NA	-1.45146	NA	-0.627835	NA	-0.780222	NA	-0.682885	NA	ENSG00000004948
ENSG00000064989	CALCRL	10203	-0.664826	NA	-1.3459	NA	0.254981	NA	0.668123	NA	0.139434	NA	1.64295	NA	-1.33295	NA	-1.48534	NA	-1.38797	NA	ENSG00000064989
ENSG00000122786	CALD1	800	0.301043	0.410214	0.531626	0.115201	0.18084	0.862725	-0.0556944	0.949064	-0.0934624	0.921966	0.12516	0.999548	0.356737	0.228591	0.625089	0.0308923	0.0556796	0.942917	ENSG00000122786
ENSG00000185933	CALHM1	255022	1.37218	NA	0.691091	NA	0.490259	NA	0.557275	NA	0.749896	NA	0.451728	NA	0.814907	NA	-0.0588045	NA	0.0385318	NA	ENSG00000185933
ENSG00000138172	CALHM2	51063	0.0781365	0.912084	0.282136	0.616178	0.159142	0.933308	-0.0705098	0.957257	0.104491	0.940742	0.0736302	0.999548	0.148646	0.728597	0.177645	0.694747	0.0855115	0.930434	ENSG00000138172
ENSG00000183128	CALHM3	119395	-0.478545	0.720118	-1.05546	0.382985	-2.05531	0.365459	0.863333	NA	0.732034	NA	-0.586196	0.999548	-1.34188	0.181593	-1.78749	0.0875785	-1.46911	0.350158	ENSG00000183128
ENSG00000164451	CALHM4	221301	-1.87432	NA	0.399172	NA	0.0154546	NA	-1.24653	NA	-2.07627	NA	-1.95535	NA	-0.627794	NA	2.47544	NA	1.9708	NA	ENSG00000164451
ENSG00000178033	CALHM5	254228	1.57285	0.000840746	1.64768	0.000262735	0.504408	0.691192	0.520294	0.624518	0.56944	NA	0.499631	0.999548	1.05255	0.0259601	1.07824	0.0260123	0.00477733	0.997746	ENSG00000178033
ENSG00000188820	CALHM6	441168	-0.544783	0.520228	-0.4325	0.562853	0.934196	0.392167	-0.136342	0.938093	0.373858	NA	0.715899	0.999548	-0.408441	0.43527	-0.806358	0.122926	0.218297	0.845519	ENSG00000188820
[truncated: 15,525 more rows]

## Sheet: TE_d padj 0.05
Differential translation efficiency in eIF3dKD, only significant DTEGs with padjusted < 0.05
gene_id	hgnc_symbol	entrez	FP_d_vs_nt.log2FoldChange	FP_d_vs_nt.padj	FP_e_vs_nt.log2FoldChange	FP_e_vs_nt.padj	FP_h_vs_nt.log2FoldChange	FP_h_vs_nt.padj	TE_d_vs_nt.log2FoldChange	TE_d_vs_nt.padj	TE_e_vs_nt.log2FoldChange	TE_e_vs_nt.padj	TE_h_vs_nt.log2FoldChange	TE_h_vs_nt.padj	mRNA_d_vs_nt.log2FoldChange	mRNA_d_vs_nt.padj	mRNA_e_vs_nt.log2FoldChange	mRNA_e_vs_nt.padj	mRNA_h_vs_nt.log2FoldChange	mRNA_h_vs_nt.padj	ensembl
ENSG00000051108	HERPUD1	9709	-1.75708	3.30613e-42	-1.07108	5.74694e-18	-0.117565	0.746631	-1.98336	2.70539e-32	-1.04902	3.35041e-09	0.0198925	0.999548	0.226281	0.0530735	-0.0220648	0.891707	-0.137457	0.514519	ENSG00000051108
ENSG00000128272	ATF4	468	-0.516208	0.000192718	-0.35618	0.00743323	-0.0654244	0.878617	-1.52782	1.07862e-21	-1.38823	2.46491e-19	-0.704036	0.000672312	1.01162	1.5702e-31	1.03205	4.00798e-33	0.638612	1.59705e-11	ENSG00000128272
ENSG00000182831	C16orf72	29035	-0.580337	6.13496e-10	-0.488398	1.21662e-07	-0.218412	0.184487	-1.18991	1.07862e-21	-0.910224	9.5203e-13	-0.378931	0.193591	0.609575	6.13014e-14	0.421826	6.3894e-07	0.160519	0.243005	ENSG00000182831
ENSG00000089053	ANAPC5	51433	-0.739177	1.21079e-19	-0.238366	0.00586543	-0.0514144	0.852171	-1.02434	1.17925e-21	-0.459856	0.000170756	-0.156422	0.999548	0.285159	5.07378e-05	0.221491	0.00277264	0.105008	0.399502	ENSG00000089053
ENSG00000187079	TEAD1	7003	-0.9006	2.73522e-08	-0.716426	1.38306e-05	-0.228196	0.550118	-1.86671	2.74095e-18	-1.57505	9.5203e-13	-0.611609	0.305085	0.966108	3.29771e-12	0.858623	1.48156e-09	0.383413	0.0606082	ENSG00000187079
ENSG00000035403	VCL	7414	1.85865	6.67761e-41	2.09887	6.50611e-53	0.30978	0.283513	1.63434	1.29825e-17	1.71789	2.63381e-19	0.278878	0.999548	0.224304	0.100435	0.380975	0.00452685	0.0309013	0.932761	ENSG00000035403
ENSG00000095787	WAC	51322	-0.890424	5.3639e-11	-0.928295	4.04754e-12	-0.549689	0.00206249	-1.49879	2.56603e-17	-1.48109	3.67927e-17	-0.661867	0.0220327	0.608366	5.48588e-08	0.552792	1.48626e-06	0.112178	0.639775	ENSG00000095787
ENSG00000023287	RB1CC1	9821	-2.21546	1.79512e-18	-1.59938	2.57928e-10	-0.494569	0.335265	-2.67992	3.20567e-15	-1.87274	1.59361e-07	-0.605163	0.999548	0.464467	0.0439122	0.273359	0.295156	0.110594	0.847452	ENSG00000023287
ENSG00000177479	ARIH2	10425	-0.467106	1.3997e-05	-0.202323	0.0749753	-0.122187	0.648886	-1.05902	1.49267e-14	-0.715593	8.87947e-07	-0.459908	0.0696922	0.591913	2.53155e-12	0.51327	3.03877e-09	0.337721	0.0018971	ENSG00000177479
ENSG00000104774	MAN2B1	4125	1.81585	6.39739e-27	1.44044	2.27485e-17	0.396642	0.255675	1.68787	1.99452e-14	1.27808	2.86333e-08	0.455658	0.999548	0.127975	0.404842	0.162362	0.304669	-0.0590158	0.869206	ENSG00000104774
ENSG00000135679	MDM2	4193	-0.914735	2.77492e-14	-0.663846	1.88919e-08	-0.408447	0.0148954	-1.22895	6.91277e-14	-0.750337	2.24926e-05	-0.665434	0.00514166	0.314216	0.00417909	0.0864912	0.527966	0.256987	0.107532	ENSG00000135679
ENSG00000010810	FYN	2534	-1.61609	9.92873e-19	-0.891475	6.40186e-08	-0.258822	0.458943	-1.74165	8.77158e-14	-1.08017	3.06213e-06	-0.67487	0.0997003	0.125569	0.425958	0.188695	0.231747	0.416048	0.0212474	ENSG00000010810
ENSG00000118495	PLAGL1	5325	-1.02543	1.34159e-09	-0.521897	0.00100222	-0.430793	0.0754991	-1.58095	2.16441e-13	-1.19736	1.09808e-08	-0.607236	0.185382	0.555522	1.26897e-05	0.675467	1.04787e-07	0.176443	0.461102	ENSG00000118495
ENSG00000130024	PHF10	55274	-0.133985	0.296451	-0.132582	0.277033	-0.150415	0.534057	-1.02283	3.55488e-13	-0.617371	5.54801e-05	-0.666915	0.000305931	0.88884	8.5241e-27	0.484788	3.53613e-08	0.5165	6.19751e-08	ENSG00000130024
ENSG00000176903	PNMA1	9240	-1.15613	2.30732e-10	-0.717353	0.000114739	0.457098	0.141131	-1.7819	4.63268e-13	-1.29006	7.18896e-07	-0.37983	0.999548	0.625778	8.93084e-05	0.572706	0.000522097	0.836928	2.48877e-06	ENSG00000176903
ENSG00000084090	STARD7	56910	-0.545938	2.75563e-11	-0.0442484	0.663906	-0.0338201	0.917905	-0.776015	8.91206e-13	-0.452095	0.000124169	-0.271606	0.44586	0.230077	0.000792111	0.407847	1.10736e-09	0.237786	0.00706068	ENSG00000084090
ENSG00000090863	GLG1	2734	1.32628	6.33589e-15	1.02566	4.16906e-09	0.227495	0.604199	1.66556	9.36763e-13	1.3648	2.39289e-08	0.276897	0.999548	-0.339288	0.0339944	-0.339142	0.0414682	-0.0494012	0.907534	ENSG00000090863
ENSG00000120438	TCP1	6950	-0.234629	0.0444976	-0.0292576	0.840299	-0.107208	0.725332	-1.01986	1.08294e-12	-0.666457	2.39761e-05	-0.223217	0.999548	0.785235	2.46986e-18	0.637199	5.22927e-12	0.116009	0.515287	ENSG00000120438
ENSG00000113384	GOLPH3	64083	-0.0995175	0.138257	-0.00931578	0.908377	-0.0650602	0.670488	-0.570284	1.10879e-12	-0.392951	3.96964e-06	-0.180897	0.776844	0.470767	2.41006e-20	0.383635	1.59871e-13	0.115837	0.16465	ENSG00000113384
ENSG00000104853	CLPTM1	1209	1.71134	1.1376e-25	1.52116	2.98592e-20	0.375648	0.249576	1.5943	1.99738e-12	1.45427	6.75027e-10	0.386712	0.999548	0.117044	0.504506	0.0668916	0.743207	-0.0110636	0.983429	ENSG00000104853
ENSG00000198015	MRPL42	28977	-0.888827	5.63583e-07	-0.704719	8.9268e-05	-0.115025	0.842324	-1.66708	2.35307e-12	-1.39497	1.74872e-08	-0.371972	0.999548	0.778249	4.04879e-07	0.69025	1.29017e-05	0.256947	0.335068	ENSG00000198015
ENSG00000075413	MARK3	4140	-0.739498	1.08491e-07	-0.478246	0.000659845	-0.201159	0.513176	-1.27404	2.40922e-12	-0.948756	7.16956e-07	-0.662362	0.0220327	0.534546	2.39356e-06	0.47051	5.95926e-05	0.461203	0.00107443	ENSG00000075413
ENSG00000091947	TMEM101	84336	0.917355	1.52893e-11	0.609272	1.30238e-05	0.2471	0.407876	1.29982	2.70209e-12	0.859849	2.16177e-05	0.346129	0.999548	-0.382468	0.00202152	-0.250576	0.0595452	-0.0990285	0.713954	ENSG00000091947
ENSG00000101544	ADNP2	22850	-0.0332015	0.841594	0.227322	0.0724012	-0.091118	0.801384	-1.07978	3.5332e-12	-0.327291	0.105277	-0.404142	0.425113	1.04658	4.17745e-29	0.554614	2.22375e-08	0.313024	0.0199879	ENSG00000101544
ENSG00000066027	PPP2R5A	5525	-0.878118	1.24013e-08	-0.490516	0.00145419	-0.154495	0.703161	-1.38412	6.24935e-12	-0.972072	3.96964e-06	-0.665167	0.0631874	0.506003	5.09852e-05	0.481557	0.000180645	0.510671	0.000917165	ENSG00000066027
ENSG00000141627	DYM	54808	-0.744089	8.58168e-10	-0.448347	0.000215146	-0.131076	0.671406	-1.07079	3.25735e-11	-0.857559	1.91726e-07	-0.343279	0.868103	0.326699	0.0013544	0.409212	6.69349e-05	0.212204	0.173505	ENSG00000141627
ENSG00000184792	OSBP2	23762	-1.30017	1.12622e-18	-0.886267	2.55876e-09	-0.324596	0.249236	-1.34213	3.25735e-11	-0.938695	1.65155e-05	-0.364748	0.999548	0.0419556	0.801748	0.0524283	0.768277	0.040152	0.910394	ENSG00000184792
ENSG00000101337	TM9SF4	9777	1.82563	9.84823e-34	1.48558	2.60537e-22	0.406484	0.14922	1.40014	3.28852e-11	1.26776	8.54208e-09	0.357655	0.999548	0.425488	0.0019667	0.217822	0.162899	0.0488289	0.895748	ENSG00000101337
[truncated: 1,943 more rows]

## Sheet: TE_e padj 0.05
Differential translation efficiency in eIF3eKD, only significant DTEGs with padjusted < 0.05
[truncated: 1,181 more rows]

## Sheet: TE_h padj 0.05
Differential translation efficiency in eIF3dKD, only significant DTEGs with padjusted < 0.05
[truncated: 22 more rows]

[truncated: 8 more sheets: MAPK signaling pathway hsa04010, ABC transporters hsa02010  , Cytoplasmic RPs, Mitochondrial RPs, TOP mRNAs, FP_d padj 0.05, FP_e padj 0.05, FP_h padj 0.05]
