# Supplementary material for: Perturbations in eIF3 subunit stoichiometry alter expression of ribosomal proteins and key components of the MAPK signaling pathways
Source: eLife. 2024 Nov 4;13:RP95846. doi: 10.7554/eLife.95846 (PMC11534336; doi:10.7554/eLife.95846)
Supplement: Supplementary file 4. [file elife-95846-supp4.xlsx]

## Sheet: Absolute
	File	Input	Cutadapt			Bowtie2 – rRNA			Bowtie2 – tRNA			STAR						HTSeq-count
			Too short	Untrimmed	Passed	unaligned	unique	ambiguous	unaligned	unique	ambiguous	unique	ambiguous	mismatches	short	other unaligned	chimeric	unique	no_feature	ambiguous
	192111754_d_FP_III_R1	118314018	866666	910379	116536973	25535896	90995450	5627	23569245	11055	1955596	13064276	9392794	4893	1058844	48438	129	11009357	1727837	327082
	192111754_d_FP_II_R1	130088015	3005670	1219460	125862885	15569535	110287681	5669	14424559	7909	1137067	7646367	5929169	3832	793865	51326	140	6150481	1298063	197823
	192111754_d_FP_I_R1	140498106	698765	1047561	138751780	26814276	111933504	4000	24923938	8903	1881435	14781690	8923797	5259	1187815	25377	153	12904793	1533031	343866
	192111754_e_FP_III_R1	169032168	2915810	1530296	164586062	42466349	122108711	11002	39424078	15319	3026952	23824585	14298284	5539	1203191	92479	139	20195941	2984399	644245
	192111754_e_FP_II_R1	150953912	2809747	1471558	146672607	28019028	118638092	15487	25319154	12753	2687121	14539087	9511889	5963	1188117	74098	93	11890125	2258861	390101
	192111754_e_FP_I_R1	151061240	724487	1016061	149320692	30508662	118807006	5024	28900854	7919	1599889	16971512	10260112	6996	1621929	40305	161	14464414	2109003	398095
	192111754_h_FP_III_R1	127835673	951806	1009092	125874775	44362862	81506843	5070	40782211	16136	3564515	26518430	13280843	4111	893988	84839	130	23059565	2697486	761379
	192111754_h_FP_II_R1	105649870	2061229	889103	102699538	26527320	76154782	17436	24087391	10665	2429264	15145880	8206435	2515	650480	82081	40	12899091	1825592	421197
	192111754_h_FP_I_R1	92005234	649489	561623	90794122	25115211	65673877	5034	23746462	6612	1362137	14494949	7701666	4086	1514750	31011	116	12795696	1335224	364029
	192111754_nt_FP_III_R1	127373910	911384	902884	125559642	42449258	83107115	3269	40042345	14014	2392899	25652382	13373685	3904	916603	95771	124	22966755	1973495	712132
	192111754_nt_FP_II_R1	121886389	1073347	1052593	119760449	34765350	84986590	8509	31195912	12585	3556853	21010888	9035191	4202	1092962	52669	140	18463129	1950376	597383
	192111754_nt_FP_I_R1	124142761	377927	905743	122859091	44515576	78329348	14167	41573065	16116	2926395	28365034	12235835	4255	917405	50536	129	25285518	2329207	750309
	d_1_mRNA_R1	53636173	2706647	93314	50836212	36162490	14651072	22650	36086157	11174	65159	28734452	6794505	2738	422839	131623	31753	16656953	11627997	449502
	d_2_mRNA_R1	45013192	3515042	51776	41446374	33506779	7932405	7190	33438250	13964	54565	26032208	6937289	1915	299513	167325	26767	13451497	12234325	346386
	d_3_mRNA_R1	51553171	2827000	90504	48635667	36646827	11972433	16407	36585770	10045	51012	29402216	6654676	2785	398826	127267	32667	17197597	11749109	455510
	d_4_mRNA_R1	53222038	3464747	85187	49672104	37099990	12553627	18487	37025328	11941	62721	29271316	7225900	2586	378632	146894	32611	17050510	11764623	456183
	e_1_mRNA_R1	49566826	2788831	64441	46713554	34366899	12321960	24695	34301893	10124	54882	27343591	6518070	2236	303313	134683	26661	16073085	10833897	436609
	e_2_mRNA_R1	57610917	3135082	74558	54401277	41937294	12449073	14910	41866669	12728	57897	33543437	7774608	2818	404644	141162	35940	19182255	13846175	515007
	e_3_mRNA_R1	49743485	2517195	76905	47149385	35276969	11855560	16856	35218040	9653	49276	28426959	6333336	2575	342914	112256	31879	16735019	11240074	451866
	e_4_mRNA_R1	52594651	3050662	70478	49473511	37477840	11977239	18432	37403536	12364	61940	29706356	7185350	2379	372200	137251	30428	17440515	11793517	472324
	h_1_mRNA_R1	49483947	2773084	74025	46636838	33877659	12738768	20411	33805179	12013	60467	26982424	6353178	2118	343336	124123	29379	15548065	11003579	430780
	h_2_mRNA_R1	37170662	2281614	45423	34843625	26910238	7921483	11904	26868479	7754	34005	21184646	5304670	1851	257493	119819	17982	11926727	8929525	328394
	h_3_mRNA_R1	50389137	3181700	70751	47136686	35803968	11316207	16511	35733221	12780	57967	28638295	6576647	2268	381841	134170	31380	16394038	11784521	459736
	h_4_mRNA_R1	58594598	3887304	84467	54622827	41622659	12979766	20402	41539323	14686	68650	32950013	7981142	2842	444215	161111	36706	18937736	13487781	524496
	nt_1_mRNA_R1	45264638	2480856	72639	42711143	31773357	10922133	15653	31714166	10087	49104	25558834	5707398	2075	316716	129143	24915	14723088	10433428	402318
	nt_2_mRNA_R1	50407959	2779594	84867	47543498	36114756	11415501	13241	36053250	11144	50362	29239797	6296995	2781	382469	131208	31831	16689235	12090681	459881
	nt_3_mRNA_R1	50469600	3189317	102193	47178090	34582408	12579089	16593	34516825	11556	54027	27600065	6403880	2655	377616	132609	30788	15723649	11425011	451405
	nt_4_mRNA_R1	48868992	3102220	78199	45688573	34806197	10867311	15065	34738958	11872	55367	27907811	6345487	2271	354435	128954	29600	16269187	11183379	455245

## Sheet: Relative to previous step
	File	Cutadapt			Bowtie2 – rRNA			Bowtie2 – tRNA			STAR						HTSeq-count
		Too short	Untrimmed	Passed	unaligned	unique	ambiguous	unaligned	unique	ambiguous	unique	ambiguous	mismatches	short	other unaligned	chimeric	unique	no_feature	ambiguous
	192111754_d_FP_III_R1	0.00732513	0.0076946	0.98498	0.219123	0.780829	4.82851e-05	0.922985	0.00043292	0.0765822	0.554293	0.398519	0.000207601	0.0449248	0.00205514	5.47323e-06	0.842707	0.132257	0.0250364
	192111754_d_FP_II_R1	0.0231049	0.00937411	0.967521	0.123702	0.876253	4.50411e-05	0.92646	0.000507979	0.0730315	0.530094	0.411047	0.000265658	0.0550357	0.00355824	9.70567e-06	0.804366	0.169762	0.0258715
	192111754_d_FP_I_R1	0.00497348	0.00745605	0.98757	0.193254	0.806718	2.88285e-05	0.929503	0.000332025	0.0701654	0.593072	0.358041	0.000211002	0.0476576	0.00101818	6.13868e-06	0.873026	0.103711	0.023263
	192111754_e_FP_III_R1	0.01725	0.00905328	0.973697	0.258019	0.741914	6.68465e-05	0.92836	0.000360733	0.0712788	0.604316	0.362679	0.000140498	0.0305192	0.00234575	3.52576e-06	0.847693	0.125266	0.0270412
	192111754_e_FP_II_R1	0.0186133	0.00974839	0.971638	0.191031	0.808863	0.000105589	0.903641	0.000455155	0.0959034	0.574233	0.37568	0.000235513	0.0469256	0.00292656	3.67311e-06	0.817804	0.155365	0.0268312
	192111754_e_FP_I_R1	0.00479598	0.00672615	0.988478	0.204316	0.79565	3.36457e-05	0.9473	0.000259566	0.0524405	0.587232	0.355011	0.000242069	0.0561205	0.0013946	5.57077e-06	0.852276	0.124267	0.0234567
	192111754_h_FP_III_R1	0.00744554	0.00789367	0.984661	0.352436	0.647523	4.02781e-05	0.919287	0.000363728	0.0803491	0.650245	0.325653	0.000100804	0.021921	0.00208029	3.18766e-06	0.869568	0.101721	0.0287113
	192111754_h_FP_II_R1	0.01951	0.00841556	0.972074	0.2583	0.74153	0.000169777	0.908022	0.000402038	0.0915759	0.628789	0.340694	0.000104411	0.027005	0.00340763	1.66062e-06	0.851657	0.120534	0.0278093
	192111754_h_FP_I_R1	0.00705926	0.00610425	0.986836	0.276617	0.723327	5.54441e-05	0.945501	0.000263267	0.0542355	0.610405	0.324329	0.000172068	0.0637884	0.00130592	4.88494e-06	0.882769	0.0921165	0.0251142
	192111754_nt_FP_III_R1	0.00715519	0.00708845	0.985756	0.33808	0.661894	2.60354e-05	0.943299	0.000330135	0.0563708	0.640631	0.333989	9.74968e-05	0.0228908	0.00239174	3.09672e-06	0.895307	0.0769322	0.0277609
	192111754_nt_FP_II_R1	0.00880613	0.00863585	0.982558	0.290291	0.709638	7.10502e-05	0.897328	0.000361998	0.10231	0.673514	0.289627	0.000134697	0.0350354	0.00168833	4.48777e-06	0.878741	0.0928269	0.0284321
	192111754_nt_FP_I_R1	0.00304429	0.00729598	0.98966	0.36233	0.637554	0.000115311	0.933899	0.000362031	0.0657387	0.682294	0.294321	0.00010235	0.0220673	0.00121559	3.10297e-06	0.891433	0.0821154	0.0264519
	d_1_mRNA_R1	0.0504631	0.00173976	0.947797	0.711353	0.288201	0.000445549	0.997889	0.000308994	0.00180184	0.796274	0.188286	7.5874e-05	0.0117175	0.00364747	0.000879922	0.579686	0.404671	0.0156433
	d_2_mRNA_R1	0.0780892	0.00115024	0.920761	0.808437	0.19139	0.000173477	0.997955	0.000416751	0.00162848	0.778516	0.207466	5.72697e-05	0.0089572	0.005004	0.00080049	0.516725	0.469969	0.0133061
	d_3_mRNA_R1	0.0548366	0.00175555	0.943408	0.753497	0.246166	0.000337345	0.998334	0.000274103	0.00139199	0.803652	0.181892	7.61225e-05	0.0109011	0.00347859	0.000892888	0.584908	0.399599	0.0154924
	d_4_mRNA_R1	0.0650999	0.0016006	0.9333	0.746898	0.25273	0.000372181	0.997988	0.00032186	0.00169059	0.790575	0.195161	6.98441e-05	0.0102263	0.00396739	0.000880775	0.582499	0.401916	0.0155846
	e_1_mRNA_R1	0.0562641	0.00130008	0.942436	0.735694	0.263777	0.000528647	0.998108	0.000294586	0.00159694	0.797145	0.190021	6.51859e-05	0.00884246	0.0039264	0.000777246	0.587819	0.396213	0.0159675
	e_2_mRNA_R1	0.0544182	0.00129416	0.944288	0.770888	0.228838	0.000274074	0.998316	0.000303501	0.00138056	0.801197	0.185699	6.73089e-05	0.00966506	0.0033717	0.000858439	0.571863	0.412783	0.0153534
	e_3_mRNA_R1	0.0506035	0.00154603	0.94785	0.748196	0.251447	0.000357502	0.99833	0.000273635	0.00139683	0.80717	0.179832	7.31159e-05	0.00973688	0.00318746	0.000905189	0.588702	0.395402	0.0158957
	e_4_mRNA_R1	0.0580033	0.00134002	0.940657	0.757533	0.242094	0.000372563	0.998017	0.000329902	0.00165271	0.794213	0.192103	6.36036e-05	0.00995093	0.00366947	0.000813506	0.587097	0.397003	0.0158998
	h_1_mRNA_R1	0.0560401	0.00149594	0.942464	0.726414	0.273148	0.000437658	0.997861	0.000354599	0.00178486	0.798174	0.187935	6.26531e-05	0.0101563	0.00367172	0.000869068	0.576229	0.407805	0.0159652
	h_2_mRNA_R1	0.0613821	0.00122201	0.937396	0.772315	0.227344	0.000341641	0.998448	0.000288143	0.00126365	0.788457	0.197431	6.88911e-05	0.00958346	0.00445946	0.00066926	0.562989	0.421509	0.0155015
	h_3_mRNA_R1	0.0631426	0.00140409	0.935453	0.759578	0.240072	0.000350279	0.998024	0.000356944	0.00161901	0.801447	0.184049	6.34703e-05	0.0106859	0.00375477	0.000878174	0.572452	0.411495	0.0160532
	h_4_mRNA_R1	0.0663424	0.00144155	0.932216	0.762001	0.237625	0.000373507	0.997998	0.000352837	0.00164934	0.793225	0.192135	6.84171e-05	0.0106938	0.00387852	0.000883645	0.574741	0.409341	0.0159179
	nt_1_mRNA_R1	0.0548078	0.00160476	0.943587	0.743913	0.255721	0.000366485	0.998137	0.000317467	0.00154545	0.805912	0.179964	6.54282e-05	0.00998658	0.00407209	0.000785611	0.576047	0.408212	0.0157409
	nt_2_mRNA_R1	0.055142	0.0016836	0.943174	0.759615	0.240106	0.000278503	0.998297	0.000308572	0.0013945	0.811017	0.174658	7.71359e-05	0.0106084	0.00363928	0.000882889	0.570771	0.413501	0.0157279
	nt_3_mRNA_R1	0.0631928	0.00202484	0.934782	0.733018	0.26663	0.00035171	0.998104	0.000334158	0.00156227	0.799612	0.185529	7.6919e-05	0.0109401	0.00384187	0.000891971	0.569696	0.413949	0.0163552
	nt_4_mRNA_R1	0.0634803	0.00160018	0.934919	0.761814	0.237856	0.000329732	0.998068	0.000341089	0.00159072	0.803358	0.182662	6.53733e-05	0.0102028	0.00371209	0.000852069	0.582962	0.400726	0.0163125

## Sheet: Relative to input
	File	Cutadapt			Bowtie2 – rRNA			Bowtie2 – tRNA			STAR						HTSeq-count
		Too short	Untrimmed	Passed	unaligned	unique	ambiguous	unaligned	unique	ambiguous	unique	ambiguous	mismatches	short	other unaligned	chimeric	unique	no_feature	ambiguous
	192111754_d_FP_III_R1	0.00732513	0.0076946	0.98498	0.215832	0.769101	4.75599e-05	0.199209	9.34378e-05	0.0165289	0.11042	0.0793887	4.1356e-05	0.00894944	0.000409402	1.09032e-06	0.093052	0.0146038	0.00276452
	192111754_d_FP_II_R1	0.0231049	0.00937411	0.967521	0.119685	0.847793	4.35782e-05	0.110883	6.07973e-05	0.00874075	0.0587784	0.0455781	2.9457e-05	0.00610252	0.000394548	1.07619e-06	0.0472794	0.00997834	0.00152069
	192111754_d_FP_I_R1	0.00497348	0.00745605	0.98757	0.190852	0.79669	2.84701e-05	0.177397	6.33674e-05	0.0133912	0.105209	0.0635154	3.74311e-05	0.00845431	0.000180622	1.08898e-06	0.0918503	0.0109114	0.00244748
	192111754_e_FP_III_R1	0.01725	0.00905328	0.973697	0.251232	0.722399	6.50882e-05	0.233234	9.06277e-05	0.0179075	0.140947	0.0845891	3.27689e-05	0.00711812	0.000547109	8.22329e-07	0.11948	0.0176558	0.00381138
	192111754_e_FP_II_R1	0.0186133	0.00974839	0.971638	0.185613	0.785923	0.000102594	0.167728	8.44827e-05	0.0178009	0.0963147	0.0630119	3.95021e-05	0.00787073	0.000490865	6.16082e-07	0.0787666	0.0149639	0.00258424
	192111754_e_FP_I_R1	0.00479598	0.00672615	0.988478	0.201962	0.786482	3.3258e-05	0.191319	5.24224e-05	0.010591	0.112349	0.0679202	4.63123e-05	0.0107369	0.000266812	1.06579e-06	0.095752	0.0139612	0.00263532
	192111754_h_FP_III_R1	0.00744554	0.00789367	0.984661	0.34703	0.637591	3.96603e-05	0.319021	0.000126225	0.0278836	0.207442	0.10389	3.21585e-05	0.00699326	0.000663657	1.01693e-06	0.180384	0.0211012	0.00595592
	192111754_h_FP_II_R1	0.01951	0.00841556	0.972074	0.251087	0.720822	0.000165036	0.227993	0.000100947	0.0229935	0.143359	0.0776758	2.3805e-05	0.00615694	0.000776915	3.78609e-07	0.122093	0.0172796	0.00398673
	192111754_h_FP_I_R1	0.00705926	0.00610425	0.986836	0.272976	0.713806	5.47143e-05	0.258099	7.18655e-05	0.014805	0.157545	0.083709	4.44105e-05	0.0164637	0.000337057	1.2608e-06	0.139076	0.0145125	0.00395661
	192111754_nt_FP_III_R1	0.00715519	0.00708845	0.985756	0.333265	0.652466	2.56646e-05	0.314368	0.000110023	0.0187864	0.201394	0.104995	3.06499e-05	0.00719616	0.000751889	9.73512e-07	0.18031	0.0154937	0.00559088
	192111754_nt_FP_II_R1	0.00880613	0.00863585	0.982558	0.285227	0.697261	6.98109e-05	0.255943	0.000103252	0.0291817	0.172381	0.074128	3.44747e-05	0.00896706	0.000432116	1.14861e-06	0.151478	0.0160016	0.00490115
	192111754_nt_FP_I_R1	0.00304429	0.00729598	0.98966	0.358584	0.630962	0.000114119	0.334881	0.000129818	0.0235728	0.228487	0.0985626	3.42751e-05	0.00738992	0.00040708	1.03913e-06	0.203681	0.0187623	0.00604392
	d_1_mRNA_R1	0.0504631	0.00173976	0.947797	0.674218	0.273157	0.00042229	0.672795	0.00020833	0.00121483	0.535729	0.126678	5.10476e-05	0.00788347	0.002454	0.000592007	0.310554	0.216794	0.00838058
	d_2_mRNA_R1	0.0780892	0.00115024	0.920761	0.744377	0.176224	0.000159731	0.742854	0.00031022	0.0012122	0.578324	0.154117	4.25431e-05	0.00665389	0.00371724	0.000594648	0.298835	0.271794	0.00769521
	d_3_mRNA_R1	0.0548366	0.00175555	0.943408	0.710855	0.232235	0.000318254	0.709671	0.000194847	0.000989503	0.570328	0.129084	5.40219e-05	0.00773621	0.00246866	0.000633656	0.33359	0.227903	0.00883573
	d_4_mRNA_R1	0.0650999	0.0016006	0.9333	0.697079	0.235873	0.000347356	0.695677	0.000224362	0.00117848	0.549985	0.135769	4.85889e-05	0.0071142	0.00276002	0.000612735	0.320366	0.221048	0.00857132
	e_1_mRNA_R1	0.0562641	0.00130008	0.942436	0.693345	0.248593	0.000498216	0.692033	0.00020425	0.00110723	0.551651	0.131501	4.51108e-05	0.00611927	0.0027172	0.00053788	0.324271	0.218572	0.00880849
	e_2_mRNA_R1	0.0544182	0.00129416	0.944288	0.72794	0.216089	0.000258805	0.726714	0.00022093	0.00100497	0.582241	0.13495	4.89143e-05	0.00702374	0.00245026	0.00062384	0.332962	0.240339	0.0089394
	e_3_mRNA_R1	0.0506035	0.00154603	0.94785	0.709178	0.238334	0.000338858	0.707993	0.000194056	0.000990602	0.571471	0.12732	5.17656e-05	0.00689365	0.0022567	0.000640868	0.336426	0.225961	0.00908392
	e_4_mRNA_R1	0.0580033	0.00134002	0.940657	0.712579	0.227727	0.000350454	0.711166	0.000235081	0.00117769	0.564817	0.136618	4.52327e-05	0.00707677	0.0026096	0.000578538	0.331602	0.224234	0.00898046
	h_1_mRNA_R1	0.0560401	0.00149594	0.942464	0.684619	0.257432	0.000412477	0.683154	0.000242766	0.00122195	0.545276	0.128389	4.28018e-05	0.00693833	0.00250835	0.000593708	0.314204	0.222367	0.00870545
	h_2_mRNA_R1	0.0613821	0.00122201	0.937396	0.723964	0.213111	0.000320253	0.722841	0.000208605	0.000914834	0.569929	0.142711	4.97973e-05	0.00692732	0.00322348	0.000483769	0.320864	0.24023	0.00883476
	h_3_mRNA_R1	0.0631426	0.00140409	0.935453	0.710549	0.224576	0.00032767	0.709145	0.000253626	0.00115039	0.568343	0.130517	4.50097e-05	0.00757784	0.00266268	0.000622753	0.325349	0.23387	0.00912371
	h_4_mRNA_R1	0.0663424	0.00144155	0.932216	0.71035	0.221518	0.000348189	0.708928	0.000250637	0.00117161	0.562339	0.13621	4.85028e-05	0.00758116	0.00274959	0.00062644	0.323199	0.230188	0.00895127
	nt_1_mRNA_R1	0.0548078	0.00160476	0.943587	0.701947	0.241295	0.000345811	0.700639	0.000222845	0.00108482	0.564653	0.12609	4.58415e-05	0.00699699	0.00285307	0.00055043	0.325267	0.230498	0.00888813
	nt_2_mRNA_R1	0.055142	0.0016836	0.943174	0.716449	0.226462	0.000262677	0.715229	0.000221076	0.000999088	0.580063	0.124921	5.51699e-05	0.00758747	0.00260292	0.000631468	0.331083	0.239857	0.00912318
	nt_3_mRNA_R1	0.0631928	0.00202484	0.934782	0.685213	0.249241	0.000328772	0.683913	0.00022897	0.00107049	0.546865	0.126886	5.26059e-05	0.00748205	0.0026275	0.000610031	0.311547	0.226374	0.0089441
	nt_4_mRNA_R1	0.0634803	0.00160018	0.934919	0.712235	0.222376	0.000308273	0.710859	0.000242935	0.00113297	0.571074	0.129847	4.64712e-05	0.00725276	0.00263877	0.000605701	0.332914	0.228844	0.00931562
